# Supplementary material
Source: publisher figshare collection journal article supplement (https://acs.figshare.com/ndownloader/files/8172872)
Supplement: Supplementary file 1 [file 8172872]

 
data_FR121V1
 
_audit_creation_method            'SHELXL-2014/7'
_shelx_SHELXL_version_number      '2014/7'
_chemical_name_systematic         ?
_chemical_name_common             ?
_chemical_melting_point           ?
_chemical_formula_moiety          ?
_chemical_formula_sum
 'C98 Cl21.25' 
_chemical_formula_weight          1930.47

loop_
 _atom_type_symbol
 _atom_type_description
 _atom_type_scat_dispersion_real
 _atom_type_scat_dispersion_imag
 _atom_type_scat_source
 'C'  'C'   0.0033   0.0016
 'International Tables Vol C Tables 4.2.6.8 and 6.1.1.4'
 'Cl'  'Cl'   0.1484   0.1585
 'International Tables Vol C Tables 4.2.6.8 and 6.1.1.4'
 
_space_group_crystal_system       triclinic
_space_group_IT_number            2
_space_group_name_H-M_alt         'P -1'
_space_group_name_Hall            '-P 1'
 
_shelx_space_group_comment
;
The symmetry employed for this shelxl refinement is uniquely defined
by the following loop, which should always be used as a source of
symmetry information in preference to the above space-group names.
They are only intended as comments.
;
 
loop_
 _space_group_symop_operation_xyz
 'x, y, z'
 '-x, -y, -z'
 
_cell_length_a                    10.6130(10)
_cell_length_b                    14.3150(10)
_cell_length_c                    22.5880(10)
_cell_angle_alpha                 95.820(5)
_cell_angle_beta                  90.535(3)
_cell_angle_gamma                 103.840(5)
_cell_volume                      3312.9(4)
_cell_formula_units_Z             2
_cell_measurement_temperature     100(2)
_cell_measurement_reflns_used     16500
_cell_measurement_theta_min       5
_cell_measurement_theta_max       31
 
_exptl_crystal_description        block
_exptl_crystal_colour             orange
_exptl_crystal_density_meas       ?
_exptl_crystal_density_method     ?
_exptl_crystal_density_diffrn     1.935          
_exptl_crystal_F_000              1899
_exptl_transmission_factor_min    ?
_exptl_transmission_factor_max    ?
_exptl_crystal_size_max           0.020
_exptl_crystal_size_mid           0.010
_exptl_crystal_size_min           0.010
_exptl_absorpt_coefficient_mu     1.786
_shelx_estimated_absorpt_T_min    0.981
_shelx_estimated_absorpt_T_max    0.991
_exptl_absorpt_correction_type    none
_exptl_absorpt_correction_T_min   ?
_exptl_absorpt_correction_T_max   ?
_exptl_absorpt_process_details    ?
_exptl_absorpt_special_details    ?
_diffrn_ambient_temperature       100(2)
_diffrn_radiation_wavelength      0.895
_diffrn_radiation_type            synchrotron                          
_diffrn_source                    'BL 14.3 PSF, BESSY, Berlin, Germany'
_diffrn_measurement_device_type   MAR225                              
_diffrn_measurement_method        CCD                               
_diffrn_detector_area_resol_mean  ?
_diffrn_reflns_number             48465
_diffrn_reflns_av_unetI/netI      0.1173
_diffrn_reflns_av_R_equivalents   0.1529
_diffrn_reflns_limit_h_min        -11
_diffrn_reflns_limit_h_max        11
_diffrn_reflns_limit_k_min        -17
_diffrn_reflns_limit_k_max        17
_diffrn_reflns_limit_l_min        -27
_diffrn_reflns_limit_l_max        27
_diffrn_reflns_theta_min          2.284
_diffrn_reflns_theta_max          36.068
_diffrn_reflns_theta_full         32.450
_diffrn_measured_fraction_theta_max   0.780
_diffrn_measured_fraction_theta_full  0.903
_diffrn_reflns_Laue_measured_fraction_max    0.780
_diffrn_reflns_Laue_measured_fraction_full   0.903
_diffrn_reflns_point_group_measured_fraction_max   0.780
_diffrn_reflns_point_group_measured_fraction_full  0.903
_reflns_number_total              12323
_reflns_number_gt                 6872
_reflns_threshold_expression      'I > 2\s(I)'
_reflns_Friedel_coverage          0.000
_reflns_Friedel_fraction_max      .
_reflns_Friedel_fraction_full     .
 
_reflns_special_details
;
 Reflections were merged by SHELXL according to the crystal
 class for the calculation of statistics and refinement.
 
 _reflns_Friedel_fraction is defined as the number of unique
 Friedel pairs measured divided by the number that would be
 possible theoretically, ignoring centric projections and
 systematic absences.
;
 
_computing_data_collection        XDS
_computing_cell_refinement        XDS
_computing_data_reduction         XDS
_computing_structure_solution     SHELXS
_computing_structure_refinement 'SHELXL-2014/7 (Sheldrick, 2014)'
_computing_molecular_graphics     ?
_computing_publication_material   ?
_refine_special_details           ?
_refine_ls_structure_factor_coef  Fsqd
_refine_ls_matrix_type            full
_refine_ls_weighting_scheme       calc
_refine_ls_weighting_details
'w=1/[\s^2^(Fo^2^)+(0.0800P)^2^+4.0000P] where P=(Fo^2^+2Fc^2^)/3'
_atom_sites_solution_primary      ?
_atom_sites_solution_secondary    difmap
_atom_sites_solution_hydrogens    .
_refine_ls_hydrogen_treatment     undef
_refine_ls_extinction_method      none
_refine_ls_extinction_coef        .
_refine_ls_number_reflns          12323
_refine_ls_number_parameters      1090
_refine_ls_number_restraints      0
_refine_ls_R_factor_all           0.1495
_refine_ls_R_factor_gt            0.0722
_refine_ls_wR_factor_ref          0.1742
_refine_ls_wR_factor_gt           0.1527
_refine_ls_goodness_of_fit_ref    1.001
_refine_ls_restrained_S_all       1.001
_refine_ls_shift/su_max           0.001
_refine_ls_shift/su_mean          0.000
 
loop_
 _atom_site_label
 _atom_site_type_symbol
 _atom_site_fract_x
 _atom_site_fract_y
 _atom_site_fract_z
 _atom_site_U_iso_or_equiv
 _atom_site_adp_type
 _atom_site_occupancy
 _atom_site_site_symmetry_order  
 _atom_site_calc_flag
 _atom_site_refinement_flags_posn
 _atom_site_refinement_flags_adp
 _atom_site_refinement_flags_occupancy
 _atom_site_disorder_assembly
 _atom_site_disorder_group
Cl1 Cl 0.1291(2) 1.14338(12) 0.14496(10) 0.0419(5) Uani 1 1 d . . . . .
Cl2 Cl 0.3064(2) 1.13049(12) 0.46727(9) 0.0375(5) Uani 1 1 d . . . . .
Cl3 Cl 0.1405(2) 0.96333(13) 0.52162(9) 0.0372(5) Uani 1 1 d . . . . .
Cl4 Cl 0.04641(19) 0.72977(13) 0.54271(9) 0.0364(4) Uani 1 1 d . . . . .
Cl5 Cl -0.08209(18) 0.29455(11) 0.28275(9) 0.0349(5) Uani 1 1 d . . . . .
Cl6 Cl -0.05329(18) 0.32488(11) 0.13732(9) 0.0346(5) Uani 1 1 d . . . . .
Cl7 Cl 0.0787(2) 0.41562(14) 0.03409(9) 0.0481(6) Uani 1 1 d . . . . .
Cl8 Cl 0.06502(19) 0.91571(13) 0.01369(9) 0.0375(5) Uani 1 1 d . . . . .
Cl9 Cl 0.48233(19) 1.24507(11) 0.21182(9) 0.0402(5) Uani 1 1 d . . . . .
Cl10 Cl 0.56780(19) 1.22056(11) 0.37963(9) 0.0367(5) Uani 1 1 d . . . . .
Cl11 Cl 0.31423(18) 0.56260(11) 0.52579(8) 0.0312(4) Uani 1 1 d . . . . .
Cl12 Cl 0.25205(17) 0.33568(10) 0.39122(8) 0.0287(4) Uani 1 1 d . . . . .
Cl13 Cl 0.3050(3) 0.35516(17) 0.07854(12) 0.0278(8) Uani 0.628(5) 1 d . . P . .
Cl14 Cl 0.36800(19) 0.56226(13) -0.02062(8) 0.0353(4) Uani 1 1 d . . . . .
Cl15 Cl 0.35685(19) 0.82558(13) -0.03960(8) 0.0384(5) Uani 1 1 d . . . . .
Cl16 Cl 0.77191(18) 1.10778(12) 0.16547(8) 0.0346(5) Uani 1 1 d . . . . .
Cl17 Cl 0.83687(18) 1.05843(11) 0.32622(8) 0.0323(4) Uani 1 1 d . . . . .
Cl18 Cl 0.66085(17) 0.66784(11) 0.45594(8) 0.0273(4) Uani 1 1 d . . . . .
Cl19 Cl 0.59662(17) 0.44974(10) 0.33015(8) 0.0269(4) Uani 1 1 d . . . . .
Cl20 Cl 0.6363(3) 0.47487(17) 0.17990(12) 0.0276(8) Uani 0.628(5) 1 d . . P . .
Cl21 Cl 0.71906(18) 0.65679(12) 0.08088(9) 0.0349(4) Uani 1 1 d . . . . .
Cl22 Cl 0.71027(19) 0.91639(13) 0.04564(9) 0.0383(5) Uani 1 1 d . . . . .
C1 C -0.0249(7) 0.8244(5) 0.3109(3) 0.0296(17) Uani 1 1 d . . . . .
C2 C -0.0720(7) 0.7259(5) 0.3242(3) 0.0273(16) Uani 1 1 d . . . . .
C3 C -0.0939(7) 0.6461(5) 0.2759(3) 0.0255(16) Uani 1 1 d . . . . .
C4 C -0.0707(7) 0.6642(5) 0.2156(3) 0.0284(17) Uani 1 1 d . . . . .
C5 C -0.0557(7) 0.7642(5) 0.2028(3) 0.0255(16) Uani 1 1 d . . . . .
C6 C -0.0344(7) 0.8419(5) 0.2493(3) 0.0283(16) Uani 1 1 d . . . . .
C7 C 0.0215(7) 0.9356(5) 0.2339(3) 0.0307(17) Uani 1 1 d . . . . .
C8 C 0.1078(8) 1.0040(5) 0.2756(4) 0.0356(19) Uani 1 1 d . . . . .
C9 C 0.1309(7) 0.9848(5) 0.3335(3) 0.0290(17) Uani 1 1 d . . . . .
C10 C 0.0512(7) 0.8959(5) 0.3546(3) 0.0306(17) Uani 1 1 d . . . . .
C11 C 0.0843(7) 0.8700(5) 0.4108(3) 0.0293(17) Uani 1 1 d . . . . .
C12 C 0.0342(7) 0.7757(5) 0.4237(3) 0.0282(17) Uani 1 1 d . . . . .
C13 C -0.0469(7) 0.7058(5) 0.3817(3) 0.0290(17) Uani 1 1 d . . . . .
C14 C -0.0402(7) 0.6104(5) 0.3954(3) 0.0270(16) Uani 1 1 d . . . . .
C15 C -0.0617(7) 0.5365(5) 0.3502(3) 0.0271(16) Uani 1 1 d . . . . .
C16 C -0.0902(7) 0.5527(5) 0.2905(3) 0.0260(16) Uani 1 1 d . . . . .
C17 C -0.0506(7) 0.4861(4) 0.2495(3) 0.0267(16) Uani 1 1 d . . . . .
C18 C -0.0176(6) 0.5051(4) 0.1926(3) 0.0238(15) Uani 1 1 d . . . . .
C19 C -0.0316(7) 0.5948(4) 0.1742(3) 0.0262(16) Uani 1 1 d . . . . .
C20 C 0.0366(7) 0.6272(5) 0.1217(3) 0.0312(17) Uani 1 1 d . . . . .
C21 C 0.0334(7) 0.7202(5) 0.1067(3) 0.0315(18) Uani 1 1 d . . . . .
C22 C -0.0186(7) 0.7853(5) 0.1455(3) 0.0261(16) Uani 1 1 d . . . . .
C23 C 0.0374(7) 0.8815(5) 0.1320(3) 0.0323(18) Uani 1 1 d . . . . .
C24 C 0.0569(7) 0.9553(5) 0.1757(3) 0.0321(18) Uani 1 1 d . . . . .
C25 C 0.1722(8) 1.0426(5) 0.1765(4) 0.0353(19) Uani 1 1 d . . . . .
C26 C 0.2000(8) 1.0645(5) 0.2435(4) 0.040(2) Uani 1 1 d . . . . .
C27 C 0.3217(9) 1.1010(5) 0.2676(4) 0.047(2) Uani 1 1 d . . . . .
C28 C 0.3495(9) 1.0860(5) 0.3269(4) 0.046(2) Uani 1 1 d . . . . .
C29 C 0.2502(8) 1.0339(5) 0.3608(3) 0.038(2) Uani 1 1 d . . . . .
C30 C 0.2912(8) 1.0161(5) 0.4223(3) 0.0337(18) Uani 1 1 d . . . . .
C31 C 0.1994(7) 0.9285(5) 0.4505(3) 0.0303(17) Uani 1 1 d . . . . .
C32 C 0.2855(7) 0.8596(5) 0.4578(3) 0.0257(16) Uani 1 1 d . . . . .
C33 C 0.2455(7) 0.7626(5) 0.4639(3) 0.0242(15) Uani 1 1 d . . . . .
C34 C 0.0988(7) 0.7230(4) 0.4665(3) 0.0295(17) Uani 1 1 d . . . . .
C35 C 0.0573(7) 0.6199(5) 0.4389(3) 0.0276(16) Uani 1 1 d . . . . .
C36 C 0.1407(7) 0.5583(5) 0.4335(3) 0.0256(16) Uani 1 1 d . . . . .
C37 C 0.1173(7) 0.4802(4) 0.3877(3) 0.0230(15) Uani 1 1 d . . . . .
C38 C 0.0136(7) 0.4665(4) 0.3484(3) 0.0259(16) Uani 1 1 d . . . . .
C39 C 0.0117(7) 0.4186(4) 0.2853(3) 0.0256(16) Uani 1 1 d . . . . .
C40 C 0.1467(6) 0.4274(4) 0.2632(3) 0.0220(15) Uani 1 1 d . . . . .
C41 C 0.1626(7) 0.4329(4) 0.2040(3) 0.0272(17) Uani 1 1 d . . . . .
C42 C 0.0588(7) 0.4406(4) 0.1585(3) 0.0257(16) Uani 1 1 d . . . . .
C43 C 0.1373(7) 0.4827(4) 0.1040(3) 0.0253(16) Uani 1 1 d . . . . .
C44 C 0.1323(8) 0.5848(5) 0.0951(3) 0.0355(19) Uani 1 1 d . . . . .
C45 C 0.2322(9) 0.6424(5) 0.0644(4) 0.043(2) Uani 1 1 d . . . . .
C46 C 0.2286(9) 0.7377(5) 0.0532(4) 0.039(2) Uani 1 1 d . . . . .
C47 C 0.1273(8) 0.7724(5) 0.0713(3) 0.0333(18) Uani 1 1 d . . . . .
C48 C 0.1260(8) 0.8790(5) 0.0805(3) 0.0323(18) Uani 1 1 d . . . . .
C49 C 0.2622(8) 0.9401(5) 0.0986(4) 0.0364(19) Uani 1 1 d . . . . .
C50 C 0.2833(7) 1.0151(5) 0.1450(4) 0.0318(18) Uani 1 1 d . . . . .
C51 C 0.4095(8) 1.0530(5) 0.1705(4) 0.042(2) Uani 1 1 d . . . . .
C52 C 0.4377(8) 1.1197(5) 0.2285(4) 0.045(2) Uani 1 1 d . . . . .
C53 C 0.5713(18) 1.0808(12) 0.2417(9) 0.035(5) Uiso 0.47(2) 1 d . . P . .
C53A C 0.5267(13) 1.1005(8) 0.2765(5) 0.018(4) Uiso 0.53(2) 1 d . . P . .
C54 C 0.5913(15) 1.0705(10) 0.2946(8) 0.024(5) Uiso 0.47(2) 1 d . . P . .
C54A C 0.6158(13) 1.0533(8) 0.2582(6) 0.015(4) Uiso 0.53(2) 1 d . . P . .
C55 C 0.4912(9) 1.1016(5) 0.3418(4) 0.045(2) Uani 1 1 d . . . . .
C56 C 0.5105(8) 1.0225(5) 0.3785(4) 0.042(2) Uani 1 1 d . . . . .
C57 C 0.4185(7) 0.9880(5) 0.4167(4) 0.0332(18) Uani 1 1 d . . . . .
C58 C 0.4107(7) 0.8975(4) 0.4370(3) 0.0282(17) Uani 1 1 d . . . . .
C59 C 0.4914(7) 0.8375(4) 0.4168(3) 0.0284(17) Uani 1 1 d . . . . .
C60 C 0.4508(7) 0.7377(4) 0.4271(3) 0.0248(16) Uani 1 1 d . . . . .
C61 C 0.3321(7) 0.7010(4) 0.4500(3) 0.0252(16) Uani 1 1 d . . . . .
C62 C 0.2804(7) 0.5912(4) 0.4511(3) 0.0257(16) Uani 1 1 d . . . . .
C63 C 0.3402(7) 0.5347(4) 0.4039(3) 0.0224(15) Uani 1 1 d . . . . .
C64 C 0.2391(7) 0.4527(4) 0.3692(3) 0.0236(16) Uani 1 1 d . . . . .
C65 C 0.2583(6) 0.4512(4) 0.3029(3) 0.0215(15) Uani 1 1 d . . . . .
C66 C 0.3805(7) 0.4874(4) 0.2793(3) 0.0243(16) Uani 1 1 d . . . . .
C67 C 0.3962(7) 0.4968(5) 0.2187(3) 0.0256(16) Uani 1 1 d . . . . .
C68 C 0.2850(7) 0.4629(5) 0.1812(3) 0.0292(17) Uani 1 1 d . . . . .
C69 C 0.2778(8) 0.4756(6) 0.1184(4) 0.048(2) Uani 1 1 d . . . . .
C70 C 0.3828(8) 0.5537(5) 0.1012(3) 0.0345(18) Uani 1 1 d . . . . .
C71 C 0.3598(8) 0.6153(5) 0.0547(3) 0.039(2) Uani 1 1 d . . . . .
C72 C 0.4800(11) 0.6979(8) 0.0700(4) 0.028(4) Uani 0.76(3) 1 d . . P . .
C72A C 0.424(3) 0.726(2) 0.0572(11) 0.010(9) Uiso 0.24(3) 1 d . . P . .
C73 C 0.4784(10) 0.7877(7) 0.0605(4) 0.027(4) Uani 0.76(3) 1 d . . P . .
C73A C 0.522(3) 0.755(2) 0.0817(14) 0.014(9) Uiso 0.24(3) 1 d . . P . .
C74 C 0.3531(8) 0.8093(5) 0.0395(4) 0.0359(19) Uani 1 1 d . . . . .
C75 C 0.3666(8) 0.9042(5) 0.0772(3) 0.0345(19) Uani 1 1 d . . . . .
C76 C 0.4891(8) 0.9401(5) 0.1044(4) 0.0368(19) Uani 1 1 d . . . . .
C77 C 0.5111(8) 1.0128(5) 0.1508(4) 0.037(2) Uani 1 1 d . . . . .
C78 C 0.6279(7) 1.0273(5) 0.1919(4) 0.0341(19) Uani 1 1 d . . . . .
C79 C 0.6542(7) 0.9297(5) 0.1996(4) 0.0330(18) Uani 1 1 d . . . . .
C80 C 0.6675(7) 0.9129(5) 0.2577(4) 0.0330(18) Uani 1 1 d . . . . .
C81 C 0.6688(7) 0.9954(5) 0.3032(4) 0.0347(19) Uani 1 1 d . . . . .
C82 C 0.5949(8) 0.9647(5) 0.3562(4) 0.038(2) Uani 1 1 d . . . . .
C83 C 0.5855(7) 0.8718(5) 0.3736(4) 0.0336(18) Uani 1 1 d . . . . .
C84 C 0.6244(7) 0.7991(4) 0.3329(3) 0.0276(16) Uani 1 1 d . . . . .
C85 C 0.5926(6) 0.7033(4) 0.3447(3) 0.0211(15) Uani 1 1 d . . . . .
C86 C 0.5348(6) 0.6718(4) 0.4013(3) 0.0220(15) Uani 1 1 d . . . . .
C87 C 0.4534(7) 0.5705(4) 0.3807(3) 0.0240(16) Uani 1 1 d . . . . .
C88 C 0.4942(7) 0.5347(4) 0.3215(3) 0.0252(16) Uani 1 1 d . . . . .
C89 C 0.5731(6) 0.6261(4) 0.2990(3) 0.0217(15) Uani 1 1 d . . . . .
C90 C 0.5812(7) 0.6402(4) 0.2402(3) 0.0240(15) Uani 1 1 d . . . . .
C91 C 0.5129(8) 0.5585(6) 0.1946(3) 0.045(2) Uani 1 1 d . . . . .
C92 C 0.4904(8) 0.5895(5) 0.1369(3) 0.0340(18) Uani 1 1 d . . . . .
C93 C 0.5766(7) 0.6817(5) 0.1168(3) 0.0314(17) Uani 1 1 d . . . . .
C94 C 0.6180(7) 0.7604(5) 0.1660(3) 0.0293(17) Uani 1 1 d . . . . .
C95 C 0.6296(8) 0.8542(5) 0.1530(4) 0.0365(19) Uani 1 1 d . . . . .
C96 C 0.5767(8) 0.8714(5) 0.0934(3) 0.0374(19) Uani 1 1 d . . . . .
C97 C 0.6262(7) 0.7389(5) 0.2258(3) 0.0295(17) Uani 1 1 d . . . . .
C98 C 0.6517(7) 0.8160(5) 0.2725(3) 0.0305(17) Uani 1 1 d . . . . .
 
loop_
 _atom_site_aniso_label
 _atom_site_aniso_U_11
 _atom_site_aniso_U_22
 _atom_site_aniso_U_33
 _atom_site_aniso_U_23
 _atom_site_aniso_U_13
 _atom_site_aniso_U_12
Cl1 0.0484(13) 0.0216(8) 0.0594(14) 0.0208(9) -0.0050(10) 0.0091(8)
Cl2 0.0530(14) 0.0193(8) 0.0425(12) 0.0015(8) -0.0009(9) 0.0138(8)
Cl3 0.0507(13) 0.0291(9) 0.0357(11) 0.0045(8) 0.0052(9) 0.0167(8)
Cl4 0.0449(13) 0.0318(9) 0.0352(11) 0.0104(8) 0.0085(8) 0.0117(8)
Cl5 0.0404(12) 0.0153(7) 0.0434(11) 0.0127(7) -0.0027(8) -0.0080(7)
Cl6 0.0387(12) 0.0158(8) 0.0432(11) 0.0076(7) -0.0064(8) -0.0070(7)
Cl7 0.0614(15) 0.0350(10) 0.0326(11) -0.0001(8) -0.0017(10) -0.0164(9)
Cl8 0.0373(13) 0.0340(9) 0.0427(12) 0.0225(8) -0.0061(9) 0.0040(8)
Cl9 0.0498(13) 0.0159(8) 0.0537(13) 0.0163(8) -0.0111(9) 0.0007(7)
Cl10 0.0492(13) 0.0107(7) 0.0478(12) 0.0045(7) -0.0100(9) 0.0030(7)
Cl11 0.0464(12) 0.0210(8) 0.0286(10) 0.0115(7) -0.0004(8) 0.0089(7)
Cl12 0.0373(11) 0.0136(7) 0.0365(10) 0.0133(7) 0.0010(8) 0.0041(6)
Cl13 0.037(2) 0.0155(12) 0.0314(17) 0.0068(11) -0.0018(12) 0.0048(10)
Cl14 0.0435(13) 0.0304(9) 0.0300(10) 0.0039(8) -0.0013(8) 0.0045(8)
Cl15 0.0456(13) 0.0354(10) 0.0337(11) 0.0183(8) -0.0018(9) 0.0030(8)
Cl16 0.0374(12) 0.0207(8) 0.0413(11) 0.0159(7) -0.0029(8) -0.0067(7)
Cl17 0.0328(11) 0.0196(8) 0.0427(11) 0.0115(7) -0.0035(8) -0.0003(7)
Cl18 0.0353(11) 0.0168(7) 0.0311(10) 0.0057(7) -0.0054(7) 0.0075(6)
Cl19 0.0338(11) 0.0142(7) 0.0343(10) 0.0070(7) -0.0003(8) 0.0071(6)
Cl20 0.0362(19) 0.0161(12) 0.0308(16) 0.0071(11) 0.0006(12) 0.0048(10)
Cl21 0.0354(12) 0.0304(9) 0.0382(11) 0.0053(8) 0.0003(8) 0.0058(7)
Cl22 0.0378(13) 0.0367(10) 0.0348(11) 0.0128(8) 0.0039(8) -0.0059(8)
C1 0.023(5) 0.023(3) 0.047(5) 0.014(3) 0.003(3) 0.009(3)
C2 0.016(4) 0.029(4) 0.040(4) 0.013(3) 0.001(3) 0.007(3)
C3 0.020(4) 0.025(3) 0.034(4) 0.011(3) 0.003(3) 0.006(3)
C4 0.028(5) 0.020(3) 0.038(4) 0.012(3) -0.007(3) 0.005(3)
C5 0.021(4) 0.025(3) 0.032(4) 0.010(3) -0.006(3) 0.007(3)
C6 0.026(5) 0.027(4) 0.038(4) 0.012(3) 0.001(3) 0.014(3)
C7 0.039(5) 0.022(3) 0.036(4) 0.008(3) -0.004(3) 0.016(3)
C8 0.046(5) 0.020(3) 0.046(5) 0.014(3) 0.005(4) 0.012(3)
C9 0.042(5) 0.019(3) 0.027(4) 0.006(3) -0.002(3) 0.008(3)
C10 0.031(5) 0.021(3) 0.042(5) 0.009(3) 0.003(3) 0.010(3)
C11 0.037(5) 0.025(3) 0.032(4) 0.009(3) 0.005(3) 0.019(3)
C12 0.023(5) 0.029(4) 0.040(4) 0.019(3) 0.014(3) 0.014(3)
C13 0.024(5) 0.023(3) 0.040(5) 0.011(3) 0.005(3) 0.004(3)
C14 0.026(5) 0.025(3) 0.031(4) 0.015(3) 0.007(3) 0.003(3)
C15 0.020(4) 0.024(3) 0.032(4) 0.014(3) 0.005(3) -0.010(3)
C16 0.021(4) 0.022(3) 0.035(4) 0.013(3) 0.002(3) 0.000(3)
C17 0.022(4) 0.015(3) 0.039(4) 0.008(3) 0.002(3) -0.007(3)
C18 0.018(4) 0.018(3) 0.034(4) 0.012(3) -0.004(3) -0.004(2)
C19 0.025(4) 0.019(3) 0.033(4) 0.009(3) 0.001(3) 0.000(3)
C20 0.042(5) 0.020(3) 0.033(4) 0.009(3) -0.005(3) 0.006(3)
C21 0.046(5) 0.016(3) 0.030(4) 0.012(3) -0.001(3) -0.001(3)
C22 0.020(4) 0.022(3) 0.033(4) 0.006(3) -0.005(3) -0.001(3)
C23 0.039(5) 0.025(4) 0.035(4) 0.015(3) -0.015(3) 0.008(3)
C24 0.042(5) 0.022(3) 0.036(5) 0.013(3) -0.007(3) 0.012(3)
C25 0.043(5) 0.023(3) 0.044(5) 0.016(3) -0.003(4) 0.012(3)
C26 0.057(6) 0.018(3) 0.044(5) 0.009(3) 0.005(4) 0.006(3)
C27 0.051(6) 0.022(4) 0.058(6) 0.013(4) -0.011(4) -0.015(3)
C28 0.068(7) 0.016(3) 0.044(5) 0.007(3) -0.009(4) -0.010(3)
C29 0.063(6) 0.021(4) 0.029(4) -0.001(3) -0.003(4) 0.006(3)
C30 0.041(5) 0.023(4) 0.038(5) 0.011(3) 0.004(3) 0.007(3)
C31 0.037(5) 0.022(3) 0.031(4) 0.006(3) 0.000(3) 0.006(3)
C32 0.023(5) 0.022(3) 0.033(4) 0.003(3) -0.008(3) 0.008(3)
C33 0.025(4) 0.023(3) 0.026(4) 0.009(3) -0.002(3) 0.007(3)
C34 0.037(5) 0.017(3) 0.037(4) 0.010(3) 0.003(3) 0.008(3)
C35 0.030(5) 0.022(3) 0.032(4) 0.014(3) 0.008(3) 0.004(3)
C36 0.026(5) 0.023(3) 0.031(4) 0.015(3) 0.010(3) 0.006(3)
C37 0.023(4) 0.014(3) 0.034(4) 0.014(3) 0.002(3) 0.005(3)
C38 0.025(4) 0.015(3) 0.038(4) 0.015(3) 0.006(3) -0.002(3)
C39 0.018(4) 0.016(3) 0.041(4) 0.012(3) -0.007(3) -0.003(2)
C40 0.023(4) 0.010(3) 0.032(4) 0.009(3) 0.000(3) -0.002(2)
C41 0.039(5) 0.009(3) 0.035(4) 0.009(3) -0.002(3) 0.005(3)
C42 0.027(4) 0.010(3) 0.038(4) 0.007(3) -0.003(3) -0.002(2)
C43 0.025(5) 0.012(3) 0.036(4) 0.010(3) -0.002(3) -0.004(2)
C44 0.059(6) 0.016(3) 0.029(4) 0.007(3) 0.000(4) 0.000(3)
C45 0.059(6) 0.029(4) 0.040(5) 0.013(4) 0.007(4) 0.007(4)
C46 0.066(6) 0.017(3) 0.035(5) 0.015(3) 0.015(4) 0.006(3)
C47 0.050(6) 0.023(4) 0.027(4) 0.010(3) 0.000(3) 0.007(3)
C48 0.044(5) 0.021(3) 0.032(4) 0.014(3) -0.005(3) 0.004(3)
C49 0.041(5) 0.029(4) 0.038(5) 0.020(3) -0.006(4) 0.000(3)
C50 0.024(5) 0.026(4) 0.047(5) 0.018(3) -0.009(3) 0.005(3)
C51 0.039(6) 0.022(4) 0.068(6) 0.024(4) 0.005(4) 0.006(3)
C52 0.055(6) 0.012(3) 0.063(6) 0.013(3) -0.024(4) -0.006(3)
C55 0.062(6) 0.015(3) 0.046(5) 0.000(3) 0.008(4) -0.013(3)
C56 0.034(5) 0.015(3) 0.074(6) 0.007(4) 0.008(4) 0.002(3)
C57 0.034(5) 0.017(3) 0.048(5) 0.004(3) 0.004(4) 0.005(3)
C58 0.023(5) 0.015(3) 0.046(5) 0.003(3) 0.000(3) 0.004(3)
C59 0.041(5) 0.016(3) 0.027(4) 0.002(3) -0.002(3) 0.005(3)
C60 0.030(5) 0.011(3) 0.036(4) 0.005(3) 0.001(3) 0.008(3)
C61 0.033(5) 0.014(3) 0.026(4) 0.001(3) 0.006(3) 0.001(3)
C62 0.035(5) 0.014(3) 0.028(4) 0.008(3) 0.002(3) 0.002(3)
C63 0.035(5) 0.012(3) 0.024(4) 0.009(3) 0.002(3) 0.009(3)
C64 0.037(5) 0.013(3) 0.022(4) 0.009(3) -0.007(3) 0.005(3)
C65 0.016(4) 0.010(3) 0.038(4) 0.010(3) -0.004(3) 0.000(2)
C66 0.036(5) 0.012(3) 0.022(4) 0.003(3) 0.001(3) -0.001(3)
C67 0.030(5) 0.022(3) 0.021(4) 0.001(3) -0.008(3) 0.001(3)
C68 0.040(5) 0.019(3) 0.028(4) 0.005(3) 0.003(3) 0.004(3)
C69 0.046(6) 0.057(5) 0.033(5) 0.028(4) 0.001(4) -0.012(4)
C70 0.045(6) 0.034(4) 0.021(4) 0.004(3) 0.003(3) 0.001(3)
C71 0.058(6) 0.026(4) 0.025(4) 0.008(3) 0.004(4) -0.008(3)
C72 0.055(8) 0.010(6) 0.017(5) 0.005(4) 0.001(4) 0.006(5)
C73 0.037(7) 0.017(6) 0.025(5) 0.011(4) 0.010(4) -0.004(4)
C74 0.031(5) 0.042(4) 0.040(5) 0.015(4) 0.002(3) 0.016(3)
C75 0.028(5) 0.035(4) 0.041(5) 0.022(4) 0.001(4) 0.002(3)
C76 0.042(6) 0.031(4) 0.041(5) 0.019(4) 0.008(4) 0.009(3)
C77 0.040(6) 0.016(3) 0.052(5) 0.010(3) -0.004(4) -0.003(3)
C78 0.031(5) 0.017(3) 0.046(5) 0.010(3) 0.005(4) -0.013(3)
C79 0.026(5) 0.022(3) 0.048(5) 0.014(3) -0.003(3) -0.005(3)
C80 0.031(5) 0.020(3) 0.046(5) 0.017(3) -0.002(3) -0.003(3)
C81 0.025(5) 0.021(3) 0.057(5) 0.014(3) -0.007(4) 0.002(3)
C82 0.041(5) 0.012(3) 0.060(6) 0.014(3) 0.002(4) 0.002(3)
C83 0.036(5) 0.013(3) 0.053(5) 0.008(3) 0.002(4) 0.005(3)
C84 0.032(5) 0.017(3) 0.035(4) 0.012(3) -0.001(3) 0.005(3)
C85 0.018(4) 0.017(3) 0.031(4) 0.010(3) 0.001(3) 0.007(2)
C86 0.022(4) 0.016(3) 0.028(4) 0.010(3) -0.003(3) 0.004(3)
C87 0.031(5) 0.012(3) 0.029(4) 0.010(3) -0.005(3) 0.002(3)
C88 0.037(5) 0.013(3) 0.027(4) 0.010(3) -0.005(3) 0.007(3)
C89 0.016(4) 0.019(3) 0.032(4) 0.011(3) -0.005(3) 0.003(2)
C90 0.028(4) 0.016(3) 0.028(4) 0.007(3) 0.000(3) 0.003(3)
C91 0.054(6) 0.045(5) 0.026(4) 0.015(4) -0.006(4) -0.011(4)
C92 0.036(5) 0.037(4) 0.028(4) 0.011(3) 0.001(3) 0.005(3)
C93 0.033(5) 0.033(4) 0.030(4) 0.013(3) 0.005(3) 0.007(3)
C94 0.032(5) 0.021(3) 0.038(4) 0.009(3) 0.011(3) 0.010(3)
C95 0.042(5) 0.022(4) 0.044(5) 0.018(3) 0.009(4) 0.000(3)
C96 0.043(5) 0.032(4) 0.030(4) 0.007(3) 0.010(3) -0.007(3)
C97 0.025(5) 0.024(3) 0.042(5) 0.020(3) 0.007(3) 0.003(3)
C98 0.032(5) 0.023(3) 0.035(4) 0.014(3) -0.006(3) -0.002(3)
 
_geom_special_details
;
 All esds (except the esd in the dihedral angle between two l.s. planes)
 are estimated using the full covariance matrix.  The cell esds are taken
 into account individually in the estimation of esds in distances, angles
 and torsion angles; correlations between esds in cell parameters are only
 used when they are defined by crystal symmetry.  An approximate (isotropic)
 treatment of cell esds is used for estimating esds involving l.s. planes.
;
 
loop_
 _geom_bond_atom_site_label_1
 _geom_bond_atom_site_label_2
 _geom_bond_distance
 _geom_bond_site_symmetry_2
 _geom_bond_publ_flag
Cl1 C25 1.821(7) . ?
Cl2 C30 1.810(7) . ?
Cl3 C31 1.796(8) . ?
Cl4 C34 1.814(8) . ?
Cl5 C39 1.811(6) . ?
Cl6 C42 1.809(6) . ?
Cl7 C43 1.786(7) . ?
Cl8 C48 1.809(7) . ?
Cl9 C52 1.822(7) . ?
Cl10 C55 1.822(7) . ?
Cl11 C62 1.828(7) . ?
Cl12 C64 1.830(6) . ?
Cl13 C69 1.947(10) . ?
Cl14 C71 1.802(8) . ?
Cl15 C74 1.824(8) . ?
Cl16 C78 1.825(7) . ?
Cl17 C81 1.839(8) . ?
Cl18 C86 1.826(7) . ?
Cl19 C88 1.837(6) . ?
Cl20 C91 1.983(10) . ?
Cl21 C93 1.815(8) . ?
Cl22 C96 1.823(7) . ?
C1 C10 1.434(10) . ?
C1 C2 1.442(9) . ?
C1 C6 1.445(10) . ?
C2 C13 1.395(10) . ?
C2 C3 1.471(10) . ?
C3 C16 1.419(9) . ?
C3 C4 1.425(10) . ?
C4 C19 1.431(10) . ?
C4 C5 1.462(8) . ?
C5 C22 1.397(9) . ?
C5 C6 1.425(10) . ?
C6 C7 1.412(9) . ?
C7 C24 1.407(10) . ?
C7 C8 1.432(11) . ?
C8 C9 1.395(10) . ?
C8 C26 1.404(10) . ?
C9 C29 1.396(11) . ?
C9 C10 1.476(9) . ?
C10 C11 1.422(10) . ?
C11 C12 1.390(9) . ?
C11 C31 1.529(10) . ?
C12 C13 1.422(10) . ?
C12 C34 1.535(9) . ?
C13 C14 1.448(9) . ?
C14 C15 1.369(10) . ?
C14 C35 1.393(10) . ?
C15 C38 1.422(10) . ?
C15 C16 1.433(9) . ?
C16 C17 1.402(10) . ?
C17 C18 1.370(9) . ?
C17 C39 1.574(9) . ?
C18 C19 1.431(8) . ?
C18 C42 1.525(10) . ?
C19 C20 1.454(10) . ?
C20 C44 1.411(11) . ?
C20 C21 1.414(9) . ?
C21 C47 1.404(10) . ?
C21 C22 1.425(10) . ?
C22 C23 1.428(9) . ?
C23 C24 1.347(10) . ?
C23 C48 1.506(11) . ?
C24 C25 1.524(10) . ?
C25 C50 1.494(11) . ?
C25 C26 1.524(11) . ?
C26 C27 1.358(11) . ?
C27 C28 1.417(11) . ?
C27 C52 1.510(13) . ?
C28 C29 1.417(11) . ?
C28 C55 1.496(13) . ?
C29 C30 1.516(10) . ?
C30 C57 1.502(11) . ?
C30 C31 1.586(9) . ?
C31 C32 1.516(9) . ?
C32 C33 1.373(9) . ?
C32 C58 1.413(10) . ?
C33 C61 1.435(9) . ?
C33 C34 1.528(10) . ?
C34 C35 1.502(9) . ?
C35 C36 1.390(9) . ?
C36 C37 1.418(10) . ?
C36 C62 1.481(10) . ?
C37 C38 1.371(10) . ?
C37 C64 1.490(10) . ?
C38 C39 1.515(10) . ?
C39 C40 1.503(10) . ?
C40 C41 1.357(9) . ?
C40 C65 1.431(9) . ?
C41 C68 1.388(10) . ?
C41 C42 1.529(10) . ?
C42 C43 1.583(9) . ?
C43 C44 1.510(8) . ?
C43 C69 1.552(11) . ?
C44 C45 1.413(11) . ?
C45 C46 1.421(10) . ?
C45 C71 1.507(12) . ?
C46 C47 1.338(11) . ?
C46 C74 1.523(11) . ?
C47 C48 1.524(9) . ?
C48 C49 1.527(10) . ?
C49 C75 1.398(11) . ?
C49 C50 1.399(11) . ?
C50 C51 1.412(11) . ?
C51 C77 1.394(11) . ?
C51 C52 1.524(12) . ?
C52 C53A 1.521(14) . ?
C52 C53 1.68(2) . ?
C53 C54A 0.795(17) . ?
C53 C53A 0.972(18) . ?
C53 C54 1.24(3) . ?
C53 C78 1.51(2) . ?
C53A C54 0.996(17) . ?
C53A C54A 1.33(2) . ?
C53A C55 1.525(15) . ?
C54 C54A 0.892(16) . ?
C54 C81 1.527(16) . ?
C54 C55 1.617(18) . ?
C54A C78 1.522(15) . ?
C54A C81 1.554(14) . ?
C55 C56 1.520(11) . ?
C56 C57 1.346(11) . ?
C56 C82 1.421(11) . ?
C57 C58 1.402(9) . ?
C58 C59 1.399(10) . ?
C59 C60 1.434(8) . ?
C59 C83 1.438(10) . ?
C60 C61 1.371(9) . ?
C60 C86 1.524(9) . ?
C61 C62 1.538(8) . ?
C62 C63 1.509(10) . ?
C63 C87 1.324(9) . ?
C63 C64 1.529(9) . ?
C64 C65 1.513(9) . ?
C65 C66 1.408(9) . ?
C66 C67 1.397(9) . ?
C66 C88 1.510(9) . ?
C67 C68 1.403(10) . ?
C67 C91 1.483(10) . ?
C68 C69 1.453(10) . ?
C69 C70 1.464(10) . ?
C70 C92 1.356(11) . ?
C70 C71 1.493(10) . ?
C71 C72 1.528(13) . ?
C71 C72A 1.57(3) . ?
C72 C73A 0.84(3) . ?
C72 C72A 0.86(3) . ?
C72 C73 1.329(19) . ?
C72 C93 1.538(13) . ?
C72A C73 0.92(3) . ?
C72A C73A 1.14(5) . ?
C72A C74 1.63(3) . ?
C73 C73A 0.90(3) . ?
C73 C96 1.512(12) . ?
C73 C74 1.517(14) . ?
C73A C93 1.58(3) . ?
C73A C96 1.63(3) . ?
C74 C75 1.504(11) . ?
C75 C76 1.391(11) . ?
C76 C77 1.376(11) . ?
C76 C96 1.512(11) . ?
C77 C78 1.502(11) . ?
C78 C79 1.516(10) . ?
C79 C80 1.370(10) . ?
C79 C95 1.404(11) . ?
C80 C98 1.431(9) . ?
C80 C81 1.483(11) . ?
C81 C82 1.484(11) . ?
C82 C83 1.407(8) . ?
C83 C84 1.456(10) . ?
C84 C85 1.386(8) . ?
C84 C98 1.429(10) . ?
C85 C89 1.409(9) . ?
C85 C86 1.487(9) . ?
C86 C87 1.524(8) . ?
C87 C88 1.489(10) . ?
C88 C89 1.513(8) . ?
C89 C90 1.364(9) . ?
C90 C97 1.450(8) . ?
C90 C91 1.514(10) . ?
C91 C92 1.454(10) . ?
C92 C93 1.528(10) . ?
C93 C94 1.483(10) . ?
C94 C95 1.381(9) . ?
C94 C97 1.421(10) . ?
C95 C96 1.519(11) . ?
C97 C98 1.422(10) . ?
 
loop_
 _geom_angle_atom_site_label_1
 _geom_angle_atom_site_label_2
 _geom_angle_atom_site_label_3
 _geom_angle
 _geom_angle_site_symmetry_1
 _geom_angle_site_symmetry_3
 _geom_angle_publ_flag
C10 C1 C2 120.3(6) . . ?
C10 C1 C6 121.7(6) . . ?
C2 C1 C6 116.7(7) . . ?
C13 C2 C1 117.2(7) . . ?
C13 C2 C3 118.2(6) . . ?
C1 C2 C3 119.9(6) . . ?
C16 C3 C4 116.5(6) . . ?
C16 C3 C2 118.2(6) . . ?
C4 C3 C2 121.2(6) . . ?
C3 C4 C19 120.9(6) . . ?
C3 C4 C5 116.1(6) . . ?
C19 C4 C5 121.1(6) . . ?
C22 C5 C6 118.3(6) . . ?
C22 C5 C4 116.9(6) . . ?
C6 C5 C4 121.3(6) . . ?
C7 C6 C5 117.2(6) . . ?
C7 C6 C1 118.2(7) . . ?
C5 C6 C1 121.0(6) . . ?
C24 C7 C6 123.5(7) . . ?
C24 C7 C8 109.0(6) . . ?
C6 C7 C8 119.6(6) . . ?
C9 C8 C26 123.4(8) . . ?
C9 C8 C7 122.5(6) . . ?
C26 C8 C7 108.2(7) . . ?
C8 C9 C29 116.6(7) . . ?
C8 C9 C10 118.3(7) . . ?
C29 C9 C10 122.3(6) . . ?
C11 C10 C1 120.5(6) . . ?
C11 C10 C9 118.5(7) . . ?
C1 C10 C9 117.6(6) . . ?
C12 C11 C10 118.5(7) . . ?
C12 C11 C31 115.6(6) . . ?
C10 C11 C31 123.7(6) . . ?
C11 C12 C13 121.2(6) . . ?
C11 C12 C34 124.9(7) . . ?
C13 C12 C34 108.8(6) . . ?
C2 C13 C12 122.0(6) . . ?
C2 C13 C14 122.8(7) . . ?
C12 C13 C14 108.4(6) . . ?
C15 C14 C35 121.0(6) . . ?
C15 C14 C13 118.6(6) . . ?
C35 C14 C13 109.0(6) . . ?
C14 C15 C38 119.8(7) . . ?
C14 C15 C16 121.0(6) . . ?
C38 C15 C16 109.0(6) . . ?
C17 C16 C3 121.4(6) . . ?
C17 C16 C15 110.5(6) . . ?
C3 C16 C15 121.2(7) . . ?
C18 C17 C16 122.8(6) . . ?
C18 C17 C39 123.0(6) . . ?
C16 C17 C39 108.1(6) . . ?
C17 C18 C19 117.7(6) . . ?
C17 C18 C42 117.3(6) . . ?
C19 C18 C42 123.5(6) . . ?
C4 C19 C18 120.2(6) . . ?
C4 C19 C20 119.1(6) . . ?
C18 C19 C20 117.2(6) . . ?
C44 C20 C21 117.0(7) . . ?
C44 C20 C19 123.4(6) . . ?
C21 C20 C19 117.3(7) . . ?
C47 C21 C20 122.1(7) . . ?
C47 C21 C22 109.9(6) . . ?
C20 C21 C22 121.7(6) . . ?
C5 C22 C21 121.2(6) . . ?
C5 C22 C23 122.5(7) . . ?
C21 C22 C23 108.2(6) . . ?
C24 C23 C22 119.5(7) . . ?
C24 C23 C48 123.1(7) . . ?
C22 C23 C48 109.9(6) . . ?
C23 C24 C7 119.0(6) . . ?
C23 C24 C25 121.8(7) . . ?
C7 C24 C25 111.1(6) . . ?
C50 C25 C24 110.6(6) . . ?
C50 C25 C26 111.7(6) . . ?
C24 C25 C26 99.7(6) . . ?
C50 C25 Cl1 110.8(5) . . ?
C24 C25 Cl1 112.0(5) . . ?
C26 C25 Cl1 111.5(5) . . ?
C27 C26 C8 119.0(8) . . ?
C27 C26 C25 122.7(8) . . ?
C8 C26 C25 111.7(7) . . ?
C26 C27 C28 119.7(8) . . ?
C26 C27 C52 120.7(8) . . ?
C28 C27 C52 115.0(8) . . ?
C27 C28 C29 119.9(8) . . ?
C27 C28 C55 114.1(8) . . ?
C29 C28 C55 123.5(7) . . ?
C9 C29 C28 120.2(7) . . ?
C9 C29 C30 122.3(7) . . ?
C28 C29 C30 116.0(7) . . ?
C57 C30 C29 107.3(7) . . ?
C57 C30 C31 104.1(5) . . ?
C29 C30 C31 116.0(6) . . ?
C57 C30 Cl2 112.3(5) . . ?
C29 C30 Cl2 104.7(5) . . ?
C31 C30 Cl2 112.5(5) . . ?
C32 C31 C11 105.2(5) . . ?
C32 C31 C30 103.8(6) . . ?
C11 C31 C30 115.5(6) . . ?
C32 C31 Cl3 109.7(5) . . ?
C11 C31 Cl3 108.7(5) . . ?
C30 C31 Cl3 113.3(5) . . ?
C33 C32 C58 119.8(6) . . ?
C33 C32 C31 126.7(6) . . ?
C58 C32 C31 110.3(6) . . ?
C32 C33 C61 119.6(6) . . ?
C32 C33 C34 115.4(6) . . ?
C61 C33 C34 122.2(6) . . ?
C35 C34 C33 111.5(6) . . ?
C35 C34 C12 101.9(6) . . ?
C33 C34 C12 107.3(5) . . ?
C35 C34 Cl4 109.0(5) . . ?
C33 C34 Cl4 111.1(5) . . ?
C12 C34 Cl4 115.7(5) . . ?
C36 C35 C14 119.3(7) . . ?
C36 C35 C34 123.0(6) . . ?
C14 C35 C34 110.2(6) . . ?
C35 C36 C37 119.7(7) . . ?
C35 C36 C62 122.3(6) . . ?
C37 C36 C62 111.6(6) . . ?
C38 C37 C36 120.0(6) . . ?
C38 C37 C64 121.1(6) . . ?
C36 C37 C64 112.1(6) . . ?
C37 C38 C15 119.4(6) . . ?
C37 C38 C39 123.1(6) . . ?
C15 C38 C39 109.5(6) . . ?
C40 C39 C38 111.5(5) . . ?
C40 C39 C17 106.3(5) . . ?
C38 C39 C17 101.5(5) . . ?
C40 C39 Cl5 113.3(5) . . ?
C38 C39 Cl5 108.6(4) . . ?
C17 C39 Cl5 115.1(5) . . ?
C41 C40 C65 119.5(6) . . ?
C41 C40 C39 117.0(6) . . ?
C65 C40 C39 122.0(6) . . ?
C40 C41 C68 121.3(6) . . ?
C40 C41 C42 126.1(6) . . ?
C68 C41 C42 109.8(6) . . ?
C18 C42 C41 103.8(6) . . ?
C18 C42 C43 116.7(5) . . ?
C41 C42 C43 104.9(5) . . ?
C18 C42 Cl6 107.1(5) . . ?
C41 C42 Cl6 111.9(4) . . ?
C43 C42 Cl6 112.2(5) . . ?
C44 C43 C69 111.6(6) . . ?
C44 C43 C42 114.6(6) . . ?
C69 C43 C42 103.4(5) . . ?
C44 C43 Cl7 103.6(5) . . ?
C69 C43 Cl7 110.6(5) . . ?
C42 C43 Cl7 113.2(4) . . ?
C20 C44 C45 119.0(6) . . ?
C20 C44 C43 121.3(6) . . ?
C45 C44 C43 119.4(7) . . ?
C44 C45 C46 121.1(8) . . ?
C44 C45 C71 121.2(7) . . ?
C46 C45 C71 116.2(7) . . ?
C47 C46 C45 119.1(7) . . ?
C47 C46 C74 118.3(6) . . ?
C45 C46 C74 119.8(8) . . ?
C46 C47 C21 120.6(6) . . ?
C46 C47 C48 125.4(7) . . ?
C21 C47 C48 109.2(7) . . ?
C23 C48 C47 101.9(5) . . ?
C23 C48 C49 109.9(6) . . ?
C47 C48 C49 109.8(6) . . ?
C23 C48 Cl8 113.1(5) . . ?
C47 C48 Cl8 110.4(5) . . ?
C49 C48 Cl8 111.4(5) . . ?
C75 C49 C50 119.7(7) . . ?
C75 C49 C48 116.9(7) . . ?
C50 C49 C48 121.6(7) . . ?
C49 C50 C51 119.7(7) . . ?
C49 C50 C25 121.0(7) . . ?
C51 C50 C25 118.1(7) . . ?
C77 C51 C50 119.8(8) . . ?
C77 C51 C52 115.3(7) . . ?
C50 C51 C52 123.3(8) . . ?
C27 C52 C53A 92.3(8) . . ?
C27 C52 C51 110.3(6) . . ?
C53A C52 C51 120.1(8) . . ?
C27 C52 C53 122.3(9) . . ?
C53A C52 C53 34.9(7) . . ?
C51 C52 C53 90.6(8) . . ?
C27 C52 Cl9 111.7(6) . . ?
C53A C52 Cl9 112.0(6) . . ?
C51 C52 Cl9 109.4(5) . . ?
C53 C52 Cl9 110.3(7) . . ?
C54A C53 C53A 97(3) . . ?
C54A C53 C54 45.8(17) . . ?
C53A C53 C54 51.8(14) . . ?
C54A C53 C78 75.8(18) . . ?
C53A C53 C78 166.9(19) . . ?
C54 C53 C78 121.4(16) . . ?
C54A C53 C52 157(2) . . ?
C53A C53 C52 63.6(14) . . ?
C54 C53 C52 114.9(15) . . ?
C78 C53 C52 119.7(13) . . ?
C53 C53A C54 78(2) . . ?
C53 C53A C54A 36.3(13) . . ?
C54 C53A C54A 42.0(12) . . ?
C53 C53A C52 81.4(15) . . ?
C54 C53A C52 157.6(17) . . ?
C54A C53A C52 116.5(11) . . ?
C53 C53A C55 154.1(19) . . ?
C54 C53A C55 76.6(13) . . ?
C54A C53A C55 118.0(11) . . ?
C52 C53A C55 122.3(10) . . ?
C54A C54 C53A 90(2) . . ?
C54A C54 C53 39.7(13) . . ?
C53A C54 C53 50.1(13) . . ?
C54A C54 C81 74.9(14) . . ?
C53A C54 C81 158.4(17) . . ?
C53 C54 C81 114.0(15) . . ?
C54A C54 C55 154.2(19) . . ?
C53A C54 C55 66.6(12) . . ?
C53 C54 C55 116.5(15) . . ?
C81 C54 C55 124.7(11) . . ?
C53 C54A C54 94(3) . . ?
C53 C54A C53A 46.4(18) . . ?
C54 C54A C53A 48.4(13) . . ?
C53 C54A C78 73.8(18) . . ?
C54 C54A C78 167.0(19) . . ?
C53A C54A C78 119.3(11) . . ?
C53 C54A C81 163(2) . . ?
C54 C54A C81 71.5(13) . . ?
C53A C54A C81 118.2(11) . . ?
C78 C54A C81 119.0(10) . . ?
C28 C55 C56 108.9(6) . . ?
C28 C55 C53A 92.7(8) . . ?
C56 C55 C53A 120.9(8) . . ?
C28 C55 C54 122.3(9) . . ?
C56 C55 C54 88.7(8) . . ?
C53A C55 C54 36.8(7) . . ?
C28 C55 Cl10 114.8(6) . . ?
C56 C55 Cl10 110.5(6) . . ?
C53A C55 Cl10 108.2(6) . . ?
C54 C55 Cl10 108.4(7) . . ?
C57 C56 C82 119.9(6) . . ?
C57 C56 C55 118.6(7) . . ?
C82 C56 C55 117.3(7) . . ?
C56 C57 C58 120.0(7) . . ?
C56 C57 C30 124.5(7) . . ?
C58 C57 C30 111.1(6) . . ?
C59 C58 C57 122.6(7) . . ?
C59 C58 C32 121.8(6) . . ?
C57 C58 C32 110.6(6) . . ?
C58 C59 C60 116.8(6) . . ?
C58 C59 C83 117.6(6) . . ?
C60 C59 C83 123.1(6) . . ?
C61 C60 C59 121.3(6) . . ?
C61 C60 C86 121.5(5) . . ?
C59 C60 C86 116.3(6) . . ?
C60 C61 C33 120.0(6) . . ?
C60 C61 C62 120.7(6) . . ?
C33 C61 C62 118.5(6) . . ?
C36 C62 C63 101.5(6) . . ?
C36 C62 C61 112.2(5) . . ?
C63 C62 C61 111.6(5) . . ?
C36 C62 Cl11 112.3(5) . . ?
C63 C62 Cl11 111.7(4) . . ?
C61 C62 Cl11 107.6(5) . . ?
C87 C63 C62 123.0(6) . . ?
C87 C63 C64 120.5(6) . . ?
C62 C63 C64 112.3(6) . . ?
C37 C64 C65 113.0(5) . . ?
C37 C64 C63 100.4(5) . . ?
C65 C64 C63 111.3(5) . . ?
C37 C64 Cl12 113.9(4) . . ?
C65 C64 Cl12 107.9(4) . . ?
C63 C64 Cl12 110.2(4) . . ?
C66 C65 C40 118.1(6) . . ?
C66 C65 C64 122.0(6) . . ?
C40 C65 C64 119.0(6) . . ?
C67 C66 C65 122.2(6) . . ?
C67 C66 C88 117.8(6) . . ?
C65 C66 C88 119.0(6) . . ?
C66 C67 C68 116.8(6) . . ?
C66 C67 C91 123.5(6) . . ?
C68 C67 C91 118.2(6) . . ?
C41 C68 C67 121.5(7) . . ?
C41 C68 C69 111.8(7) . . ?
C67 C68 C69 125.2(7) . . ?
C68 C69 C70 112.8(7) . . ?
C68 C69 C43 107.0(7) . . ?
C70 C69 C43 116.4(7) . . ?
C68 C69 Cl13 103.7(5) . . ?
C70 C69 Cl13 107.0(6) . . ?
C43 C69 Cl13 109.2(5) . . ?
C92 C70 C69 120.8(7) . . ?
C92 C70 C71 116.1(6) . . ?
C69 C70 C71 120.7(7) . . ?
C70 C71 C45 109.7(6) . . ?
C70 C71 C72 96.9(7) . . ?
C45 C71 C72 114.8(7) . . ?
C70 C71 C72A 123.6(13) . . ?
C45 C71 C72A 87.2(13) . . ?
C72 C71 C72A 32.2(11) . . ?
C70 C71 Cl14 114.2(6) . . ?
C45 C71 Cl14 111.1(6) . . ?
C72 C71 Cl14 109.5(6) . . ?
C72A C71 Cl14 107.8(10) . . ?
C73A C72 C72A 84(4) . . ?
C73A C72 C73 42(2) . . ?
C72A C72 C73 44(2) . . ?
C73A C72 C71 157(3) . . ?
C72A C72 C71 77(2) . . ?
C73 C72 C71 120.1(11) . . ?
C73A C72 C93 77(3) . . ?
C72A C72 C93 154(2) . . ?
C73 C72 C93 119.4(9) . . ?
C71 C72 C93 116.5(8) . . ?
C72 C72A C73 96(4) . . ?
C72 C72A C73A 47(2) . . ?
C73 C72A C73A 51(2) . . ?
C72 C72A C71 71(2) . . ?
C73 C72A C71 167(4) . . ?
C73A C72A C71 118(3) . . ?
C72 C72A C74 163(3) . . ?
C73 C72A C74 66(2) . . ?
C73A C72A C74 115(3) . . ?
C71 C72A C74 126(2) . . ?
C73A C73 C72A 77(3) . . ?
C73A C73 C72 39(2) . . ?
C72A C73 C72 40(2) . . ?
C73A C73 C96 80(2) . . ?
C72A C73 C96 153(2) . . ?
C72 C73 C96 119.1(10) . . ?
C73A C73 C74 152(2) . . ?
C72A C73 C74 80(2) . . ?
C72 C73 C74 119.7(9) . . ?
C96 C73 C74 116.4(8) . . ?
C72 C73A C73 99(4) . . ?
C72 C73A C72A 49(2) . . ?
C73 C73A C72A 52(2) . . ?
C72 C73A C93 72(2) . . ?
C73 C73A C93 170(4) . . ?
C72A C73A C93 118(3) . . ?
C72 C73A C96 165(4) . . ?
C73 C73A C96 66(2) . . ?
C72A C73A C96 117(3) . . ?
C93 C73A C96 123(2) . . ?
C75 C74 C73 97.5(7) . . ?
C75 C74 C46 110.3(6) . . ?
C73 C74 C46 115.7(6) . . ?
C75 C74 C72A 122.8(11) . . ?
C73 C74 C72A 33.9(10) . . ?
C46 C74 C72A 84.5(12) . . ?
C75 C74 Cl15 111.2(5) . . ?
C73 C74 Cl15 110.8(6) . . ?
C46 C74 Cl15 110.6(6) . . ?
C72A C74 Cl15 113.9(10) . . ?
C76 C75 C49 119.6(8) . . ?
C76 C75 C74 113.3(7) . . ?
C49 C75 C74 124.5(7) . . ?
C77 C76 C75 121.4(7) . . ?
C77 C76 C96 122.6(7) . . ?
C75 C76 C96 112.8(7) . . ?
C76 C77 C51 119.7(7) . . ?
C76 C77 C78 119.6(7) . . ?
C51 C77 C78 118.0(7) . . ?
C77 C78 C53 94.0(9) . . ?
C77 C78 C79 109.0(6) . . ?
C53 C78 C79 120.2(9) . . ?
C77 C78 C54A 119.3(8) . . ?
C53 C78 C54A 30.4(7) . . ?
C79 C78 C54A 94.0(7) . . ?
C77 C78 Cl16 112.8(5) . . ?
C53 C78 Cl16 109.7(8) . . ?
C79 C78 Cl16 110.3(5) . . ?
C54A C78 Cl16 109.7(6) . . ?
C80 C79 C95 121.8(6) . . ?
C80 C79 C78 114.3(7) . . ?
C95 C79 C78 121.5(7) . . ?
C79 C80 C98 120.1(7) . . ?
C79 C80 C81 116.1(6) . . ?
C98 C80 C81 122.4(7) . . ?
C80 C81 C82 112.2(6) . . ?
C80 C81 C54 122.2(9) . . ?
C82 C81 C54 91.9(8) . . ?
C80 C81 C54A 93.1(7) . . ?
C82 C81 C54A 121.0(8) . . ?
C54 C81 C54A 33.6(6) . . ?
C80 C81 Cl17 110.3(5) . . ?
C82 C81 Cl17 109.7(6) . . ?
C54 C81 Cl17 109.0(7) . . ?
C54A C81 Cl17 109.4(6) . . ?
C83 C82 C56 121.3(7) . . ?
C83 C82 C81 120.5(7) . . ?
C56 C82 C81 116.4(6) . . ?
C82 C83 C59 118.4(7) . . ?
C82 C83 C84 119.3(7) . . ?
C59 C83 C84 117.1(6) . . ?
C85 C84 C98 116.4(6) . . ?
C85 C84 C83 119.4(6) . . ?
C98 C84 C83 120.5(6) . . ?
C84 C85 C89 122.0(6) . . ?
C84 C85 C86 123.0(6) . . ?
C89 C85 C86 112.1(5) . . ?
C85 C86 C87 101.6(5) . . ?
C85 C86 C60 111.4(5) . . ?
C87 C86 C60 111.5(6) . . ?
C85 C86 Cl18 111.0(5) . . ?
C87 C86 Cl18 111.0(4) . . ?
C60 C86 Cl18 110.0(5) . . ?
C63 C87 C88 124.4(6) . . ?
C63 C87 C86 121.9(6) . . ?
C88 C87 C86 110.8(6) . . ?
C87 C88 C66 112.7(6) . . ?
C87 C88 C89 102.9(5) . . ?
C66 C88 C89 110.6(5) . . ?
C87 C88 Cl19 110.3(4) . . ?
C66 C88 Cl19 109.8(4) . . ?
C89 C88 Cl19 110.2(5) . . ?
C90 C89 C85 122.6(5) . . ?
C90 C89 C88 123.6(6) . . ?
C85 C89 C88 109.7(6) . . ?
C89 C90 C97 117.4(6) . . ?
C89 C90 C91 118.5(6) . . ?
C97 C90 C91 122.3(6) . . ?
C92 C91 C67 114.1(7) . . ?
C92 C91 C90 113.8(6) . . ?
C67 C91 C90 111.8(6) . . ?
C92 C91 Cl20 105.1(6) . . ?
C67 C91 Cl20 105.7(5) . . ?
C90 C91 Cl20 105.4(5) . . ?
C70 C92 C91 125.4(7) . . ?
C70 C92 C93 112.6(6) . . ?
C91 C92 C93 120.9(7) . . ?
C94 C93 C92 113.3(6) . . ?
C94 C93 C72 116.1(7) . . ?
C92 C93 C72 96.8(6) . . ?
C94 C93 C73A 88.3(13) . . ?
C92 C93 C73A 123.1(13) . . ?
C72 C93 C73A 31.3(11) . . ?
C94 C93 Cl21 109.3(5) . . ?
C92 C93 Cl21 110.9(5) . . ?
C72 C93 Cl21 110.1(6) . . ?
C73A C93 Cl21 109.6(11) . . ?
C95 C94 C97 121.1(7) . . ?
C95 C94 C93 117.6(7) . . ?
C97 C94 C93 120.7(6) . . ?
C94 C95 C79 119.2(7) . . ?
C94 C95 C96 119.1(7) . . ?
C79 C95 C96 119.1(6) . . ?
C73 C96 C76 97.9(7) . . ?
C73 C96 C95 116.7(7) . . ?
C76 C96 C95 108.7(6) . . ?
C73 C96 C73A 33.2(11) . . ?
C76 C96 C73A 123.0(12) . . ?
C95 C96 C73A 86.5(13) . . ?
C73 C96 Cl22 110.4(6) . . ?
C76 C96 Cl22 112.7(5) . . ?
C95 C96 Cl22 110.0(6) . . ?
C73A C96 Cl22 112.3(10) . . ?
C94 C97 C98 119.1(6) . . ?
C94 C97 C90 120.2(7) . . ?
C98 C97 C90 119.3(6) . . ?
C97 C98 C84 121.4(6) . . ?
C97 C98 C80 118.7(6) . . ?
C84 C98 C80 117.4(7) . . ?
 
_refine_diff_density_max    0.639
_refine_diff_density_min   -0.682
_refine_diff_density_rms    0.121

_shelx_res_file
;

    FR121V1.res created by SHELXL-2014/7


TITL fr1333 in P-1
CELL 0.8950  10.613    14.315    22.588  95.820  90.535 103.840
ZERR    2.00   0.001   0.001   0.001   0.005   0.003   0.005
LATT  1
SFAC C CL
UNIT 196 42.51
OMIT 0
SHEL 20 0.76
OMIT   0  -1   1
OMIT  -1   1   0
OMIT  10  -8   9
OMIT   0   1   0
OMIT   1  -4   1
OMIT  -1   1   1
OMIT 0 1 1
OMIT -11 0 13
omit 9 -8 4
L.S. 4
BOND
FMAP 2
PLAN 20
acta 64.9
TEMP -173
SIZE 0.02 0.01 0.01
WGHT    0.080000    4.000000
FVAR       2.68937   0.46642   0.62809   0.75920
CL1   2    0.129074    1.143378    0.144963    11.00000    0.04844    0.02162 =
         0.05944    0.02078   -0.00499    0.00913
CL2   2    0.306426    1.130494    0.467273    11.00000    0.05297    0.01925 =
         0.04246    0.00151   -0.00086    0.01376
CL3   2    0.140508    0.963334    0.521617    11.00000    0.05072    0.02905 =
         0.03572    0.00454    0.00520    0.01674
CL4   2    0.046405    0.729766    0.542713    11.00000    0.04494    0.03178 =
         0.03519    0.01038    0.00852    0.01170
CL5   2   -0.082087    0.294549    0.282753    11.00000    0.04036    0.01528 =
         0.04343    0.01274   -0.00272   -0.00802
CL6   2   -0.053289    0.324880    0.137319    11.00000    0.03874    0.01576 =
         0.04322    0.00758   -0.00636   -0.00696
CL7   2    0.078687    0.415618    0.034092    11.00000    0.06145    0.03500 =
         0.03264   -0.00014   -0.00175   -0.01645
CL8   2    0.065016    0.915715    0.013690    11.00000    0.03733    0.03395 =
         0.04266    0.02246   -0.00614    0.00398
CL9   2    0.482326    1.245072    0.211824    11.00000    0.04980    0.01587 =
         0.05370    0.01633   -0.01113    0.00067
CL10  2    0.567801    1.220560    0.379634    11.00000    0.04924    0.01075 =
         0.04784    0.00446   -0.01001    0.00295
CL11  2    0.314232    0.562603    0.525794    11.00000    0.04638    0.02099 =
         0.02860    0.01151   -0.00043    0.00888
CL12  2    0.252054    0.335676    0.391220    11.00000    0.03726    0.01358 =
         0.03647    0.01326    0.00102    0.00409
CL13  2    0.305023    0.355157    0.078537    31.00000    0.03665    0.01548 =
         0.03138    0.00685   -0.00181    0.00482
CL14  2    0.367997    0.562261   -0.020622    11.00000    0.04346    0.03042 =
         0.02996    0.00390   -0.00130    0.00450
CL15  2    0.356846    0.825578   -0.039602    11.00000    0.04559    0.03543 =
         0.03368    0.01831   -0.00176    0.00296
CL16  2    0.771915    1.107782    0.165468    11.00000    0.03743    0.02071 =
         0.04132    0.01593   -0.00289   -0.00668
CL17  2    0.836874    1.058432    0.326218    11.00000    0.03275    0.01960 =
         0.04275    0.01153   -0.00349   -0.00035
CL18  2    0.660848    0.667840    0.455940    11.00000    0.03528    0.01681 =
         0.03106    0.00573   -0.00536    0.00751
CL19  2    0.596620    0.449743    0.330152    11.00000    0.03385    0.01423 =
         0.03429    0.00702   -0.00031    0.00710
CL20  2    0.636265    0.474868    0.179896    31.00000    0.03620    0.01612 =
         0.03077    0.00708    0.00060    0.00481
CL21  2    0.719058    0.656792    0.080885    11.00000    0.03535    0.03044 =
         0.03820    0.00533    0.00032    0.00584
CL22  2    0.710268    0.916390    0.045642    11.00000    0.03779    0.03674 =
         0.03475    0.01279    0.00394   -0.00588
C1    1   -0.024880    0.824398    0.310909    11.00000    0.02303    0.02273 =
         0.04735    0.01407    0.00258    0.00942
C2    1   -0.071981    0.725909    0.324218    11.00000    0.01580    0.02885 =
         0.03962    0.01251    0.00073    0.00653
C3    1   -0.093919    0.646135    0.275931    11.00000    0.01958    0.02457 =
         0.03419    0.01100    0.00334    0.00578
C4    1   -0.070706    0.664165    0.215594    11.00000    0.02795    0.02050 =
         0.03790    0.01150   -0.00711    0.00475
C5    1   -0.055734    0.764238    0.202754    11.00000    0.02080    0.02538 =
         0.03245    0.01042   -0.00557    0.00717
C6    1   -0.034421    0.841897    0.249332    11.00000    0.02626    0.02683 =
         0.03755    0.01196    0.00133    0.01436
C7    1    0.021506    0.935635    0.233860    11.00000    0.03908    0.02199 =
         0.03590    0.00756   -0.00383    0.01554
C8    1    0.107800    1.003990    0.275570    11.00000    0.04556    0.02001 =
         0.04570    0.01431    0.00483    0.01211
C9    1    0.130874    0.984795    0.333504    11.00000    0.04244    0.01922 =
         0.02661    0.00615   -0.00238    0.00837
C10   1    0.051175    0.895864    0.354567    11.00000    0.03113    0.02140 =
         0.04221    0.00946    0.00333    0.00967
C11   1    0.084285    0.869993    0.410756    11.00000    0.03698    0.02548 =
         0.03232    0.00901    0.00488    0.01862
C12   1    0.034199    0.775667    0.423708    11.00000    0.02332    0.02913 =
         0.03975    0.01874    0.01424    0.01418
C13   1   -0.046887    0.705780    0.381688    11.00000    0.02419    0.02343 =
         0.04019    0.01131    0.00505    0.00397
C14   1   -0.040216    0.610435    0.395417    11.00000    0.02607    0.02520 =
         0.03082    0.01500    0.00742    0.00299
C15   1   -0.061682    0.536539    0.350213    11.00000    0.01995    0.02420 =
         0.03164    0.01440    0.00535   -0.01026
C16   1   -0.090246    0.552710    0.290495    11.00000    0.02064    0.02171 =
         0.03499    0.01256    0.00153    0.00006
C17   1   -0.050581    0.486065    0.249467    11.00000    0.02188    0.01505 =
         0.03871    0.00845    0.00173   -0.00662
C18   1   -0.017579    0.505053    0.192646    11.00000    0.01792    0.01764 =
         0.03379    0.01206   -0.00444   -0.00356
C19   1   -0.031640    0.594849    0.174207    11.00000    0.02510    0.01895 =
         0.03300    0.00898    0.00122   -0.00039
C20   1    0.036638    0.627229    0.121686    11.00000    0.04166    0.01972 =
         0.03293    0.00890   -0.00539    0.00628
C21   1    0.033364    0.720221    0.106721    11.00000    0.04601    0.01623 =
         0.03007    0.01195   -0.00097   -0.00089
C22   1   -0.018636    0.785335    0.145505    11.00000    0.02037    0.02195 =
         0.03321    0.00646   -0.00547   -0.00138
C23   1    0.037428    0.881517    0.131988    11.00000    0.03856    0.02527 =
         0.03512    0.01492   -0.01469    0.00761
C24   1    0.056856    0.955332    0.175709    11.00000    0.04196    0.02229 =
         0.03635    0.01252   -0.00662    0.01248
C25   1    0.172164    1.042592    0.176528    11.00000    0.04348    0.02278 =
         0.04437    0.01598   -0.00278    0.01232
C26   1    0.200021    1.064535    0.243462    11.00000    0.05720    0.01841 =
         0.04352    0.00864    0.00471    0.00638
C27   1    0.321729    1.100966    0.267622    11.00000    0.05124    0.02157 =
         0.05802    0.01278   -0.01070   -0.01484
C28   1    0.349524    1.085992    0.326903    11.00000    0.06794    0.01560 =
         0.04399    0.00745   -0.00857   -0.01034
C29   1    0.250198    1.033863    0.360775    11.00000    0.06264    0.02084 =
         0.02887   -0.00067   -0.00289    0.00599
C30   1    0.291203    1.016073    0.422273    11.00000    0.04143    0.02284 =
         0.03827    0.01126    0.00413    0.00736
C31   1    0.199367    0.928511    0.450502    11.00000    0.03741    0.02247 =
         0.03131    0.00650    0.00005    0.00649
C32   1    0.285540    0.859595    0.457753    11.00000    0.02275    0.02192 =
         0.03346    0.00323   -0.00757    0.00750
C33   1    0.245525    0.762638    0.463902    11.00000    0.02523    0.02277 =
         0.02627    0.00866   -0.00165    0.00673
C34   1    0.098844    0.723001    0.466503    11.00000    0.03667    0.01711 =
         0.03711    0.00978    0.00341    0.00832
C35   1    0.057259    0.619917    0.438925    11.00000    0.02988    0.02203 =
         0.03230    0.01435    0.00793    0.00376
C36   1    0.140729    0.558260    0.433524    11.00000    0.02581    0.02291 =
         0.03086    0.01539    0.01003    0.00589
C37   1    0.117259    0.480181    0.387670    11.00000    0.02314    0.01443 =
         0.03405    0.01402    0.00168    0.00466
C38   1    0.013590    0.466473    0.348385    11.00000    0.02467    0.01474 =
         0.03751    0.01470    0.00554   -0.00188
C39   1    0.011662    0.418613    0.285298    11.00000    0.01768    0.01639 =
         0.04074    0.01152   -0.00718   -0.00271
C40   1    0.146675    0.427403    0.263187    11.00000    0.02292    0.00982 =
         0.03165    0.00883    0.00050   -0.00180
C41   1    0.162598    0.432926    0.203978    11.00000    0.03870    0.00877 =
         0.03520    0.00895   -0.00216    0.00537
C42   1    0.058784    0.440590    0.158540    11.00000    0.02743    0.00960 =
         0.03792    0.00747   -0.00335   -0.00155
C43   1    0.137297    0.482666    0.103981    11.00000    0.02500    0.01187 =
         0.03637    0.01006   -0.00224   -0.00393
C44   1    0.132257    0.584842    0.095102    11.00000    0.05868    0.01563 =
         0.02873    0.00724   -0.00023    0.00028
C45   1    0.232202    0.642379    0.064353    11.00000    0.05877    0.02947 =
         0.03998    0.01257    0.00697    0.00693
C46   1    0.228610    0.737675    0.053241    11.00000    0.06633    0.01694 =
         0.03503    0.01489    0.01474    0.00568
C47   1    0.127320    0.772367    0.071299    11.00000    0.04964    0.02343 =
         0.02727    0.00994   -0.00039    0.00700
C48   1    0.126019    0.879048    0.080451    11.00000    0.04379    0.02099 =
         0.03230    0.01400   -0.00525    0.00370
C49   1    0.262209    0.940068    0.098568    11.00000    0.04090    0.02945 =
         0.03801    0.02042   -0.00593    0.00043
C50   1    0.283306    1.015144    0.145007    11.00000    0.02368    0.02650 =
         0.04746    0.01822   -0.00888    0.00475
C51   1    0.409515    1.052986    0.170474    11.00000    0.03912    0.02193 =
         0.06755    0.02378    0.00529    0.00584
C52   1    0.437691    1.119741    0.228476    11.00000    0.05516    0.01194 =
         0.06319    0.01335   -0.02419   -0.00631
C53   1    0.571306    1.080779    0.241748    21.00000    0.03454
C53A  1    0.526740    1.100454    0.276502   -21.00000    0.01783
C54   1    0.591284    1.070487    0.294588    21.00000    0.02371
C54A  1    0.615766    1.053298    0.258247   -21.00000    0.01456
C55   1    0.491174    1.101589    0.341798    11.00000    0.06201    0.01454 =
         0.04569   -0.00003    0.00797   -0.01276
C56   1    0.510470    1.022473    0.378483    11.00000    0.03391    0.01539 =
         0.07377    0.00659    0.00759    0.00203
C57   1    0.418520    0.988019    0.416705    11.00000    0.03362    0.01699 =
         0.04816    0.00354    0.00432    0.00456
C58   1    0.410688    0.897481    0.436965    11.00000    0.02305    0.01521 =
         0.04551    0.00270    0.00039    0.00354
C59   1    0.491418    0.837519    0.416795    11.00000    0.04090    0.01561 =
         0.02743    0.00177   -0.00230    0.00457
C60   1    0.450835    0.737734    0.427114    11.00000    0.03014    0.01071 =
         0.03556    0.00497    0.00119    0.00794
C61   1    0.332116    0.700976    0.449964    11.00000    0.03329    0.01368 =
         0.02611    0.00078    0.00584    0.00112
C62   1    0.280377    0.591225    0.451124    11.00000    0.03457    0.01409 =
         0.02802    0.00831    0.00152    0.00241
C63   1    0.340210    0.534669    0.403943    11.00000    0.03511    0.01157 =
         0.02393    0.00939    0.00202    0.00907
C64   1    0.239080    0.452687    0.369223    11.00000    0.03704    0.01252 =
         0.02207    0.00914   -0.00659    0.00515
C65   1    0.258309    0.451154    0.302883    11.00000    0.01645    0.01005 =
         0.03767    0.00988   -0.00371   -0.00043
C66   1    0.380505    0.487425    0.279331    11.00000    0.03589    0.01204 =
         0.02160    0.00266    0.00082   -0.00115
C67   1    0.396221    0.496803    0.218711    11.00000    0.02977    0.02198 =
         0.02147    0.00072   -0.00797    0.00051
C68   1    0.285019    0.462878    0.181224    11.00000    0.03952    0.01938 =
         0.02763    0.00489    0.00307    0.00393
C69   1    0.277812    0.475581    0.118355    11.00000    0.04627    0.05658 =
         0.03327    0.02803    0.00073   -0.01187
C70   1    0.382773    0.553734    0.101188    11.00000    0.04476    0.03382 =
         0.02065    0.00439    0.00313    0.00072
C71   1    0.359763    0.615328    0.054651    11.00000    0.05771    0.02635 =
         0.02462    0.00778    0.00397   -0.00752
C72   1    0.480018    0.697949    0.070043    41.00000    0.05521    0.01045 =
         0.01689    0.00457    0.00149    0.00606
C72A  1    0.424164    0.726471    0.057204   -41.00000    0.01027
C73   1    0.478407    0.787731    0.060465    41.00000    0.03725    0.01729 =
         0.02460    0.01139    0.01047   -0.00398
C73A  1    0.522150    0.754672    0.081744   -41.00000    0.01395
C74   1    0.353149    0.809325    0.039476    11.00000    0.03146    0.04155 =
         0.04030    0.01485    0.00244    0.01554
C75   1    0.366562    0.904240    0.077196    11.00000    0.02795    0.03478 =
         0.04146    0.02155    0.00055    0.00152
C76   1    0.489131    0.940145    0.104438    11.00000    0.04159    0.03105 =
         0.04087    0.01880    0.00785    0.00860
C77   1    0.511057    1.012819    0.150840    11.00000    0.04010    0.01560 =
         0.05243    0.01006   -0.00360   -0.00280
C78   1    0.627911    1.027335    0.191853    11.00000    0.03095    0.01674 =
         0.04650    0.00979    0.00514   -0.01290
C79   1    0.654227    0.929697    0.199570    11.00000    0.02567    0.02197 =
         0.04809    0.01379   -0.00348   -0.00461
C80   1    0.667459    0.912898    0.257663    11.00000    0.03101    0.01988 =
         0.04630    0.01657   -0.00202   -0.00278
C81   1    0.668840    0.995441    0.303181    11.00000    0.02533    0.02121 =
         0.05743    0.01416   -0.00726    0.00159
C82   1    0.594904    0.964691    0.356175    11.00000    0.04127    0.01178 =
         0.06024    0.01396    0.00160    0.00247
C83   1    0.585533    0.871765    0.373645    11.00000    0.03590    0.01298 =
         0.05253    0.00774    0.00193    0.00517
C84   1    0.624395    0.799057    0.332900    11.00000    0.03197    0.01726 =
         0.03520    0.01180   -0.00096    0.00548
C85   1    0.592576    0.703254    0.344736    11.00000    0.01751    0.01741 =
         0.03126    0.01011    0.00077    0.00659
C86   1    0.534790    0.671833    0.401319    11.00000    0.02241    0.01642 =
         0.02828    0.01013   -0.00341    0.00394
C87   1    0.453377    0.570477    0.380735    11.00000    0.03126    0.01185 =
         0.02892    0.01011   -0.00497    0.00210
C88   1    0.494220    0.534731    0.321523    11.00000    0.03730    0.01313 =
         0.02725    0.00997   -0.00477    0.00717
C89   1    0.573099    0.626106    0.299018    11.00000    0.01565    0.01859 =
         0.03178    0.01138   -0.00547    0.00282
C90   1    0.581197    0.640205    0.240201    11.00000    0.02817    0.01626 =
         0.02761    0.00710   -0.00036    0.00338
C91   1    0.512942    0.558500    0.194565    11.00000    0.05411    0.04539 =
         0.02616    0.01485   -0.00598   -0.01100
C92   1    0.490409    0.589540    0.136913    11.00000    0.03572    0.03722 =
         0.02846    0.01059    0.00115    0.00459
C93   1    0.576610    0.681692    0.116841    11.00000    0.03337    0.03261 =
         0.02987    0.01293    0.00488    0.00682
C94   1    0.618046    0.760406    0.166043    11.00000    0.03192    0.02132 =
         0.03791    0.00920    0.01092    0.00972
C95   1    0.629645    0.854224    0.153025    11.00000    0.04244    0.02244 =
         0.04368    0.01817    0.00855   -0.00021
C96   1    0.576738    0.871421    0.093445    11.00000    0.04274    0.03226 =
         0.03018    0.00735    0.01032   -0.00691
C97   1    0.626244    0.738912    0.225813    11.00000    0.02454    0.02405 =
         0.04209    0.01986    0.00719    0.00285
C98   1    0.651669    0.816010    0.272542    11.00000    0.03151    0.02251 =
         0.03550    0.01422   -0.00551   -0.00152
HKLF 4

REM  fr1333 in P-1
REM R1 =  0.0722 for    6872 Fo > 4sig(Fo)  and  0.1495 for all   12323 data
REM   1090 parameters refined using      0 restraints

END

WGHT      0.0942      0.0000

REM Highest difference peak  0.639,  deepest hole -0.682,  1-sigma level  0.121
Q1    1   0.7904  1.0812  0.1211  11.00000  0.05    0.64
Q2    1   0.4970  1.2248  0.1692  11.00000  0.05    0.62
Q3    1   0.1229  0.3787  0.0460  11.00000  0.05    0.62
Q4    1   0.4401  1.1269  0.4410  11.00000  0.05    0.60
Q5    1   0.6597  0.6829  0.5022  11.00000  0.05    0.59
Q6    1   0.2579  0.3156  0.3433  11.00000  0.05    0.59
Q7    1   0.6973  0.8597  0.0131  11.00000  0.05    0.59
Q8    1   0.6746  0.6642  0.4121  11.00000  0.05    0.58
Q9    1   0.1100  0.5267 -0.0272  11.00000  0.05    0.57
Q10   1   0.4049  0.7751 -0.0426  11.00000  0.05    0.57
Q11   1  -0.0382  0.3024  0.0933  11.00000  0.05    0.57
Q12   1   0.2498  0.3491  0.4341  11.00000  0.05    0.55
Q13   1   0.7708  1.1256  0.2167  11.00000  0.05    0.54
Q14   1   0.0678  0.8975 -0.0313  11.00000  0.05    0.54
Q15   1   0.7221  0.6537  0.0313  11.00000  0.05    0.54
Q16   1   0.3368  0.7569 -0.0574  11.00000  0.05    0.54
Q17   1  -0.0784  0.2874  0.2391  11.00000  0.05    0.53
Q18   1   0.8343  1.0733  0.3785  11.00000  0.05    0.53
Q19   1   0.1269  1.1557  0.1984  11.00000  0.05    0.52
Q20   1   0.5575  1.2360  0.4314  11.00000  0.05    0.51
;
_shelx_res_checksum   45432

_shelx_hkl_file
;
   0   0  -2  141.86 753.653   1
   0   0  -2 -2112.7 742.518   1
   0   0   2   23.63 680.932   1
   0   0   2 -337.20 885.177   1
   0   0  -3 6409.18 1170.15   1
   0   0  -3 6346.55 1289.84   1
   0   0   3 6965.89 1150.66   1
   0   0   3 5915.10 1215.38   1
   0   0  -4  49443. 2426.58   1
   0   0  -4  56507. 2733.82   1
   0   0   4  49234. 2343.77   1
   0   0   4  47460. 2403.96   1
   0   0  -5 2779.05 2097.77   1
   0   0  -5 4189.28 2167.01   1
   0   0   5 2732.08 1619.69   1
   0   0   5 6576.19 1934.58   1
   0   0  -6 6102.99 1911.97   1
   0   0  -6 2810.37 2407.10   1
   0   0   6 4255.39 1740.78   1
   0   0   6 7313.84 2216.42   1
   0   0  -7 -357.69 1945.02   1
   0   0  -7 3952.68 2461.03   1
   0   0   7 2654.49 1745.30   1
   0   0   7  986.78 2211.55   1
   0   0  -8  64892. 3535.14   1
   0   0  -8  61273. 3201.81   1
   0   0   8  56785. 3147.87   1
   0   0   8  59534. 3233.47   1
   0   0  -9 5010.43 2314.54   1
   0   0  -9 5560.19 2426.58   1
   0   0   9 2711.55 2086.98   1
   0   0   9 2157.97 2101.95   1
   0   0 -10  67745. 3636.04   1
   0   0 -10  73869. 3733.47   1
   0   0  10  65414. 3358.38   1
   0   0  10  71886. 3545.58   1
   0   0 -11  12189. 2534.44   1
   0   0 -11  19210. 2490.60   1
   0   0  11  17843. 2349.68   1
   0   0  11  16837. 2268.96   1
   0   0 -12  33594. 2858.38   1
   0   0 -12  30470. 2656.57   1
   0   0  12  38587. 2804.10   1
   0   0  12  34304. 2559.84   1
   0   0 -13  25529. 2613.43   1
   0   0 -13  27599. 2742.52   1
   0   0  13  24224. 2591.51   1
   0   0  13  27905. 2438.76   1
   0   0 -14  45094. 3028.88   1
   0   0 -14  51357. 3222.68   1
   0   0  14  44955. 2977.03   1
   0   0  14  54593. 3033.40   1
   0   0 -15  22314. 2589.42   1
   0   0 -15  24621. 2498.95   1
   0   0  15  25713. 2569.24   1
   0   0  15  22220. 2233.12   1
   0   0 -16  38309. 2836.11   1
   0   0 -16  44711. 3074.46   1
   0   0  16  37891. 2789.14   1
   0   0  16  44224. 2766.87   1
   0   0 -17 8061.93 2415.45   1
   0   0 -17 5156.57 2438.41   1
   0   0  17 9464.15 2365.69   1
   0   0  17 5591.50 2123.17   1
   0   0 -18 1507.65 2460.68   1
   0   0 -18  267.01 2727.21   1
   0   0  18 3698.67 2416.14   1
   0   0  18 1013.22 2554.28   1
   0   0 -19 -2235.2 2573.41   1
   0   0 -19 1399.44 2728.95   1
   0   0  19 -898.05 2606.82   1
   0   0  19 1782.88 2533.40   1
   0   0 -20  11587. 2667.36   1
   0   0 -20  10285. 3152.40   1
   0   0  20  12985. 2676.41   1
   0   0  20  13274. 2827.42   1
   0   0 -21 9714.67 2985.04   1
   0   0 -21 7933.19 2674.32   1
   0   0  21  10536. 2752.96   1
   0   0  21 8917.88 2863.25   1
   0   0 -22 -689.63 2062.98   1
   0   0 -22 3702.15 2869.52   1
   0   0  22 2039.66 2148.92   1
   0   0  22 1810.37 2844.81   1
   0   0 -23  517.74 2049.75   1
   0   0 -23 -2368.5 2841.68   1
   0   0  23 -1624.2 1989.56   1
   0   0  23 2259.22 2556.02   1
   0   0 -24 5730.68 2784.27   1
   0   0 -24 3482.95 2716.77   1
   0   0  24 6917.18 2279.40   1
   0   0  24 1396.66 2636.04   1
   0   0 -25 -270.46 2612.38   1
   0   0 -25 -3681.3 2927.97   1
   0   0  25 4387.61 2525.05   1
   0   0  25   88.41 2182.32   1
   0   0 -26 -1197.6 3068.89   1
   0   0 -26  144.43 2611.69   1
   0   0  26 -1302.0 2284.62   1
   0   0  26 -1805.8 2651.01   1
   0   0 -27 -4860.8 3222.34   1
   0   0 -27  554.28 2385.18   1
   0   0  27  755.04 3104.38   1
   0   0  27 -1741.8 2698.68   1
   0  -1  27 4780.79 2563.32   1
   0  -1  27 4860.82 3048.36   1
   0   1 -27 3876.13 2377.87   1
   0   1 -27 6127.34 3235.91   1
   0  -1  26 -264.89 2390.05   1
   0  -1  26 2423.10 2359.43   1
   0   1 -26 2983.99 2531.66   1
   0   1 -26 2634.65 2800.62   1
   0  -1  25 1432.50 2387.61   1
   0  -1  25 -484.69 2310.71   1
   0   1 -25 -3383.1 2387.26   1
   0   1 -25 -2957.5 2188.59   1
   0  -1  24 3914.40 2398.05   1
   0  -1  24 2982.95 3232.43   1
   0   1 -24  219.24 2288.10   1
   0   1 -24 3622.13 2815.24   1
   0  -1  23  643.35 3075.85   1
   0  -1  23 6068.19 1970.77   1
   0   1 -23 -1584.5 2346.21   1
   0   1 -23 2842.38 2933.19   1
   0  -1  22  252.82 2574.46   1
   0  -1  22 1206.33 2369.52   1
   0   1 -22 4968.68 2295.06   1
   0   1 -22 2102.64 2903.96   1
   0  -1  21  496.87 2493.39   1
   0  -1  21 2910.23 2198.68   1
   0   1 -21 -631.18 2102.99   1
   0   1 -21 -1047.0 1930.06   1
   0  -1  20 3500.34 2760.61   1
   0  -1  20 4787.75 2615.17   1
   0   1 -20 7717.46 2582.81   1
   0   1 -20 2138.83 2649.96   1
   0  -1  19  46173. 3357.69   1
   0  -1  19  46451. 3723.03   1
   0   1 -19  40118. 3331.59   1
   0   1 -19  38553. 3643.00   1
   0  -1  18  13754. 2781.14   1
   0  -1  18  10891. 2555.67   1
   0   1 -18 9864.29 2792.62   1
   0   1 -18 9304.10 2675.36   1
   0  -1  17   83.92 1522.96   1
   0  -1  17 3271.74 1719.90   1
   0   1 -17 3387.26 2022.61   1
   0   1 -17 -808.63 1844.47   1
   0  -1  16 2474.95 1953.72   1
   0  -1  16 1215.38 1943.63   1
   0   1 -16  351.43 1551.84   1
   0   1 -16 7620.03 2339.25   1
   0  -1  15 1435.98 2150.31   1
   0  -1  15 -679.54 1984.34   1
   0   1 -15 -4025.7 2370.91   1
   0   1 -15   72.69 2443.28   1
   0  -1  14 4050.10 1556.02   1
   0  -1  14 2200.07 1442.59   1
   0   1 -14 -192.00 1870.21   1
   0   1 -14  816.98 1739.04   1
   0  -1  13 -3869.2 1989.56   1
   0  -1  13  146.59 2165.97   1
   0   1 -13  168.13 2369.17   1
   0   1 -13 2512.87 2144.40   1
   0  -1  12 7432.14 1816.28   1
   0  -1  12 4505.91 1963.46   1
   0   1 -12 7247.73 2063.67   1
   0   1 -12 7630.47 2313.15   1
   0  -1  11  17401. 2184.41   1
   0  -1  11  18358. 2329.50   1
   0   1 -11  20341. 2513.57   1
   0   1 -11  22220. 2733.12   1
   0  -1  10  97425. 4064.02   1
   0  -1  10  95616. 4022.26   1
   0   1 -10 100696. 4366.73   1
   0   1 -10  96346. 4109.25   1
   0  -1   9  60125. 2975.64   1
   0  -1   9  61447. 3176.06   1
   0   1  -9  62387. 3059.15   1
   0   1  -9  62491. 3218.51   1
   0  -1   8  61308. 3042.10   1
   0  -1   8  57272. 3165.62   1
   0   1  -8  63605. 3270.70   1
   0   1  -8  62944. 3219.20   1
   0  -1   7  26493. 2500.69   1
   0  -1   7  28396. 2395.27   1
   0   1  -7  28173. 2676.41   1
   0   1  -7  22832. 2346.21   1
   0  -1   6  52436. 2788.79   1
   0  -1   6  52366. 2922.75   1
   0   1  -6  57481. 3251.91   1
   0   1  -6  49756. 2572.02   1
   0  -1   5  77314. 3327.07   1
   0  -1   5  81037. 3830.89   1
   0   1  -5  86221. 3869.17   1
   0   1  -5  73626. 3168.75   1
   0  -1   4 3145.44 1418.58   1
   0  -1   4  611.34 1689.28   1
   0   1  -4 2675.71 1574.46   1
   0   1  -4 4199.72 1237.65   1
   0  -1   3 254488. 8938.75   1
   0  -1   3 246277. 8754.34   1
   0   1  -3 247842. 8723.03   1
   0   1  -3 266736. 9411.96   1
   0  -1   2  12230. 1036.19   1
   0  -1   2  12296. 963.117   1
   0   1  -2  11823. 996.520   1
   0   1  -2  10104. 958.245   1
   0  -1   1 -121.43 395.615   1
   0   1  -1 -306.61 441.544   1
   0  -1   0  787.40 718.858   1
   0  -1   0  -42.48 287.265   1
   0   1   0  667.36 605.427   1
   0   1   0  100.73 351.078   1
   0  -1  -1 -310.40 532.011   1
   0   1   1  689.63 661.447   1
   0  -1  -2 4321.50 952.678   1
   0  -1  -2 4832.98 1300.97   1
   0   1   2 3377.17 1107.86   1
   0   1   2 4039.66 1112.39   1
   0  -1  -3 126131. 4780.79   1
   0  -1  -3 114788. 4363.25   1
   0   1   3 128671. 4826.02   1
   0   1   3 125644. 4648.57   1
   0  -1  -4  23612. 2079.68   1
   0  -1  -4  26124. 2321.50   1
   0   1   4  23351. 1828.11   1
   0   1   4  18775. 2217.46   1
   0  -1  -5 103271. 4352.81   1
   0  -1  -5 104419. 4495.47   1
   0   1   5  99791. 4311.06   1
   0   1   5 101635. 4516.35   1
   0  -1  -6 7453.02 2101.95   1
   0  -1  -6  14795. 2601.25   1
   0   1   6 6266.52 2542.80   1
   0   1   6  14704. 2556.71   1
   0  -1  -7 7623.51 2235.21   1
   0  -1  -7 4592.90 2282.18   1
   0   1   7 2480.51 2266.53   1
   0   1   7 3890.05 2497.56   1
   0  -1  -8  21917. 2688.93   1
   0  -1  -8  25748. 2654.83   1
   0   1   8  23330. 2718.86   1
   0   1   8  25852. 2748.78   1
   0  -1  -9  86256. 4043.14   1
   0  -1  -9  76409. 3928.32   1
   0   1   9  76827. 3963.11   1
   0   1   9  76305. 3816.98   1
   0  -1 -10  24471. 2406.75   1
   0  -1 -10  23507. 2680.93   1
   0   1  10  14520. 2511.13   1
   0   1  10  22147. 2390.74   1
   0  -1 -11  96694. 4157.96   1
   0  -1 -11  89666. 3834.37   1
   0   1  11  80376. 3681.28   1
   0   1  11  84029. 3740.43   1
   0  -1 -12  59464. 3404.31   1
   0  -1 -12  64509. 3471.81   1
   0   1  12  58385. 3335.42   1
   0   1  12  61830. 3290.53   1
   0  -1 -13 -546.97 1934.24   1
   0  -1 -13 -1809.0 1620.04   1
   0   1  13 -2836.1 2048.71   1
   0   1  13 -756.78 1807.24   1
   0  -1 -14 5114.82 2007.65   1
   0  -1 -14  366.74 2224.42   1
   0   1  14 2806.89 2228.60   1
   0   1  14 5678.49 1975.99   1
   0  -1 -15 9537.22 1979.47   1
   0  -1 -15 6951.98 2175.02   1
   0   1  15 8799.57 1697.28   1
   0   1  15 9812.10 2083.16   1
   0  -1 -16 2651.01 2091.51   1
   0  -1 -16 4460.68 1652.05   1
   0   1  16 -676.41 2078.29   1
   0   1  16 3910.92 1516.35   1
   0  -1 -17  12495. 2245.30   1
   0  -1 -17 5247.04 2505.91   1
   0   1  17  13459. 2687.19   1
   0   1  17 9547.66 2157.62   1
   0  -1 -18 4714.68 2993.39   1
   0  -1 -18 2145.09 2743.91   1
   0   1  18 5483.64 2390.39   1
   0   1  18 -639.53 2454.07   1
   0  -1 -19  20591. 3026.79   1
   0  -1 -19  19130. 2812.11   1
   0   1  19  23424. 2432.84   1
   0   1  19  20031. 2202.85   1
   0  -1 -20  13713. 2727.90   1
   0  -1 -20  10981. 2133.26   1
   0   1  20  12349. 2378.56   1
   0   1  20  14168. 1997.56   1
   0  -1 -21  12321. 2927.62   1
   0  -1 -21 6308.28 2555.32   1
   0   1  21 8054.97 2746.69   1
   0   1  21  13191. 2582.81   1
   0  -1 -22 3952.68 2813.85   1
   0  -1 -22 1198.33 2872.65   1
   0   1  22 -1004.9 2692.06   1
   0   1  22 -329.61 2800.62   1
   0  -1 -23 8823.93 2968.33   1
   0  -1 -23 4843.42 3034.44   1
   0   1  23 3733.47 2897.70   1
   0   1  23 8716.07 2791.92   1
   0  -1 -24 2390.05 2997.21   1
   0  -1 -24  494.78 2550.10   1
   0   1  24 -1502.1 3093.25   1
   0   1  24 1229.99 2158.66   1
   0  -1 -25 2317.33 2232.08   1
   0  -1 -25 1463.46 3500.34   1
   0   1  25 -3365.3 3386.91   1
   0   1  25  755.04 2656.92   1
   0  -1 -26 1980.86 3075.85   1
   0  -1 -26 1958.59 3051.49   1
   0   1  26 2938.41 2842.38   1
   0   1  26 2351.08 3050.45   1
   0  -1 -27 2533.40 3114.47   1
   0  -1 -27 6590.11 2931.80   1
   0   1  27 6517.04 3307.23   1
   0   1  27 2100.55 3216.42   1
   0  -2  27 4418.92 2886.91   1
   0  -2  27 -717.47 3370.91   1
   0   2 -27   92.31 2774.53   1
   0   2 -27  11308. 3220.25   1
   0  -2  26  10619. 2416.49   1
   0  -2  26  11893. 2375.43   1
   0   2 -26  10992. 2896.31   1
   0   2 -26  10884. 2682.32   1
   0  -2  25 -382.05 2908.14   1
   0  -2  25 -2765.8 2425.54   1
   0   2 -25 2843.07 2340.99   1
   0   2 -25 -205.05 2819.06   1
   0  -2  24  13981. 2505.56   1
   0  -2  24  13065. 3500.34   1
   0   2 -24  18107. 2448.50   1
   0   2 -24  15230. 3161.79   1
   0  -2  23 -703.55 2666.66   1
   0  -2  23 2695.89 2278.70   1
   0   2 -23 -604.38 2501.74   1
   0   2 -23  458.94 2574.11   1
   0  -2  22 3990.95 2875.78   1
   0  -2  22 -1411.6 2734.86   1
   0   2 -22  314.65 2591.86   1
   0   2 -22  751.91 3061.24   1
   0  -2  21 5462.76 3049.41   1
   0  -2  21 4857.34 2228.25   1
   0   2 -21 3237.30 2258.52   1
   0   2 -21 5636.74 2927.28   1
   0  -2  20 -969.73 2422.06   1
   0  -2  20 2853.51 2162.84   1
   0   2 -20 -1738.0 2185.45   1
   0   2 -20  380.31 2285.31   1
   0  -2  19 6325.67 2427.97   1
   0  -2  19 3531.66 3022.27   1
   0   2 -19  266.46 2601.25   1
   0   2 -19 1170.49 4036.18   1
   0  -2  18 5859.42 1980.17   1
   0  -2  18 5542.79 1910.23   1
   0   2 -18 8910.92 1943.63   1
   0   2 -18 9432.84 2174.32   1
   0  -2  17 -319.73 2193.11   1
   0  -2  17  377.87 2075.15   1
   0   2 -17 1570.98 2127.00   1
   0   2 -17 4318.02 2667.36   1
   0  -2  16 -744.61 1713.99   1
   0  -2  16 -236.78 1432.50   1
   0   2 -16 -1327.4 1789.14   1
   0   2 -16 1351.77 1773.48   1
   0  -2  15  37230. 2543.14   1
   0  -2  15  34589. 2814.89   1
   0   2 -15  35804. 2612.38   1
   0   2 -15  35456. 2840.29   1
   0  -2  14  14363. 2173.97   1
   0  -2  14  16743. 2278.36   1
   0   2 -14  16148. 2256.43   1
   0   2 -14  17269. 2458.59   1
   0  -2  13  65658. 3245.65   1
   0  -2  13  72408. 3601.25   1
   0   2 -13  66284. 3393.18   1
   0   2 -13  65205. 3284.27   1
   0  -2  12  20818. 2362.21   1
   0  -2  12  18466. 1807.24   1
   0   2 -12  22728. 2246.00   1
   0   2 -12  20007. 2321.15   1
   0  -2  11 4547.66 2055.67   1
   0  -2  11 1476.69 1907.10   1
   0   2 -11 3342.72 2167.36   1
   0   2 -11 -963.12 1833.68   1
   0  -2  10    3.73 1726.51   1
   0  -2  10 -4850.4 2283.57   1
   0   2 -10 -2033.4 1535.14   1
   0   2 -10 -2273.1 2134.31   1
   0  -2   9 -2149.6 1588.03   1
   0  -2   9 2377.87 1884.48   1
   0   2  -9 1515.66 2028.18   1
   0   2  -9  727.56 1484.69   1
   0  -2   8  21239. 1922.41   1
   0  -2   8  21983. 2020.53   1
   0   2  -8  18177. 2128.74   1
   0   2  -8  21764. 1860.82   1
   0  -2   7 5208.76 1952.33   1
   0  -2   7  10150. 2271.05   1
   0   2  -7 8061.93 2037.58   1
   0   2  -7 4725.12 1962.07   1
   0  -2   6  62387. 3397.70   1
   0  -2   6  63222. 3059.84   1
   0   2  -6  70459. 3320.80   1
   0   2  -6  70772. 3448.85   1
   0  -2   5 8639.52 2000.00   1
   0  -2   5 9227.55 1607.51   1
   0   2  -5  10177. 1419.97   1
   0   2  -5 9102.29 2092.90   1
   0  -2   4  75470. 3147.18   1
   0  -2   4  76827. 3432.50   1
   0   2  -4  80028. 3500.34   1
   0   2  -4  75678. 3187.19   1
   0  -2   3 6099.51 1315.59   1
   0  -2   3 3827.41 1619.69   1
   0   2  -3 7411.27 1566.11   1
   0   2  -3 6642.30 1475.64   1
   0  -2   2 129889. 4867.78   1
   0  -2   2 136847. 5010.43   1
   0   2  -2 130689. 4839.94   1
   0   2  -2 119833. 4439.80   1
   0  -2   1  13333. 1162.14   1
   0  -2   1  14941. 1418.23   1
   0   2  -1  13278. 1293.67   1
   0   2  -1  13365. 1327.76   1
   0  -2   0 251670. 8879.60   1
   0  -2   0 265831. 9311.06   1
   0   2   0 275991. 9690.32   1
   0   2   0 250069. 8789.14   1
   0  -2  -1 9098.81 1433.89   1
   0  -2  -1 5421.01 1108.56   1
   0   2   1 9102.29 1148.57   1
   0   2   1 8054.97 1216.07   1
   0  -2  -2  92032. 3583.85   1
   0  -2  -2  94120. 3813.50   1
   0   2   2  87056. 3486.43   1
   0   2   2  88205. 3559.50   1
   0  -2  -3  34725. 2100.21   1
   0  -2  -3  37439. 2450.24   1
   0   2   3  32227. 2078.98   1
   0   2   3  37683. 2394.57   1
   0  -2  -4  63639. 3102.64   1
   0  -2  -4  73417. 3482.95   1
   0   2   4  62770. 3214.68   1
   0   2   4  61482. 2847.94   1
   0  -2  -5 9784.26 2345.16   1
   0  -2  -5  10414. 2187.54   1
   0   2   5  10846. 1798.88   1
   0   2   5 8983.99 2159.71   1
   0  -2  -6 350034.  12582.   1
   0  -2  -6 346172.  12456.   1
   0   2   6 375087.  13347.   1
   0   2   6 354558.  12773.   1
   0  -2  -7 1127.35 2215.73   1
   0  -2  -7 4624.21 2267.57   1
   0   2   7 2965.20 2185.80   1
   0   2   7 -3007.7 2238.34   1
   0  -2  -8  59986. 3405.01   1
   0  -2  -8  61065. 3251.21   1
   0   2   8  59360. 3307.23   1
   0   2   8  65101. 3615.17   1
   0  -2  -9 1265.13 2275.57   1
   0  -2  -9 2580.37 2279.05   1
   0   2   9 2341.33 2269.31   1
   0   2   9 3921.36 2609.95   1
   0  -2 -10  48295. 2603.34   1
   0  -2 -10  44885. 2854.21   1
   0   2  10  44850. 2501.39   1
   0   2  10  46555. 2988.17   1
   0  -2 -11  26162. 2006.26   1
   0  -2 -11  22853. 2342.38   1
   0   2  11  24088. 2363.95   1
   0   2  11  26900. 2109.60   1
   0  -2 -12 124669. 5236.60   1
   0  -2 -12 118511. 4742.51   1
   0   2  12 121677. 4874.73   1
   0   2  12 116632. 4930.41   1
   0  -2 -13  25598. 2368.13   1
   0  -2 -13  20672. 2182.32   1
   0   2  13  19652. 2277.66   1
   0   2  13  26169. 2274.88   1
   0  -2 -14  24273. 2372.30   1
   0  -2 -14  22390. 2422.41   1
   0   2  14  23514. 1929.71   1
   0   2  14  23142. 2411.27   1
   0  -2 -15  166.18 1927.97   1
   0  -2 -15 1083.85 2244.60   1
   0   2  15 -563.33 1988.52   1
   0   2  15  658.32 1916.49   1
   0  -2 -16 2397.01 2258.17   1
   0  -2 -16 1799.58 2075.50   1
   0   2  16 6457.89 2146.48   1
   0   2  16 3879.61 1933.19   1
   0  -2 -17  23326. 2819.06   1
   0  -2 -17  28542. 2891.79   1
   0   2  17  21858. 2374.04   1
   0   2  17  16670. 2598.47   1
   0  -2 -18 5883.78 2495.13   1
   0  -2 -18 2869.17 2792.27   1
   0   2  18 8569.93 2567.85   1
   0   2  18 2895.61 2314.89   1
   0  -2 -19 -1689.3 2448.85   1
   0  -2 -19 1157.27 2931.10   1
   0   2  19 -2048.4 2517.74   1
   0   2  19 -192.45 2477.73   1
   0  -2 -20 8771.74 2234.17   1
   0  -2 -20 7480.86 2838.55   1
   0   2  20 6537.92 2686.50   1
   0   2  20 7536.53 2079.33   1
   0  -2 -21 2384.48 3040.36   1
   0  -2 -21 6120.38 2060.54   1
   0   2  21 8281.13 3099.86   1
   0   2  21 8399.43 1962.77   1
   0  -2 -22 2823.59 2803.76   1
   0  -2 -22 1866.73 2833.68   1
   0   2  22 -150.94 2710.51   1
   0   2  22 -1059.5 2683.71   1
   0  -2 -23 -4739.0 2677.10   1
   0  -2 -23  491.30 2723.73   1
   0   2  23 2404.66 2450.59   1
   0   2  23 2301.67 2330.55   1
   0  -2 -24 7397.35 3014.26   1
   0  -2 -24 1453.03 2543.49   1
   0   2  24 4258.87 2584.55   1
   0   2  24 9558.10 2517.05   1
   0  -2 -25 1105.43 2611.34   1
   0  -2 -25 -4815.6 3461.72   1
   0   2  25 3841.33 2549.75   1
   0   2  25 3935.28 2983.30   1
   0  -2 -26 5751.56 2728.60   1
   0  -2 -26 8705.63 3094.29   1
   0   2  26 7870.56 2994.43   1
   0   2  26 7515.65 2731.38   1
   0  -3  27 8990.94 3432.50   1
   0  -3  27  14753. 3121.43   1
   0   3 -27  14335. 2889.00   1
   0   3 -27 8994.42 3297.49   1
   0  -3  26 -1137.8 2380.30   1
   0  -3  26 -5066.1 2711.20   1
   0   3 -26 -699.37 2725.47   1
   0   3 -26 -3036.9 2724.08   1
   0  -3  25 8653.44 2527.83   1
   0  -3  25 9519.82 2922.75   1
   0   3 -25 3353.86 2627.69   1
   0   3 -25 1272.09 3134.30   1
   0  -3  24 3353.16 2737.30   1
   0  -3  24   54.04 3264.44   1
   0   3 -24 -3980.5 2662.14   1
   0   3 -24  135.53 2791.23   1
   0  -3  23  12116. 2827.76   1
   0  -3  23  14582. 2525.40   1
   0   3 -23  14760. 2645.44   1
   0   3 -23  14005. 2940.50   1
   0  -3  22 -1763.7 2471.81   1
   0  -3  22 1260.61 2892.13   1
   0   3 -22 1257.83 2284.97   1
   0  -3  21  12345. 2659.36   1
   0  -3  21  12046. 2621.78   1
   0   3 -21  14923. 2812.45   1
   0   3 -21  13239. 3005.56   1
   0  -3  20 -4902.6 2518.44   1
   0  -3  20 3496.87 2381.00   1
   0   3 -20 1881.70 2306.19   1
   0   3 -20 2908.49 2700.76   1
   0  -3  19 1621.08 2610.30   1
   0  -3  19  739.04 2179.89   1
   0   3 -19  413.01 2313.50   1
   0   3 -19 2295.75 3002.08   1
   0  -3  18  347.46 2305.50   1
   0  -3  18 -2127.7 1812.80   1
   0   3 -18 -2470.4 1972.51   1
   0   3 -18 -1012.2 2399.44   1
   0  -3  17 -285.32 1936.67   1
   0  -3  17 3076.20 2252.26   1
   0   3 -17 2455.11 1773.48   1
   0   3 -17 6398.74 2514.96   1
   0  -3  16 -321.33 1634.31   1
   0  -3  16 4923.45 2025.75   1
   0   3 -16 -791.93 1621.08   1
   0   3 -16 -1945.4 2239.73   1
   0  -3  15  32244. 2501.39   1
   0  -3  15  28285. 2094.64   1
   0   3 -15  32046. 1997.56   1
   0   3 -15  31180. 2535.84   1
   0  -3  14 -177.17 1666.67   1
   0  -3  14 3879.61 2060.54   1
   0   3 -14  -40.50 1623.87   1
   0   3 -14  100.14 2113.08   1
   0  -3  13 193806. 7369.51   1
   0  -3  13 189179. 7244.25   1
   0   3 -13 184934. 7018.09   1
   0   3 -13 193319. 7338.20   1
   0  -3  12  27470. 2395.96   1
   0  -3  12  30226. 2133.96   1
   0   3 -12  30035. 2125.26   1
   0   3 -12  32053. 2303.41   1
   0  -3  11 -722.34 2108.56   1
   0  -3  11 3514.26 1886.22   1
   0   3 -11 3709.11 2162.14   1
   0   3 -11 3482.95 2057.41   1
   0  -3  10 6450.93 1878.91   1
   0  -3  10 1552.54 1580.37   1
   0   3 -10 2951.63 1782.88   1
   0   3 -10 1069.94 1954.42   1
   0  -3   9  34829. 2297.49   1
   0  -3   9  40014. 2609.60   1
   0   3  -9  37648. 2437.72   1
   0   3  -9  39631. 2395.96   1
   0  -3   8 -955.11 1750.17   1
   0  -3   8 -1160.4 2261.65   1
   0   3  -8 1154.14 1989.21   1
   0   3  -8 3212.24 1955.11   1
   0  -3   7 194815. 7473.90   1
   0  -3   7 178392. 6691.02   1
   0   3  -7 171120. 6377.86   1
   0   3  -7 199374. 7494.77   1
   0  -3   6 123347. 4940.84   1
   0  -3   6 119972. 4878.21   1
   0   3  -6 120877. 4798.19   1
   0   3  -6 125435. 5024.35   1
   0  -3   5 127662. 5041.75   1
   0  -3   5 140188. 5539.31   1
   0   3  -5 129645. 5139.17   1
   0   3  -5 136117. 5354.90   1
   0  -3   4 -201.77 1332.64   1
   0  -3   4 1692.07 1658.66   1
   0   3  -4 3243.91 1534.45   1
   0   3  -4 1930.06 1759.57   1
   0  -3   3  73486. 3127.00   1
   0  -3   3  81698. 3670.84   1
   0   3  -3  80341. 3503.82   1
   0  -3   2 5264.44 1747.04   1
   0  -3   2 8399.43 1466.94   1
   0   3  -2 3072.72 1511.13   1
   0   3  -2 6927.62 1793.32   1
   0  -3   1 3482.95 1726.16   1
   0  -3   1 2534.10 1454.07   1
   0   3  -1 5073.06 1623.17   1
   0   3  -1 3775.22 1569.24   1
   0  -3   0  613.43 1683.02   1
   0  -3   0  775.57 1400.49   1
   0   3   0 1147.88 1576.89   1
   0   3   0 -765.83 1608.21   1
   0  -3  -1 130202. 4947.80   1
   0  -3  -1 129297. 5034.79   1
   0   3   1 121921. 4686.84   1
   0   3   1 127731. 4899.09   1
   0  -3  -2  22161. 2213.64   1
   0  -3  -2  20658. 1840.29   1
   0   3   2  21750. 1960.33   1
   0   3   2  23629. 2114.82   1
   0  -3  -3  13970. 2140.57   1
   0  -3  -3 8942.23 1816.63   1
   0   3   3  10964. 1767.92   1
   0   3   3  15042. 2174.67   1
   0  -3  -4  22589. 2016.35   1
   0  -3  -4  20129. 2301.32   1
   0   3   4  17129. 1947.11   1
   0   3   4  21291. 2330.90   1
   0  -3  -5  997.91 2111.34   1
   0  -3  -5 2897.00 1966.94   1
   0   3   5 3549.06 1832.64   1
   0   3   5 3336.11 2289.14   1
   0  -3  -6  19530. 2441.19   1
   0  -3  -6  19262. 1905.01   1
   0   3   6  17777. 1931.80   1
   0   3   6  17801. 2077.24   1
   0  -3  -7 146138. 5880.30   1
   0  -3  -7 136534. 5403.61   1
   0   3   7 139805. 5473.20   1
   0   3   7 135490. 5361.86   1
   0  -3  -8 1443.98 2219.90   1
   0  -3  -8  490.95 2489.56   1
   0   3   8  155.57 1878.22   1
   0   3   8 -2419.3 2456.50   1
   0  -3  -9  24074. 2659.01   1
   0  -3  -9  25644. 2340.64   1
   0   3   9  23166. 1819.41   1
   0   3   9  24774. 2713.98   1
   0  -3 -10 2356.30 1972.51   1
   0  -3 -10 2752.96 2316.28   1
   0   3  10  947.46 1337.51   1
   0   3  10  290.99 2423.10   1
   0  -3 -11  27408. 2575.15   1
   0  -3 -11  19019. 1877.17   1
   0   3  11  21754. 2116.91   1
   0   3  11  20974. 2096.03   1
   0  -3 -12 7230.33 2013.57   1
   0  -3 -12 8862.20 1853.16   1
   0   3  12 9095.33 1916.14   1
   0   3  12 4283.22 2259.57   1
   0  -3 -13  22575. 2347.95   1
   0  -3 -13  18486. 2399.09   1
   0   3  13  21997. 2227.56   1
   0   3  13  21127. 2505.91   1
   0  -3 -14  40710. 2859.43   1
   0  -3 -14  39074. 2696.94   1
   0   3  14  40571. 2876.13   1
   0   3  14  37265. 2558.10   1
   0  -3 -15 -1756.4 2223.03   1
   0  -3 -15 1304.10 1997.91   1
   0   3  15 4057.06 1966.60   1
   0   3  15 -2350.7 2132.57   1
   0  -3 -16 6384.82 2481.21   1
   0  -3 -16 4439.80 1731.38   1
   0   3  16 5991.64 2298.88   1
   0   3  16 4836.46 2035.14   1
   0  -3 -17 -2689.6 2291.23   1
   0  -3 -17 3317.32 2239.73   1
   0   3  17  612.04 2160.75   1
   0   3  17 -1704.6 2207.37   1
   0  -3 -18  876.13 2814.54   1
   0  -3 -18 4175.36 2770.70   1
   0   3  18 2858.38 2185.45   1
   0   3  18 5699.37 2625.26   1
   0  -3 -19  41684. 3500.34   1
   0  -3 -19  32655. 2571.67   1
   0   3  19  41023. 3228.95   1
   0   3  19  34304. 2477.38   1
   0  -3 -20  470.77 2785.66   1
   0  -3 -20  545.23 2747.74   1
   0   3  20 -2374.4 1930.41   1
   0   3  20 1243.21 2592.90   1
   0  -3 -21 -1251.6 2178.49   1
   0  -3 -21 1603.34 2843.42   1
   0   3  21 1407.79 2816.28   1
   0   3  21 -243.15 2462.77   1
   0  -3 -22  949.89 2824.98   1
   0  -3 -22  517.74 2904.66   1
   0   3  22 6245.64 2804.45   1
   0   3  22 1472.16 2351.42   1
   0  -3 -23  10195. 2749.82   1
   0  -3 -23 6576.19 2514.26   1
   0   3  23  10536. 2864.99   1
   0   3  23  11089. 2501.04   1
   0  -3 -24  829.16 3126.30   1
   0  -3 -24 1600.90 2984.69   1
   0   3  24 -2566.1 2960.33   1
   0   3  24 -2935.6 2733.47   1
   0  -3 -25 9283.22 2388.65   1
   0  -3 -25  15699. 3035.84   1
   0   3  25 8260.26 2464.51   1
   0   3  25 9251.90 2429.36   1
   0  -3 -26 -2780.1 2582.46   1
   0  -3 -26 -2482.3 2822.89   1
   0   3  26 -2507.7 2248.08   1
   0   3  26 1604.73 3028.88   1
   0  -4  27   58.18 3331.24   1
   0  -4  27 1059.85 2545.93   1
   0   4 -27 5452.33 2781.83   1
   0   4 -27 3806.54 2450.94   1
   0  -4  26 -5793.3 3324.63   1
   0  -4  26 -2254.3 2559.50   1
   0   4 -26 6200.41 2396.66   1
   0   4 -26 -1590.5 3226.86   1
   0  -4  25 4491.99 2373.00   1
   0  -4  25 3622.13 3058.10   1
   0   4 -25 4025.74 2837.51   1
   0   4 -25 3879.61 2903.96   1
   0  -4  24 -1656.9 2363.95   1
   0  -4  24 -624.22 3262.35   1
   0   4 -24 6430.06 2938.41   1
   0   4 -24 1618.30 2564.72   1
   0  -4  23 -2307.6 2824.98   1
   0  -4  23 3119.34 2617.60   1
   0   4 -23 -936.32 2474.25   1
   0   4 -23  245.16 2998.61   1
   0  -4  22 -2989.6 2293.67   1
   0  -4  22  183.02 1999.30   1
   0   4 -22 -2656.2 2244.95   1
   0   4 -22  880.65 2313.50   1
   0  -4  21 3135.00 2782.53   1
   0  -4  21 5017.39 2637.44   1
   0   4 -21 7710.50 2624.91   1
   0   4 -21   95.41 3206.33   1
   0  -4  20  11771. 2526.79   1
   0  -4  20 9185.79 2539.66   1
   0   4 -20  12470. 2443.98   1
   0   4 -20 7943.62 2953.02   1
   0  -4  19  16729. 2292.62   1
   0  -4  19  16138. 2095.34   1
   0   4 -19  24725. 2362.91   1
   0   4 -19  16611. 2324.98   1
   0  -4  18 4109.25 2335.42   1
   0  -4  18 5128.74 2006.26   1
   0   4 -18 6913.70 2154.49   1
   0   4 -18 5828.11 2407.79   1
   0  -4  17 7971.46 2375.43   1
   0  -4  17 5424.49 1966.25   1
   0   4 -17 5006.95 2050.45   1
   0   4 -17 4871.25 2342.38   1
   0  -4  16 4178.84 1748.43   1
   0  -4  16 2037.23 2061.58   1
   0   4 -16 2077.24 2106.47   1
   0   4 -16 3663.88 1564.72   1
   0  -4  15 2012.52 1853.51   1
   0  -4  15 -2048.0 1824.63   1
   0   4 -15  531.31 1657.62   1
   0   4 -15 2099.86 1694.50   1
   0  -4  14 1282.18 1806.54   1
   0  -4  14 8016.69 1631.87   1
   0   4 -14 5657.61 1909.88   1
   0   4 -14 5855.94 1495.48   1
   0  -4  13  33928. 2606.47   1
   0  -4  13  32905. 2427.97   1
   0   4 -13  30842. 2212.59   1
   0   4 -13  31298. 2434.24   1
   0  -4  12  51253. 2729.29   1
   0  -4  12  54662. 2811.41   1
   0   4 -12  53827. 2649.27   1
   0   4 -12  51809. 2615.52   1
   0  -4  11  15003. 1938.76   1
   0  -4  11  13010. 2260.96   1
   0   4 -11  19544. 1866.39   1
   0   4 -11  17293. 1840.64   1
   0  -4  10 9422.40 2266.87   1
   0  -4  10 7713.98 1914.75   1
   0   4 -10 6604.03 1864.99   1
   0   4 -10 7453.02 1751.91   1
   0  -4   9  14276. 1743.91   1
   0  -4   9  11075. 1974.60   1
   0   4  -9  16273. 1981.56   1
   0   4  -9  13271. 1981.21   1
   0  -4   8 3646.48 1905.36   1
   0  -4   8 -794.01 1905.01   1
   0   4  -8 2516.00 1470.42   1
   0  -4   7 145894. 5699.37   1
   0  -4   7 132533. 5121.78   1
   0   4  -7 137335. 5462.76   1
   0   4  -7 136221. 5278.35   1
   0  -4   6  17192. 1947.11   1
   0  -4   6  17710. 2210.16   1
   0   4  -6  20150. 2250.87   1
   0   4  -6  21065. 2044.54   1
   0  -4   5  27791. 2120.74   1
   0  -4   5  31110. 1931.45   1
   0   4  -5  31764. 2281.83   1
   0   4  -5  36012. 2451.63   1
   0  -4   4  26440. 2183.71   1
   0  -4   4  27700. 2048.71   1
   0   4  -4  29165. 2236.95   1
   0   4  -4  27996. 2065.76   1
   0  -4   3  63083. 3016.35   1
   0  -4   3  65762. 3222.68   1
   0   4  -3  67119. 3187.19   1
   0   4  -3  63292. 3172.58   1
   0  -4   2 225017. 8284.61   1
   0  -4   2 220772. 8114.12   1
   0   4  -2 233472. 8510.78   1
   0   4  -2 225365. 8333.33   1
   0  -4   1  91754. 3897.00   1
   0  -4   1  78740. 3646.48   1
   0   4  -1  87787. 3768.26   1
   0   4  -1  87996. 3949.20   1
   0  -4   0 -2060.5 1716.07   1
   0  -4   0 1329.85 1844.47   1
   0   4   0  969.73 1767.57   1
   0   4   0 -1976.7 1726.86   1
   0  -4  -1 110682. 4617.25   1
   0  -4  -1 107864. 4342.38   1
   0   4   1 105532. 4384.13   1
   0   4   1 113918. 4582.46   1
   0  -4  -2  29697. 2327.07   1
   0  -4  -2  29565. 2148.92   1
   0   4   2  26082. 2173.28   1
   0   4   2  30769. 2360.82   1
   0  -4  -3  54523. 3057.76   1
   0  -4  -3  56054. 2929.36   1
   0   4   3  49513. 2866.39   1
   0   4   3  50835. 3019.48   1
   0  -4  -4  17404. 2002.43   1
   0  -4  -4  18862. 2140.57   1
   0   4   4  19196. 1937.02   1
   0   4   4  15720. 2199.02   1
   0  -4  -5 176235. 6784.96   1
   0  -4  -5 178253. 6774.52   1
   0   4   5 165553. 6311.75   1
   0   4   5 175470. 6823.24   1
   0  -4  -6 196207. 7414.75   1
   0  -4  -6 196868. 7362.55   1
   0   4   6 200139. 7470.42   1
   0   4   6 196555. 7397.35   1
   0  -4  -7 5212.24 1945.02   1
   0  -4  -7 2635.00 2109.25   1
   0   4   7 2339.59 1820.81   1
   0   4   7 2239.39 2006.96   1
   0  -4  -8  35177. 2844.12   1
   0  -4  -8  30431. 2586.29   1
   0   4   8  29635. 2227.56   1
   0   4   8  33365. 2709.81   1
   0  -4  -9  71851. 3691.72   1
   0  -4  -9  65344. 3211.90   1
   0   4   9  65136. 3361.17   1
   0   4   9  68580. 3321.85   1
   0  -4 -10  50731. 3162.84   1
   0  -4 -10  54488. 2907.79   1
   0   4  10  52436. 2827.42   1
   0   4  10  47599. 2703.89   1
   0  -4 -11  28319. 2584.55   1
   0  -4 -11  29447. 2646.83   1
   0   4  11  24308. 2145.44   1
   0   4  11  31061. 2776.62   1
   0  -4 -12 8643.00 2048.71   1
   0  -4 -12  12467. 2302.71   1
   0   4  12 7759.21 1906.05   1
   0   4  12 6614.47 1790.88   1
   0  -4 -13 2243.56 1828.11   1
   0  -4 -13 6395.26 2159.71   1
   0   4  13 4773.83 1614.13   1
   0   4  13 4018.79 2479.47   1
   0  -4 -14 5796.79 2184.41   1
   0  -4 -14 9025.74 2230.34   1
   0   4  14  10111. 1947.11   1
   0   4  14 5483.64 2418.23   1
   0  -4 -15 4363.25 2166.32   1
   0  -4 -15 -1566.8 2284.27   1
   0   4  15 1128.04 1910.92   1
   0   4  15  792.97 2236.60   1
   0  -4 -16 2909.53 2451.98   1
   0  -4 -16 1619.00 2533.75   1
   0   4  16 1774.53 2244.95   1
   0   4  16 1188.24 2387.26   1
   0  -4 -17 -2517.4 2838.90   1
   0  -4 -17 3161.44 2616.91   1
   0   4  17 -583.85 2610.30   1
   0   4  17 -2415.1 2360.47   1
   0  -4 -18 5835.07 2890.39   1
   0  -4 -18 6732.77 2885.17   1
   0   4  18 6697.98 2545.93   1
   0   4  18 3928.32 2686.15   1
   0  -4 -19 2388.65 2538.97   1
   0  -4 -19 3872.65 2512.52   1
   0   4  19 3862.21 2580.72   1
   0   4  19 -1859.1 2439.80   1
   0  -4 -20 1058.45 2028.18   1
   0  -4 -20 -1499.7 2422.75   1
   0   4  20 -1568.5 2099.86   1
   0   4  20 -1536.5 2380.65   1
   0  -4 -21 5594.98 3010.44   1
   0  -4 -21 3538.62 2859.08   1
   0   4  21 1974.95 2734.17   1
   0   4  21 8281.13 2821.50   1
   0  -4 -22 2154.14 2146.14   1
   0  -4 -22 1120.74 2203.89   1
   0   4  22  -28.45 2154.14   1
   0   4  22 1533.40 2572.37   1
   0  -4 -23 7950.58 2736.25   1
   0  -4 -23  11889. 3145.09   1
   0   4  23  10793. 2986.43   1
   0   4  23 7929.71 2673.97   1
   0  -4 -24 -3281.1 3218.86   1
   0  -4 -24 -866.74 2585.24   1
   0   4  24 -1997.6 2052.89   1
   0   4  24 5521.92 2829.85   1
   0  -4 -25 3562.98 3164.58   1
   0  -4 -25 -275.16 2511.83   1
   0   4  25 4700.76 2115.86   1
   0   4  25  842.73 2865.34   1
   0  -5  27 1620.04 3390.05   1
   0   5 -27 6116.90 2852.12   1
   0  -5  26 -3618.6 3022.61   1
   0  -5  26 1977.38 2390.74   1
   0   5 -26 -453.37 2923.10   1
   0   5 -26 -2649.3 2289.49   1
   0  -5  25 6739.73 3057.76   1
   0  -5  25 5483.64 2910.57   1
   0   5 -25 7713.98 2494.08   1
   0   5 -25 8872.64 2883.09   1
   0  -5  24 8931.79 3043.49   1
   0  -5  24 2009.04 3071.33   1
   0   5 -24 6381.34 2235.56   1
   0   5 -24 8267.22 3387.96   1
   0  -5  23 3181.97 2369.87   1
   0  -5  23  523.31 2099.51   1
   0   5 -23 -250.80 2253.30   1
   0   5 -23 5935.97 2414.05   1
   0  -5  22 7359.07 3057.76   1
   0  -5  22 2002.78 2007.65   1
   0   5 -22 7292.96 2464.16   1
   0   5 -22 4359.77 2735.56   1
   0  -5  21 2445.72 2596.03   1
   0  -5  21 4578.98 2890.74   1
   0   5 -21 -2540.0 2316.63   1
   0   5 -21 1133.61 2981.90   1
   0  -5  20 -589.07 2573.07   1
   0  -5  20 -3427.6 2643.00   1
   0   5 -20 1438.76 2056.37   1
   0   5 -20 -1822.2 2856.29   1
   0  -5  19  22937. 2914.75   1
   0  -5  19  25341. 2918.23   1
   0   5 -19  23984. 2885.17   1
   0   5 -19  30209. 2493.39   1
   0  -5  18 7466.94 2513.57   1
   0  -5  18 9672.92 2470.42   1
   0   5 -18  11681. 2356.99   1
   0   5 -18 6412.66 2479.12   1
   0  -5  17 1362.91 2524.01   1
   0  -5  17 7150.31 2428.32   1
   0   5 -17 3723.03 2279.40   1
   0   5 -17 -225.68 2248.78   1
   0  -5  16 7341.68 2468.68   1
   0  -5  16 6398.74 2005.22   1
   0   5 -16 7143.35 1847.95   1
   0   5 -16 7964.50 2266.18   1
   0  -5  15 8931.79 2144.05   1
   0  -5  15  13598. 2064.72   1
   0   5 -15  10174. 1846.55   1
   0   5 -15  13149. 1968.33   1
   0  -5  14  801.32 1805.84   1
   0  -5  14 1426.93 1497.91   1
   0   5 -14  137.37 1472.86   1
   0   5 -14 2834.72 1679.19   1
   0  -5  13 -1645.1 2400.14   1
   0  -5  13  441.54 1760.96   1
   0   5 -13 -2662.8 1695.54   1
   0   5 -13 -2926.9 1795.75   1
   0  -5  12 -2497.2 2103.69   1
   0  -5  12 1369.87 1542.10   1
   0   5 -12 1775.22 1486.78   1
   0   5 -12 3071.33 1918.58   1
   0  -5  11 9669.44 1857.34   1
   0  -5  11 6325.67 2057.76   1
   0   5 -11 8048.01 1961.03   1
   0   5 -11 8775.22 2043.49   1
   0  -5  10 3302.01 1592.55   1
   0  -5  10 2676.41 2091.51   1
   0   5 -10 2770.70 2002.43   1
   0   5 -10 4679.88 1845.86   1
   0  -5   9  12474. 1757.13   1
   0  -5   9 8796.09 1858.38   1
   0   5  -9  13229. 1487.12   1
   0   5  -9  12439. 1918.93   1
   0  -5   8  51914. 2918.93   1
   0  -5   8  45581. 2637.44   1
   0   5  -8  44050. 2599.86   1
   0   5  -8  48852. 2813.85   1
   0  -5   7  23479. 2070.63   1
   0  -5   7  24871. 2265.83   1
   0   5  -7  24047. 1983.99   1
   0   5  -7  23145. 2313.85   1
   0  -5   6 1045.93 1643.35   1
   0  -5   6 1075.16 1764.79   1
   0   5  -6 3439.80 1810.02   1
   0   5  -6  818.72 1799.58   1
   0  -5   5  33344. 2039.66   1
   0  -5   5  31218. 2197.28   1
   0   5  -5  33646. 2297.84   1
   0   5  -5  33027. 2371.61   1
   0  -5   4 1769.66 1775.57   1
   0  -5   4 -1220.6 1927.97   1
   0   5  -4 2936.32 1778.70   1
   0   5  -4 1883.78 1744.95   1
   0  -5   3 3234.51 1827.76   1
   0  -5   3 4655.53 1892.83   1
   0   5  -3 5542.79 1994.43   1
   0   5  -3 4224.07 1615.86   1
   0  -5   2  16120. 1977.03   1
   0  -5   2  17509. 1980.17   1
   0   5  -2  21973. 1862.56   1
   0   5  -2  14718. 2021.22   1
   0  -5   1 110056. 4561.58   1
   0  -5   1 103862. 4290.18   1
   0   5  -1 111308. 4491.99   1
   0   5  -1 106402. 4432.84   1
   0  -5   0 101600. 4224.07   1
   0  -5   0 104280. 4453.72   1
   0   5   0 103723. 4314.54   1
   0   5   0  98852. 4196.24   1
   0  -5  -1  86708. 3917.88   1
   0  -5  -1  91197. 3949.20   1
   0   5   1  88239. 3830.89   1
   0   5   1  86604. 3810.02   1
   0  -5  -2 111204. 4599.86   1
   0  -5  -2 111308. 4495.47   1
   0   5   2 111621. 4575.50   1
   0   5   2 107028. 4558.10   1
   0  -5  -3  74739. 3507.30   1
   0  -5  -3  68998. 3421.71   1
   0   5   3  65310. 3087.68   1
   0   5   3  67397. 3447.46   1
   0  -5  -4 -526.10 1863.95   1
   0  -5  -4 1966.94 1811.41   1
   0   5   4  157.79 1781.49   1
   0   5   4 4888.65 2177.10   1
   0  -5  -5  -999.3 2013.92   1
   0  -5  -5 2599.51 1778.70   1
   0   5   5   48.54 1792.97   1
   0   5   5 3754.35 1495.48   1
   0  -5  -6 6823.24 2043.84   1
   0  -5  -6 7185.10 1974.60   1
   0   5   6 7477.38 1731.04   1
   0   5   6 7327.76 2216.07   1
   0  -5  -7  24690. 2402.57   1
   0  -5  -7  32784. 2664.23   1
   0   5   7  27439. 2212.25   1
   0   5   7  30825. 2672.58   1
   0  -5  -8  17794. 2127.35   1
   0  -5  -8  13278. 2234.17   1
   0   5   8  16566. 1885.87   1
   0   5   8  17857. 1880.30   1
   0  -5  -9  35351. 2709.81   1
   0  -5  -9  36117. 2825.68   1
   0   5   9  36047. 2485.04   1
   0   5   9  33928. 2679.89   1
   0  -5 -10 9787.74 2262.00   1
   0  -5 -10  12808. 2441.19   1
   0   5  10  14896. 1871.26   1
   0   5  10  17046. 2395.27   1
   0  -5 -11  41371. 2868.13   1
   0  -5 -11  39979. 2736.60   1
   0   5  11  40605. 2546.97   1
   0   5  11  43076. 2906.75   1
   0  -5 -12 1981.56 1669.10   1
   0  -5 -12 3304.80 1873.00   1
   0   5  12 6346.55 1784.27   1
   0   5  12 6520.52 2139.18   1
   0  -5 -13  28163. 2562.98   1
   0  -5 -13  28104. 2540.36   1
   0   5  13  26347. 2664.58   1
   0   5  13  29965. 2165.27   1
   0  -5 -14 1573.07 2363.60   1
   0  -5 -14 -1005.2 2299.23   1
   0   5  14 2975.64 1951.63   1
   0   5  14 -411.97 2676.06   1
   0  -5 -15  11726. 2718.86   1
   0  -5 -15 9377.17 2241.82   1
   0   5  15  12582. 2100.21   1
   0   5  15 7418.23 2716.07   1
   0  -5 -16 -1325.7 2234.51   1
   0  -5 -16 1268.61 2382.74   1
   0   5  16  406.05 1827.07   1
   0   5  16 -1500.7 2429.36   1
   0  -5 -17  12025. 2702.50   1
   0  -5 -17 9081.41 2450.59   1
   0   5  17 6628.39 2436.32   1
   0   5  17  11868. 2407.44   1
   0  -5 -18  11173. 2708.42   1
   0  -5 -18  15797. 2674.67   1
   0   5  18  10226. 2601.60   1
   0   5  18 6009.04 2319.76   1
   0  -5 -19 -5723.7 2898.05   1
   0   5  19 2247.39 2465.55   1
   0   5  19  558.45 2757.83   1
   0  -5 -20 2805.84 2827.07   1
   0  -5 -20 5876.82 2975.99   1
   0   5  20 5441.89 2363.60   1
   0   5  20  13292. 2977.03   1
   0  -5 -21  13605. 3392.83   1
   0  -5 -21  11910. 2720.60   1
   0   5  21 9018.78 2687.19   1
   0   5  21 9958.24 2815.24   1
   0  -5 -22  971.12 3147.87   1
   0  -5 -22 5570.63 2018.79   1
   0   5  22 3159.01 2771.40   1
   0   5  22 6499.65 2126.30   1
   0  -5 -23 -634.31 2878.56   1
   0  -5 -23 3792.62 3121.08   1
   0   5  23 2470.77 2378.91   1
   0   5  23 5205.28 2932.15   1
   0  -5 -24 3921.36 2554.97   1
   0  -5 -24 4272.79 3177.80   1
   0   5  24 -500.70 2787.75   1
   0   5  24 2180.93 2664.23   1
   0  -5 -25 -2914.4 3010.78   1
   0  -5 -25 -2300.6 2057.76   1
   0   5  25 3080.02 2633.61   1
   0   5  25 3684.76 2197.98   1
   0  -6  26  11458. 3153.79   1
   0  -6  26 7967.98 3302.71   1
   0   6 -26 7595.68 3653.44   1
   0   6 -26 4582.46 3105.77   1
   0  -6  25 -5619.3 2786.71   1
   0  -6  25 -2007.7 2520.53   1
   0   6 -25 -2195.2 2970.42   1
   0   6 -25  175.78 2434.58   1
   0  -6  24  545.93 2166.66   1
   0  -6  24 1129.09 3054.62   1
   0   6 -24 1406.40 2418.93   1
   0   6 -24 9262.34 2785.66   1
   0  -6  23  539.32 2983.99   1
   0  -6  23 -594.29 2584.90   1
   0   6 -23 -3055.0 2699.02   1
   0   6 -23  909.53 2371.26   1
   0  -6  22 -3698.7 3001.74   1
   0  -6  22 4968.68 2778.70   1
   0   6 -22 5038.27 3070.98   1
   0   6 -22 -669.80 1810.37   1
   0  -6  21 -2626.3 2789.49   1
   0  -6  21 1785.31 2594.99   1
   0   6 -21 3771.74 2813.50   1
   0   6 -21 -1964.2 1711.90   1
   0  -6  20 1728.60 2578.98   1
   0  -6  20  496.87 2690.32   1
   0   6 -20 2257.48 1750.52   1
   0   6 -20 1582.46 2816.63   1
   0  -6  19  25372. 2895.96   1
   0  -6  19  23156. 3097.77   1
   0   6 -19  23201. 2797.84   1
   0   6 -19  20010. 2264.44   1
   0  -6  18  38413. 3274.88   1
   0  -6  18  37683. 3256.09   1
   0   6 -18  32971. 2953.37   1
   0  -6  17  13699. 2737.30   1
   0  -6  17  10939. 2272.09   1
   0   6 -17  11660. 1997.91   1
   0   6 -17  12338. 2447.81   1
   0  -6  16 3604.73 2175.02   1
   0  -6  16 1177.80 2342.38   1
   0   6 -16 -3552.5 1820.11   1
   0   6 -16 2725.12 2552.89   1
   0  -6  15   96.10 1644.05   1
   0  -6  15 -882.05 1875.78   1
   0   6 -15  314.02 1867.08   1
   0   6 -15 2122.13 1977.03   1
   0  -6  14 4011.83 2077.94   1
   0  -6  14 4843.42 2187.89   1
   0   6 -14 6513.56 1902.57   1
   0   6 -14 6663.18 1838.20   1
   0  -6  13 3907.44 1982.95   1
   0  -6  13 4812.10 1680.23   1
   0   6 -13 4401.53 1842.38   1
   0   6 -13 2144.74 1786.36   1
   0  -6  12  403.62 1786.01   1
   0  -6  12  610.30 1505.91   1
   0   6 -12  -48.64 1903.62   1
   0   6 -12 2415.79 1743.56   1
   0  -6  11 4787.75 1856.64   1
   0  -6  11 3750.87 1525.05   1
   0   6 -11 2606.82 1813.50   1
   0   6 -11 3938.76 1973.55   1
   0  -6  10 2081.77 1722.68   1
   0  -6  10 3542.10 1831.59   1
   0   6 -10 7487.81 1847.95   1
   0   6 -10  341.02 1867.43   1
   0  -6   9  65832. 3167.01   1
   0  -6   9  62909. 3194.50   1
   0   6  -9  65066. 3203.20   1
   0   6  -9  64544. 3267.57   1
   0  -6   8 1494.08 1659.01   1
   0  -6   8 -913.71 1883.09   1
   0   6  -8 -605.08 1755.39   1
   0   6  -8 -1710.5 1727.21   1
   0  -6   7  12731. 1851.42   1
   0  -6   7  12164. 1744.95   1
   0   6  -7  10765. 1889.35   1
   0   6  -7  10661. 1891.79   1
   0  -6   6 7543.49 1920.32   1
   0  -6   6 4561.58 1742.17   1
   0   6  -6 5535.83 1815.93   1
   0   6  -6 3729.99 1840.64   1
   0  -6   5  30504. 2342.73   1
   0  -6   5  27129. 2159.36   1
   0   6  -5  28344. 2390.05   1
   0   6  -5  29718. 2094.99   1
   0  -6   4  81489. 3649.96   1
   0  -6   4  89979. 3956.15   1
   0   6  -4  91858. 3952.68   1
   0   6  -4  83333. 3862.21   1
   0  -6   3 4088.37 1797.15   1
   0  -6   3 4888.65 1797.84   1
   0   6  -3 6506.60 1863.95   1
   0   6  -3 9773.83 1854.90   1
   0  -6   2  57481. 2919.97   1
   0  -6   2  55602. 2859.43   1
   0   6  -2  59221. 2919.62   1
   0   6  -2  52644. 2913.36   1
   0  -6   1  80341. 3615.17   1
   0  -6   1  69972. 3171.88   1
   0   6  -1  73695. 3325.33   1
   0   6  -1  74391. 3507.30   1
   0  -6   0  36952. 2577.94   1
   0  -6   0  37404. 2257.83   1
   0   6   0  35595. 2411.62   1
   0   6   0  38239. 2390.74   1
   0  -6  -1 9370.21 1911.62   1
   0  -6  -1  12651. 1772.44   1
   0   6   1  11761. 1863.95   1
   0   6   1  13006. 1885.87   1
   0  -6  -2  12784. 1856.99   1
   0  -6  -2  11089. 2005.22   1
   0   6   2 9547.66 1736.95   1
   0   6   2 6990.25 1956.85   1
   0  -6  -3  56820. 2983.30   1
   0  -6  -3  51531. 2837.16   1
   0   6   3  52714. 2744.95   1
   0   6   3  47182. 2919.62   1
   0  -6  -4  77453. 3538.62   1
   0  -6  -4  76583. 3453.37   1
   0   6   4  75783. 3576.89   1
   0   6   4  79401. 3524.70   1
   0  -6  -5 -798.89 1763.39   1
   0  -6  -5 1526.79 1867.78   1
   0   6   5 3369.86 1731.73   1
   0   6   5 1410.92 1844.47   1
   0  -6  -6 110369. 4690.32   1
   0  -6  -6 111204. 4613.77   1
   0   6   6 111169. 4714.68   1
   0   6   6 112526. 4620.73   1
   0  -6  -7  72999. 3507.30   1
   0  -6  -7  73695. 3252.61   1
   0   6   7  72999. 3464.51   1
   0   6   7  71260. 3396.66   1
   0  -6  -8  28928. 2653.79   1
   0  -6  -8  28827. 2550.45   1
   0   6   8  23420. 2197.63   1
   0   6   8  31214. 2681.63   1
   0  -6  -9 -2083.9 1989.21   1
   0  -6  -9 4109.25 2114.47   1
   0   6   9 -562.98 1797.15   1
   0   6   9 3343.77 2223.38   1
   0  -6 -10 1121.78 1963.81   1
   0  -6 -10  439.46 2232.43   1
   0   6  10 2973.55 1699.72   1
   0   6  10 -688.24 2230.69   1
   0  -6 -11 1415.80 2299.93   1
   0  -6 -11 1793.32 1972.16   1
   0   6  11 3542.10 1789.49   1
   0   6  11 4175.36 2329.50   1
   0  -6 -12 6033.40 1799.93   1
   0  -6 -12 -122.76 2119.34   1
   0   6  12 -283.68 1957.55   1
   0   6  12  419.28 1734.17   1
   0  -6 -13 3921.36 2186.85   1
   0  -6 -13 6670.14 2475.64   1
   0   6  13 6405.70 2644.05   1
   0   6  13 5657.61 1929.71   1
   0  -6 -14 2609.60 1858.04   1
   0  -6 -14 1527.49 2641.96   1
   0   6  14 3601.25 1994.08   1
   0   6  14 3597.77 2232.43   1
   0  -6 -15  16207. 3013.57   1
   0  -6 -15  13921. 2557.06   1
   0   6  15  16284. 3230.69   1
   0   6  15  17763. 2633.61   1
   0  -6 -16 -1092.2 3006.96   1
   0  -6 -16 -3315.9 2667.36   1
   0   6  16 2396.66 2355.60   1
   0   6  16 -1815.6 3001.74   1
   0  -6 -17 1815.93 2610.64   1
   0  -6 -17 7783.57 2813.15   1
   0   6  17 6892.83 2370.21   1
   0   6  17 5668.05 2989.56   1
   0  -6 -18 -5219.2 2942.24   1
   0  -6 -18 4352.81 2765.48   1
   0   6  18 2092.90 2449.55   1
   0   6  18 1979.47 2935.97   1
   0  -6 -19 2894.22 3012.52   1
   0  -6 -19 5567.15 2723.73   1
   0   6  19 7223.38 2604.03   1
   0   6  19 3531.66 2832.29   1
   0  -6 -20 -142.90 2835.42   1
   0  -6 -20 2471.12 3120.73   1
   0   6  20 4182.32 2572.02   1
   0   6  20  226.83 2906.05   1
   0  -6 -21 4091.85 2485.38   1
   0  -6 -21 4474.60 3019.48   1
   0   6  21 1724.08 2314.54   1
   0   6  21 -3552.5 2662.49   1
   0  -6 -22  14694. 3296.80   1
   0  -6 -22  10303. 2257.48   1
   0   6  22 8284.61 2185.11   1
   0   6  22  11051. 2874.74   1
   0  -6 -23  210.65 3322.54   1
   0  -6 -23  317.05 3117.26   1
   0   6  23 1246.69 2748.78   1
   0   6  23 7682.67 2838.20   1
   0  -6 -24 1754.35 3136.39   1
   0  -6 -24 -6151.7 2990.60   1
   0   6  24 2046.28 3069.24   1
   0   6  24  329.30 2785.66   1
   0  -7  26 3681.28 3286.71   1
   0  -7  26 -409.53 2767.92   1
   0   7 -26 -2140.2 3163.18   1
   0   7 -26 -625.61 3195.20   1
   0  -7  25 1544.88 2942.93   1
   0  -7  25 4478.07 3070.28   1
   0   7 -25 6165.62 3466.94   1
   0   7 -25 -4606.8 3264.09   1
   0  -7  24 5542.79 2633.61   1
   0  -7  24  302.57 2846.20   1
   0   7 -24 -5431.4 3105.77   1
   0   7 -24 -1486.1 2801.67   1
   0  -7  23 -790.19 2392.83   1
   0  -7  23 -2633.6 2487.12   1
   0   7 -23 -2835.4 2850.73   1
   0   7 -23 2586.64 2542.80   1
   0  -7  22  580.38 1907.10   1
   0  -7  22 2448.15 2514.26   1
   0   7 -22 -759.22 2465.55   1
   0   7 -22 -548.02 2438.06   1
   0  -7  21 2199.72 1949.89   1
   0  -7  21 -246.10 2345.51   1
   0   7 -21 2553.93 1905.70   1
   0   7 -21 5031.31 2387.61   1
   0  -7  20  25845. 2922.41   1
   0  -7  20  25313. 2316.63   1
   0   7 -20  31997. 2849.34   1
   0   7 -20  31660. 2393.87   1
   0  -7  19  11747. 2056.02   1
   0  -7  19 9352.81 2712.25   1
   0   7 -19  11444. 1975.64   1
   0   7 -19  15414. 2946.07   1
   0  -7  18  19955. 2700.07   1
   0  -7  18  17547. 2068.89   1
   0   7 -18  16141. 2824.28   1
   0   7 -18  20640. 2429.02   1
   0  -7  17  30752. 2909.88   1
   0  -7  17  31284. 2974.25   1
   0   7 -17  28577. 2711.90   1
   0   7 -17  31096. 2975.99   1
   0  -7  16  48539. 2960.68   1
   0  -7  16  50905. 3402.92   1
   0   7 -16  53758. 3156.57   1
   0   7 -16  51322. 3307.23   1
   0  -7  15 5052.19 2280.79   1
   0  -7  15 -1087.0 1669.45   1
   0   7 -15 6753.65 1882.74   1
   0   7 -15 2896.66 2619.69   1
   0  -7  14 4728.60 1951.29   1
   0  -7  14 5424.49 2299.23   1
   0   7 -14 6085.59 2003.48   1
   0   7 -14 6210.85 2083.51   1
   0  -7  13 -815.94 1882.74   1
   0  -7  13 -340.71 1837.16   1
   0   7 -13 2173.62 1955.46   1
   0   7 -13 -353.17 2131.52   1
   0  -7  12  32015. 2092.90   1
   0  -7  12  31802. 2347.25   1
   0   7 -12  32443. 2288.45   1
   0   7 -12  34221. 2510.44   1
   0  -7  11 3125.61 1802.36   1
   0  -7  11 6833.67 1437.37   1
   0   7 -11 6099.51 2073.41   1
   0   7 -11 4157.96 1512.18   1
   0  -7  10  10494. 1747.04   1
   0  -7  10  10181. 1723.03   1
   0   7 -10  12766. 1832.98   1
   0   7 -10  13163. 1914.40   1
   0  -7   9  14158. 1990.26   1
   0  -7   9  15296. 2055.32   1
   0   7  -9  12992. 2018.44   1
   0   7  -9  16148. 1950.94   1
   0  -7   8  33556. 2219.20   1
   0  -7   8  32693. 2326.02   1
   0   7  -8  33017. 2419.97   1
   0   7  -8  29899. 2144.05   1
   0  -7   7 103688. 4387.61   1
   0  -7   7  95859. 4074.46   1
   0   7  -7  94433. 4081.42   1
   0   7  -7  89735. 3956.15   1
   0  -7   6  55567. 2860.82   1
   0   7  -6  61343. 3081.07   1
   0   7  -6  56715. 3074.11   1
   0  -7   5  43772. 2752.61   1
   0  -7   5  43563. 2568.20   1
   0   7  -5  41649. 2514.61   1
   0   7  -5  50939. 2934.93   1
   0  -7   4  13038. 1995.47   1
   0  -7   4  15056. 2014.61   1
   0   7  -4  14165. 1824.63   1
   0   7  -4  14429. 2027.83   1
   0  -7   3 8649.96 1776.27   1
   0  -7   3 8413.35 1826.37   1
   0   7  -3 9791.22 1563.67   1
   0   7  -3 8114.12 1999.30   1
   0  -7   2  40745. 2504.87   1
   0  -7   2  33065. 2322.20   1
   0   7  -2  35282. 2478.08   1
   0   7  -2  35699. 2185.45   1
   0  -7   1 1027.14 1825.33   1
   0  -7   1 -430.41 1616.21   1
   0   7  -1  443.98 1615.86   1
   0   7  -1 -679.19 1953.37   1
   0  -7   0 5619.34 1909.18   1
   0  -7   0 5932.49 1787.05   1
   0   7   0 2226.86 1688.24   1
   0   7   0 4450.24 1823.59   1
   0  -7  -1 117293. 4770.35   1
   0  -7  -1 121016. 4958.24   1
   0   7   1 117119. 4742.51   1
   0   7   1 123660. 5027.83   1
   0  -7  -2 1550.10 1919.27   1
   0  -7  -2 1895.61 1568.20   1
   0   7   2 -319.31 1669.45   1
   0   7   2 1311.06 1855.25   1
   0  -7  -3  68650. 3348.99   1
   0  -7  -3  74321. 3510.78   1
   0   7   3  71538. 3276.61   1
   0   7   3  69485. 3562.98   1
   0  -7  -4 -660.05 1735.21   1
   0  -7  -4  -13.30 1931.45   1
   0   7   4 -321.68 1441.54   1
   0   7   4 -2709.1 1877.87   1
   0  -7  -5 -170.11 1511.83   1
   0  -7  -5 -574.11 1932.84   1
   0   7   5 -146.38 1500.00   1
   0   7   5 -953.37 1551.84   1
   0  -7  -6  17568. 2066.46   1
   0  -7  -6  16343. 1988.52   1
   0   7   6  13591. 2264.09   1
   0   7   6  17042. 1991.65   1
   0  -7  -7  24878. 2364.65   1
   0  -7  -7  27874. 2236.95   1
   0   7   7  25024. 2257.83   1
   0   7   7  27582. 2394.57   1
   0  -7  -8  11186. 2004.17   1
   0  -7  -8 8228.94 2080.72   1
   0   7   8  11291. 1865.69   1
   0   7   8  14008. 2364.30   1
   0  -7  -9 6252.60 2154.83   1
   0  -7  -9 -1232.8 1853.86   1
   0   7   9 2932.50 1708.42   1
   0   7   9 -1097.4 2216.42   1
   0  -7 -10 5842.03 1964.51   1
   0  -7 -10 6652.74 2547.32   1
   0   7  10 3945.72 1852.12   1
   0   7  10 4693.80 2388.31   1
   0  -7 -11 1090.47 2254.70   1
   0  -7 -11  761.66 2322.54   1
   0   7  11 1577.59 1827.42   1
   0   7  11  672.93 2235.91   1
   0  -7 -12 3464.51 1769.31   1
   0  -7 -12 2213.64 2475.64   1
   0   7  12 4714.68 1956.50   1
   0   7  12 5212.24 1850.38   1
   0  -7 -13 7446.06 2747.04   1
   0  -7 -13 9314.54 2748.08   1
   0   7  13 3764.78 2214.68   1
   0   7  13 7707.02 2949.20   1
   0  -7 -14 8100.20 2886.57   1
   0  -7 -14 5292.27 2015.66   1
   0   7  14 5344.46 2191.37   1
   0   7  14 2286.01 2383.44   1
   0  -7 -15 1542.45 2593.94   1
   0  -7 -15 -585.94 2358.04   1
   0   7  15 -2033.7 2360.12   1
   0   7  15 2319.41 2174.67   1
   0  -7 -16  16931. 3199.72   1
   0  -7 -16  10139. 2789.14   1
   0   7  16  14290. 2728.95   1
   0   7  16 9450.23 3200.41   1
   0  -7 -17  11983. 2822.20   1
   0  -7 -17  12196. 3084.20   1
   0   7  17 8997.90 2513.92   1
   0   7  17  11413. 3328.81   1
   0  -7 -18 5549.75 2922.41   1
   0  -7 -18  933.89 2710.85   1
   0   7  18 -1066.1 2547.32   1
   0   7  18 1825.68 3067.85   1
   0  -7 -19  -16.28 3071.33   1
   0  -7 -19 -4328.5 2842.38   1
   0   7  19 1015.31 2687.19   1
   0   7  19 2315.59 3081.07   1
   0  -7 -20  11180. 2750.87   1
   0  -7 -20 -344.61 3036.88   1
   0   7  20  10922. 2853.86   1
   0   7  20 7508.69 3045.23   1
   0  -7 -21 2844.81 2997.56   1
   0  -7 -21 -791.58 2885.87   1
   0   7  21 -2013.6 2755.74   1
   0   7  21 -1915.4 2987.47   1
   0  -7 -22 -3545.6 2756.43   1
   0  -7 -22 2099.51 3013.57   1
   0   7  22 2776.27 2722.34   1
   0   7  22 3733.47 2527.83   1
   0  -7 -23 9906.04 3309.67   1
   0  -7 -23 6645.78 2313.85   1
   0   7  23 9624.21 2689.98   1
   0   7  23  12303. 2292.27   1
   0  -8  25 2589.07 3129.78   1
   0  -8  25 -740.78 2959.29   1
   0   8 -25 7940.15 3466.59   1
   0   8 -25  789.49 2936.32   1
   0  -8  24 1278.70 2914.40   1
   0  -8  24 6374.38 2940.15   1
   0   8 -24 5347.94 3085.59   1
   0   8 -24 2577.59 3331.24   1
   0  -8  23 5473.20 2903.62   1
   0  -8  23 1549.41 2802.36   1
   0   8 -23 -1179.5 2871.95   1
   0   8 -23 3344.12 2970.07   1
   0  -8  22 -2482.3 2826.02   1
   0  -8  22 1797.84 2492.34   1
   0   8 -22 2139.87 2695.54   1
   0   8 -22 -113.74 2805.84   1
   0  -8  21  20598. 2713.64   1
   0  -8  21  21023. 2977.73   1
   0   8 -21  19520. 2749.48   1
   0   8 -21  20626. 3001.04   1
   0  -8  20 -1664.6 2592.20   1
   0  -8  20 2837.16 2545.23   1
   0   8 -20 4784.27 2464.51   1
   0   8 -20 5006.95 2655.88   1
   0  -8  19 6910.22 2609.60   1
   0  -8  19 9220.59 2589.77   1
   0   8 -19 7132.91 2641.26   1
   0   8 -19 6990.25 2447.81   1
   0  -8  18 2044.54 2354.90   1
   0  -8  18 -3255.7 2566.11   1
   0   8 -18 1820.11 2426.93   1
   0   8 -18 3277.66 2554.28   1
   0  -8  17  11072. 2601.95   1
   0  -8  17 5594.98 2501.04   1
   0   8 -17 7376.47 2082.81   1
   0   8 -17 5615.86 2657.27   1
   0  -8  16 4690.32 2184.41   1
   0  -8  16  549.41 2317.33   1
   0   8 -16 3127.00 2003.13   1
   0   8 -16 2151.70 2431.45   1
   0  -8  15  23319. 2542.10   1
   0  -8  15  27909. 2869.52   1
   0   8 -15  25452. 2543.14   1
   0   8 -15  24948. 2925.88   1
   0  -8  14  22902. 2560.89   1
   0  -8  14  18372. 1962.77   1
   0   8 -14  17857. 2100.90   1
   0   8 -14  24930. 2919.97   1
   0  -8  13  814.54 2204.24   1
   0  -8  13 2930.06 2100.21   1
   0   8 -13 2361.17 1743.21   1
   0   8 -13 1943.98 2278.36   1
   0  -8  12 -2803.8 2075.85   1
   0  -8  12 1261.31 1937.72   1
   0   8 -12 2291.58 1967.99   1
   0   8 -12 2266.87 1964.51   1
   0  -8  11 6520.52 1873.00   1
   0  -8  11 1863.95 1837.51   1
   0   8 -11 4432.84 1963.46   1
   0   8 -11 7741.82 1858.73   1
   0  -8  10  369.87 1731.73   1
   0  -8  10 -1220.6 1876.48   1
   0   8 -10 -119.94 1884.13   1
   0   8 -10 2541.75 1993.73   1
   0  -8   9 9084.89 1827.76   1
   0  -8   9 9662.48 1980.51   1
   0   8  -9 7233.81 1778.36   1
   0   8  -9 7258.17 1935.98   1
   0  -8   8 2621.08 1727.90   1
   0  -8   8 3323.24 1780.10   1
   0   8  -8 -590.81 1575.85   1
   0   8  -8 1258.52 1821.85   1
   0  -8   7  36256. 2405.01   1
   0  -8   7  33601. 2262.00   1
   0   8  -7  35003. 2360.82   1
   0   8  -7  32902. 2488.86   1
   0  -8   6  67954. 3375.08   1
   0  -8   6  69067. 3303.41   1
   0   8  -6  69972. 3279.05   1
   0   8  -6  71399. 3507.30   1
   0  -8   5 167850. 6457.89   1
   0  -8   5 174878. 6736.25   1
   0   8  -5 179158. 6791.92   1
   0   8  -5 167432. 6506.60   1
   0  -8   4  373.69 1733.47   1
   0  -8   4 1809.67 1811.06   1
   0   8  -4 -812.46 1619.69   1
   0   8  -4 1097.42 1844.12   1
   0  -8   3  57342. 2976.34   1
   0  -8   3  50313. 2771.74   1
   0   8  -3  53967. 2974.60   1
   0   8  -3  54593. 2735.21   1
   0  -8   2 3018.44 1735.21   1
   0  -8   2 4958.24 1759.91   1
   0   8  -2 1950.94 1698.33   1
   0   8  -2 3890.05 1816.63   1
   0  -8   1  12081. 1910.92   1
   0  -8   1 6753.65 1827.07   1
   0   8  -1  11420. 1822.55   1
   0   8  -1  13897. 1969.38   1
   0  -8   0  22662. 2046.62   1
   0  -8   0  24548. 2318.37   1
   0   8   0  24586. 2130.13   1
   0   8   0  17533. 2040.71   1
   0  -8  -1 3514.26 1842.03   1
   0  -8  -1 4217.11 1780.10   1
   0   8   1 2314.54 1687.89   1
   0   8   1 4384.13 1840.29   1
   0  -8  -2  27234. 2401.53   1
   0  -8  -2  27999. 2263.39   1
   0   8   2  27999. 2183.37   1
   0   8   2  29043. 2463.46   1
   0  -8  -3  81037. 3736.95   1
   0  -8  -3  78079. 3625.61   1
   0   8   3  81420. 3636.04   1
   0   8   3  87230. 4088.37   1
   0  -8  -4  16374. 1840.29   1
   0  -8  -4  16367. 2039.32   1
   0   8   4  15950. 1916.49   1
   0   8   4  15616. 2185.11   1
   0  -8  -5  62422. 3169.45   1
   0  -8  -5  65658. 3272.44   1
   0   8   5  65971. 3569.93   1
   0   8   5  60752. 3057.06   1
   0  -8  -6 1537.58 1771.74   1
   0  -8  -6 5584.55 1583.85   1
   0   8   6 2202.50 1608.21   1
   0   8   6 3806.54 2079.33   1
   0  -8  -7  50939. 2977.38   1
   0  -8  -7  49652. 2713.64   1
   0   8   7  46903. 2513.57   1
   0   8   7  48817. 2951.98   1
   0  -8  -8 2662.14 1954.42   1
   0  -8  -8 5198.32 1838.20   1
   0   8   8 1311.41 1585.94   1
   0   8   8 2784.97 2051.49   1
   0  -8  -9 7738.34 2025.75   1
   0  -8  -9  13633. 2244.95   1
   0   8   9  12060. 1944.33   1
   0   8   9  16754. 2308.97   1
   0  -8 -10    1.86 2077.24   1
   0  -8 -10 2211.55 1950.94   1
   0   8  10 -1488.2 2051.49   1
   0   8  10  594.64 1725.47   1
   0  -8 -11 -633.96 2372.65   1
   0  -8 -11  869.87 2323.24   1
   0   8  11 -1717.5 2209.46   1
   0   8  11 -2306.5 2535.84   1
   0  -8 -12 -1855.9 2688.58   1
   0  -8 -12 1073.07 2486.08   1
   0   8  12  575.50 2271.40   1
   0   8  12 2812.45 2709.81   1
   0  -8 -13  22533. 2906.75   1
   0  -8 -13  24628. 2869.52   1
   0   8  13  18580. 2836.11   1
   0   8  13  26333. 2796.45   1
   0  -8 -14  23692. 2963.46   1
   0  -8 -14  20292. 2786.01   1
   0   8  14  21534. 2762.35   1
   0   8  14  24123. 3112.04   1
   0  -8 -15  12968. 2802.36   1
   0  -8 -15  13918. 2986.08   1
   0   8  15  11938. 2576.55   1
   0   8  15  10028. 3074.11   1
   0  -8 -16 -1101.9 2405.01   1
   0  -8 -16 2459.98 3167.36   1
   0   8  16 4749.47 2643.70   1
   0   8  16 4826.02 3109.60   1
   0  -8 -17 7880.99 2875.43   1
   0  -8 -17 5114.82 1993.39   1
   0   8  17 8674.31 2489.56   1
   0   8  17 2594.99 2870.56   1
   0  -8 -18 -2458.6 3020.53   1
   0  -8 -18 -125.12 1923.45   1
   0   8  18 -5354.9 2667.71   1
   0   8  18 3463.11 2472.16   1
   0  -8 -19  20358. 2216.07   1
   0  -8 -19  21893. 3396.66   1
   0   8  19  24415. 3085.94   1
   0   8  19  20950. 2525.40   1
   0  -8 -20 -2737.6 2057.41   1
   0  -8 -20 -1781.1 3115.17   1
   0   8  20 2012.18 2758.17   1
   0   8  20  978.77 2187.54   1
   0  -8 -21 4620.73 3127.69   1
   0  -8 -21 -1107.9 2852.82   1
   0   8  21 -130.69 2374.39   1
   0   8  21 2147.88 2764.79   1
   0  -8 -22 -886.22 3205.98   1
   0  -8 -22 -2057.8 2724.42   1
   0   8  22 6778.00 3261.31   1
   0   8  22 -133.09 2825.68   1
   0  -9  24  10480. 2981.21   1
   0  -9  24 7146.83 2877.17   1
   0   9 -24 5706.33 3110.64   1
   0   9 -24  12394. 3122.82   1
   0  -9  23 8246.34 2679.54   1
   0  -9  23 6610.99 2872.30   1
   0   9 -23 3111.69 2628.04   1
   0   9 -23 9185.79 3217.46   1
   0  -9  22 7606.12 2758.17   1
   0  -9  22 3959.63 2585.94   1
   0   9 -22  10397. 2562.28   1
   0   9 -22 5574.11 3133.61   1
   0  -9  21 -3187.2 2825.68   1
   0  -9  21 2346.55 2455.81   1
   0   9 -21 1586.99 2523.66   1
   0   9 -21 2493.39 2835.07   1
   0  -9  20 2299.93 2381.00   1
   0  -9  20 -778.70 2622.82   1
   0   9 -20  331.45 2421.36   1
   0   9 -20 2951.63 2804.80   1
   0  -9  19 -2430.8 2674.32   1
   0  -9  19 1888.31 2526.44   1
   0   9 -19  752.26 2407.10   1
   0   9 -19 2058.11 2831.59   1
   0  -9  18  626.65 2375.43   1
   0  -9  18  388.31 2669.45   1
   0   9 -18 -972.16 2575.15   1
   0   9 -18 1090.12 2408.49   1
   0  -9  17 1636.05 2301.32   1
   0  -9  17 5080.02 2403.27   1
   0   9 -17 3656.92 1659.36   1
   0   9 -17  759.57 2546.97   1
   0  -9  16 -1851.1 2313.85   1
   0  -9  16 1589.77 2212.59   1
   0   9 -16 -826.37 2119.34   1
   0   9 -16 1522.27 2473.90   1
   0  -9  15 3858.73 2555.67   1
   0  -9  15 1688.24 2277.31   1
   0   9 -15 7748.77 2440.85   1
   0   9 -15 6704.93 2426.23   1
   0  -9  14 9725.11 2321.15   1
   0  -9  14  17199. 1973.21   1
   0   9 -14  16580. 2191.02   1
   0   9 -14  14739. 2574.46   1
   0  -9  13  26614. 2497.56   1
   0  -9  13  29537. 2728.25   1
   0   9 -13  26653. 2439.80   1
   0   9 -13  30160. 2798.88   1
   0  -9  12 -3006.3 1879.61   1
   0  -9  12 2705.98 2045.93   1
   0   9 -12 -153.93 1817.67   1
   0   9 -12 -1295.4 2130.13   1
   0  -9  11  10351. 1639.18   1
   0  -9  11 9659.00 1859.78   1
   0   9 -11 9231.03 1836.12   1
   0   9 -11  11635. 2343.42   1
   0  -9  10 -1399.8 1768.27   1
   0  -9  10 -1026.1 1346.90   1
   0   9 -10 2182.32 1967.99   1
   0   9 -10  826.03 1609.95   1
   0  -9   9 4815.58 1885.18   1
   0  -9   9 -332.92 1342.38   1
   0   9  -9  140.99 1627.35   1
   0   9  -9 2381.35 2014.61   1
   0  -9   8 8615.16 1929.36   1
   0  -9   8 3194.85 1498.95   1
   0   9  -8 2248.43 1544.88   1
   0   9  -8 8061.93 2295.06   1
   0  -9   7 2403.96 1653.10   1
   0  -9   7 5640.22 1789.14   1
   0   9  -7 1582.46 1826.37   1
   0   9  -7 1246.00 1897.01   1
   0  -9   6 4210.16 1991.30   1
   0  -9   6 4356.29 1780.10   1
   0   9  -6 3026.09 1757.83   1
   0   9  -6 7077.24 2055.67   1
   0  -9   5 -470.77 1829.50   1
   0  -9   5 -382.39 1673.62   1
   0   9  -5 2551.49 1595.68   1
   0   9  -5 2404.31 1867.78   1
   0  -9   4 127244. 5097.42   1
   0  -9   4 123104. 5045.23   1
   0   9  -4 124530. 4979.12   1
   0   9  -4 127453. 5191.37   1
   0  -9   3  13838. 1815.59   1
   0  -9   3  10546. 2018.44   1
   0   9  -3  13239. 1963.46   1
   0   9  -3  10223. 1899.79   1
   0  -9   2  17912. 2020.18   1
   0  -9   2  17825. 1854.21   1
   0   9  -2  18960. 2168.06   1
   0   9  -2  20376. 1926.23   1
   0  -9   1 -510.79 1660.75   1
   0  -9   1 2895.61 1759.57   1
   0   9  -1  761.31 1532.36   1
   0   9  -1 1838.55 1818.37   1
   0  -9   0  74983. 3524.70   1
   0  -9   0  81767. 3719.55   1
   0   9   0  74948. 3437.02   1
   0   9   0  86256. 3917.88   1
   0  -9  -1  16308. 1931.80   1
   0  -9  -1  15463. 2030.62   1
   0   9   1  16601. 1919.97   1
   0   9   1  18862. 2181.28   1
   0  -9  -2 1773.14 1822.55   1
   0  -9  -2 -1575.5 1829.50   1
   0   9   2 2062.28 1685.45   1
   0   9   2 1048.02 2053.23   1
   0  -9  -3  11399. 2084.90   1
   0  -9  -3  13914. 1858.73   1
   0   9   3 9530.26 1807.58   1
   0   9   3 9860.81 2174.67   1
   0  -9  -4 2337.85 1800.97   1
   0  -9  -4   34.34 1805.50   1
   0   9   4  113.60 1664.58   1
   0   9   4 1735.21 2187.54   1
   0  -9  -5 9787.74 2017.40   1
   0  -9  -5 6224.77 1972.51   1
   0   9   5 8030.61 1661.10   1
   0   9   5 9756.43 2369.52   1
   0  -9  -6 -252.47 1897.35   1
   0  -9  -6 1147.53 1951.98   1
   0   9   6 -5243.6 2235.91   1
   0   9   6 -134.31 1650.31   1
   0  -9  -7 5427.97 1961.72   1
   0  -9  -7 4759.91 2075.50   1
   0   9   7 4001.39 1757.83   1
   0   9   7 7720.94 2393.87   1
   0  -9  -8  29749. 2612.73   1
   0  -9  -8  30678. 2597.07   1
   0   9   8  33392. 2640.92   1
   0   9   8  31632. 2861.86   1
   0  -9  -9 6781.48 2335.42   1
   0  -9  -9 6530.96 2253.65   1
   0   9   9 8141.95 2061.24   1
   0   9   9 9874.73 2471.12   1
   0  -9 -10 7219.90 2374.39   1
   0  -9 -10  10150. 1895.61   1
   0   9  10 9516.34 2174.67   1
   0   9  10 9439.80 2416.14   1
   0  -9 -11 -2278.4 2388.31   1
   0  -9 -11 3903.96 2761.31   1
   0   9  11  448.85 2194.50   1
   0   9  11 1447.11 2740.78   1
   0  -9 -12 2527.83 2396.31   1
   0  -9 -12 2255.04 2452.68   1
   0   9  12 1892.83 2251.56   1
   0   9  12  370.22 2320.46   1
   0  -9 -13  21221. 3090.81   1
   0  -9 -13  13810. 2750.52   1
   0   9  13  16360. 2610.30   1
   0   9  13  13205. 3008.00   1
   0  -9 -14 -541.06 2698.68   1
   0  -9 -14 3215.72 2097.08   1
   0   9  14 4986.08 2149.62   1
   0   9  14 2059.15 2561.93   1
   0  -9 -15  11336. 2893.18   1
   0  -9 -15  10177. 2638.13   1
   0   9  15  13525. 2767.22   1
   0   9  15 9655.52 3009.04   1
   0  -9 -16 5309.67 3111.34   1
   0  -9 -16 6826.72 3105.08   1
   0   9  16 1120.39 2544.19   1
   0   9  16 7874.04 4095.33   1
   0  -9 -17 3820.46 2886.57   1
   0  -9 -17 9394.56 2983.99   1
   0   9  17 5017.39 2702.15   1
   0   9  17 3848.29 3475.64   1
   0  -9 -18 -2432.5 2947.46   1
   0  -9 -18 1992.34 2661.79   1
   0   9  18 5327.07 2716.77   1
   0   9  18 -2008.0 3201.11   1
   0  -9 -19 2271.74 3129.09   1
   0  -9 -19 4408.49 2797.49   1
   0   9  19 2057.76 2705.29   1
   0   9  19 5668.05 3209.11   1
   0  -9 -20 -1425.5 3232.08   1
   0  -9 -20  11754. 3143.70   1
   0   9  20 1647.18 2615.52   1
   0   9  20 5365.34 2869.87   1
   0  -9 -21 4937.36 3098.81   1
   0  -9 -21 -127.80 3036.88   1
   0   9  21 1638.83 3067.15   1
   0   9  21 4498.95 3015.31   1
   0 -10  23 6590.11 2943.63   1
   0 -10  23 6851.07 2686.15   1
   0  10 -23 4405.01 2934.24   1
   0  10 -23 3209.46 2539.66   1
   0 -10  22 5782.88 2893.87   1
   0 -10  22 6356.99 2707.72   1
   0  10 -22 5796.79 2312.45   1
   0  10 -22 4505.91 3171.53   1
   0 -10  21 6457.89 2323.94   1
   0 -10  21 5149.61 2502.78   1
   0  10 -21 6388.30 2240.08   1
   0  10 -21 6315.23 2798.19   1
   0 -10  20 6670.14 1995.82   1
   0 -10  20 8096.72 2799.93   1
   0  10 -20 2952.68 1918.23   1
   0  10 -20 3611.69 2765.83   1
   0 -10  19 2185.45 2510.09   1
   0 -10  19 -1424.1 1955.46   1
   0  10 -19 2106.12 2337.16   1
   0  10 -19 -4982.6 2803.06   1
   0 -10  18 -3987.5 2434.24   1
   0 -10  18 -2559.1 2517.39   1
   0  10 -18 -819.07 2204.59   1
   0  10 -18 -995.48 2679.54   1
   0 -10  17  12450. 2715.03   1
   0 -10  17  10842. 2484.69   1
   0  10 -17  11301. 2739.73   1
   0 -10  16  962.42 2470.42   1
   0 -10  16 2259.22 2303.06   1
   0  10 -16   63.22 1674.32   1
   0  10 -16 2099.86 2408.49   1
   0 -10  15  782.88 2208.42   1
   0 -10  15  944.33 2149.27   1
   0  10 -15 -4819.1 2400.14   1
   0  10 -15  562.28 2222.34   1
   0 -10  14 1934.24 2435.98   1
   0  10 -14 7477.38 2300.97   1
   0  10 -14  389.35 2415.45   1
   0 -10  13  13295. 2359.43   1
   0 -10  13  10745. 1858.04   1
   0  10 -13  13406. 2216.42   1
   0  10 -13  10341. 2490.95   1
   0 -10  12  32237. 2529.92   1
   0 -10  12  31148. 2621.43   1
   0  10 -12  29214. 2247.04   1
   0  10 -12  31211. 2873.69   1
   0 -10  11  40849. 2856.64   1
   0 -10  11  39666. 2752.61   1
   0  10 -11  47147. 3002.08   1
   0  10 -11  34120. 2891.09   1
   0 -10  10   44.82 2052.89   1
   0 -10  10 1381.35 1517.40   1
   0  10 -10 -488.87 1715.38   1
   0  10 -10 3279.75 2305.15   1
   0 -10   9 2716.42 1502.43   1
   0 -10   9 6868.47 2104.73   1
   0  10  -9 2676.41 1586.29   1
   0  10  -9 -237.65 2185.45   1
   0 -10   8  29736. 2000.35   1
   0 -10   8  37509. 2581.07   1
   0  10  -8  34168. 2260.61   1
   0  10  -8  33963. 2707.72   1
   0 -10   7  32133. 2425.19   1
   0 -10   7  31820. 2308.97   1
   0  10  -7  30884. 2669.10   1
   0  10  -7  31496. 2250.52   1
   0 -10   6 1183.02 1948.85   1
   0 -10   6 -142.55 1801.32   1
   0  10  -6 1178.50 1645.09   1
   0  10  -6  -31.04 1937.37   1
   0 -10   5 4714.68 1972.51   1
   0 -10   5 2248.78 1544.54   1
   0  10  -5 -260.86 1585.59   1
   0  10  -5 -570.28 1877.52   1
   0 -10   4  510.44 1795.06   1
   0 -10   4 -113.81 1882.74   1
   0  10  -4  252.16 1537.92   1
   0  10  -4 1238.69 1975.64   1
   0 -10   3  26754. 2278.70   1
   0 -10   3  25261. 2239.73   1
   0  10  -3  22644. 1888.66   1
   0  10  -3  26580. 2370.91   1
   0 -10   2 1242.17 1791.58   1
   0 -10   2  624.91 1855.25   1
   0  10  -2  966.60 1560.54   1
   0  10  -2 3374.74 1995.82   1
   0 -10   1  28403. 2363.60   1
   0 -10   1  30216. 2332.29   1
   0  10  -1  28420. 2114.12   1
   0  10  -1  27122. 2394.22   1
   0 -10   0  46590. 2847.25   1
   0 -10   0  46486. 2789.84   1
   0  10   0  42484. 2499.65   1
   0  10   0  44572. 2857.69   1
   0 -10  -1 -1667.7 1874.04   1
   0 -10  -1 -1470.1 1919.27   1
   0  10   1 -2577.2 2122.13   1
   0  10   1 1109.25 1633.61   1
   0 -10  -2 4088.37 2008.35   1
   0 -10  -2  942.94 1894.22   1
   0  10   2 3869.17 1766.53   1
   0  10   2 -1521.2 2140.92   1
   0 -10  -3 7529.57 2001.74   1
   0 -10  -3 8803.05 2123.17   1
   0  10   3 4864.30 1765.83   1
   0  10   3 9919.96 2389.35   1
   0 -10  -4 3670.84 2001.04   1
   0 -10  -4 3733.47 2176.06   1
   0  10   4 3067.85 1851.08   1
   0  10   4 3286.36 2345.86   1
   0 -10  -5 -4641.6 2108.21   1
   0 -10  -5  231.18 1929.36   1
   0  10   5 -2274.5 1788.10   1
   0  10   5 -2089.4 2298.88   1
   0 -10  -6  12634. 2366.39   1
   0 -10  -6  10191. 2067.50   1
   0  10   6 8556.01 1977.73   1
   0  10   6 9585.93 2403.62   1
   0 -10  -7 9540.70 2200.42   1
   0 -10  -7  14395. 2488.17   1
   0  10   7  17975. 2205.63   1
   0  10   7  12992. 2610.99   1
   0 -10  -8 3945.72 1934.58   1
   0 -10  -8 5334.02 2399.09   1
   0  10   8 5368.82 1946.41   1
   0  10   8 7626.99 2218.16   1
   0 -10  -9  78845. 4057.06   1
   0 -10  -9  77975. 3886.57   1
   0  10   9  66806. 3837.85   1
   0  10   9  74704. 3820.46   1
   0 -10 -10 1238.69 2425.54   1
   0 -10 -10 7581.76 2541.40   1
   0  10  10 3883.09 2107.51   1
   0  10  10 4384.13 2634.65   1
   0 -10 -11  14958. 2530.27   1
   0 -10 -11  10957. 1987.47   1
   0  10  11  12314. 2062.98   1
   0  10  11  20049. 2774.53   1
   0 -10 -12 -2397.4 2764.79   1
   0 -10 -12 3179.54 2549.41   1
   0  10  12 3368.82 2174.67   1
   0  10  12  653.79 2738.69   1
   0 -10 -13  18198. 2809.67   1
   0 -10 -13  24770. 3031.31   1
   0  10  13  19836. 2468.68   1
   0  10  13  21388. 3117.60   1
   0 -10 -14 7682.67 2443.63   1
   0 -10 -14 7484.34 2195.20   1
   0  10  14 5194.85 2303.76   1
   0  10  14 8810.01 2386.91   1
   0 -10 -15  16054. 2967.64   1
   0 -10 -15  16197. 2949.20   1
   0  10  15  13584. 2662.84   1
   0  10  15  12227. 3274.18   1
   0 -10 -16 -3500.3 2965.90   1
   0 -10 -16 1400.83 2764.44   1
   0  10  16 1069.59 2478.43   1
   0  10  16 3242.52 3147.87   1
   0 -10 -17 3184.06 2902.57   1
   0 -10 -17 4735.56 2950.24   1
   0  10  17 -1238.7 3428.67   1
   0  10  17 4498.95 2533.40   1
   0 -10 -18  19739. 3064.72   1
   0 -10 -18  20922. 3254.69   1
   0  10  18  20598. 2854.90   1
   0  10  18  20849. 3580.37   1
   0 -10 -19 4192.76 3023.66   1
   0 -10 -19 -317.36 2921.71   1
   0  10  19 3872.65 2850.38   1
   0  10  19 -2518.1 3143.70   1
   0 -10 -20 7324.28 2888.65   1
   0 -10 -20 -2533.4 2946.07   1
   0  10  20 -2523.3 3046.62   1
   0  10  20 2878.91 2954.42   1
   0 -11  22 6875.43 2814.89   1
   0 -11  22 5236.60 2653.09   1
   0  11 -22 -3688.2 2692.41   1
   0  11 -22  532.36 3104.03   1
   0 -11  21 4025.74 3035.84   1
   0 -11  21 3267.57 2626.30   1
   0  11 -21 -562.98 2507.65   1
   0  11 -21 7160.74 3227.21   1
   0 -11  20 2439.80 2808.28   1
   0 -11  20 6256.08 2617.60   1
   0  11 -20  663.53 2558.80   1
   0  11 -20 6628.39 3147.87   1
   0 -11  19 6882.39 2982.25   1
   0 -11  19 4199.72 2651.35   1
   0  11 -19 -1126.3 2591.51   1
   0  11 -19 1802.36 2838.20   1
   0 -11  18  10567. 2714.68   1
   0 -11  18  14645. 2786.71   1
   0  11 -18 8048.01 2976.34   1
   0  11 -18  10177. 2487.82   1
   0 -11  17  -91.61 2264.09   1
   0 -11  17 -975.29 2448.50   1
   0  11 -17   81.77 1684.41   1
   0  11 -17 1081.77 2899.79   1
   0 -11  16  15247. 2398.40   1
   0 -11  16  17126. 2102.29   1
   0  11 -16  14502. 2316.98   1
   0  11 -16  10957. 2835.07   1
   0 -11  15 4457.20 2497.21   1
   0 -11  15 4025.74 2148.22   1
   0  11 -15  580.72 2388.31   1
   0  11 -15 4029.22 2958.24   1
   0 -11  14 5407.09 2188.59   1
   0 -11  14 3576.89 2303.06   1
   0  11 -14 5316.63 2074.46   1
   0  11 -14 6844.11 2679.89   1
   0 -11  13  12519. 2394.57   1
   0 -11  13  18493. 2342.38   1
   0  11 -13  13333. 2215.38   1
   0  11 -13  13125. 2616.56   1
   0 -11  12  41823. 2818.37   1
   0 -11  12  41928. 3052.54   1
   0  11 -12  43076. 2708.77   1
   0  11 -12  50070. 3344.46   1
   0 -11  11  773.49 1907.10   1
   0 -11  11  994.43 2170.84   1
   0  11 -11  354.56 1972.16   1
   0  11 -11 6496.17 2377.17   1
   0 -11  10  47704. 3230.69   1
   0 -11  10  49722. 2757.48   1
   0  11 -10  49165. 3321.85   1
   0  11 -10  43354. 2635.35   1
   0 -11   9 -2306.2 1858.04   1
   0 -11   9   39.35 1942.24   1
   0  11  -9 1446.07 2098.81   1
   0  11  -9 1948.15 2229.99   1
   0 -11   8  14958. 2077.59   1
   0 -11   8  14137. 1895.96   1
   0  11  -8  13977. 2041.06   1
   0  11  -8  14861. 2357.34   1
   0 -11   7 2136.39 1247.04   1
   0 -11   7 -2825.7 1860.82   1
   0  11  -7  543.84 1846.21   1
   0  11  -7 3740.43 2004.17   1
   0 -11   6 4067.50 1898.75   1
   0 -11   6 5142.65 1875.43   1
   0  11  -6 7150.31 1747.39   1
   0  11  -6 8027.13 2000.00   1
   0 -11   5   73.80 1905.36   1
   0 -11   5  748.78 1795.75   1
   0  11  -5  718.51 1653.10   1
   0  11  -5 -1257.5 1908.14   1
   0 -11   4 1476.34 1747.04   1
   0 -11   4 -3194.8 1681.63   1
   0  11  -4 4429.36 1688.93   1
   0  11  -4 2423.45 1799.93   1
   0 -11   3  43772. 2676.75   1
   0 -11   3  42867. 2640.92   1
   0  11  -3  43946. 2541.75   1
   0  11  -3  43319. 2645.79   1
   0 -11   2 5417.53 1823.59   1
   0 -11   2 2413.01 1862.91   1
   0  11  -2 5010.43 1902.92   1
   0  11  -2 5935.97 1756.78   1
   0 -11   1 1658.66 1730.69   1
   0 -11   1 9046.62 1929.36   1
   0  11  -1 7129.43 1829.50   1
   0  11  -1 4899.09 1851.42   1
   0 -11   0  779.75 1823.94   1
   0 -11   0 -625.26 1889.70   1
   0  11   0 -1228.3 1837.51   1
   0  11   0 -910.23 1810.02   1
   0 -11  -1 -2443.6 1589.42   1
   0  11   1 -2672.6 1807.93   1
   0  11   1 1727.90 2003.83   1
   0 -11  -2 6892.83 2058.11   1
   0 -11  -2 2211.55 1759.91   1
   0  11   2 4060.54 1939.80   1
   0  11   2 1192.07 2133.26   1
   0 -11  -3  70390. 3695.19   1
   0 -11  -3  70598. 3583.85   1
   0  11   3  69415. 3521.22   1
   0  11   3  76479. 4001.39   1
   0 -11  -4  40223. 2678.15   1
   0 -11  -4  35317. 2723.73   1
   0  11   4  40536. 2709.81   1
   0  11   4  37509. 2823.59   1
   0 -11  -5  18452. 2017.40   1
   0 -11  -5  19008. 2537.92   1
   0  11   5  19168. 2280.10   1
   0  11   5  14012. 2348.99   1
   0 -11  -6 3085.24 2442.93   1
   0 -11  -6  529.92 1906.05   1
   0  11   6 1625.26 2371.26   1
   0  11   6 6325.67 2101.60   1
   0 -11  -7 2528.53 2281.49   1
   0 -11  -7  857.34 2160.05   1
   0  11   7 4812.10 2045.93   1
   0  11   7 4773.83 2514.96   1
   0 -11  -8  12425. 2400.83   1
   0 -11  -8  17011. 1915.10   1
   0  11   8  12825. 2262.35   1
   0  11   8  12808. 2396.31   1
   0 -11  -9 4613.77 2469.73   1
   0 -11  -9 5017.39 2684.41   1
   0  11   9 5695.89 2255.04   1
   0  11   9 6694.50 2784.97   1
   0 -11 -10  22610. 2905.36   1
   0 -11 -10  21079. 2498.26   1
   0  11  10  14927. 2550.45   1
   0  11  10  18184. 2701.46   1
   0 -11 -11 -741.82 2644.05   1
   0 -11 -11 -932.85 2576.55   1
   0  11  11 -410.93 2383.09   1
   0  11  11 -3112.7 2737.30   1
   0 -11 -12  447.11 2635.70   1
   0 -11 -12 4070.98 2737.99   1
   0  11  12  927.97 2307.24   1
   0  11  12   92.52 2665.62   1
   0 -11 -13 2637.09 2590.12   1
   0 -11 -13 5699.37 2819.41   1
   0  11  13 4582.46 2460.68   1
   0  11  13 6437.02 2499.65   1
   0 -11 -14 2671.19 2870.91   1
   0 -11 -14 9610.29 3263.04   1
   0  11  14 -518.44 3056.36   1
   0  11  14 -3851.8 3060.19   1
   0 -11 -15 -2054.6 2807.93   1
   0 -11 -15 1172.58 2973.21   1
   0  11  15 -3409.2 2451.98   1
   0  11  15 -2581.4 3138.48   1
   0 -11 -16  12383. 3028.88   1
   0 -11 -16  11621. 2899.79   1
   0  11  16 8135.00 2500.69   1
   0  11  16 5121.78 3005.91   1
   0 -11 -17 2449.20 2425.54   1
   0 -11 -17 5052.19 3033.75   1
   0  11  17 -341.34 2394.57   1
   0  11  17 1021.57 2672.58   1
   0 -11 -18 -1162.5 2253.65   1
   0 -11 -18   23.68 2848.64   1
   0  11  18   89.94 2446.76   1
   0  11  18 -5967.3 2922.75   1
   0 -11 -19 -866.39 1952.68   1
   0  11  19 1265.13 2325.68   1
   0 -12  21 -2620.0 2652.75   1
   0 -12  21 -433.89 2775.22   1
   0  12 -21 -2445.0 2780.44   1
   0  12 -21 -1497.2 3195.54   1
   0 -12  20  35839. 3342.03   1
   0 -12  20  32345. 3344.46   1
   0  12 -20  38622. 3213.98   1
   0  12 -20  36291. 3677.80   1
   0 -12  19 1011.83 2744.95   1
   0 -12  19 -2719.6 2655.18   1
   0  12 -19 2009.39 2406.05   1
   0  12 -19 2626.30 3159.70   1
   0 -12  18 1754.70 2525.75   1
   0 -12  18 3667.36 2774.18   1
   0  12 -18 -305.18 2945.37   1
   0  12 -18  730.34 2158.31   1
   0 -12  17  35038. 3190.67   1
   0 -12  17  31120. 2805.15   1
   0  12 -17  39074. 2628.74   1
   0  12 -17  34864. 3427.62   1
   0 -12  16 2773.83 2602.29   1
   0 -12  16 2382.74 1824.63   1
   0  12 -16  210.09 2241.82   1
   0  12 -16 4739.04 2818.02   1
   0 -12  15 2570.98 2474.60   1
   0 -12  15  922.75 2362.56   1
   0  12 -15 4676.40 2416.14   1
   0  12 -15 7004.17 2837.16   1
   0 -12  14 -1463.1 2256.09   1
   0 -12  14 2416.14 2456.85   1
   0  12 -14 -135.42 2074.81   1
   0  12 -14 4874.73 2798.54   1
   0 -12  13 8295.05 2384.48   1
   0 -12  13  10205. 1723.03   1
   0  12 -13 6965.89 2011.13   1
   0  12 -13  12547. 3139.18   1
   0 -12  12 5285.31 2236.60   1
   0 -12  12  10849. 2436.67   1
   0  12 -12 8952.67 2250.87   1
   0  12 -12  11691. 2752.26   1
   0 -12  11 6353.51 2061.93   1
   0 -12  11 3517.74 2099.51   1
   0  12 -11 5313.15 1869.87   1
   0  12 -11 6743.21 2607.86   1
   0 -12  10 4157.96 2291.23   1
   0 -12  10 4752.95 2013.92   1
   0  12 -10 9975.63 2534.79   1
   0  12 -10 3775.22 2033.40   1
   0 -12   9 3096.03 2193.80   1
   0 -12   9 6398.74 1956.50   1
   0  12  -9 2515.66 1853.51   1
   0  12  -9 3754.35 2385.87   1
   0 -12   8  488.52 1914.40   1
   0 -12   8  568.89 1773.48   1
   0  12  -8 1777.31 1957.55   1
   0  12  -8 -1570.3 2049.06   1
   0 -12   7  28299. 2172.93   1
   0 -12   7  26378. 2385.18   1
   0  12  -7  34969. 2475.64   1
   0  12  -7  33876. 2776.96   1
   0 -12   6  20000. 2296.10   1
   0 -12   6  14426. 2105.08   1
   0  12  -6  20164. 2096.03   1
   0  12  -6  16096. 2156.92   1
   0 -12   5  52923. 3035.49   1
   0 -12   5  50870. 2910.57   1
   0  12  -5  49652. 2702.15   1
   0  12  -5  53897. 3040.71   1
   0 -12   4 3552.54 1763.39   1
   0 -12   4 4704.24 1903.27   1
   0  12  -4  294.26 1700.07   1
   0  12  -4 -617.95 1815.59   1
   0 -12   3 3709.11 1836.81   1
   0 -12   3 2724.42 1905.36   1
   0  12  -3 2093.94 1794.36   1
   0  12  -3 2998.61 1837.85   1
   0 -12   2 6558.80 2099.51   1
   0 -12   2 8709.11 1997.91   1
   0  12  -2 8890.04 1998.26   1
   0  12  -2 7609.60 1982.60   1
   0 -12   1  15630. 2048.71   1
   0 -12   1  16315. 2107.51   1
   0  12  -1  19367. 2242.86   1
   0  12  -1  12397. 2223.38   1
   0 -12   0 2350.38 1828.11   1
   0 -12   0 3535.14 1866.39   1
   0  12   0  -22.32 1846.21   1
   0  12   0 -2315.9 2106.12   1
   0 -12  -1  32791. 2473.21   1
   0 -12  -1  36047. 2669.45   1
   0  12   1  36395. 2637.44   1
   0  12   1  35943. 2744.60   1
   0 -12  -2 3050.45 1985.38   1
   0 -12  -2 2256.09 1700.07   1
   0  12   2  185.35 1922.75   1
   0  12   2 1028.18 2226.16   1
   0 -12  -3 4095.33 2146.14   1
   0 -12  -3 3521.22 2062.63   1
   0  12   3 6242.17 2122.48   1
   0  12   3 4954.76 2421.71   1
   0 -12  -4  35143. 2447.11   1
   0 -12  -4  35456. 2768.61   1
   0  12   4  33984. 2719.20   1
   0  12   4  34287. 2769.66   1
   0 -12  -5  288.10 2062.63   1
   0 -12  -5 -2841.0 2184.41   1
   0  12   5 4321.50 2066.80   1
   0  12   5 4836.46 2624.21   1
   0 -12  -6 9700.76 2396.66   1
   0 -12  -6 8956.15 2099.86   1
   0  12   6  11548. 2332.64   1
   0  12   6  13963. 2277.31   1
   0 -12  -7 5347.94 2556.71   1
   0 -12  -7 8218.50 2290.53   1
   0  12   7 2075.85 2319.76   1
   0  12   7 7456.50 2800.62   1
   0 -12  -8 3469.03 2397.35   1
   0 -12  -8 1691.37 2149.96   1
   0  12   8 4491.99 2302.02   1
   0  12   8 -1377.9 2255.74   1
   0 -12  -9  -31.63 2403.27   1
   0 -12  -9 -1004.9 2390.05   1
   0  12   9 -168.75 2242.17   1
   0  12   9 -4168.4 2683.37   1
   0 -12 -10  -10.05 2435.28   1
   0 -12 -10 1775.92 1917.88   1
   0  12  10 -964.16 2248.78   1
   0  12  10 1893.53 2411.62   1
   0 -12 -11 5758.52 2704.59   1
   0 -12 -11 7042.44 2782.18   1
   0  12  11 8528.18 2555.32   1
   0  12  11 6207.37 2782.18   1
   0 -12 -12 4151.01 3115.52   1
   0 -12 -12 7599.16 2908.49   1
   0  12  12  873.35 2603.69   1
   0  12  12 2194.15 2894.57   1
   0 -12 -13 2883.44 2169.80   1
   0 -12 -13 2438.41 2889.00   1
   0  12  13 -2731.4 2616.91   1
   0  12  13 7192.06 2763.05   1
   0 -12 -14 -2757.1 2860.47   1
   0 -12 -14 -3060.2 2145.09   1
   0  12  14 3362.56 2248.08   1
   0  12  14 3360.82 2582.11   1
   0 -12 -15 -360.47 3135.70   1
   0 -12 -15 1584.20 3073.76   1
   0  12  15 4826.02 2882.74   1
   0  12  15  505.57 2932.50   1
   0 -12 -16 3090.46 2962.42   1
   0 -12 -16 1258.87 3373.34   1
   0  12  16 -110.09 2939.45   1
   0  12  16  735.21 3217.46   1
   0 -12 -17  878.22 3252.95   1
   0 -12 -17 1975.64 2804.10   1
   0  12  17 6200.41 2901.53   1
   0  12  17 8075.84 4161.44   1
   0 -13  19 -4370.2 2806.19   1
   0 -13  19 -572.37 2721.29   1
   0  13 -19  226.65 2519.48   1
   0  13 -19 7087.68 3429.36   1
   0 -13  18 -1673.3 3142.31   1
   0 -13  18 -1729.3 2730.69   1
   0  13 -18 -2028.9 2489.56   1
   0  13 -18 -1026.8 3115.17   1
   0 -13  17 -4060.5 2686.50   1
   0 -13  17 2172.58 2850.73   1
   0  13 -17 -2067.2 2382.04   1
   0  13 -17 1641.96 3355.25   1
   0 -13  16 -2822.5 2537.92   1
   0 -13  16 1102.64 2581.07   1
   0  13 -16 -1755.7 2203.89   1
   0  13 -16 -1082.5 2858.03   1
   0 -13  15  -90.47 2578.63   1
   0 -13  15 4203.20 1877.87   1
   0  13 -15  804.11 2920.67   1
   0  13 -15 4384.13 2338.20   1
   0 -13  14 3723.03 2433.89   1
   0 -13  14 2194.85 1965.55   1
   0  13 -14 2905.70 2282.88   1
   0  13 -14 7522.61 2747.74   1
   0 -13  13  18072. 2591.86   1
   0 -13  13  23873. 2627.69   1
   0  13 -13  20313. 2514.96   1
   0  13 -13  21834. 3116.91   1
   0 -13  12 -2327.1 2180.93   1
   0 -13  12 1728.25 2242.52   1
   0  13 -12 -566.11 1862.91   1
   0  13 -12 4770.35 2745.65   1
   0 -13  11  10644. 2203.55   1
   0 -13  11 7303.40 1668.75   1
   0  13 -11 6524.00 1952.33   1
   0  13 -11 6990.25 2594.99   1
   0 -13  10 4046.62 2150.31   1
   0 -13  10 1576.20 2117.26   1
   0  13 -10 3166.32 2124.91   1
   0  13 -10 2037.58 2497.21   1
   0 -13   9 -1909.5 2028.88   1
   0  13  -9 2673.28 2079.33   1
   0  13  -9 -431.11 2288.45   1
   0 -13   8 6871.95 1820.11   1
   0 -13   8 9015.30 2125.26   1
   0  13  -8  11768. 2144.40   1
   0  13  -8  13368. 2696.24   1
   0 -13   7 3344.12 2223.03   1
   0 -13   7 2330.90 1917.53   1
   0  13  -7 4617.25 2485.04   1
   0  13  -7 4857.34 2112.38   1
   0 -13   6  21983. 2330.55   1
   0 -13   6  21601. 2206.68   1
   0  13  -6  20894. 2136.05   1
   0  13  -6  22672. 2544.19   1
   0 -13   5 1436.32 2025.05   1
   0 -13   5 -1770.4 1877.52   1
   0  13  -5 -1680.2 1790.53   1
   0  13  -5 4248.43 2163.53   1
   0 -13   4  18375. 2290.53   1
   0 -13   4  12154. 2474.25   1
   0  13  -4  11674. 2048.36   1
   0  13  -4  11169. 2136.74   1
   0 -13   3  11910. 2247.74   1
   0 -13   3 8549.05 2103.34   1
   0  13  -3  12380. 2014.96   1
   0  13  -3  11315. 2119.00   1
   0 -13   2 2722.34 2005.91   1
   0 -13   2 1125.96 1988.17   1
   0  13  -2  945.72 1789.84   1
   0  13  -2  492.34 2067.15   1
   0 -13   1 1433.54 1782.18   1
   0 -13   1   89.98 1961.72   1
   0  13  -1  285.77 1954.42   1
   0  13  -1  290.40 2067.85   1
   0 -13   0 5361.86 2047.32   1
   0 -13   0 1304.45 1977.38   1
   0  13   0 -1309.0 1901.18   1
   0  13   0 2183.71 2227.21   1
   0 -13  -1 2190.67 2038.97   1
   0 -13  -1 -574.46 1871.61   1
   0  13   1 -1719.2 2266.53   1
   0  13   1 -2734.2 1880.30   1
   0 -13  -2  50174. 3084.90   1
   0 -13  -2  43806. 2934.24   1
   0  13   2  51635. 3029.22   1
   0  13   2  49408. 3283.92   1
   0 -13  -3 8183.71 2238.34   1
   0 -13  -3 8590.81 2205.98   1
   0  13   3  10438. 2164.92   1
   0  13   3  10578. 2784.62   1
   0 -13  -4 -1333.0 1823.24   1
   0 -13  -4 1702.50 2143.00   1
   0  13   4 -1191.7 2116.21   1
   0  13   4 -936.67 2385.52   1
   0 -13  -5 7988.86 2482.25   1
   0 -13  -5 8827.41 2218.16   1
   0  13   5 8228.94 2241.82   1
   0  13   5  12223. 2883.44   1
   0 -13  -6 4018.79 2372.65   1
   0 -13  -6 -409.19 1930.06   1
   0  13   6 6572.71 2433.89   1
   0  13   6  342.00 2521.57   1
   0 -13  -7  34102. 2877.17   1
   0 -13  -7  29238. 2835.42   1
   0  13   7  34172. 2791.23   1
   0  13   7  26058. 2869.52   1
   0 -13  -8 7115.51 2410.58   1
   0 -13  -8 4231.03 2426.23   1
   0  13   8 2314.89 2239.04   1
   0  13   8 5974.25 2712.94   1
   0 -13  -9 4224.07 2687.54   1
   0 -13  -9 2232.08 1861.52   1
   0  13   9 1968.68 2569.24   1
   0  13   9 3377.87 2585.24   1
   0 -13 -10 4293.66 2831.59   1
   0 -13 -10 1399.09 2523.66   1
   0  13  10 2553.58 2494.08   1
   0  13  10 -1997.6 2509.04   1
   0 -13 -11 4335.42 2706.68   1
   0 -13 -11 4157.96 2705.98   1
   0  13  11 6130.82 2533.40   1
   0  13  11 9095.33 3013.57   1
   0 -13 -12 7620.03 3100.55   1
   0 -13 -12 -1184.8 2662.49   1
   0  13  12 -3174.0 2509.39   1
   0  13  12 6475.29 3076.20   1
   0 -13 -13 -1950.2 3012.18   1
   0 -13 -13 2743.56 3081.76   1
   0  13  13  674.67 2695.89   1
   0  13  13 -650.31 2659.36   1
   0 -13 -14 5414.05 2917.88   1
   0 -13 -14 3660.40 2444.33   1
   0  13  14 5132.21 2739.73   1
   0  13  14 6235.21 2247.74   1
   0 -13 -15 2291.58 2378.91   1
   0 -13 -15 -3073.4 2823.24   1
   0  13  15 -3156.2 2953.37   1
   0  13  15 -178.46 2302.71   1
   0 -14  17 7661.79 1959.29   1
   0  14 -17  12196. 2439.11   1
   0  14 -17 3306.89 3681.28   1
   0 -14  16 3775.22 2747.74   1
   0 -14  16 2970.42 2288.79   1
   0  14 -16  632.22 3103.34   1
   0  14 -16  259.26 2405.70   1
   0 -14  15  16176. 2945.37   1
   0 -14  15  19085. 2707.72   1
   0  14 -15  20564. 2729.99   1
   0  14 -15  12432. 2958.24   1
   0 -14  14 -3486.4 2607.17   1
   0 -14  14 1124.56 2344.47   1
   0  14 -14 1853.86 2278.70   1
   0  14 -14 -3475.6 2869.17   1
   0 -14  13 3086.64 2336.11   1
   0 -14  13 8629.08 2512.87   1
   0  14 -13 -370.91 2276.62   1
   0  14 -13 4665.97 2775.92   1
   0 -14  12  914.75 2278.36   1
   0 -14  12 1479.12 2090.12   1
   0  14 -12 -845.51 2107.51   1
   0  14 -12 3021.57 2542.10   1
   0 -14  11  474.25 2218.86   1
   0 -14  11 3233.47 1593.60   1
   0  14 -11 2358.04 2057.41   1
   0  14 -11 3688.24 2723.03   1
   0 -14  10 -949.89 2014.96   1
   0 -14  10 -956.51 2220.25   1
   0  14 -10 2651.70 2263.39   1
   0  14 -10 4464.16 2437.37   1
   0 -14   9  221.12 2098.12   1
   0 -14   9 1633.26 2152.05   1
   0  14  -9 1822.20 2560.54   1
   0  14  -9 2080.72 2379.26   1
   0 -14   8 3217.46 2139.18   1
   0 -14   8 3942.24 1978.08   1
   0  14  -8 3674.32 2636.04   1
   0  14  -8 3796.10 2213.29   1
   0 -14   7 2290.88 1808.28   1
   0 -14   7  234.45 1736.60   1
   0  14  -7 4986.08 2020.18   1
   0  14  -7 2118.65 2275.57   1
   0 -14   6  10337. 2144.05   1
   0 -14   6 6983.29 2037.92   1
   0  14  -6 7355.59 2032.70   1
   0  14  -6  11301. 2460.33   1
   0 -14   5  19429. 2321.15   1
   0 -14   5  14617. 2440.85   1
   0  14  -5  18055. 2244.26   1
   0  14  -5  17477. 2626.65   1
   0 -14   4  15056. 2470.77   1
   0 -14   4  11583. 2181.97   1
   0  14  -4  14972. 2219.20   1
   0  14  -4  13904. 2456.85   1
   0 -14   3 2708.42 2075.50   1
   0 -14   3 2169.80 1982.95   1
   0  14  -3 4213.64 2036.88   1
   0  14  -3 6649.26 2410.23   1
   0 -14   2  792.27 1953.37   1
   0 -14   2 5521.92 2076.20   1
   0  14  -2 2888.31 1898.75   1
   0  14  -2 -215.34 2447.46   1
   0 -14   1 3775.22 2025.05   1
   0 -14   1 -871.26 2015.31   1
   0  14  -1 -2366.4 1818.02   1
   0  14  -1 3473.90 2597.42   1
   0 -14   0 3879.61 2132.57   1
   0 -14   0 -229.64 1927.97   1
   0  14   0 -3806.5 2643.00   1
   0  14   0 5250.52 1979.82   1
   0 -14  -1 1875.78 2169.10   1
   0 -14  -1 -3493.4 2173.62   1
   0  14   1 -397.36 2074.46   1
   0  14   1 3432.15 2789.84   1
   0 -14  -2 -170.25 2171.19   1
   0 -14  -2 -408.14 2143.00   1
   0  14   2 -199.06 2100.21   1
   0  14   2 -3404.3 2800.62   1
   0 -14  -3 3827.41 2074.46   1
   0 -14  -3 6242.17 2304.10   1
   0  14   3 3841.33 2226.51   1
   0  14   3 7940.15 2855.95   1
   0 -14  -4 -289.60 2324.98   1
   0 -14  -4  679.19 2000.69   1
   0  14   4 -2130.8 2147.88   1
   0  14   4 1012.87 2433.89   1
   0 -14  -5 -1725.1 2235.21   1
   0 -14  -5 1128.04 2090.46   1
   0  14   5 2622.13 2331.94   1
   0  14   5 -107.52 2635.70   1
   0 -14  -6 1738.69 2147.88   1
   0 -14  -6 5365.34 2399.44   1
   0  14   6 6927.62 2586.64   1
   0  14   6 5626.30 2726.16   1
   0 -14  -7 -382.39 1615.52   1
   0 -14  -7 4784.27 2529.57   1
   0  14   7  502.78 2411.27   1
   0  14   7 1090.47 2358.73   1
   0 -14  -8 7661.79 2541.06   1
   0 -14  -8 6430.06 2307.24   1
   0  14   8  10268. 2527.49   1
   0  14   8 2821.50 2498.95   1
   0 -14  -9 -2698.7 2515.66   1
   0 -14  -9 -2410.6 2656.23   1
   0  14   9 -3441.9 2348.29   1
   0  14   9 2114.47 2964.85   1
   0 -14 -10 -1546.3 2532.36   1
   0 -14 -10 1413.71 2920.32   1
   0  14  10 1470.08 2573.76   1
   0  14  10 -3174.7 2895.61   1
   0 -14 -11 2735.91 2707.03   1
   0 -14 -11 5894.22 2954.76   1
   0  14  11 -1510.8 2711.55   1
   0  14  11 -938.41 2849.68   1
   0 -14 -12 3050.45 2887.26   1
   0 -14 -12  -81.25 2347.60   1
   0  14  12 1541.06 2863.95   1
   0  14  12 -1833.0 2727.21   1
   0 -14 -13 -1435.3 3133.61   1
   0 -14 -13 1184.76 2455.11   1
   0  14  13 6510.08 3049.75   1
   0  14  13 3024.35 2216.07   1
   0 -15  15 -4178.8 2713.98   1
   0 -15  15 6878.91 2854.56   1
   0  15 -15 4899.09 2656.57   1
   0  15 -15 1519.14 3053.93   1
   0 -15  14 2857.34 2391.79   1
   0 -15  14 -1973.2 2513.57   1
   0  15 -14 1124.22 2254.35   1
   0  15 -14 8385.52 2770.00   1
   0 -15  13 2347.60 2639.52   1
   0 -15  13 2540.01 2381.70   1
   0  15 -13 5835.07 2691.02   1
   0  15 -13  648.22 2155.53   1
   0 -15  12 -591.16 2573.76   1
   0 -15  12 2088.38 2391.44   1
   0  15 -12 5462.76 2123.52   1
   0  15 -12 1962.07 2588.72   1
   0 -15  11 1363.26 2458.59   1
   0 -15  11 -800.63 2282.88   1
   0  15 -11 -3172.2 1860.12   1
   0  15 -11 6569.24 2803.76   1
   0 -15  10  16608. 2141.96   1
   0 -15  10  15160. 2450.24   1
   0  15 -10  16406. 2217.12   1
   0  15 -10  14715. 2647.53   1
   0 -15   9 2032.36 2093.60   1
   0 -15   9 4592.90 1898.75   1
   0  15  -9 5880.30 2090.81   1
   0  15  -9 -2394.9 2501.39   1
   0 -15   8 4196.24 2012.87   1
   0 -15   8 2147.53 1810.02   1
   0  15  -8 8782.18 2105.43   1
   0  15  -8   56.02 2312.11   1
   0 -15   7  12147. 1945.02   1
   0 -15   7  10633. 2214.68   1
   0  15  -7  11093. 2421.01   1
   0  15  -7 9683.36 2425.89   1
   0 -15   6 1870.21 1500.00   1
   0 -15   6 4561.58 2025.75   1
   0  15  -6 4599.86 2211.55   1
   0  15  -6 2112.38 2155.53   1
   0 -15   5 -2817.7 2213.64   1
   0 -15   5 1916.49 1979.82   1
   0  15  -5  772.09 2247.74   1
   0  15  -5 -1354.6 2081.07   1
   0 -15   4  16910. 2503.13   1
   0 -15   4  15859. 2188.59   1
   0  15  -4  16138. 2338.20   1
   0  15  -4  12606. 2404.66   1
   0 -15   3 2133.61 2277.66   1
   0 -15   3 1114.82 1875.09   1
   0  15  -3 -1220.2 2094.64   1
   0  15  -3 3879.61 2320.46   1
   0 -15   2 4585.94 1876.48   1
   0 -15   2 -2972.9 2077.94   1
   0  15  -2  909.53 2169.80   1
   0  15  -2 -1619.0 2384.83   1
   0 -15   1 5323.59 2247.74   1
   0 -15   1 5751.56 1795.06   1
   0  15  -1 7661.79 2236.60   1
   0  15  -1 9091.85 2475.64   1
   0 -15   0  765.83 2100.55   1
   0 -15   0  344.08 1784.62   1
   0  15   0 1392.83 2089.42   1
   0  15   0  -30.88 2410.58   1
   0 -15  -1 2372.30 1915.80   1
   0 -15  -1 3128.04 2174.32   1
   0  15   1 2312.11 2062.28   1
   0  15   1 -2444.3 2264.44   1
   0 -15  -2 3486.43 2006.96   1
   0 -15  -2   55.95 2196.59   1
   0  15   2 2056.02 2310.71   1
   0  15   2  10536. 2634.65   1
   0 -15  -3 3910.92 2290.88   1
   0 -15  -3 6189.97 2100.21   1
   0  15   3 5257.48 2481.90   1
   0  15   3 7463.46 2282.88   1
   0 -15  -4 7536.53 2328.46   1
   0 -15  -4 5330.54 2159.36   1
   0  15   4 8917.88 2567.85   1
   0  15   4 4909.53 2686.84   1
   0 -15  -5 2260.26 2345.16   1
   0 -15  -5 -2470.8 2188.59   1
   0  15   5 3259.91 2335.07   1
   0  15   5 3719.55 2702.50   1
   0 -15  -6 1194.50 2315.93   1
   0 -15  -6 -185.94 2392.48   1
   0  15   6 -1016.0 2388.31   1
   0  15   6 -2123.5 2769.31   1
   0 -15  -7  14241. 2590.81   1
   0 -15  -7  16507. 2417.53   1
   0  15   7  15511. 2582.81   1
   0  15   7  15845. 2923.10   1
   0 -15  -8 7540.01 2724.77   1
   0 -15  -8  11367. 1986.43   1
   0  15   8 8691.71 2782.53   1
   0  15   8  10424. 2477.73   1
   0 -15  -9 3590.81 2479.12   1
   0 -15  -9 9255.38 2875.08   1
   0  15   9 8695.19 2705.98   1
   0  15   9  12098. 2830.20   1
   0 -15 -10 -854.91 2840.99   1
   0 -15 -10  774.88 2742.52   1
   0  15  10 6005.56 2921.71   1
   0  15  10 2170.84 2591.16   1
   0 -16  11  17498. 2485.04   1
   0 -16  11  13386. 2453.37   1
   0  16 -11  12310. 2744.60   1
   0  16 -11  14871. 2367.78   1
   0 -16  10 3035.49 2417.88   1
   0 -16  10 4832.98 2227.21   1
   0  16 -10 -2112.0 2212.94   1
   0  16 -10  256.68 2503.48   1
   0 -16   9  19777. 2599.86   1
   0 -16   9  22401. 2523.66   1
   0  16  -9  20525. 2474.60   1
   0  16  -9  16583. 2626.65   1
   0 -16   8 4137.09 2058.80   1
   0 -16   8 6332.63 2595.33   1
   0  16  -8 8862.20 2231.38   1
   0  16  -8 7839.24 2560.19   1
   0 -16   7 4888.65 1898.40   1
   0 -16   7 -814.89 2019.83   1
   0  16  -7 4575.50 2189.28   1
   0  16  -7 4871.25 2426.23   1
   0 -16   6 2647.18 2266.53   1
   0 -16   6 1898.40 2025.40   1
   0  16  -6 2797.49 2189.28   1
   0  16  -6 3251.91 2427.97   1
   0 -16   5  41614. 2994.78   1
   0 -16   5  33779. 2915.45   1
   0  16  -5  33295. 2497.91   1
   0  16  -5  36534. 2924.49   1
   0 -16   4 2251.91 2220.94   1
   0 -16   4 7366.03 2197.63   1
   0  16  -4 3789.14 1809.67   1
   0  16  -4 4916.49 2577.24   1
   0 -16   3 -123.76 2362.21   1
   0 -16   3 3157.97 2244.26   1
   0  16  -3  640.22 2396.66   1
   0  16  -3 1219.55 2165.62   1
   0 -16   2 7435.62 2808.28   1
   0 -16   2 4745.99 1947.46   1
   0  16  -2 7352.12 2075.85   1
   0  16  -2 9620.73 2487.12   1
   0 -16   1 2533.05 2343.07   1
   0 -16   1  376.48 2195.20   1
   0  16  -1 2256.43 2107.17   1
   0  16  -1 -2349.7 2474.25   1
   0 -16   0 2105.43 2286.36   1
   0 -16   0 1932.15 2322.54   1
   0  16   0 1998.95 2138.83   1
   0  16   0 1331.59 2569.24   1
   0 -16  -1 -1078.3 2244.60   1
   0 -16  -1 2045.58 2246.00   1
   0  16   1 -259.12 2348.29   1
   0  16   1 8768.26 2657.97   1
   0 -16  -2 -4666.0 2304.80   1
   0 -16  -2   33.35 2238.69   1
   0  16   2 -3719.6 2354.21   1
   0  16   2 -4387.6 2749.48   1
   0 -16  -3 3072.72 2236.60   1
   0 -16  -3 4307.58 2178.49   1
   0  16   3 4756.43 2232.08   1
   0  16   3 3576.89 2869.17   1
   0 -16  -4  20355. 2429.71   1
   0 -16  -4  19304. 2553.23   1
   0  16   4  12154. 2512.87   1
   0  16   4  12704. 2908.14   1
   0 -16  -5 6322.19 2372.65   1
   0 -16  -5 5532.35 2247.04   1
   0  16   5 8298.53 2917.88   1
   0  16   5 9084.89 2619.00   1
   0 -16  -6 8329.85 2485.38   1
   0 -16  -6 1542.45 2271.05   1
   0  16   6 7289.48 2842.73   1
   0  16   6 2511.13 2752.61   1
  -1  17   1 8093.24 2760.96   1
   1 -17  -1  10818. 2195.54   1
  -1  17   0 -325.68 2448.50   1
  -1  17   0 4491.99 2223.03   1
   1 -17   0 1051.50 2238.69   1
   1 -17   0 2427.62 2276.96   1
  -1  17  -1 3966.59 2940.85   1
  -1  17  -1  261.24 2107.86   1
   1 -17   1 1731.04 2411.97   1
   1 -17   1 -709.12 2173.28   1
  -1  17  -2 8347.24 2936.32   1
  -1  17  -2 5525.40 2030.27   1
   1 -17   2 9391.08 2463.46   1
   1 -17   2 6322.19 2229.64   1
  -1  17  -3 -2226.9 2661.44   1
  -1  17  -3 -2177.1 2077.94   1
   1 -17   3 -778.36 2243.21   1
   1 -17   3 2986.43 2437.37   1
  -1  17  -4  14676. 2302.02   1
  -1  17  -4  13598. 2783.92   1
   1 -17   4  16211. 2502.78   1
   1 -17   4  19154. 2672.23   1
  -1  17  -5  35943. 2770.70   1
  -1  17  -5  46277. 3304.45   1
   1 -17   5  33893. 2835.07   1
   1 -17   5  34422. 2545.93   1
  -1  17  -6 4380.65 2482.95   1
  -1  17  -6 6221.29 2224.42   1
   1 -17   6 7553.92 2405.36   1
   1 -17   6 6183.01 2044.88   1
  -1  16   7 -1733.8 2964.16   1
  -1  16   7 -109.99 2501.74   1
   1 -16  -7 4766.87 2672.23   1
   1 -16  -7  224.56 2583.85   1
  -1  16   6 5177.45 3148.92   1
  -1  16   6 2542.45 2452.33   1
   1 -16  -6 -1420.7 2474.95   1
   1 -16  -6  113.71 2627.69   1
  -1  16   5 7508.69 2289.49   1
  -1  16   5 5292.27 2994.78   1
   1 -16  -5 6697.98 2441.89   1
   1 -16  -5 4119.69 2407.79   1
  -1  16   4 1058.45 2754.35   1
  -1  16   4 5574.11 2347.60   1
   1 -16  -4 3636.04 2271.05   1
   1 -16  -4 8496.86 2503.82   1
  -1  16   3 4290.18 2695.89   1
  -1  16   3 3434.58 2347.95   1
   1 -16  -3 -2120.0 2173.62   1
   1 -16  -3 6450.93 2317.33   1
  -1  16   2 1720.60 2329.16   1
  -1  16   2 6057.75 2659.36   1
   1 -16  -2 -1124.6 2153.79   1
   1 -16  -2 -345.75 2410.58   1
  -1  16   1 4237.99 2430.41   1
  -1  16   1 3027.48 2600.55   1
   1 -16  -1 3806.54 2231.38   1
   1 -16  -1  933.89 2199.02   1
  -1  16   0 -100.03 2537.23   1
  -1  16   0  892.14 2089.77   1
   1 -16   0 4050.10 2250.87   1
   1 -16   0 1121.43 2212.94   1
  -1  16  -1 2487.12 2528.18   1
  -1  16  -1 1245.65 2101.60   1
   1 -16   1 2905.70 2258.52   1
   1 -16   1 -1298.2 2250.17   1
  -1  16  -2 1239.39 2437.72   1
  -1  16  -2 1477.73 2114.47   1
   1 -16   2 2065.06 2108.91   1
   1 -16   2 -184.34 2113.78   1
  -1  16  -3  636.39 1946.41   1
  -1  16  -3  438.07 2429.36   1
   1 -16   3 2786.01 2132.22   1
   1 -16   3 -3997.9 2264.44   1
  -1  16  -4  15999. 2573.41   1
  -1  16  -4  18866. 2448.15   1
   1 -16   4  17185. 2388.31   1
   1 -16   4  17206. 2477.38   1
  -1  16  -5 -3330.2 2392.13   1
  -1  16  -5  913.36 1759.91   1
   1 -16   5 6158.66 2147.88   1
   1 -16   5  154.70 2507.30   1
  -1  16  -6 -1091.2 2189.98   1
  -1  16  -6 3636.04 2271.05   1
   1 -16   6 -210.82 1469.38   1
   1 -16   6  456.51 2092.90   1
  -1  16  -7 4081.42 2296.45   1
  -1  16  -7 1343.77 2394.92   1
   1 -16   7 3373.00 1549.41   1
   1 -16   7 7174.66 2221.64   1
  -1  16  -8 -4116.2 2348.99   1
  -1  16  -8 2050.80 2245.65   1
   1 -16   8 -1281.5 2081.07   1
   1 -16   8 -2884.5 1504.17   1
  -1  16  -9  12081. 2589.42   1
  -1  16  -9  16903. 2171.88   1
   1 -16   9  13222. 2123.87   1
   1 -16   9  13292. 2501.39   1
  -1  16 -10 -3045.2 2551.49   1
  -1  16 -10 1918.58 2056.02   1
   1 -16  10  451.63 1952.33   1
   1 -16  10 -1708.8 2008.35   1
  -1  16 -11  957.55 1953.03   1
  -1  16 -11   67.43 2355.95   1
   1 -16  11 1075.16 1917.19   1
   1 -16  11 -561.93 2405.70   1
  -1  16 -12 4133.61 2524.35   1
  -1  16 -12 4606.81 1682.32   1
   1 -16  12 2879.61 2134.65   1
   1 -16  12 4916.49 2554.97   1
  -1  15  10  27049. 3140.22   1
  -1  15  10  18803. 2757.48   1
   1 -15 -10  27390. 2518.79   1
   1 -15 -10  21416. 3187.54   1
  -1  15   9 6116.90 2571.33   1
  -1  15   9 8256.78 2981.21   1
   1 -15  -9 9286.70 2637.78   1
   1 -15  -9 1978.77 2842.03   1
  -1  15   8 4652.05 2578.63   1
  -1  15   8 7567.84 2800.97   1
   1 -15  -8 4561.58 2379.61   1
   1 -15  -8 9192.75 2677.10   1
  -1  15   7 2740.43 2796.10   1
  -1  15   7 4846.90 2484.34   1
   1 -15  -7 1391.79 2402.92   1
   1 -15  -7 2283.92 2427.28   1
  -1  15   6 -2126.3 2827.76   1
  -1  15   6 -2728.9 2450.94   1
   1 -15  -6 -5073.1 2334.72   1
  -1  15   5 9429.36 2566.80   1
  -1  15   5 2618.65 2275.92   1
   1 -15  -5 3082.11 2132.57   1
   1 -15  -5 3935.28 2345.16   1
  -1  15   4 9342.37 2598.12   1
  -1  15   4  10240. 2401.18   1
   1 -15  -4  14040. 2088.38   1
   1 -15  -4  12456. 2459.64   1
  -1  15   3  17202. 2681.28   1
  -1  15   3  14137. 2461.72   1
   1 -15  -3  15964. 2083.85   1
   1 -15  -3  13904. 2391.44   1
  -1  15   2 -988.52 2595.33   1
  -1  15   2 -2944.0 2303.41   1
   1 -15  -2  237.16 2033.05   1
   1 -15  -2  226.13 2144.40   1
  -1  15   1 7971.46 2167.01   1
  -1  15   1 7682.67 2666.32   1
   1 -15  -1 8128.04 2192.76   1
   1 -15  -1 3729.99 2108.56   1
  -1  15   0  20442. 2469.38   1
  -1  15   0  27582. 2979.12   1
   1 -15   0  21113. 2411.27   1
   1 -15   0  21851. 2375.08   1
  -1  15  -1  10177. 2501.74   1
  -1  15  -1  10550. 2127.35   1
   1 -15   1 6102.99 2241.82   1
   1 -15   1 6423.10 2029.57   1
  -1  15  -2 5939.45 2450.94   1
  -1  15  -2 5588.03 2118.30   1
   1 -15   2 6457.89 2080.37   1
   1 -15   2 4759.91 2205.98   1
  -1  15  -3 1869.87 2333.68   1
  -1  15  -3 7696.58 2139.87   1
   1 -15   3 5748.08 2165.62   1
   1 -15   3 2847.25 2045.23   1
  -1  15  -4  636.05 1929.36   1
  -1  15  -4 1152.40 2190.32   1
   1 -15   4 1659.01 2030.97   1
   1 -15   4 -564.72 2167.01   1
  -1  15  -5 -1947.1 2189.63   1
  -1  15  -5 -601.60 1851.77   1
   1 -15   5 -1407.8 2025.05   1
   1 -15   5  176.97 1988.52   1
  -1  15  -6 1672.93 2281.14   1
  -1  15  -6 1161.10 2139.52   1
   1 -15   6 -253.76 1945.72   1
   1 -15   6  736.26 1904.66   1
  -1  15  -7  338.87 1923.45   1
  -1  15  -7 -2322.2 2395.96   1
   1 -15   7 -1654.5 1733.47   1
   1 -15   7 -677.80 1836.12   1
  -1  15  -8 7292.96 2212.25   1
  -1  15  -8 8771.74 2353.16   1
   1 -15   8 4930.41 2049.41   1
   1 -15   8 7379.95 2162.84   1
  -1  15  -9  11329. 2479.12   1
  -1  15  -9 8117.60 2515.31   1
   1 -15   9 8928.31 2147.53   1
   1 -15   9 6391.78 2274.53   1
  -1  15 -10 -5508.0 2772.09   1
  -1  15 -10 -427.28 2228.25   1
   1 -15  10 2663.18 2344.47   1
   1 -15  10 -1706.3 2117.26   1
  -1  15 -11  58838. 3684.76   1
  -1  15 -11  64405. 3476.34   1
   1 -15  11  64822. 3531.66   1
   1 -15  11  58768. 3424.49   1
  -1  15 -12 6631.87 2268.61   1
  -1  15 -12 1903.27 2635.70   1
   1 -15  12 8246.34 2055.67   1
   1 -15  12 5093.94 2498.61   1
  -1  15 -13  17276. 3002.78   1
  -1  15 -13  13479. 2210.16   1
   1 -15  13  10692. 2091.16   1
   1 -15  13  15000. 2623.52   1
  -1  15 -14  484.69 2953.37   1
  -1  15 -14 -1296.4 2004.87   1
   1 -15  14 1358.38 2037.92   1
   1 -15  14 -1161.1 2173.28   1
  -1  15 -15 3535.14 1848.64   1
  -1  15 -15 4933.89 2947.11   1
   1 -15  15 5859.42 2320.46   1
   1 -15  15    5.27 2752.61   1
  -1  14  13 6610.99 2817.33   1
  -1  14  13 6572.71 3044.88   1
   1 -14 -13  407.10 3061.93   1
   1 -14 -13 7505.21 3074.46   1
  -1  14  12 1997.21 3185.80   1
  -1  14  12 -706.68 2656.92   1
   1 -14 -12 -2581.8 2907.10   1
   1 -14 -12 1236.95 3230.34   1
  -1  14  11 3188.58 2944.33   1
  -1  14  11 -2045.9 2671.88   1
   1 -14 -11 1714.33 2918.93   1
   1 -14 -11 3684.76 2718.51   1
  -1  14  10 -980.17 2906.05   1
  -1  14  10 -3792.6 2439.45   1
   1 -14 -10 2334.03 2798.54   1
   1 -14 -10 1964.51 2812.80   1
  -1  14   9  10424. 2489.56   1
  -1  14   9  11329. 2816.98   1
   1 -14  -9  10111. 2583.16   1
   1 -14  -9  13438. 2660.05   1
  -1  14   8  16534. 2560.89   1
  -1  14   8  14165. 2518.09   1
   1 -14  -8  16399. 1953.72   1
   1 -14  -8  17491. 2648.57   1
  -1  14   7  20591. 2923.45   1
  -1  14   7  20765. 2952.68   1
   1 -14  -7  20418. 2416.49   1
   1 -14  -7  24134. 2925.54   1
  -1  14   6   13.94 2438.76   1
  -1  14   6 -1323.9 2617.60   1
   1 -14  -6 -444.68 2187.19   1
   1 -14  -6 -3247.0 2455.46   1
  -1  14   5 5508.00 2375.43   1
  -1  14   5 2101.60 2285.31   1
   1 -14  -5 -1727.2 1976.69   1
   1 -14  -5  181.11 2398.05   1
  -1  14   4  560.89 2507.30   1
  -1  14   4 1991.30 2175.71   1
   1 -14  -4   42.59 2154.14   1
   1 -14  -4 1816.63 1942.59   1
  -1  14   3 9206.67 2881.70   1
  -1  14   3 9213.63 2374.04   1
   1 -14  -3  13107. 2218.51   1
   1 -14  -3  11381. 2363.95   1
  -1  14   2  22926. 2970.42   1
  -1  14   2  22884. 2448.85   1
   1 -14  -2  20943. 2407.79   1
   1 -14  -2  26009. 2567.85   1
  -1  14   1  30612. 2517.39   1
  -1  14   1  26660. 2997.21   1
   1 -14  -1  26601. 2398.40   1
   1 -14  -1  22056. 2412.66   1
  -1  14   0 -1040.4 2421.36   1
  -1  14   0 3670.84 1952.68   1
   1 -14   0 2443.28 1651.01   1
   1 -14   0 3625.61 2073.07   1
  -1  14  -1 -6169.1 2442.93   1
  -1  14  -1 -960.68 1910.23   1
   1 -14   1  616.21 1969.73   1
   1 -14   1 2066.11 2068.54   1
  -1  14  -2  29315. 2438.41   1
  -1  14  -2  30070. 2816.98   1
   1 -14   2  33020. 2635.70   1
   1 -14   2  33097. 2613.78   1
  -1  14  -3  13236. 2120.04   1
  -1  14  -3  10494. 2257.13   1
   1 -14   3  11938. 2147.18   1
   1 -14   3  14047. 2202.85   1
  -1  14  -4 7397.35 2222.68   1
  -1  14  -4  10132. 2039.32   1
   1 -14   4  12557. 2306.19   1
   1 -14   4  10550. 2129.43   1
  -1  14  -5 -1758.5 2074.81   1
  -1  14  -5 -2291.9 1808.28   1
   1 -14   5  176.72 2029.92   1
   1 -14   5 -696.59 1910.58   1
  -1  14  -6 3319.76 2169.45   1
  -1  14  -6  967.64 1809.67   1
   1 -14   6 1251.22 1990.60   1
   1 -14   6 4509.39 2129.09   1
  -1  14  -7 1162.49 2139.52   1
  -1  14  -7 4547.66 2179.19   1
   1 -14   7 1803.76 1994.08   1
   1 -14   7 1408.14 2019.83   1
  -1  14  -8 5313.15 2282.53   1
  -1  14  -8 6419.62 2235.91   1
   1 -14   8 3931.80 1985.38   1
   1 -14   8 2598.47 2071.68   1
  -1  14  -9  16625. 2702.15   1
  -1  14  -9 8545.57 2029.23   1
   1 -14   9  12794. 1681.63   1
   1 -14   9  10738. 2106.12   1
  -1  14 -10  10292. 2073.41   1
  -1  14 -10  14026. 2447.81   1
   1 -14  10  15644. 2438.76   1
   1 -14  10  15665. 2330.90   1
  -1  14 -11 4380.65 2116.21   1
  -1  14 -11 -1221.6 2366.73   1
   1 -14  11 4540.71 2357.69   1
   1 -14  11 3077.59 2185.80   1
  -1  14 -12  468.68 2594.29   1
  -1  14 -12 3977.03 2335.42   1
   1 -14  12  -13.72 2449.55   1
   1 -14  12 4881.69 2273.14   1
  -1  14 -13  29318. 3041.40   1
  -1  14 -13  28566. 2517.05   1
   1 -14  13  26813. 2325.68   1
   1 -14  13  34482. 2791.23   1
  -1  14 -14 -787.06 2903.27   1
  -1  14 -14  488.52 1990.26   1
   1 -14  14  622.13 2087.68   1
   1 -14  14 2546.97 2282.88   1
  -1  14 -15 5048.71 2279.40   1
  -1  14 -15 2183.37 2869.87   1
   1 -14  15 1891.44 2684.06   1
   1 -14  15 2978.77 2593.60   1
  -1  14 -16  14468. 3243.91   1
  -1  14 -16  16371. 2617.60   1
   1 -14  16  17568. 2916.84   1
   1 -14  16  16684. 2904.31   1
  -1  14 -17 -3259.2 3186.15   1
  -1  14 -17 -815.24 2540.36   1
   1 -14  17 -3272.8 2508.35   1
   1 -14  17 -2924.5 2790.19   1
  -1  14 -18 4144.05 2650.66   1
  -1  14 -18 4551.14 3229.29   1
   1 -14  18 8058.45 2549.06   1
   1 -14  18 3257.83 2966.94   1
  -1  13  15 5149.61 2952.33   1
  -1  13  15 2599.51 2519.13   1
   1 -13 -15 7564.36 2432.50   1
   1 -13 -15 6548.36 3160.75   1
  -1  13  14 4265.83 2836.11   1
  -1  13  14  972.51 2812.45   1
   1 -13 -14 -1828.5 3242.52   1
   1 -13 -14  386.57 3017.74   1
  -1  13  13 3094.64 2943.28   1
  -1  13  13 5685.45 2750.87   1
   1 -13 -13  568.20 3138.48   1
   1 -13 -13 -3625.6 2798.19   1
  -1  13  12 6099.51 3112.73   1
  -1  13  12 7505.21 2481.56   1
   1 -13 -12 -357.34 3096.73   1
   1 -13 -12 2569.59 2648.92   1
  -1  13  11 -450.24 2510.78   1
  -1  13  11 -5347.9 2757.83   1
   1 -13 -11  628.74 2755.39   1
   1 -13 -11 -2723.4 2642.31   1
  -1  13  10  907.10 1969.73   1
  -1  13  10 -170.91 2544.88   1
   1 -13 -10 1047.67 2316.98   1
  -1  13   9 -569.59 2630.13   1
  -1  13   9 -1126.7 2377.17   1
   1 -13  -9    8.83 2278.01   1
   1 -13  -9 1866.39 2813.15   1
  -1  13   8 -4331.9 2262.70   1
  -1  13   8 1175.02 2555.67   1
   1 -13  -8 -1414.4 2287.75   1
   1 -13  -8 -1928.0 2518.79   1
  -1  13   7 9516.34 2363.25   1
  -1  13   7 7185.10 2395.27   1
   1 -13  -7  11674. 2156.57   1
   1 -13  -7  10696. 2519.48   1
  -1  13   6 9756.43 2668.06   1
  -1  13   6  11614. 2351.77   1
   1 -13  -6 5076.54 2370.21   1
   1 -13  -6 8622.12 2068.89   1
  -1  13   5 -2470.4 2547.32   1
  -1  13   5  123.90 2116.21   1
   1 -13  -5 1120.04 2052.89   1
   1 -13  -5 2067.15 2347.60   1
  -1  13   4 5487.12 2643.70   1
  -1  13   4 -822.55 2330.55   1
   1 -13  -4 3486.43 2035.14   1
   1 -13  -4  899.79 2237.65   1
  -1  13   3 -4067.5 1961.38   1
  -1  13   3  187.54 2465.20   1
   1 -13  -3 -3862.2 2137.09   1
   1 -13  -3 -1392.1 2101.25   1
  -1  13   2  10115. 2615.86   1
  -1  13   2  10442. 2073.76   1
   1 -13  -2 9805.14 2026.44   1
   1 -13  -2 9519.82 2223.73   1
  -1  13   1 3893.52 2307.24   1
  -1  13   1 -386.57 1871.61   1
   1 -13  -1 1099.51 1916.49   1
   1 -13  -1  481.21 2027.83   1
  -1  13   0   47.43 1888.31   1
  -1  13   0 1662.49 2136.74   1
   1 -13   0  239.98 1969.03   1
   1 -13   0 -720.95 1964.16   1
  -1  13  -1 8531.66 1999.30   1
  -1  13  -1  11343. 2279.05   1
   1 -13   1 5034.79 2002.78   1
   1 -13   1 7978.42 2025.40   1
  -1  13  -2 3963.11 2029.92   1
  -1  13  -2 3223.03 1707.72   1
   1 -13   2 -342.34 1821.50   1
   1 -13   2 -1411.3 1988.17   1
  -1  13  -3  62596. 3477.03   1
  -1  13  -3  64301. 3226.16   1
   1 -13   3  63152. 3352.12   1
   1 -13   3  60891. 3205.98   1
  -1  13  -4 3282.18 2021.57   1
  -1  13  -4 4164.92 1875.43   1
   1 -13   4 5167.01 1967.29   1
   1 -13   4 1125.61 1931.45   1
  -1  13  -5  589.77 1565.76   1
  -1  13  -5 2268.27 1966.25   1
   1 -13   5 3789.14 1863.95   1
   1 -13   5 3026.09 2096.38   1
  -1  13  -6 7143.35 2054.28   1
  -1  13  -6 4993.04 1923.10   1
   1 -13   6 4491.99 1935.98   1
   1 -13   6 8121.08 2191.02   1
  -1  13  -7  10066. 2226.86   1
  -1  13  -7 4693.80 1863.60   1
   1 -13   7 4286.70 1404.66   1
   1 -13   7 5222.68 2124.22   1
  -1  13  -8  30658. 2542.10   1
  -1  13  -8  29120. 2643.35   1
   1 -13   8  27978. 2346.21   1
   1 -13   8  29443. 2532.36   1
  -1  13  -9  10946. 2193.46   1
  -1  13  -9  17418. 2566.80   1
   1 -13   9 8893.52 1997.91   1
   1 -13   9 9679.88 2388.65   1
  -1  13 -10 4144.05 2323.59   1
  -1  13 -10 1264.09 1886.92   1
   1 -13  10 4794.71 2278.70   1
   1 -13  10 6096.03 1835.77   1
  -1  13 -11 2290.88 2489.91   1
  -1  13 -11 2280.10 2038.97   1
   1 -13  11  408.14 2177.10   1
   1 -13  11 -147.29 2298.19   1
  -1  13 -12 4516.35 2637.78   1
  -1  13 -12 3247.04 2024.01   1
   1 -13  12 1542.45 1891.09   1
   1 -13  12  216.63 2281.14   1
  -1  13 -13 -1896.7 1797.49   1
  -1  13 -13 -1840.3 2609.25   1
   1 -13  13 -2011.5 2149.62   1
   1 -13  13 -321.96 2136.74   1
  -1  13 -14 -3782.2 2691.37   1
  -1  13 -14 -686.85 2165.62   1
   1 -13  14 -399.79 2413.36   1
   1 -13  14 1029.57 2496.17   1
  -1  13 -15 7842.72 2861.51   1
  -1  13 -15  648.57 2463.81   1
   1 -13  15  696.59 2254.35   1
   1 -13  15 -1304.8 2538.62   1
  -1  13 -16 -3743.9 2197.98   1
  -1  13 -16 -750.52 2819.06   1
   1 -13  16 3439.45 2038.62   1
   1 -13  16 -3931.8 2451.98   1
  -1  13 -17 2644.40 1728.95   1
  -1  13 -17 6896.31 3051.84   1
   1 -13  17 2672.93 2627.35   1
   1 -13  17 -2369.5 2613.43   1
  -1  13 -18 5257.48 3165.27   1
  -1  13 -18 8406.39 2360.12   1
   1 -13  18  10459. 2830.20   1
   1 -13  18  10821. 2848.64   1
  -1  13 -19  12644. 3643.00   1
  -1  13 -19 3855.25 2594.99   1
   1 -13  19 3106.12 2670.49   1
   1 -13  19 1285.32 2917.53   1
  -1  13 -20 9363.25 3250.52   1
  -1  13 -20  10960. 2843.42   1
   1 -13  20  12599. 2993.73   1
   1 -13  20 6078.63 3010.44   1
  -1  12  17 8308.97 3036.53   1
  -1  12  17 8322.89 3942.24   1
   1 -12 -17 2029.92 3117.26   1
   1 -12 -17 6183.01 3022.61   1
  -1  12  16  22637. 3397.00   1
  -1  12  16  20752. 2960.68   1
   1 -12 -16  24495. 3241.12   1
   1 -12 -16  15828. 3228.25   1
  -1  12  15 8183.71 3106.82   1
  -1  12  15 7059.84 2645.44   1
   1 -12 -15 2468.68 2363.95   1
   1 -12 -15 6934.58 3143.70   1
  -1  12  14 3611.69 2660.40   1
  -1  12  14 3399.79 2249.82   1
   1 -12 -14 7713.98 2286.71   1
   1 -12 -14 6311.75 2962.77   1
  -1  12  13  11006. 2757.13   1
  -1  12  13 9759.91 2845.16   1
   1 -12 -13 7052.88 2939.11   1
   1 -12 -13 7021.57 2957.55   1
  -1  12  12 1195.89 2920.67   1
  -1  12  12 4196.24 2523.66   1
   1 -12 -12 5762.00 2900.83   1
   1 -12 -12  690.67 3035.14   1
  -1  12  11 2574.46 2598.47   1
  -1  12  11 3240.78 2455.11   1
   1 -12 -11 1479.82 2494.78   1
   1 -12 -11 2090.81 2770.35   1
  -1  12  10  13584. 2564.72   1
  -1  12  10  12596. 2550.80   1
   1 -12 -10  15205. 2019.83   1
   1 -12 -10  12801. 2763.74   1
  -1  12   9 1217.47 2224.77   1
  -1  12   9 7867.08 2803.06   1
   1 -12  -9 -602.64 2431.80   1
   1 -12  -9 5041.75 2752.96   1
  -1  12   8  386.57 2299.23   1
  -1  12   8 -3176.1 2163.19   1
   1 -12  -8 -1965.2 2015.66   1
  -1  12   7  11517. 2837.16   1
  -1  12   7 7414.75 2255.04   1
   1 -12  -7  12164. 2405.70   1
   1 -12  -7 7105.07 2423.10   1
  -1  12   6 7609.60 2184.76   1
  -1  12   6 4119.69 1815.59   1
   1 -12  -6 6430.06 1881.35   1
   1 -12  -6 5734.16 2557.76   1
  -1  12   5  37543. 2809.67   1
  -1  12   5  40049. 3267.92   1
   1 -12  -5  33706. 2655.88   1
   1 -12  -5  35595. 2875.78   1
  -1  12   4  15967. 2471.81   1
  -1  12   4  17029. 2368.82   1
   1 -12  -4  18271. 2410.58   1
   1 -12  -4  16406. 1752.61   1
  -1  12   3  15073. 2571.67   1
  -1  12   3  19061. 2383.44   1
   1 -12  -3  22157. 2331.94   1
   1 -12  -3  19482. 2415.45   1
  -1  12   2  29436. 2748.08   1
  -1  12   2  28622. 2382.39   1
   1 -12  -2  32056. 2456.50   1
   1 -12  -2  30324. 2459.29   1
  -1  12   1  13006. 2084.55   1
  -1  12   1  12453. 2443.98   1
   1 -12  -1  10703. 1936.67   1
   1 -12  -1 7752.25 2060.54   1
  -1  12   0 4032.70 2147.53   1
  -1  12   0 3681.28 1814.54   1
   1 -12   0  321.57 1813.15   1
   1 -12   0 2040.01 1862.21   1
  -1  12  -1 -1549.4 1902.92   1
  -1  12  -1 2556.02 1731.04   1
   1 -12   1 -1206.7 1784.27   1
   1 -12   1 -2522.3 1788.79   1
  -1  12  -2 -742.52 1825.68   1
  -1  12  -2 3576.89 1886.22   1
   1 -12   2 2324.28 1870.56   1
   1 -12   2 2118.65 1839.94   1
  -1  12  -3  45511. 2587.68   1
  -1  12  -3  48434. 2811.41   1
   1 -12   3  44920. 2705.63   1
   1 -12   3  45651. 2696.94   1
  -1  12  -4  52470. 2990.60   1
  -1  12  -4  50522. 2816.63   1
   1 -12   4  52505. 2896.31   1
   1 -12   4  50174. 2899.79   1
  -1  12  -5  26239. 2313.50   1
  -1  12  -5  23031. 2143.35   1
   1 -12   5  21719. 2338.90   1
   1 -12   5  19916. 2128.74   1
  -1  12  -6 -356.99 2038.27   1
  -1  12  -6 -1230.3 1513.57   1
   1 -12   6 1669.45 1678.50   1
   1 -12   6 2123.17 2115.52   1
  -1  12  -7 1160.05 1866.73   1
  -1  12  -7  399.09 1959.64   1
   1 -12   7 2982.25 1884.83   1
  -1  12  -8 2957.20 1861.17   1
  -1  12  -8 2683.71 2135.70   1
   1 -12   8 5073.06 1708.42   1
   1 -12   8 1040.36 1933.19   1
  -1  12  -9 2211.90 1934.93   1
  -1  12  -9 1809.67 2301.67   1
   1 -12   9  346.94 1981.56   1
   1 -12   9 -2043.1 1771.05   1
  -1  12 -10 9328.45 2036.88   1
  -1  12 -10 5187.89 2444.33   1
   1 -12  10 1727.90 2093.94   1
   1 -12  10 1224.08 2032.70   1
  -1  12 -11 3510.78 1995.47   1
  -1  12 -11 1573.07 2406.40   1
   1 -12  11  514.27 1749.82   1
   1 -12  11 -2772.1 2182.67   1
  -1  12 -12  11604. 2124.22   1
  -1  12 -12  10397. 2638.13   1
   1 -12  12  10108. 2212.25   1
   1 -12  12  14983. 2461.03   1
  -1  12 -13 4704.24 2594.99   1
  -1  12 -13 2226.86 2163.88   1
   1 -12  13 7101.59 2500.35   1
   1 -12  13 5250.52 2211.90   1
  -1  12 -14 2846.55 1514.61   1
  -1  12 -14 4283.22 2519.83   1
   1 -12  14 -1189.6 2099.86   1
   1 -12  14 3688.24 2417.19   1
  -1  12 -15 3035.14 2764.79   1
  -1  12 -15 5434.93 2291.93   1
   1 -12  15 4248.43 2691.02   1
   1 -12  15 5716.77 2703.20   1
  -1  12 -16 -1341.3 2734.17   1
  -1  12 -16 3385.87 2385.52   1
   1 -12  16 4286.70 2393.53   1
   1 -12  16 -2243.9 2648.57   1
  -1  12 -17 2654.49 2991.99   1
  -1  12 -17 6753.65 2241.13   1
   1 -12  17 1727.90 2000.35   1
   1 -12  17 1789.49 2518.44   1
  -1  12 -18  744.95 2854.21   1
  -1  12 -18 1127.70 2080.03   1
   1 -12  18 -2749.8 2758.52   1
   1 -12  18 -1594.3 2547.67   1
  -1  12 -19  39214. 3688.24   1
  -1  12 -19  33921. 2825.68   1
   1 -12  19  36082. 3298.88   1
   1 -12  19  33448. 3211.55   1
  -1  12 -20  302.05 2597.77   1
  -1  12 -20 3736.95 3214.68   1
   1 -12  20 2237.65 2924.49   1
   1 -12  20 1964.51 2647.88   1
  -1  12 -21 3632.56 2743.91   1
  -1  12 -21 3963.11 3213.64   1
   1 -12  21  13128. 2873.34   1
   1 -12  21 7355.59 3079.33   1
  -1  11  19 -286.12 2608.91   1
  -1  11  19 4144.05 2726.51   1
   1 -11 -19 3816.98 2983.30   1
   1 -11 -19 5194.85 2213.64   1
  -1  11  18   70.42 2501.74   1
  -1  11  18 -2761.0 2559.50   1
   1 -11 -18 1966.94 2313.15   1
   1 -11 -18 5932.49 2824.28   1
  -1  11  17 5490.60 2486.08   1
  -1  11  17  14725. 2725.47   1
   1 -11 -17 7978.42 3099.86   1
   1 -11 -17  15591. 2506.61   1
  -1  11  16  584.20 2978.08   1
  -1  11  16 -295.51 2362.21   1
   1 -11 -16 1645.09 2890.39   1
   1 -11 -16   96.87 2427.28   1
  -1  11  15 -291.86 3093.25   1
  -1  11  15 5772.44 2633.96   1
   1 -11 -15 1300.97 3184.76   1
   1 -11 -15 1166.67 2875.78   1
  -1  11  14 5918.57 3168.40   1
  -1  11  14  104.63 2467.29   1
   1 -11 -14 -1002.8 3097.77   1
   1 -11 -14 -2330.2 2824.98   1
  -1  11  13 1543.14 2478.77   1
  -1  11  13 -4916.5 2184.76   1
   1 -11 -13 -1764.4 2451.98   1
   1 -11 -13 -2433.5 2806.54   1
  -1  11  12  13198. 2368.47   1
  -1  11  12  11232. 2703.20   1
   1 -11 -12  12168. 2635.00   1
   1 -11 -12  16778. 2889.00   1
  -1  11  11 5097.42 2454.07   1
  -1  11  11 1914.06 2816.63   1
   1 -11 -11 2960.68 2586.64   1
   1 -11 -11  994.08 2852.12   1
  -1  11  10 2678.49 2050.80   1
  -1  11  10  325.16 2251.91   1
   1 -11 -10 1173.62 2635.70   1
   1 -11 -10 -598.47 1907.44   1
  -1  11   9 3803.06 2309.32   1
  -1  11   9 7686.14 2774.88   1
   1 -11  -9 9008.34 2492.69   1
   1 -11  -9 7018.09 2570.98   1
  -1  11   8  15891. 2389.70   1
  -1  11   8  16514. 2359.78   1
   1 -11  -8  16750. 2495.13   1
   1 -11  -8  17063. 1873.69   1
  -1  11   7  13372. 2668.75   1
  -1  11   7  14304. 2182.32   1
   1 -11  -7  15438. 2368.82   1
   1 -11  -7  13894. 2553.58   1
  -1  11   6 4457.20 2420.67   1
  -1  11   6  494.43 2010.09   1
   1 -11  -6 -710.16 1925.19   1
   1 -11  -6 -2223.0 2164.23   1
  -1  11   5  47808. 3078.63   1
  -1  11   5  47251. 2966.94   1
   1 -11  -5  42136. 2682.67   1
   1 -11  -5  44189. 3000.35   1
  -1  11   4 5226.16 2121.78   1
  -1  11   4 4154.48 1920.32   1
   1 -11  -4 4415.44 1913.36   1
   1 -11  -4 4679.88 2067.85   1
  -1  11   3  37717. 2554.63   1
  -1  11   3  35630. 2872.30   1
   1 -11  -3  41301. 2787.05   1
   1 -11  -3  42519. 2805.49   1
  -1  11   2 9081.41 2032.70   1
  -1  11   2 8987.46 2218.16   1
   1 -11  -2 9394.56 1934.58   1
   1 -11  -2 7693.10 2073.41   1
  -1  11   1  25852. 2463.12   1
  -1  11   1  24367. 2198.68   1
   1 -11  -1  23914. 2248.78   1
   1 -11  -1  27387. 2250.17   1
  -1  11   0  29447. 2395.61   1
  -1  11   0  30487. 2424.15   1
   1 -11   0  31266. 2347.60   1
   1 -11   0  29165. 2178.15   1
  -1  11  -1  23229. 2108.21   1
  -1  11  -1  19158. 2193.46   1
   1 -11   1  24809. 2144.05   1
   1 -11   1  19819. 2067.50   1
  -1  11  -2  14339. 2010.78   1
  -1  11  -2  10445. 1851.77   1
   1 -11   2  14172. 2012.52   1
   1 -11   2  11197. 1927.28   1
  -1  11  -3 4812.10 1825.33   1
  -1  11  -3 3663.88 1579.33   1
   1 -11   3 -891.44 1684.06   1
   1 -11   3 3459.29 1763.39   1
  -1  11  -4  19795. 2258.52   1
  -1  11  -4  20553. 1952.68   1
   1 -11   4  19516. 1974.25   1
   1 -11   4  19941. 2214.33   1
  -1  11  -5  29537. 2431.45   1
  -1  11  -5  27244. 2111.69   1
   1 -11   5  26228. 2308.97   1
   1 -11   5  25372. 2207.03   1
  -1  11  -6 5570.63 1694.85   1
  -1  11  -6 6238.69 2172.58   1
   1 -11   6 6722.33 1863.95   1
   1 -11   6 8785.66 1969.03   1
  -1  11  -7  14562. 2272.09   1
  -1  11  -7  15661. 1950.24   1
   1 -11   7  16225. 2109.60   1
  -1  11  -8  16110. 2409.88   1
  -1  11  -8  20031. 2105.08   1
   1 -11   8  16124. 2225.47   1
   1 -11   8  11555. 1856.99   1
  -1  11  -9  59012. 2996.17   1
  -1  11  -9  62561. 3514.26   1
   1 -11   9  55741. 2813.85   1
   1 -11   9  55985. 3152.75   1
  -1  11 -10 6624.91 2341.68   1
  -1  11 -10 2105.77 1929.71   1
   1 -11  10 2480.16 2050.10   1
   1 -11  10 6597.07 1925.54   1
  -1  11 -11  44781. 3105.77   1
  -1  11 -11  40710. 2712.59   1
   1 -11  11  43528. 2858.03   1
   1 -11  11  46694. 3114.12   1
  -1  11 -12  12370. 2555.32   1
  -1  11 -12  13354. 2094.29   1
   1 -11  12  16305. 1792.62   1
   1 -11  12  19652. 2457.55   1
  -1  11 -13 8364.64 2580.72   1
  -1  11 -13 5264.44 2155.18   1
   1 -11  13 6329.15 2221.29   1
   1 -11  13 5995.12 2307.24   1
  -1  11 -14 4808.62 2568.54   1
  -1  11 -14  774.18 1983.64   1
   1 -11  14 -299.30 1711.20   1
   1 -11  14 -633.96 2250.17   1
  -1  11 -15 4168.40 2385.87   1
  -1  11 -15 -347.84 2605.77   1
   1 -11  15 9759.91 2627.69   1
   1 -11  15 4290.18 2516.00   1
  -1  11 -16 6377.86 2304.10   1
  -1  11 -16 5922.05 2662.84   1
   1 -11  16    4.62 2246.00   1
   1 -11  16 2477.73 2550.10   1
  -1  11 -17 -4714.7 2641.61   1
  -1  11 -17 -793.67 1623.17   1
   1 -11  17 1579.33 2563.67   1
   1 -11  17 2912.66 2413.71   1
  -1  11 -18 5407.09 2395.27   1
  -1  11 -18 3264.78 2739.73   1
   1 -11  18 -169.66 2860.12   1
   1 -11  18 1398.75 2519.83   1
  -1  11 -19 7745.30 2672.93   1
  -1  11 -19 7839.24 2546.62   1
   1 -11  19  11503. 2706.33   1
   1 -11  19  12543. 3216.77   1
  -1  11 -20 2543.84 3032.36   1
  -1  11 -20 3452.68 2525.05   1
   1 -11  20 2496.17 2906.75   1
   1 -11  20 3251.56 2656.23   1
  -1  11 -21 -1260.6 3211.55   1
  -1  11 -21 -1116.2 2321.85   1
   1 -11  21 1909.88 2469.73   1
   1 -11  21 -1108.6 2761.31   1
  -1  11 -22 5455.81 3005.91   1
  -1  11 -22 5187.89 2537.58   1
   1 -11  22 4321.50 2617.60   1
   1 -11  22 2064.02 2829.50   1
  -1  10  20 -262.04 3230.34   1
  -1  10  20  426.93 2932.50   1
   1 -10 -20 -427.97 3008.35   1
   1 -10 -20 5243.56 3072.37   1
  -1  10  19 3632.56 2719.55   1
  -1  10  19 -1643.0 3246.34   1
   1 -10 -19 -1175.7 3035.49   1
   1 -10 -19 2305.84 3159.36   1
  -1  10  18 6022.96 2669.45   1
  -1  10  18 4592.90 3409.88   1
   1 -10 -18 -1672.9 3024.35   1
   1 -10 -18 -1898.7 2895.61   1
  -1  10  17 2141.61 3376.82   1
  -1  10  17 -1862.2 2495.13   1
   1 -10 -17 -251.77 2732.77   1
   1 -10 -17 -488.17 2982.95   1
  -1  10  16 -508.70 2591.86   1
  -1  10  16 3337.51 3268.26   1
   1 -10 -16 7974.94 3043.49   1
   1 -10 -16 -2309.0 2863.95   1
  -1  10  15 1188.59 3156.57   1
  -1  10  15 2255.04 2312.11   1
   1 -10 -15 -3945.7 2721.64   1
  -1  10  14 5274.87 2252.61   1
  -1  10  14 8228.94 2421.01   1
   1 -10 -14 7741.82 2091.86   1
   1 -10 -14 7132.91 2760.61   1
  -1  10  13 2198.68 2801.67   1
  -1  10  13 3165.97 2400.83   1
   1 -10 -13 4864.30 2598.81   1
   1 -10 -13 2620.39 2641.96   1
  -1  10  12  455.46 2883.09   1
  -1  10  12  558.80 2337.85   1
   1 -10 -12 4979.12 2905.70   1
   1 -10 -12 3013.22 2560.54   1
  -1  10  11 3709.11 2425.19   1
  -1  10  11 4585.94 2235.21   1
   1 -10 -11  980.86 1802.71   1
   1 -10 -11  758.52 2456.50   1
  -1  10  10  11667. 2059.50   1
  -1  10  10 7484.34 2700.76   1
   1 -10 -10  11242. 2538.62   1
   1 -10 -10 7620.03 2310.37   1
  -1  10   9 -1040.0 2140.92   1
  -1  10   9 -3426.6 2575.15   1
   1 -10  -9 3284.62 2138.13   1
   1 -10  -9 1062.63 2364.30   1
  -1  10   8  50626. 3196.24   1
  -1  10   8  47356. 2826.02   1
   1 -10  -8  44433. 3076.20   1
   1 -10  -8  47843. 2902.57   1
  -1  10   7 5114.82 2095.34   1
  -1  10   7 4070.98 2490.95   1
   1 -10  -7 3405.01 2155.88   1
   1 -10  -7 3667.36 2227.90   1
  -1  10   6  -81.87 2240.08   1
  -1  10   6 -1386.9 1969.38   1
   1 -10  -6 1678.15 2121.08   1
   1 -10  -6 1353.51 1911.62   1
  -1  10   5  48991. 3339.59   1
  -1  10   5  38622. 2590.46   1
   1 -10  -5  42136. 2797.84   1
   1 -10  -5  35560. 2663.88   1
  -1  10   4 4512.87 2319.41   1
  -1  10   4 1818.72 1585.94   1
   1 -10  -4 4231.03 1955.46   1
   1 -10  -4 4676.40 2015.31   1
  -1  10   3 1560.19 2239.04   1
  -1  10   3  206.75 1663.88   1
   1 -10  -3 -1063.7 1970.42   1
   1 -10  -3  462.07 1892.13   1
  -1  10   2  16040. 2318.72   1
  -1  10   2  13744. 2022.27   1
   1 -10  -2  17161. 2168.75   1
   1 -10  -2  15689. 2356.99   1
  -1  10   1 1720.25 1889.35   1
  -1  10   1 1248.43 2035.84   1
   1 -10  -1 -932.15 1910.92   1
   1 -10  -1 1445.37 1883.78   1
  -1  10   0  26688. 2090.81   1
  -1  10   0  25654. 2333.33   1
   1 -10   0  24795. 2237.30   1
   1 -10   0  25327. 2243.91   1
  -1  10  -1 5431.45 1960.68   1
  -1  10  -1 5995.12 1734.51   1
   1 -10   1 5073.06 1829.85   1
   1 -10   1 3479.47 1839.25   1
  -1  10  -2  46868. 2616.21   1
  -1  10  -2  42832. 2730.34   1
   1 -10   2  45337. 2667.01   1
   1 -10   2  42693. 2594.99   1
  -1  10  -3 6506.60 1972.16   1
  -1  10  -3 4234.51 1787.75   1
   1 -10   3 7105.07 1931.45   1
   1 -10   3 3020.53 1802.71   1
  -1  10  -4 -1185.8 1970.07   1
  -1  10  -4 1772.09 1732.08   1
   1 -10   4 1959.98 1768.61   1
   1 -10   4  -99.72 1794.01   1
  -1  10  -5 -932.50 1965.90   1
  -1  10  -5 -657.27 1787.05   1
   1 -10   5 1929.71 1716.77   1
   1 -10   5  472.51 1960.33   1
  -1  10  -6  415.10 2112.73   1
  -1  10  -6 -220.60 1780.10   1
   1 -10   6  546.62 1684.41   1
   1 -10   6  409.53 1932.15   1
  -1  10  -7  -73.10 1996.17   1
  -1  10  -7 -1562.6 1861.17   1
   1 -10   7  175.75 1316.28   1
   1 -10   7 -3377.5 1794.01   1
  -1  10  -8  34342. 2386.91   1
  -1  10  -8  32610. 2619.34   1
   1 -10   8  32523. 2132.91   1
   1 -10   8  38657. 2634.65   1
  -1  10  -9 7686.14 1958.94   1
  -1  10  -9 5264.44 2391.79   1
   1 -10   9 5267.91 1690.67   1
   1 -10   9 7828.80 2005.91   1
  -1  10 -10 -512.87 2162.14   1
  -1  10 -10 -1015.3 1720.60   1
   1 -10  10 -309.36 1949.55   1
   1 -10  10 -1053.9 1851.77   1
  -1  10 -11 7860.12 1935.63   1
  -1  10 -11 3332.98 2332.29   1
   1 -10  11 5835.07 2061.58   1
   1 -10  11 5601.94 2196.59   1
  -1  10 -12 1774.53 2357.34   1
  -1  10 -12 4728.60 1428.67   1
   1 -10  12 4930.41 2105.43   1
   1 -10  12 1315.24 1753.30   1
  -1  10 -13 -5417.5 2297.84   1
  -1  10 -13 1094.29 2035.14   1
   1 -10  13 2454.76 2033.05   1
   1 -10  13 -263.43 2180.23   1
  -1  10 -14 4554.62 2432.15   1
  -1  10 -14 5984.68 2206.68   1
   1 -10  14 3182.32 2443.28   1
   1 -10  14 1150.31 2063.32   1
  -1  10 -15 3910.92 2488.86   1
  -1  10 -15 6050.79 2314.19   1
   1 -10  15 4899.09 2262.35   1
   1 -10  15 6318.71 1997.56   1
  -1  10 -16  31322. 2953.37   1
  -1  10 -16  36360. 2632.22   1
   1 -10  16  34384. 3047.67   1
   1 -10  16  34109. 2691.37   1
  -1  10 -17 4311.06 2316.63   1
  -1  10 -17 1532.71 2466.25   1
   1 -10  17 7393.87 2675.71   1
   1 -10  17 -186.81 2441.54   1
  -1  10 -18 3931.80 2073.41   1
  -1  10 -18 2623.52 2598.47   1
   1 -10  18 4603.34 2389.35   1
   1 -10  18 2194.50 2524.35   1
  -1  10 -19  12561. 2863.25   1
  -1  10 -19  10251. 1865.69   1
   1 -10  19 9324.97 2727.21   1
   1 -10  19 6889.35 2122.13   1
  -1  10 -20 -116.42 2647.88   1
  -1  10 -20 2518.44 2153.79   1
   1 -10  20 4474.60 2683.71   1
   1 -10  20 -826.72 2401.53   1
  -1  10 -21  932.50 2779.40   1
  -1  10 -21 -3313.8 2478.77   1
   1 -10  21  140.40 2838.20   1
   1 -10  21 1958.94 2635.35   1
  -1  10 -22 -419.28 2542.10   1
  -1  10 -22 4008.35 3208.42   1
   1 -10  22  715.38 2878.56   1
   1 -10  22 2819.06 2937.71   1
  -1  10 -23 -181.91 2713.64   1
  -1  10 -23 -3716.1 2989.21   1
   1 -10  23 2207.37 2790.88   1
   1 -10  23  -52.85 2932.84   1
  -1  10 -24 -1907.8 2800.97   1
   1 -10  24 -3033.4 2704.59   1
  -1   9  21 1720.94 3116.56   1
  -1   9  21 5365.34 2927.28   1
   1  -9 -21 4759.91 3106.12   1
   1  -9 -21 7275.57 3141.61   1
  -1   9  20 -297.49 2598.12   1
  -1   9  20 1551.49 2615.52   1
   1  -9 -20 6778.00 3048.36   1
   1  -9 -20  392.14 2895.96   1
  -1   9  19 2096.03 2460.33   1
  -1   9  19 -1745.6 2911.97   1
   1  -9 -19 1427.97 2675.36   1
   1  -9 -19 1580.72 2895.61   1
  -1   9  18 8187.19 3048.01   1
  -1   9  18  14064. 2667.36   1
   1  -9 -18  11009. 2941.19   1
   1  -9 -18  10550. 2488.52   1
  -1   9  17 4968.68 2777.31   1
  -1   9  17 -8030.6 3397.70   1
   1  -9 -17 -540.71 2779.05   1
   1  -9 -17 1212.59 3032.36   1
  -1   9  16  10164. 3970.07   1
  -1   9  16 -2756.4 2296.10   1
   1  -9 -16  763.05 2893.87   1
   1  -9 -16 -398.75 2917.53   1
  -1   9  15 8796.09 3197.63   1
  -1   9  15  11834. 2739.73   1
   1  -9 -15 7324.28 2797.14   1
   1  -9 -15 6687.54 2961.38   1
  -1   9  14 2379.96 2211.90   1
  -1   9  14 4547.66 2519.83   1
   1  -9 -14 8837.85 2207.03   1
   1  -9 -14  10132. 2766.52   1
  -1   9  13 5535.83 2845.16   1
  -1   9  13 7094.63 2502.43   1
   1  -9 -13 8093.24 2702.15   1
   1  -9 -13 5570.63 2548.01   1
  -1   9  12  538.62 2624.91   1
  -1   9  12  581.07 2292.97   1
   1  -9 -12 3334.03 2581.76   1
   1  -9 -12 2410.58 2317.33   1
  -1   9  11 2722.68 2054.28   1
  -1   9  11 4032.70 2615.52   1
   1  -9 -11 3281.83 2375.08   1
   1  -9 -11  -79.82 2511.13   1
  -1   9  10  628.39 2142.31   1
  -1   9  10 -1254.7 2374.04   1
   1  -9 -10 1459.29 2243.21   1
   1  -9 -10 1229.30 2263.05   1
  -1   9   9  21451. 2754.69   1
  -1   9   9  20880. 2106.82   1
   1  -9  -9  24175. 2468.68   1
   1  -9  -9  18138. 2549.41   1
  -1   9   8  11795. 2094.29   1
  -1   9   8 9878.21 2443.98   1
   1  -9  -8  11465. 2199.02   1
   1  -9  -8  11517. 2270.70   1
  -1   9   7 3764.78 2306.19   1
  -1   9   7 4043.14 1747.04   1
   1  -9  -7 1607.51 1967.99   1
   1  -9  -7 6510.08 2028.88   1
  -1   9   6 3189.63 2216.07   1
  -1   9   6 2012.52 1703.20   1
   1  -9  -6  932.85 1905.01   1
   1  -9  -6 1340.29 1867.43   1
  -1   9   5 -1142.0 2270.35   1
  -1   9   5 -1142.3 1615.52   1
   1  -9  -5 -2206.0 1843.42   1
   1  -9  -5 -253.65 1870.56   1
  -1   9   4 2504.17 2137.44   1
  -1   9   4 2471.12 1674.32   1
   1  -9  -4  200.66 1787.75   1
   1  -9  -4   91.72 1995.82   1
  -1   9   3  34482. 2689.63   1
  -1   9   3  34934. 2316.98   1
   1  -9  -3  33323. 2363.60   1
   1  -9  -3  30129. 2479.82   1
  -1   9   2 3674.32 1697.98   1
  -1   9   2 6082.11 2090.12   1
   1  -9  -2 7181.62 1814.54   1
   1  -9  -2 5876.82 1914.75   1
  -1   9   1 102053. 4286.70   1
  -1   9   1 101113. 4418.92   1
   1  -9  -1  99165. 4237.99   1
   1  -9  -1  99722. 4328.46   1
  -1   9   0  10992. 1961.03   1
  -1   9   0 8997.90 1738.34   1
   1  -9   0  11524. 1918.58   1
   1  -9   0  13573. 1907.10   1
  -1   9  -1 6948.50 1777.66   1
  -1   9  -1 8141.95 1884.13   1
   1  -9   1 4812.10 1802.36   1
   1  -9   1 4464.16 1722.34   1
  -1   9  -2 -986.08 1833.33   1
  -1   9  -2 2239.39 1671.88   1
   1  -9   2 2441.19 1759.57   1
   1  -9   2  117.43 1504.87   1
  -1   9  -3 -1048.0 1749.13   1
  -1   9  -3 -1050.8 1662.84   1
   1  -9   3 -193.95 1623.87   1
   1  -9   3 -316.98 1624.91   1
  -1   9  -4  33427. 2458.94   1
  -1   9  -4  30595. 2175.02   1
   1  -9   4  28873. 2189.98   1
   1  -9   4  31207. 2297.14   1
  -1   9  -5 7863.60 1938.06   1
  -1   9  -5 8312.45 1774.53   1
   1  -9   5 8420.31 1851.77   1
   1  -9   5 4679.88 1890.05   1
  -1   9  -6  16235. 2114.47   1
  -1   9  -6  19349. 2021.22   1
   1  -9   6  15097. 1906.05   1
   1  -9   6  18514. 2145.09   1
  -1   9  -7  41928. 2566.80   1
  -1   9  -7  42867. 2823.24   1
   1  -9   7  39074. 2485.04   1
   1  -9   7  36221. 2586.98   1
  -1   9  -8 1549.41 1852.12   1
  -1   9  -8 1016.00 1954.77   1
   1  -9   8 -215.24 1717.81   1
   1  -9   8 -1377.5 1711.20   1
  -1   9  -9  14154. 2211.90   1
  -1   9  -9  14934. 1971.12   1
   1  -9   9  12634. 1999.65   1
   1  -9   9  11239. 1843.77   1
  -1   9 -10 2727.21 1775.57   1
  -1   9 -10 1520.88 2012.18   1
   1  -9  10 1707.03 1483.99   1
   1  -9  10  377.17 1792.62   1
  -1   9 -11 3869.17 2036.18   1
  -1   9 -11 -584.90 1753.30   1
   1  -9  11 3785.66 1901.18   1
   1  -9  11  898.40 1625.96   1
  -1   9 -12 1734.17 2204.94   1
  -1   9 -12 -266.56 1795.06   1
   1  -9  12 -1037.9 1854.90   1
   1  -9  12 -1743.2 1833.33   1
  -1   9 -13  31315. 2884.13   1
  -1   9 -13  34464. 2606.82   1
   1  -9  13  31691. 2766.18   1
   1  -9  13  32011. 2701.46   1
  -1   9 -15 1151.70 2335.07   1
  -1   9 -15 6774.52 2364.30   1
   1  -9  15 2692.41 2645.09   1
   1  -9  15 4606.81 2235.91   1
  -1   9 -16  22498. 2037.92   1
  -1   9 -16  24829. 2703.89   1
   1  -9  16  23566. 2247.74   1
   1  -9  16  22356. 2535.84   1
  -1   9 -17 2676.41 2254.70   1
  -1   9 -17 2590.46 2587.68   1
   1  -9  17 5000.00 2681.63   1
   1  -9  17 3193.46 2169.80   1
  -1   9 -18 7164.22 2678.15   1
  -1   9 -18 5727.20 2418.58   1
   1  -9  18 -2432.1 2565.76   1
   1  -9  18 3517.74 2720.60   1
  -1   9 -19 -1042.8 2174.32   1
  -1   9 -19 -442.59 2610.64   1
   1  -9  19 -369.17 2381.35   1
   1  -9  19 1732.43 2348.64   1
  -1   9 -20  12815. 2956.16   1
  -1   9 -20  12585. 1927.28   1
   1  -9  20  17060. 2955.11   1
   1  -9  20  14711. 2108.91   1
  -1   9 -21 4318.02 2937.37   1
  -1   9 -21 3367.43 1942.24   1
   1  -9  21 -3893.5 2065.06   1
   1  -9  21 1229.30 2597.77   1
  -1   9 -22 4439.80 2982.60   1
  -1   9 -22 6137.78 2400.83   1
   1  -9  22 4352.81 2235.56   1
   1  -9  22 3271.74 2693.11   1
  -1   9 -23  15219. 3521.22   1
  -1   9 -23  14388. 2139.52   1
   1  -9  23  16875. 2667.01   1
   1  -9  23  18747. 3158.31   1
  -1   9 -24 4721.64 3010.78   1
  -1   9 -24 2143.00 2143.00   1
   1  -9  24  859.43 2107.17   1
   1  -9  24  544.19 3026.79   1
  -1   8  22 4046.62 2928.67   1
  -1   8  22 -1534.8 2807.58   1
   1  -8 -22 2728.60 2762.00   1
   1  -8 -22 4217.11 3341.33   1
  -1   8  21 4839.94 2636.39   1
  -1   8  21 3823.94 2096.73   1
   1  -8 -21 7581.76 2363.95   1
   1  -8 -21 7564.36 3124.91   1
  -1   8  20 -171.57 2599.51   1
  -1   8  20   92.73 2672.58   1
   1  -8 -20 4697.28 3021.92   1
   1  -8 -20 -1263.4 2091.16   1
  -1   8  19 1108.91 2726.86   1
   1  -8 -19  391.44 2375.08   1
   1  -8 -19 -6569.2 3117.60   1
  -1   8  18 -2224.4 2807.58   1
  -1   8  18 -2259.2 2702.15   1
   1  -8 -18 6416.14 3234.86   1
   1  -8 -18 -2508.0 2383.44   1
  -1   8  17 2986.77 2384.13   1
  -1   8  17 -2472.9 2605.43   1
   1  -8 -17 -597.42 1844.81   1
   1  -8 -17 -608.21 2971.81   1
  -1   8  16 5020.87 2389.00   1
  -1   8  16 9008.34 2291.23   1
   1  -8 -16 6287.40 2034.10   1
   1  -8 -16 5038.27 3013.57   1
  -1   8  15 1327.42 2700.76   1
  -1   8  15 -1782.9 2537.23   1
   1  -8 -15 -1829.2 2609.60   1
   1  -8 -15 2638.13 2861.17   1
  -1   8  14  31566. 3456.85   1
  -1   8  14  31454. 3033.75   1
   1  -8 -14  24697. 3052.19   1
   1  -8 -14  31079. 3364.30   1
  -1   8  13 2946.41 2100.55   1
  -1   8  13 -907.10 2124.91   1
   1  -8 -13 2051.84 2005.91   1
   1  -8 -13 -1872.3 2438.41   1
  -1   8  12 2887.96 2255.04   1
  -1   8  12 5434.93 2810.37   1
   1  -8 -12   22.09 2755.74   1
   1  -8 -12  -56.33 2500.00   1
  -1   8  11 -292.83 1821.50   1
  -1   8  11 3660.40 2209.11   1
   1  -8 -11 -2753.0 2270.00   1
   1  -8 -11 -1443.3 1831.24   1
  -1   8  10  -13.08 1880.30   1
  -1   8  10 -1183.0 2382.74   1
   1  -8 -10 -1994.4 2280.79   1
   1  -8 -10  382.05 2035.84   1
  -1   8   9 3271.74 2384.83   1
  -1   8   9 4151.01 1895.96   1
   1  -8  -9 3761.30 2108.21   1
   1  -8  -9 4057.06 2212.25   1
  -1   8   8 2897.70 2221.29   1
  -1   8   8 3869.17 1747.04   1
   1  -8  -8 6555.32 2025.05   1
   1  -8  -8 5647.18 1866.04   1
  -1   8   7  22182. 2479.47   1
  -1   8   7  21694. 2017.40   1
   1  -8  -7  24402. 2191.72   1
  -1   8   6 3246.00 1856.30   1
  -1   8   6 1823.94 1516.00   1
   1  -8  -6 1636.39 1746.69   1
   1  -8  -6 2831.94 1925.89   1
  -1   8   5  36778. 2707.72   1
  -1   8   5  36500. 2376.13   1
   1  -8  -5  35804. 2306.19   1
   1  -8  -5  34276. 2476.69   1
  -1   8   4 5949.89 1764.79   1
  -1   8   4  11628. 2220.60   1
   1  -8  -4  10825. 1929.71   1
   1  -8  -4 7623.51 1982.25   1
  -1   8   3  20459. 2014.61   1
  -1   8   3  20759. 2426.23   1
   1  -8  -3  19920. 2107.86   1
   1  -8  -3  22543. 2259.57   1
  -1   8   2 9888.65 2202.16   1
  -1   8   2  10452. 1799.58   1
   1  -8  -2 6972.85 2112.38   1
   1  -8  -2 8493.38 1844.81   1
  -1   8   1 -1612.0 1692.76   1
  -1   8   1 -624.91 2059.84   1
   1  -8  -1 1032.71 1626.65   1
   1  -8  -1 -136.46 1866.39   1
  -1   8   0  30852. 2351.08   1
  -1   8   0  30557. 2352.12   1
   1  -8   0  29005. 2390.05   1
   1  -8   0  30244. 2287.75   1
  -1   8  -1  12811. 2015.66   1
  -1   8  -1  14151. 1813.50   1
   1  -8   1  13201. 1923.45   1
   1  -8   1  11447. 1920.67   1
  -1   8  -2 -578.98 1800.62   1
  -1   8  -2 2739.04 1681.97   1
   1  -8   2 1285.32 1678.84   1
   1  -8   2 1300.97 1700.42   1
  -1   8  -3  24548. 2241.13   1
  -1   8  -3  29088. 2183.02   1
   1  -8   3  30567. 2256.78   1
   1  -8   3  27610. 2172.58   1
  -1   8  -4  84168. 3872.65   1
  -1   8  -4  80654. 3587.33   1
   1  -8   4  83333. 3754.35   1
   1  -8   4  84203. 3785.66   1
  -1   8  -5  853.86 1718.51   1
  -1   8  -5 1774.53 1850.38   1
   1  -8   5 3997.91 1722.68   1
   1  -8   5 3472.16 1946.07   1
  -1   8  -6  91649. 3897.00   1
  -1   8  -6  79262. 3799.58   1
   1  -8   6  87787. 3952.68   1
   1  -8   6  90292. 3931.80   1
  -1   8  -7 1370.56 1867.43   1
  -1   8  -7 1196.94 1744.95   1
   1  -8   7  409.88 1701.81   1
   1  -8   7 -323.31 1771.74   1
  -1   8  -8  36500. 2214.68   1
  -1   8  -8  37613. 2585.59   1
   1  -8   8  34739. 2025.05   1
   1  -8   8  34969. 2348.64   1
  -1   8  -9  960.68 1810.37   1
  -1   8  -9 1107.17 1711.55   1
   1  -8   9 2659.71 1719.21   1
   1  -8   9 2935.63 1883.09   1
  -1   8 -10  27206. 2232.08   1
  -1   8 -10  29342. 2359.78   1
   1  -8  10  33114. 2513.22   1
   1  -8  10  26294. 2132.91   1
  -1   8 -11  170.98 1914.06   1
  -1   8 -11 -1553.9 1732.43   1
   1  -8  11  814.54 1811.76   1
   1  -8  11  418.93 1788.79   1
  -1   8 -12  76896. 3750.87   1
  -1   8 -12  80028. 3723.03   1
   1  -8  12  79019. 3698.67   1
   1  -8  12  77557. 3653.44   1
  -1   8 -13  25501. 2538.97   1
  -1   8 -13  34217. 2511.48   1
   1  -8  13  27272. 2532.36   1
   1  -8  13  29054. 2366.39   1
  -1   8 -14 9923.44 1597.42   1
  -1   8 -14  12352. 2475.29   1
   1  -8  14  16127. 2244.60   1
   1  -8  14 9592.89 2069.59   1
  -1   8 -15  12387. 2267.92   1
  -1   8 -15  14805. 2572.72   1
   1  -8  15 8820.45 2472.86   1
   1  -8  15  14662. 2379.61   1
  -1   8 -16 2975.64 2576.55   1
  -1   8 -16 3206.68 1628.39   1
   1  -8  16 -319.59 2207.03   1
   1  -8  16 1310.72 2217.81   1
  -1   8 -17  865.00 2395.27   1
  -1   8 -17 1550.10 2736.25   1
   1  -8  17 3244.60 2670.49   1
   1  -8  17 4046.62 2307.58   1
  -1   8 -18 -449.55 2641.26   1
  -1   8 -18 2138.83 2258.52   1
   1  -8  18 -382.39 2508.00   1
   1  -8  18 -1821.2 2284.62   1
  -1   8 -19  10386. 2670.49   1
  -1   8 -19 3120.73 1732.08   1
   1  -8  19 7780.09 1906.40   1
   1  -8  19 5553.23 2343.07   1
  -1   8 -20 -4610.3 2670.49   1
  -1   8 -20 1807.58 2112.04   1
   1  -8  20 -2422.4 2012.52   1
   1  -8  20 1106.12 2796.80   1
  -1   8 -21 -994.08 2788.10   1
  -1   8 -21 -560.19 2235.21   1
   1  -8  21 -836.46 1993.04   1
   1  -8  21 -5337.5 2847.60   1
  -1   8 -22 6464.85 2830.20   1
  -1   8 -22 2391.79 2499.65   1
   1  -8  22 2727.21 2360.82   1
   1  -8  22 4495.47 2823.59   1
  -1   8 -23 2897.70 2132.22   1
  -1   8 -23  797.84 2814.19   1
   1  -8  23 3792.62 2431.80   1
   1  -8  23  281.87 2806.19   1
  -1   8 -24 2242.17 2616.56   1
  -1   8 -24 -1789.8 3374.04   1
   1  -8  24 5076.54 2097.42   1
   1  -8  24 -910.58 2803.41   1
  -1   8 -25 3750.87 2942.24   1
  -1   8 -25 2061.58 3022.61   1
   1  -8  25 -2368.5 2960.33   1
   1  -8  25 2893.87 2723.73   1
  -1   7  23 2353.16 2432.84   1
  -1   7  23 -2750.5 2848.64   1
   1  -7 -23 3935.28 2321.15   1
   1  -7 -23 1135.00 3234.51   1
  -1   7  22 -1145.8 2908.14   1
  -1   7  22  -57.97 2509.74   1
   1  -7 -22 1997.91 2816.28   1
   1  -7 -22 3688.24 3228.95   1
  -1   7  21  18956. 3236.95   1
  -1   7  21  25181. 3188.58   1
   1  -7 -21  21628. 3276.96   1
   1  -7 -21  22467. 3308.63   1
  -1   7  20  -36.50 2787.40   1
  -1   7  20  349.69 2800.62   1
   1  -7 -20 -2907.4 2693.80   1
   1  -7 -20 1558.11 3101.60   1
  -1   7  19  23890. 2835.42   1
  -1   7  19  22836. 3062.63   1
   1  -7 -19  23768. 2862.21   1
   1  -7 -19  17766. 3510.78   1
  -1   7  18 -811.76 2519.83   1
  -1   7  18 2209.81 2707.03   1
   1  -7 -18 -1573.4 2348.99   1
   1  -7 -18 -1827.4 3161.79   1
  -1   7  17 -287.09 2372.30   1
  -1   7  17  663.19 2765.13   1
   1  -7 -17 4620.73 2346.55   1
   1  -7 -17 -141.65 2794.01   1
  -1   7  16 2240.08 2424.49   1
  -1   7  16 3240.43 3068.89   1
   1  -7 -16 5233.12 2752.26   1
   1  -7 -16  227.35 2948.50   1
  -1   7  15  43006. 3792.62   1
  -1   7  15  36012. 3080.37   1
   1  -7 -15  36917. 3370.91   1
   1  -7 -15  40745. 3369.52   1
  -1   7  14 9029.22 2371.61   1
  -1   7  14  18250. 2993.39   1
   1  -7 -14  10609. 2529.92   1
   1  -7 -14  11138. 2883.09   1
  -1   7  13 7606.12 2146.14   1
  -1   7  13  11399. 2038.97   1
   1  -7 -13 8973.55 2421.36   1
   1  -7 -13 9777.30 2015.31   1
  -1   7  12 5132.21 2605.43   1
  -1   7  12 5758.52 2099.51   1
   1  -7 -12 1395.27 2552.89   1
   1  -7 -12 3455.46 2294.36   1
  -1   7  11  12505. 2410.23   1
  -1   7  11 6033.40 1629.09   1
   1  -7 -11 7268.61 2210.16   1
   1  -7 -11 7835.76 2093.94   1
  -1   7  10 1534.79 1610.30   1
  -1   7  10  919.62 1791.23   1
   1  -7 -10 2599.51 1627.35   1
   1  -7 -10 2849.68 2131.52   1
  -1   7   9  25181. 2356.99   1
  -1   7   9  22787. 2098.12   1
   1  -7  -9  23090. 2146.14   1
   1  -7  -9  22610. 2187.19   1
  -1   7   8 5521.92 1840.64   1
  -1   7   8 1641.26 1772.79   1
   1  -7  -8 2196.59 1492.69   1
   1  -7  -8 2394.57 1901.18   1
  -1   7   7  43563. 2660.40   1
  -1   7   7  43076. 2908.49   1
   1  -7  -7  44676. 2695.89   1
   1  -7  -7  42345. 2684.41   1
  -1   7   6  28726. 2588.03   1
  -1   7   6  30049. 2296.45   1
   1  -7  -6  30118. 2426.23   1
   1  -7  -6  31524. 2325.68   1
  -1   7   5 -896.66 1690.67   1
  -1   7   5 4794.71 2244.95   1
   1  -7  -5  453.03 1815.59   1
   1  -7  -5 -1414.1 1802.02   1
  -1   7   4  30578. 2608.91   1
  -1   7   4  32902. 2318.02   1
   1  -7  -4  30477. 2345.51   1
   1  -7  -4  29934. 2258.87   1
  -1   7   3 4930.41 2114.12   1
  -1   7   3 7247.73 1594.99   1
   1  -7  -3 9537.22 1918.58   1
   1  -7  -3 8583.85 1972.16   1
  -1   7   2 6677.10 2055.67   1
  -1   7   2 4401.53 1752.96   1
   1  -7  -2 7967.98 1905.70   1
   1  -7  -2 5375.78 1852.82   1
  -1   7   1 7317.32 1848.99   1
  -1   7   1 7661.79 1796.80   1
   1  -7  -1 6816.28 1752.61   1
   1  -7  -1 7780.09 2024.70   1
  -1   7   0  28330. 2208.77   1
  -1   7   0  32112. 2257.48   1
   1  -7   0  30233. 2204.24   1
   1  -7   0  30748. 2341.33   1
  -1   7  -1 1000.00 1587.33   1
  -1   7  -1 -1905.0 1785.31   1
   1  -7   1 -2409.2 1709.46   1
   1  -7   1  493.04 1766.87   1
  -1   7  -2  26409. 2140.22   1
  -1   7  -2  28726. 2421.01   1
   1  -7   2  28452. 2093.94   1
   1  -7   2  24662. 2179.19   1
  -1   7  -3  162.98 1858.38   1
  -1   7  -3  389.00 1641.96   1
   1  -7   3 2513.92 1745.30   1
   1  -7   3 -2677.1 1676.41   1
  -1   7  -4  31573. 2224.08   1
  -1   7  -4  27488. 2363.25   1
   1  -7   4  27968. 2255.04   1
   1  -7   4  30898. 2373.69   1
  -1   7  -5  20992. 2155.18   1
  -1   7  -5  19819. 1890.74   1
   1  -7   5  18215. 1964.16   1
   1  -7   5  22112. 2042.80   1
  -1   7  -6  49026. 2873.69   1
  -1   7  -6  43980. 2580.72   1
   1  -7   6  45024. 2579.33   1
   1  -7   6  45407. 2513.57   1
  -1   7  -7  21715. 2303.41   1
  -1   7  -7  21580. 2059.84   1
   1  -7   7  21013. 2067.85   1
   1  -7   7  23156. 2121.78   1
  -1   7  -8  24475. 2243.21   1
  -1   7  -8  24548. 1995.47   1
   1  -7   8  28824. 2107.86   1
   1  -7   8  26253. 2051.84   1
  -1   7  -9  48713. 2804.45   1
  -1   7  -9  50139. 2733.47   1
   1  -7   9  52088. 2884.13   1
   1  -7   9  48991. 2708.77   1
  -1   7 -10 2512.87 1508.35   1
  -1   7 -10 -2304.1 1775.57   1
   1  -7  10  386.57 1319.41   1
   1  -7  10 -296.49 1696.24   1
  -1   7 -11 154836. 5953.37   1
  -1   7 -11 163744. 6412.66   1
   1  -7  11 151740. 5890.74   1
   1  -7  11 158629. 6162.14   1
  -1   7 -12  22307. 2348.99   1
  -1   7 -12  21176. 2017.40   1
   1  -7  12  21917. 2093.94   1
   1  -7  12  18980. 2126.30   1
  -1   7 -13  43563. 2349.68   1
  -1   7 -13  42484. 2830.55   1
   1  -7  13  39666. 2532.70   1
   1  -7  13  41371. 2679.89   1
  -1   7 -14  715.38 2021.57   1
  -1   7 -14  250.80 1893.87   1
   1  -7  14 2005.22 1942.93   1
   1  -7  14  834.38 2099.16   1
  -1   7 -15  11948. 2599.16   1
  -1   7 -15 7021.57 1842.38   1
   1  -7  15  11023. 2417.19   1
   1  -7  15 7310.36 2340.64   1
  -1   7 -16 4770.35 2574.46   1
  -1   7 -16 7800.97 2230.69   1
   1  -7  16 -814.20 2383.44   1
   1  -7  16 5327.07 2389.35   1
  -1   7 -17 2559.84 2155.88   1
  -1   7 -17 3149.27 1723.73   1
   1  -7  17  751.22 1800.97   1
   1  -7  17 4676.40 1863.95   1
  -1   7 -18  59325. 3810.02   1
  -1   7 -18  52505. 3262.35   1
   1  -7  18  51566. 3401.18   1
   1  -7  18  63257. 3740.43   1
  -1   7 -19 3023.31 2543.14   1
  -1   7 -19   59.32 2338.55   1
   1  -7  19 6899.78 2799.23   1
   1  -7  19 2332.98 2197.63   1
  -1   7 -20  20501. 2780.44   1
  -1   7 -20  24910. 2893.53   1
   1  -7  20  22283. 2928.32   1
   1  -7  20  25240. 2604.38   1
  -1   7 -21 -1262.4 2864.99   1
  -1   7 -21 2842.73 2959.29   1
   1  -7  21 1094.99 2802.71   1
   1  -7  21 6332.63 2803.41   1
  -1   7 -22 1061.24 2884.83   1
  -1   7 -22 -1087.7 2852.12   1
   1  -7  22 2944.33 2779.05   1
   1  -7  22 1249.48 2832.63   1
  -1   7 -23  585.25 2843.07   1
  -1   7 -23 1641.26 3044.53   1
   1  -7  23 2818.72 2774.88   1
   1  -7  23  509.74 2788.79   1
  -1   7 -24  10386. 2786.71   1
  -1   7 -24 1282.88 2830.90   1
   1  -7  24 6729.29 2086.98   1
   1  -7  24  11054. 2360.82   1
  -1   7 -25  966.60 2907.79   1
  -1   7 -25 1208.42 2397.35   1
   1  -7  25 -340.47 2231.03   1
   1  -7  25 2227.90 2398.05   1
  -1   7 -26  18907. 3227.21   1
  -1   7 -26  11521. 3165.27   1
   1  -7  26  11524. 3103.69   1
   1  -7  26  15821. 3202.50   1
  -1   6  24 2260.26 3167.01   1
  -1   6  24  771.75 2627.35   1
   1  -6 -24  293.35 2997.21   1
   1  -6 -24 -4290.2 3264.78   1
  -1   6  23 -3004.2 2684.41   1
  -1   6  23 -2584.5 2487.12   1
   1  -6 -23 -2043.1 2728.25   1
   1  -6 -23 -253.37 3094.64   1
  -1   6  22 -893.18 2755.39   1
  -1   6  22 2694.85 2644.40   1
   1  -6 -22 -1835.8 2179.54   1
   1  -6 -22 1937.72 3117.95   1
  -1   6  21 -4349.3 2971.12   1
  -1   6  21 -212.14 2369.17   1
   1  -6 -21 -809.32 2602.29   1
   1  -6 -21 4725.12 2809.67   1
  -1   6  20 4916.49 2613.43   1
  -1   6  20  807.24 2859.77   1
   1  -6 -20 6113.42 2879.26   1
   1  -6 -20 7150.31 2802.71   1
  -1   6  19 -3576.9 2544.88   1
  -1   6  19 -3569.9 2617.60   1
   1  -6 -19 -1696.9 3103.34   1
   1  -6 -19 1281.49 2585.94   1
  -1   6  18 1882.74 2403.62   1
  -1   6  18 5264.44 2598.12   1
   1  -6 -18 7265.13 2511.48   1
   1  -6 -18  315.55 2981.21   1
  -1   6  17  12978. 2627.35   1
  -1   6  17  14308. 2485.04   1
   1  -6 -17  10609. 2518.79   1
   1  -6 -17 9300.62 2677.45   1
  -1   6  16 3030.27 2657.27   1
  -1   6  16 8653.44 2188.24   1
   1  -6 -16 4328.46 2338.20   1
   1  -6 -16 5622.82 2806.89   1
  -1   6  15 3339.59 3024.70   1
  -1   6  15 2161.10 2370.56   1
   1  -6 -15 -6844.1 2553.58   1
   1  -6 -15 -190.40 2861.17   1
  -1   6  14  26966. 2483.99   1
  -1   6  14  24572. 3334.37   1
   1  -6 -14  20696. 2788.79   1
   1  -6 -14  27321. 2930.41   1
  -1   6  13 8604.72 2093.60   1
  -1   6  13 7247.73 1980.17   1
   1  -6 -13 8295.05 1868.47   1
   1  -6 -13 6541.40 2367.43   1
  -1   6  12  260.44 2368.13   1
  -1   6  12  334.06 1903.62   1
   1  -6 -12 4318.02 2279.75   1
   1  -6 -12 -4526.8 2330.90   1
  -1   6  11  687.54 1837.51   1
  -1   6  11   22.47 1600.56   1
   1  -6 -11 -549.06 1598.12   1
   1  -6 -11  856.65 2118.30   1
  -1   6  10 1108.21 1930.41   1
  -1   6  10 5695.89 1835.42   1
   1  -6 -10  642.31 2020.53   1
   1  -6 -10  894.92 1962.07   1
  -1   6   9 -405.01 2085.94   1
  -1   6   9  651.70 1591.16   1
   1  -6  -9  605.08 2003.83   1
   1  -6  -9 1342.38 1998.95   1
  -1   6   8  65484. 3438.41   1
  -1   6   8  63674. 3060.54   1
   1  -6  -8  68824. 3390.74   1
   1  -6  -8  72825. 3573.41   1
  -1   6   7  35108. 2742.52   1
  -1   6   7  33076. 2301.32   1
   1  -6  -7  36326. 2511.83   1
   1  -6  -7  34457. 2434.58   1
  -1   6   6 4116.21 1832.64   1
  -1   6   6  10602. 1944.33   1
   1  -6  -6 4739.04 1416.84   1
   1  -6  -6 2292.62 1874.74   1
  -1   6   5  30063. 2299.58   1
  -1   6   5  29642. 2383.44   1
   1  -6  -5  31962. 2144.40   1
   1  -6  -5  30320. 2341.33   1
  -1   6   4  68998. 3297.14   1
  -1   6   4  69833. 3569.93   1
   1  -6  -4  78218. 3556.02   1
   1  -6  -4  72964. 3438.06   1
  -1   6   3 -2173.6 2066.46   1
  -1   6   3  665.62 1665.97   1
   1  -6  -3 -150.00 1756.78   1
   1  -6  -3 1359.08 1824.28   1
  -1   6   2  72721. 3382.04   1
  -1   6   2  73591. 3597.77   1
   1  -6  -2  79401. 3656.92   1
   1  -6  -2  76653. 3556.02   1
  -1   6   1  49861. 2862.56   1
  -1   6   1  47495. 2638.48   1
   1  -6  -1  44189. 2717.81   1
   1  -6  -1  48365. 2745.30   1
  -1   6   0 2125.61 1789.49   1
  -1   6   0 3521.22 1845.86   1
   1  -6   0  913.71 1754.35   1
   1  -6   0 2415.10 1899.09   1
  -1   6  -1 9081.41 1864.99   1
  -1   6  -1  10971. 1697.98   1
   1  -6   1  11447. 1840.29   1
   1  -6   1 9530.26 1946.76   1
  -1   6  -2  76340. 3531.66   1
  -1   6  -2  71260. 3297.84   1
   1  -6   2  73660. 3390.05   1
   1  -6   2  67432. 3264.78   1
  -1   6  -3  42519. 2647.18   1
  -1   6  -3  39909. 2240.43   1
   1  -6   3  41406. 2497.91   1
   1  -6   3  41823. 2594.29   1
  -1   6  -4  37474. 2320.46   1
  -1   6  -4  43076. 2695.89   1
   1  -6   4  39005. 2424.49   1
   1  -6   4  36813. 2500.35   1
  -1   6  -5  64649. 3044.88   1
  -1   6  -5  58907. 3105.77   1
   1  -6   5  58768. 2942.24   1
   1  -6   5  61378. 2982.95   1
  -1   6  -6  11260. 1842.38   1
  -1   6  -6  15379. 1986.43   1
   1  -6   6  11124. 1717.47   1
   1  -6   6  16399. 2056.02   1
  -1   6  -7  23208. 2033.40   1
  -1   6  -7  26006. 2116.91   1
   1  -6   7  24144. 1976.69   1
   1  -6   7  25682. 1987.12   1
  -1   6  -8  46451. 2784.62   1
  -1   6  -8  49443. 2630.83   1
   1  -6   8  47390. 2631.52   1
   1  -6   8  49200. 2567.15   1
  -1   6  -9 -1247.7 1816.28   1
  -1   6  -9  517.74 1748.43   1
   1  -6   9  409.88 1805.84   1
   1  -6   9 2002.78 1662.49   1
  -1   6 -10  20842. 2141.61   1
  -1   6 -10  21969. 1697.98   1
   1  -6  10  20877. 2067.50   1
   1  -6  10  23180. 2070.63   1
  -1   6 -11 -122.09 1890.05   1
  -1   6 -11 1853.51 1895.27   1
   1  -6  11   -4.24 2074.46   1
   1  -6  11 -648.57 1707.72   1
  -1   6 -12  56159. 2959.64   1
  -1   6 -12  57411. 3040.71   1
   1  -6  12  55567. 3239.38   1
   1  -6  12  54349. 2825.33   1
  -1   6 -13 9923.44 1661.45   1
  -1   6 -13 5977.73 2038.62   1
   1  -6  13  10090. 2118.30   1
   1  -6  13 9105.77 1959.29   1
  -1   6 -14  10393. 1690.67   1
  -1   6 -14  11955. 2280.79   1
   1  -6  14  14628. 1972.86   1
   1  -6  14 8002.78 1988.52   1
  -1   6 -15 4537.23 2112.73   1
  -1   6 -15 2596.38 2035.84   1
   1  -6  15  -69.52 1884.48   1
   1  -6  15 5365.34 2227.21   1
  -1   6 -16 1867.08 2133.96   1
  -1   6 -16 2965.90 2014.96   1
   1  -6  16 2160.75 1987.82   1
   1  -6  16 1303.06 2082.46   1
  -1   6 -17 -604.73 1678.50   1
   1  -6  17 -202.09 2509.04   1
   1  -6  17 -1796.1 1850.73   1
  -1   6 -18 9064.01 1840.99   1
   1  -6  18 2938.76 2415.10   1
   1  -6  18 5556.71 2552.89   1
  -1   6 -19  10731. 2483.30   1
  -1   6 -19 6203.89 1775.22   1
   1  -6  19 4133.61 2385.52   1
   1  -6  19 5640.22 2324.98   1
  -1   6 -20 -3636.0 2439.80   1
  -1   6 -20 1586.29 2115.86   1
   1  -6  20 2978.08 2474.95   1
   1  -6  20 3466.25 2133.26   1
  -1   6 -21 1447.81 2432.84   1
  -1   6 -21 3331.24 2141.96   1
   1  -6  21 -109.57 2175.36   1
   1  -6  21 1981.21 2251.22   1
  -1   6 -22 7150.31 1904.31   1
  -1   6 -22 8862.20 2297.84   1
   1  -6  22 2645.79 1988.52   1
   1  -6  22 4140.57 2637.44   1
  -1   6 -23 6322.19 1847.60   1
  -1   6 -23 8472.50 2891.79   1
   1  -6  23 4787.75 2502.43   1
   1  -6  23 4944.32 2877.17   1
  -1   6 -24 -4850.4 3351.77   1
   1  -6  24 -4116.2 3115.86   1
   1  -6  24 -1826.0 3074.11   1
  -1   6 -25 -1523.0 2685.45   1
  -1   6 -25 7672.23 3308.28   1
   1  -6  25 -342.62 2790.88   1
   1  -6  25 2985.73 3022.61   1
  -1   6 -26  13107. 3005.56   1
  -1   6 -26  15609. 2671.19   1
   1  -6  26  16159. 2904.31   1
   1  -6  26  19214. 2641.96   1
  -1   5  25 9502.43 2393.53   1
  -1   5  25  14732. 2604.38   1
   1  -5 -25 9262.34 2223.73   1
   1  -5 -25 9467.63 3429.36   1
  -1   5  24  234.20 2865.69   1
  -1   5  24 -719.90 2664.23   1
   1  -5 -24  -94.89 3237.30   1
   1  -5 -24 -4356.3 3163.53   1
  -1   5  23 4231.03 2410.58   1
  -1   5  23 6437.02 2625.26   1
   1  -5 -23  10431. 2856.29   1
   1  -5 -23 4697.28 2894.22   1
  -1   5  22 8277.65 2735.21   1
  -1   5  22 2575.50 2741.82   1
   1  -5 -22 5796.79 2209.11   1
   1  -5 -22  10974. 3072.72   1
  -1   5  21  12669. 2936.32   1
   1  -5 -21  19252. 3110.30   1
   1  -5 -21  15035. 3259.91   1
  -1   5  20 3343.42 2101.25   1
  -1   5  20 3030.27 2425.89   1
   1  -5 -20 -483.65 2492.34   1
   1  -5 -20  277.84 2630.48   1
  -1   5  19 4366.73 2034.79   1
  -1   5  19 2805.15 2573.07   1
   1  -5 -19 1508.00 2605.08   1
   1  -5 -19 -1981.6 2006.96   1
  -1   5  18 5052.19 2581.07   1
  -1   5  18 7985.38 2573.76   1
   1  -5 -18 8723.03 2556.02   1
   1  -5 -18 7839.24 2892.48   1
  -1   5  17 5723.72 2767.57   1
  -1   5  17  514.96 2441.19   1
   1  -5 -17 3030.27 2624.21   1
   1  -5 -17 -4011.8 2759.22   1
  -1   5  16 5848.99 2407.79   1
  -1   5  16 7891.43 2898.74   1
   1  -5 -16 5866.38 2538.97   1
   1  -5 -16 4321.50 2618.30   1
  -1   5  15  25024. 3150.66   1
  -1   5  15  26423. 2221.29   1
   1  -5 -15  26138. 2743.21   1
   1  -5 -15  28546. 2416.84   1
  -1   5  14  13431. 2078.98   1
  -1   5  14 8288.09 2039.32   1
   1  -5 -14  10752. 1740.08   1
   1  -5 -14  13807. 2539.32   1
  -1   5  13 108803. 4547.66   1
  -1   5  13 103410. 4450.24   1
   1  -5 -13  97564. 4095.33   1
   1  -5 -13 109151. 4707.72   1
  -1   5  12 1534.10 1820.46   1
  -1   5  12 1462.07 2405.36   1
   1  -5 -12 1620.04 2286.36   1
   1  -5 -12 4659.01 2204.94   1
  -1   5  11  50313. 2774.88   1
  -1   5  11  53619. 2890.05   1
   1  -5 -11  46451. 3035.14   1
   1  -5 -11  48608. 2699.37   1
  -1   5  10 -1443.6 2189.28   1
  -1   5  10 -364.65 1814.54   1
   1  -5 -10 1520.53 1672.58   1
   1  -5 -10  804.11 2162.49   1
  -1   5   9 6670.14 2036.18   1
  -1   5   9 6419.62 1776.62   1
   1  -5  -9 6927.62 2108.56   1
   1  -5  -9 4787.75 2217.81   1
  -1   5   8 -628.74 1862.91   1
  -1   5   8 1114.47 2046.97   1
   1  -5  -8 1664.93 1563.32   1
   1  -5  -8 1909.88 2094.99   1
  -1   5   7 7272.09 2373.34   1
  -1   5   7 6416.14 1768.96   1
   1  -5  -7 4151.01 2220.94   1
   1  -5  -7 7581.76 2038.27   1
  -1   5   6 -1669.4 2190.67   1
  -1   5   6 -1002.1 1788.10   1
   1  -5  -6 -2434.2 1941.54   1
   1  -5  -6 -507.31 2021.92   1
  -1   5   5 2103.34 1756.78   1
  -1   5   5 4342.38 2215.03   1
   1  -5  -5 3639.52 1863.26   1
   1  -5  -5 4533.75 1907.79   1
  -1   5   4 -1820.5 1474.25   1
  -1   5   4 -2239.0 2170.49   1
   1  -5  -4 -437.72 1824.28   1
   1  -5  -4  801.67 1856.64   1
  -1   5   3 -2357.7 2149.96   1
  -1   5   3 1336.12 1751.91   1
   1  -5  -3 -531.31 1796.10   1
   1  -5  -3 1937.02 1860.12   1
  -1   5   2  13403. 2105.43   1
  -1   5   2  16347. 1938.76   1
   1  -5  -2  16768. 1954.42   1
   1  -5  -2  13793. 2037.92   1
  -1   5   1 157655. 6068.19   1
  -1   5   1 167258. 6356.99   1
   1  -5  -1 161691. 6169.10   1
   1  -5  -1 162665. 6283.92   1
  -1   5   0 256820. 9300.62   1
  -1   5   0 259394. 9415.44   1
   1  -5   0 256611. 9276.26   1
   1  -5   0 255880. 9398.04   1
  -1   5  -1 1288.45 1798.54   1
  -1   5  -1 2925.54 1599.51   1
   1  -5   1 1124.91 1699.02   1
   1  -5   1  633.26 1827.07   1
  -1   5  -2 297773.  10755.   1
  -1   5  -2 327418.  11677.   1
   1  -5   2 305532.  10943.   1
   1  -5   2 317397.  11416.   1
  -1   5  -3 2490.26 1685.45   1
  -1   5  -3 3792.62 1873.35   1
   1  -5   3 -1114.8 1618.30   1
   1  -5   3 -2415.8 1825.68   1
  -1   5  -4  39457. 2407.44   1
  -1   5  -4  33713. 2417.19   1
   1  -5   4  35943. 2215.38   1
   1  -5   4  38587. 2597.07   1
  -1   5  -5 105463. 4408.49   1
  -1   5  -5 104488. 4265.83   1
   1  -5   5 106750. 4356.29   1
   1  -5   5 101740. 4102.29   1
  -1   5  -6  30779. 2239.04   1
  -1   5  -6  26677. 1943.63   1
   1  -5   6  30825. 1960.68   1
   1  -5   6  27366. 2100.55   1
  -1   5  -7  25372. 2214.68   1
  -1   5  -7  28333. 2210.16   1
   1  -5   7  27693. 2101.95   1
  -1   5  -8 105706. 4359.77   1
  -1   5  -8 108559. 4533.75   1
   1  -5   8 108942. 4509.39   1
   1  -5   8 116527. 4693.80   1
  -1   5  -9 3590.81 1951.29   1
  -1   5  -9  930.06 1881.00   1
   1  -5   9 4933.89 2073.07   1
   1  -5   9  944.68 1721.29   1
  -1   5 -10  12905. 2075.85   1
  -1   5 -10  16120. 1954.07   1
   1  -5  10  16058. 2056.02   1
   1  -5  10  18636. 2022.96   1
  -1   5 -11 4119.69 1875.78   1
  -1   5 -11 3043.14 1442.24   1
   1  -5  11 5024.35 2153.79   1
   1  -5  11  941.54 1637.44   1
  -1   5 -12  405.01 1759.91   1
  -1   5 -12  237.54 1669.45   1
   1  -5  12 1883.44 2108.56   1
   1  -5  12 -1840.3 1846.55   1
  -1   5 -13  52296. 2586.64   1
  -1   5 -13  45964. 2655.53   1
   1  -5  13  46694. 2791.92   1
   1  -5  13  48051. 2604.03   1
  -1   5 -14 -1290.5 1892.13   1
  -1   5 -14 2428.32 1771.05   1
   1  -5  14 1359.43 2092.90   1
   1  -5  14  797.15 1915.10   1
  -1   5 -15  70703. 3154.14   1
  -1   5 -15  74739. 3336.81   1
   1  -5  15  70877. 3186.15   1
   1  -5  15  77349. 3656.92   1
  -1   5 -16 3143.70 1831.94   1
  -1   5 -16 -1387.3 1979.12   1
   1  -5  16  592.90 2065.41   1
   1  -5  16 -2885.5 2052.54   1
  -1   5 -17 5125.26 2359.43   1
  -1   5 -17 5243.56 1907.44   1
   1  -5  17 2418.23 2461.03   1
   1  -5  17 4498.95 2329.50   1
  -1   5 -18 3403.27 2623.87   1
  -1   5 -18 7689.62 2081.42   1
   1  -5  18 5441.89 2530.62   1
   1  -5  18 2837.85 2318.37   1
  -1   5 -19 -1850.7 2038.97   1
  -1   5 -19  649.62 2718.51   1
   1  -5  19 -8044.5 2652.40   1
   1  -5  19 -1866.0 2000.35   1
  -1   5 -20 7223.38 2141.26   1
  -1   5 -20 3806.54 2779.40   1
   1  -5  20 7052.88 2546.27   1
   1  -5  20 1565.06 2435.63   1
  -1   5 -21 9645.08 2255.74   1
  -1   5 -21 8973.55 2157.97   1
   1  -5  21 8517.74 2632.57   1
   1  -5  21 8521.22 1939.80   1
  -1   5 -22 -1907.1 2275.92   1
  -1   5 -22 -176.79 2417.19   1
   1  -5  22 3890.05 2384.13   1
   1  -5  22  819.76 3006.26   1
  -1   5 -23 9432.84 3351.08   1
  -1   5 -23 5093.94 2562.28   1
   1  -5  23  116.74 2925.88   1
   1  -5  23 4331.94 3069.59   1
  -1   5 -24  504.52 1789.14   1
  -1   5 -24 -3952.7 3121.08   1
   1  -5  24 3736.95 2817.67   1
   1  -5  24  985.73 2585.94   1
  -1   5 -25 1422.75 2418.23   1
  -1   5 -25  901.88 2747.74   1
   1  -5  25 -5539.3 2324.28   1
   1  -5  25  697.29 2996.87   1
  -1   5 -26 -2460.3 3371.95   1
  -1   5 -26 8312.45 2489.56   1
   1  -5  26  10362. 3542.10   1
   1  -5  26 5984.68 2784.62   1
  -1   5 -27 3674.32 2985.38   1
  -1   5 -27 1586.29 2476.69   1
   1  -5  27 -1547.7 2717.12   1
   1  -5  27  249.69 3342.38   1
  -1   4  25 -718.16 2633.26   1
  -1   4  25 -3684.8 2426.23   1
   1  -4 -25 5977.73 2690.32   1
   1  -4 -25 -286.60 2954.42   1
  -1   4  24 1748.78 2893.18   1
  -1   4  24 1985.04 2182.67   1
   1  -4 -24 -1573.4 2473.55   1
   1  -4 -24 -4787.7 3469.73   1
  -1   4  23 4095.33 2130.83   1
  -1   4  23 -1873.7 2757.83   1
   1  -4 -23 -2489.2 2157.27   1
   1  -4 -23 -2120.4 2988.51   1
  -1   4  22 2686.15 2823.59   1
  -1   4  22 4509.39 2164.92   1
   1  -4 -22 -485.39 2851.77   1
   1  -4 -22 4011.83 2144.40   1
  -1   4  21 4498.95 2763.74   1
  -1   4  21 3643.00 1961.03   1
   1  -4 -21 6036.88 2003.83   1
   1  -4 -21 6370.91 2929.36   1
  -1   4  20  16023. 2750.87   1
  -1   4  20  12971. 2283.92   1
   1  -4 -20 8743.90 2679.54   1
   1  -4 -20 9342.37 2560.89   1
  -1   4  19 -927.97 2679.54   1
  -1   4  19 1062.63 2566.80   1
   1  -4 -19 2624.91 2848.29   1
   1  -4 -19 3198.67 2829.16   1
  -1   4  18  10056. 2614.47   1
  -1   4  18 9147.52 2006.61   1
   1  -4 -18  14061. 2199.02   1
   1  -4 -18 9050.10 2926.93   1
  -1   4  17 2578.29 2332.98   1
  -1   4  17 -5184.4 2360.82   1
   1  -4 -17 -3820.5 1879.61   1
   1  -4 -17 1342.73 2784.97   1
  -1   4  16  20863. 2821.50   1
  -1   4  16  22255. 2472.86   1
   1  -4 -16  25543. 2857.34   1
   1  -4 -16  24154. 2758.52   1
  -1   4  15 7800.97 2482.25   1
  -1   4  15 4777.31 1970.77   1
   1  -4 -15 3921.36 2245.30   1
   1  -4 -15 1320.11 2283.92   1
  -1   4  14  14534. 2537.58   1
  -1   4  14  12860. 2084.20   1
   1  -4 -14  17843. 2264.09   1
   1  -4 -14  16395. 2426.93   1
  -1   4  13  304.28 1829.50   1
  -1   4  13 3058.45 2172.93   1
   1  -4 -13 2978.08 1859.08   1
   1  -4 -13 -1988.9 2082.46   1
  -1   4  12 3068.19 1744.26   1
  -1   4  12 -785.66 1686.15   1
   1  -4 -12 2393.18 1534.79   1
   1  -4 -12 5904.66 2072.72   1
  -1   4  11 -4279.7 2956.16   1
  -1   4  11 4398.05 1559.15   1
   1  -4 -11 2465.20 2497.56   1
   1  -4 -11  195.58 1872.30   1
  -1   4  10 1464.51 1696.94   1
  -1   4  10 4380.65 1781.84   1
   1  -4 -10 3292.97 1743.21   1
   1  -4 -10 5466.24 1954.07   1
  -1   4   9 4436.32 1616.56   1
  -1   4   9 -620.04 1737.30   1
   1  -4  -9 2858.73 1816.28   1
   1  -4  -9 -725.47 1822.20   1
  -1   4   8  16148. 2263.39   1
  -1   4   8  18420. 2095.68   1
   1  -4  -8  16371. 2420.67   1
   1  -4  -8  19141. 2374.39   1
  -1   4   7 147982. 6047.31   1
  -1   4   7 142484. 5598.46   1
   1  -4  -7 161378. 6492.69   1
   1  -4  -7 136639. 5574.11   1
  -1   4   6 1948.15 2320.80   1
  -1   4   6   -8.26 1757.48   1
   1  -4  -6 -4064.0 2164.58   1
   1  -4  -6 -960.33 2093.60   1
  -1   4   5  43772. 2604.73   1
  -1   4   5  42241. 2585.59   1
   1  -4  -5  49026. 2703.89   1
   1  -4  -5  39909. 2753.65   1
  -1   4   4  31263. 2479.12   1
  -1   4   4  29951. 2276.27   1
   1  -4  -4  30741. 2279.40   1
   1  -4  -4  34628. 2578.29   1
  -1   4   3 4798.19 2116.56   1
  -1   4   3 9067.49 1875.78   1
   1  -4  -3 8580.37 1684.76   1
   1  -4  -3 7439.10 1954.07   1
  -1   4   2 368476.  13104.   1
  -1   4   2 372651.  13278.   1
   1  -4  -2 376826.  13379.   1
   1  -4  -2 382394.  13587.   1
  -1   4   1  71607. 3266.18   1
  -1   4   1  75017. 3429.02   1
   1  -4  -1  73452. 3376.13   1
   1  -4  -1  77418. 3636.04   1
  -1   4   0  15825. 1962.07   1
  -1   4   0  15000. 1943.28   1
   1  -4   0  15661. 2045.23   1
   1  -4   0  14259. 1682.67   1
  -1   4  -1  14471. 2107.51   1
  -1   4  -1  13803. 1796.45   1
   1  -4   1  15077. 1800.62   1
   1  -4   1  16771. 2135.35   1
  -1   4  -2  36917. 2368.82   1
  -1   4  -2  32905. 2285.31   1
   1  -4   2  39388. 2334.03   1
   1  -4   2  41162. 2519.83   1
  -1   4  -3  98399. 4084.90   1
  -1   4  -3  92623. 3980.51   1
   1  -4   3  94328. 3956.15   1
   1  -4   3  94885. 4067.50   1
  -1   4  -4  22140. 2109.25   1
  -1   4  -4  25491. 2106.12   1
   1  -4   4  24433. 1933.19   1
   1  -4   4  27926. 2320.46   1
  -1   4  -5 -1138.1 1780.79   1
  -1   4  -5 -448.16 1782.18   1
   1  -4   5 -361.52 1901.88   1
   1  -4   5 -250.03 1624.91   1
  -1   4  -6 215136. 7891.43   1
  -1   4  -6 220146. 8148.91   1
   1  -4   6 223451. 8180.23   1
   1  -4   6 234551. 8569.93   1
  -1   4  -7 3282.88 1804.45   1
  -1   4  -7 4328.46 1657.27   1
   1  -4   7 3262.00 1974.25   1
   1  -4   7 4224.07 1536.88   1
  -1   4  -8 103653. 4331.94   1
  -1   4  -8  94642. 3841.33   1
   1  -4   8  94224. 3977.03   1
   1  -4   8  95337. 3990.95   1
  -1   4  -9 4084.90 1956.85   1
  -1   4  -9 3496.87 1652.40   1
   1  -4   9 2914.05 1890.39   1
   1  -4   9 3393.52 1655.18   1
  -1   4 -10  33796. 2026.09   1
  -1   4 -10  28459. 1873.00   1
   1  -4  10  33483. 2451.28   1
   1  -4  10  31246. 2129.78   1
  -1   4 -11  41997. 2593.60   1
  -1   4 -11  33013. 2237.65   1
   1  -4  11  38413. 2530.62   1
   1  -4  11  39283. 2564.72   1
  -1   4 -12  29283. 1951.63   1
  -1   4 -12  27742. 2274.18   1
   1  -4  12  27564. 2030.27   1
   1  -4  12  25007. 2157.62   1
  -1   4 -13 5852.46 1962.07   1
  -1   4 -13 3928.32 1784.27   1
   1  -4  13 4022.26 2089.07   1
   1  -4  13 1346.90 1628.04   1
  -1   4 -14  75818. 3450.94   1
  -1   4 -14  75122. 3443.28   1
   1  -4  14  76374. 3573.41   1
   1  -4  14  81072. 3719.55   1
  -1   4 -15  -67.85 1703.20   1
  -1   4 -15 -376.48 1689.28   1
   1  -4  15 1521.57 1456.85   1
   1  -4  15 -830.20 1646.83   1
  -1   4 -16 3799.58 1866.04   1
  -1   4 -16 2881.00 1889.35   1
   1  -4  16 3323.24 1902.92   1
   1  -4  16 1496.52 1832.64   1
  -1   4 -17  11423. 2224.42   1
  -1   4 -17  12345. 2369.17   1
   1  -4  17  11235. 2040.71   1
   1  -4  17 9231.03 2301.67   1
  -1   4 -18  863.60 1931.10   1
  -1   4 -18 -2765.5 2368.82   1
   1  -4  18  374.04 1727.90   1
   1  -4  18  696.94 2250.17   1
  -1   4 -19 3218.51 2430.76   1
  -1   4 -19 2919.97 2591.16   1
   1  -4  19 5424.49 2374.04   1
   1  -4  19 -3778.7 2299.93   1
  -1   4 -20 5361.86 3025.05   1
  -1   4 -20 1905.70 2050.10   1
   1  -4  20 4714.68 2725.81   1
   1  -4  20 2403.27 2105.08   1
  -1   4 -21 1085.25 3002.08   1
  -1   4 -21  318.44 2397.01   1
   1  -4  21 -2568.9 2489.91   1
   1  -4  21 -2527.1 2444.33   1
  -1   4 -22 4780.79 2268.27   1
  -1   4 -22 -1622.8 2502.78   1
   1  -4  22 1060.89 2042.45   1
   1  -4  22 2492.69 2703.20   1
  -1   4 -23 2931.45 2450.94   1
   1  -4  23 3597.77 3142.66   1
   1  -4  23  490.60 2406.05   1
  -1   4 -24 2178.49 2307.58   1
  -1   4 -24 -1748.4 2554.63   1
   1  -4  24 4599.86 2734.17   1
   1  -4  24 -2127.7 2421.01   1
  -1   4 -25 -367.78 3339.59   1
  -1   4 -25 4342.38 2358.04   1
   1  -4  25 -3258.9 3297.14   1
   1  -4  25 -1761.7 2784.62   1
  -1   4 -26 3469.03 2340.29   1
  -1   4 -26 4766.87 2845.51   1
   1  -4  26  426.58 2448.50   1
   1  -4  26 4328.46 2495.82   1
  -1   4 -27  12154. 2755.39   1
  -1   4 -27 1286.71 3093.25   1
   1  -4  27 4464.16 3677.80   1
   1  -4  27 7310.36 3120.04   1
  -1   3  26 2709.81 2688.58   1
  -1   3  26 3422.75 2357.34   1
   1  -3 -26 9655.52 2830.90   1
   1  -3 -26 2649.61 3022.96   1
  -1   3  25 3924.84 2861.51   1
  -1   3  25 -3733.5 2671.88   1
   1  -3 -25 -1264.8 3090.81   1
   1  -3 -25 5149.61 3062.98   1
  -1   3  24 9711.19 2991.65   1
  -1   3  24  10793. 2147.18   1
   1  -3 -24  11124. 2695.54   1
   1  -3 -24  10762. 3178.49   1
  -1   3  23 4498.95 2522.27   1
  -1   3  23 5800.27 2860.47   1
   1  -3 -23 -1830.2 2856.64   1
   1  -3 -23 3764.78 2429.71   1
  -1   3  22  11009. 2390.05   1
  -1   3  22 9672.92 2821.15   1
   1  -3 -22 8079.32 2884.48   1
   1  -3 -22 9979.11 2220.60   1
  -1   3  21  16173. 2848.64   1
  -1   3  21  12693. 2873.00   1
   1  -3 -21  20964. 3036.53   1
   1  -3 -21  14443. 3006.96   1
  -1   3  20 6503.12 2506.26   1
  -1   3  20 4377.17 2331.59   1
   1  -3 -20 5692.41 2068.89   1
   1  -3 -20 7880.99 2821.15   1
  -1   3  19  22356. 2882.39   1
  -1   3  19  23546. 2942.24   1
   1  -3 -19  19544. 3060.19   1
   1  -3 -19  23389. 3137.44   1
  -1   3  18  46520. 2792.27   1
  -1   3  18  45337. 2962.42   1
   1  -3 -18  44398. 2878.56   1
   1  -3 -18  51635. 3556.02   1
  -1   3  17 5139.17 2580.03   1
  -1   3  17 1936.67 2229.99   1
   1  -3 -17 4387.61 2670.14   1
   1  -3 -17 3653.44 2495.82   1
  -1   3  16  984.69 2309.67   1
  -1   3  16 -722.69 2161.79   1
   1  -3 -16  466.94 2312.11   1
   1  -3 -16 4690.32 2498.26   1
  -1   3  15 3334.72 1958.59   1
  -1   3  15 -1633.6 1556.71   1
   1  -3 -15 -186.85 1865.34   1
   1  -3 -15 -2243.9 2200.07   1
  -1   3  14 -224.67 1876.13   1
  -1   3  14  293.95 1729.99   1
   1  -3 -14 -757.48 2107.17   1
   1  -3 -14  863.26 1784.27   1
  -1   3  13 5163.53 2168.06   1
  -1   3  13  621.43 1862.21   1
   1  -3 -13 1811.41 1811.76   1
   1  -3 -13 6036.88 2169.45   1
  -1   3  12  20532. 2443.63   1
  -1   3  12  22975. 2263.74   1
   1  -3 -12  23274. 2235.91   1
   1  -3 -12  26514. 2564.72   1
  -1   3  11  42902. 2572.72   1
  -1   3  11  43111. 2672.23   1
   1  -3 -11  45163. 2515.66   1
   1  -3 -11  43006. 2622.13   1
  -1   3  10  856.65 2598.12   1
  -1   3  10 1215.73 1965.20   1
   1  -3 -10 2759.91 2284.62   1
   1  -3 -10 -2392.1 2169.10   1
  -1   3   9  30337. 2340.99   1
  -1   3   9  30369. 2422.06   1
   1  -3  -9  32801. 2323.59   1
   1  -3  -9  34969. 2765.83   1
  -1   3   8  59186. 3080.37   1
  -1   3   8  56159. 3009.74   1
   1  -3  -8  54662. 2938.06   1
   1  -3  -8  61169. 3380.65   1
  -1   3   7  11440. 2031.66   1
  -1   3   7  10317. 2531.66   1
   1  -3  -7 8201.11 2476.69   1
   1  -3  -7  12143. 2376.48   1
  -1   3   6 -616.56 2052.54   1
  -1   3   6 1520.18 1831.59   1
   1  -3  -6 -2639.2 2176.76   1
   1  -3  -6  604.04 2192.06   1
  -1   3   5 1585.25 2240.08   1
  -1   3   5 1233.47 1856.64   1
   1  -3  -5 1640.92 2181.97   1
   1  -3  -5 1593.60 2190.32   1
  -1   3   4  74426. 3486.43   1
  -1   3   4  74913. 3432.84   1
   1  -3  -4  78601. 3322.20   1
   1  -3  -4  70842. 3521.22   1
  -1   3   3  15470. 1671.54   1
  -1   3   3  14805. 2183.02   1
   1  -3  -3  15007. 1879.96   1
   1  -3  -3  10807. 2083.51   1
  -1   3   2  55741. 2881.00   1
  -1   3   2  54175. 2736.95   1
   1  -3  -2  57724. 2819.41   1
   1  -3  -2  57516. 2887.61   1
  -1   3   1 4324.98 1747.04   1
  -1   3   1 4391.09 1639.87   1
   1  -3  -1 5939.45 1509.39   1
   1  -3  -1 6624.91 1753.65   1
  -1   3   0  57620. 2684.41   1
  -1   3   0  55045. 2662.14   1
   1  -3   0  58559. 2639.18   1
   1  -3   0  59603. 2819.06   1
  -1   3  -1  28984. 1885.18   1
  -1   3  -1  28072. 1903.62   1
   1  -3   1  28573. 1849.34   1
   1  -3   1  24022. 1964.16   1
  -1   3  -2 2615.86 1598.47   1
  -1   3  -2  841.34 1621.08   1
   1  -3   2 -635.70 1644.40   1
   1  -3   2 1343.42 1359.78   1
  -1   3  -3  36326. 2153.79   1
  -1   3  -3  39631. 2248.43   1
   1  -3   3  40605. 2221.29   1
   1  -3   3  38344. 2403.96   1
  -1   3  -4  23754. 2001.39   1
  -1   3  -4  25560. 2044.19   1
   1  -3   4  27564. 2109.95   1
   1  -3   4  26990. 1985.38   1
  -1   3  -5 2648.92 1854.21   1
  -1   3  -5 3334.03 1575.16   1
   1  -3   5 -770.01 2124.22   1
   1  -3   5  746.69 1536.53   1
  -1   3  -6  38518. 2266.53   1
  -1   3  -6  36186. 2358.04   1
   1  -3   6  37857. 2223.03   1
   1  -3   6  38518. 2410.58   1
  -1   3  -7  31778. 2425.19   1
  -1   3  -7  29899. 2348.99   1
   1  -3   7  34081. 2643.00   1
   1  -3   7  31618. 2368.82   1
  -1   3  -8  47042. 2536.88   1
  -1   3  -8  50209. 2808.63   1
   1  -3   8  48225. 3037.58   1
   1  -3   8  43076. 2422.75   1
  -1   3  -9  96903. 4126.65   1
  -1   3  -9  95685. 4018.79   1
   1  -3   9  97112. 4074.46   1
   1  -3   9  94850. 4060.54   1
  -1   3 -10 9394.56 1838.55   1
  -1   3 -10 6753.65 1424.15   1
   1  -3  10 6398.74 1625.61   1
   1  -3  10 7063.32 1627.00   1
  -1   3 -11  36500. 2380.65   1
  -1   3 -11  36360. 2108.91   1
   1  -3  11  36987. 2521.92   1
   1  -3  11  37056. 2287.75   1
  -1   3 -12 242310. 8921.36   1
  -1   3 -12 237091. 8723.03   1
   1  -3  12 245268. 9064.01   1
   1  -3  12 248434. 9133.60   1
  -1   3 -13  85317. 3677.80   1
  -1   3 -13  83716. 3865.69   1
   1  -3  13  87474. 4018.79   1
   1  -3  13  82150. 3604.73   1
  -1   3 -14 6986.77 2097.08   1
  -1   3 -14 5908.14 1814.19   1
   1  -3  14 2856.64 2064.02   1
   1  -3  14 8496.86 1850.38   1
  -1   3 -15 -1954.4 2075.50   1
  -1   3 -15 -561.59 1799.58   1
   1  -3  15 -3096.0 1943.28   1
   1  -3  15 1664.23 1807.58   1
  -1   3 -16  731.73 1784.62   1
  -1   3 -16 -3307.6 2282.53   1
   1  -3  16 1725.12 2002.43   1
   1  -3  16  237.96 1770.01   1
  -1   3 -17  -71.33 1660.05   1
  -1   3 -17  749.48 2514.26   1
   1  -3  17 1141.61 2221.99   1
   1  -3  17 -1441.9 1685.45   1
  -1   3 -18  25414. 2487.82   1
  -1   3 -18  21068. 2301.67   1
   1  -3  18  20184. 2397.35   1
   1  -3  18  27825. 2260.61   1
  -1   3 -19  19836. 3249.82   1
  -1   3 -19  21604. 2716.07   1
   1  -3  19  24398. 3013.92   1
   1  -3  19  17735. 2584.90   1
  -1   3 -20 1263.39 2659.71   1
  -1   3 -20 3135.35 2111.34   1
   1  -3  20 1734.51 1999.65   1
   1  -3  20 2486.08 2157.27   1
  -1   3 -21 6315.23 2715.03   1
  -1   3 -21  12818. 3127.00   1
   1  -3  21 7303.40 2839.59   1
   1  -3  21 9029.22 2670.14   1
  -1   3 -22  17561. 2992.69   1
  -1   3 -22  17227. 2068.20   1
   1  -3  22  18466. 2946.76   1
   1  -3  22  14628. 2361.17   1
  -1   3 -23 2215.73 2987.82   1
  -1   3 -23   38.76 2626.30   1
   1  -3  23 2012.87 2994.43   1
   1  -3  23 3677.80 2633.26   1
  -1   3 -24 -405.36 2485.73   1
  -1   3 -24 3078.63 2246.34   1
   1  -3  24 4885.17 2500.00   1
   1  -3  24 -3705.6 2636.04   1
  -1   3 -25 -678.84 2206.33   1
  -1   3 -25 -5024.4 3318.72   1
   1  -3  25 -945.02 3486.43   1
   1  -3  25 5511.48 2396.31   1
  -1   3 -26  861.86 2238.34   1
   1  -3  26  925.89 2584.20   1
   1  -3  26 -3563.0 2302.36   1
  -1   3 -27 -287.89 3145.44   1
  -1   3 -27  945.72 2709.81   1
   1  -3  27 -6781.5 3583.85   1
   1  -3  27 1608.21 2765.83   1
  -1   2  26 6029.92 2979.12   1
  -1   2  26 5755.04 2580.72   1
   1  -2 -26 6471.81 2216.07   1
   1  -2 -26 8500.34 2679.89   1
  -1   2  25 1449.89 1985.38   1
  -1   2  25 -5452.3 2186.85   1
   1  -2 -25 5988.16 2874.04   1
   1  -2 -25 -939.80 2688.24   1
  -1   2  24 1545.23 2931.10   1
  -1   2  24 3119.34 2432.50   1
   1  -2 -24 6461.37 3001.04   1
   1  -2 -24 2040.71 2892.13   1
  -1   2  23 3562.98 2568.89   1
  -1   2  23  975.99 2797.84   1
   1  -2 -23 -443.63 2467.99   1
   1  -2 -23 -2077.2 2806.19   1
  -1   2  22 1169.10 3337.16   1
  -1   2  22 4926.93 1906.05   1
   1  -2 -22 2213.29 2375.08   1
   1  -2 -22 8622.12 3207.03   1
  -1   2  21 -3597.8 2346.21   1
  -1   2  21 1641.26 2557.06   1
   1  -2 -21 1798.54 2775.57   1
   1  -2 -21 3082.11 2585.24   1
  -1   2  20  666.32 2465.55   1
  -1   2  20 -1066.5 2247.04   1
   1  -2 -20 -740.08 2660.40   1
   1  -2 -20 2559.15 2492.69   1
  -1   2  19 -1335.4 2327.42   1
  -1   2  19 2386.22 2641.26   1
   1  -2 -19 1737.30 2519.48   1
   1  -2 -19 4491.99 3037.23   1
  -1   2  18 9279.74 2630.83   1
  -1   2  18 8475.98 2450.94   1
   1  -2 -18  11548. 2837.85   1
   1  -2 -18 9151.00 2805.84   1
  -1   2  17 -169.69 2066.11   1
  -1   2  17 1792.62 1709.46   1
   1  -2 -17 1382.74 1852.47   1
   1  -2 -17 4878.21 2518.09   1
  -1   2  16 -1859.1 2165.97   1
  -1   2  16 -3980.5 2157.62   1
   1  -2 -16 -1621.8 2307.24   1
   1  -2 -16 1863.95 2281.83   1
  -1   2  15 2532.36 1485.73   1
  -1   2  15 2141.61 1965.20   1
   1  -2 -15 1048.71 1532.36   1
   1  -2 -15  -74.32 2199.02   1
  -1   2  14  16635. 2065.41   1
  -1   2  14  19777. 2341.68   1
   1  -2 -14  21336. 2373.69   1
   1  -2 -14  21141. 2305.50   1
  -1   2  13  91162. 4171.88   1
  -1   2  13  86848. 3886.57   1
   1  -2 -13  89909. 4008.35   1
   1  -2 -13  91614. 4265.83   1
  -1   2  12 8107.16 1946.76   1
  -1   2  12 9839.93 2304.45   1
   1  -2 -12 5299.23 2346.90   1
   1  -2 -12 6934.58 1612.39   1
  -1   2  11  -83.30 2155.18   1
  -1   2  11 3542.10 2217.81   1
   1  -2 -11 2914.75 1929.71   1
   1  -2 -11 2216.77 2307.93   1
  -1   2  10 9276.26 2282.53   1
  -1   2  10 9547.66 2355.25   1
   1  -2 -10  16764. 2093.60   1
   1  -2 -10 8622.12 2343.77   1
  -1   2   9  13337. 1775.22   1
  -1   2   9  13803. 2036.18   1
   1  -2  -9  14489. 1797.84   1
   1  -2  -9  13417. 2224.77   1
  -1   2   8  95024. 4592.90   1
  -1   2   8  83646. 3938.76   1
   1  -2  -8  96868. 4425.88   1
   1  -2  -8  98643. 4446.76   1
  -1   2   7 147599. 6130.82   1
  -1   2   7 145511. 5727.20   1
   1  -2  -7 151566. 6172.58   1
   1  -2  -7 148504. 5929.01   1
  -1   2   6 2613.08 2213.99   1
  -1   2   6 5532.35 2560.54   1
   1  -2  -6 -1039.0 2449.89   1
   1  -2  -6 3684.76 2361.51   1
  -1   2   5  27067. 2157.62   1
  -1   2   5  23069. 2560.19   1
   1  -2  -5  25132. 2604.73   1
   1  -2  -5  26959. 2419.97   1
  -1   2   4  78184. 3757.83   1
  -1   2   4  71468. 3307.23   1
   1  -2  -4  75609. 3646.48   1
   1  -2  -4  80063. 3886.57   1
  -1   2   3 1630.48 1443.28   1
  -1   2   3 3063.67 1617.26   1
   1  -2  -3 1905.70 1424.84   1
   1  -2  -3 3131.17 1908.84   1
  -1   2   2 3459.29 1483.99   1
  -1   2   2 4359.77 1406.40   1
   1  -2  -2 2927.28 1214.33   1
   1  -2  -2 3019.13 1546.62   1
  -1   2   1 269659. 9485.03   1
  -1   2   1 272547. 9572.02   1
   1  -2  -1 280863. 9843.41   1
   1  -2  -1 268371. 9457.19   1
  -1   2   0  33807. 1674.32   1
  -1   2   0  28594. 1640.22   1
   1  -2   0  32530. 1624.22   1
   1  -2   0  32084. 1696.94   1
  -1   2  -1 268197. 9398.04   1
  -1   2  -1 264996. 9286.70   1
   1  -2   1 256576. 8987.46   1
   1  -2   1 266666. 9380.65   1
  -1   2  -2 -360.82 1135.35   1
  -1   2  -2 1874.04 1103.69   1
   1  -2   2 1585.94 1053.23   1
   1  -2   2 -144.05 1282.53   1
  -1   2  -3 1050.80 1433.19   1
  -1   2  -3 1974.95 1347.25   1
   1  -2   3 2627.35 1386.22   1
   1  -2   3  604.73 1217.12   1
  -1   2  -4  53619. 2664.58   1
  -1   2  -4  54976. 2556.71   1
   1  -2   4  52366. 2490.95   1
   1  -2   4  52053. 2674.67   1
  -1   2  -5 8382.04 1934.58   1
  -1   2  -5 6116.90 1769.31   1
   1  -2   5 5521.92 1916.14   1
   1  -2   5 5153.09 1651.36   1
  -1   2  -6 4446.76 1915.80   1
  -1   2  -6 1867.08 1572.37   1
   1  -2   6 3956.15 2254.00   1
   1  -2   6 3254.00 1500.35   1
  -1   2  -7  17505. 2100.55   1
  -1   2  -7  22258. 2306.89   1
   1  -2   7  21820. 2573.07   1
   1  -2   7  20184. 2001.04   1
  -1   2  -8 2115.17 1804.10   1
  -1   2  -8 6437.02 1771.05   1
   1  -2   8 3118.65 2032.01   1
   1  -2   8 4599.86 1543.49   1
  -1   2  -9 9074.45 2094.99   1
  -1   2  -9 8159.35 1860.12   1
   1  -2   9  10731. 2353.86   1
   1  -2   9 6217.81 1706.33   1
  -1   2 -10  78323. 3712.59   1
  -1   2 -10  76653. 3493.39   1
   1  -2  10  76479. 3538.62   1
   1  -2  10  76235. 3629.08   1
  -1   2 -11  18413. 1796.10   1
  -1   2 -11  12710. 2216.07   1
   1  -2  11  19360. 2351.08   1
   1  -2  11  17784. 1687.19   1
  -1   2 -12  26242. 2489.21   1
  -1   2 -12  33354. 2376.82   1
   1  -2  12  36952. 2440.85   1
   1  -2  12  32787. 2536.88   1
  -1   2 -13 6642.30 2132.91   1
  -1   2 -13 2527.49 1803.06   1
   1  -2  13 1428.32 1942.93   1
   1  -2  13 5789.83 1497.21   1
  -1   2 -14  10212. 1737.65   1
  -1   2 -14 9972.16 1566.80   1
   1  -2  14 8729.98 1567.85   1
   1  -2  14  11799. 1882.74   1
  -1   2 -15 -882.05 1950.24   1
  -1   2 -15 1056.71 2296.10   1
   1  -2  15  680.24 2034.79   1
   1  -2  15 2484.34 1974.25   1
  -1   2 -16   32.81 2197.63   1
  -1   2 -16 1895.61 1988.52   1
   1  -2  16 5073.06 1509.74   1
   1  -2  16 -1242.2 1892.83   1
  -1   2 -17  17627. 2633.26   1
  -1   2 -17  11935. 2147.18   1
   1  -2  17  18577. 2410.92   1
   1  -2  17  18142. 2229.99   1
  -1   2 -18 4864.30 2450.94   1
  -1   2 -18 8980.51 2163.88   1
   1  -2  18 7623.51 1948.15   1
   1  -2  18 9648.56 2285.31   1
  -1   2 -19  53549. 3449.54   1
  -1   2 -19  50974. 3820.46   1
   1  -2  19  56054. 3792.62   1
   1  -2  19  49791. 3270.70   1
  -1   2 -20 1805.50 2148.57   1
  -1   2 -20 2258.87 1852.12   1
   1  -2  20 -154.35 2056.02   1
   1  -2  20 8089.76 2217.12   1
  -1   2 -21  18093. 3147.87   1
  -1   2 -21  22199. 2832.63   1
   1  -2  21  17898. 3203.20   1
   1  -2  21  18191. 2706.68   1
  -1   2 -22 -295.13 2858.03   1
  -1   2 -22 -2404.0 2582.46   1
   1  -2  22 -416.49 2964.85   1
   1  -2  22 -2346.6 2654.83   1
  -1   2 -23 -1934.2 2348.29   1
  -1   2 -23 -342.45 2481.56   1
   1  -2  23 -1505.6 2104.03   1
   1  -2  23 4982.60 2463.81   1
  -1   2 -24 -299.58 2991.99   1
  -1   2 -24 -724.43 1834.03   1
   1  -2  24  467.99 3154.14   1
   1  -2  24 3775.22 2288.10   1
  -1   2 -25  910.58 3067.15   1
  -1   2 -25 5800.27 2319.76   1
   1  -2  25 4645.09 3131.17   1
   1  -2  25 1765.83 2422.75   1
  -1   2 -26 1469.73 3057.06   1
  -1   2 -26  242.00 2135.00   1
   1  -2  26 -1120.7 2260.96   1
   1  -2  26 -2859.1 2608.56   1
  -1   2 -27 7703.54 2719.90   1
  -1   2 -27 4352.81 3118.30   1
   1  -2  27 6179.54 3340.98   1
   1  -2  27 4366.73 2626.65   1
  -1   1  27 1371.61 2366.04   1
  -1   1  27 -4213.6 2967.64   1
   1  -1 -27  567.85 3021.57   1
   1  -1 -27 -2571.0 2660.05   1
  -1   1  26 -2513.6 2748.43   1
  -1   1  26 1295.41 2716.42   1
   1  -1 -26 2697.63 3094.29   1
   1  -1 -26 2548.01 3001.04   1
  -1   1  25 1435.98 3128.04   1
  -1   1  25 -1169.1 2681.97   1
   1  -1 -25  620.74 3158.31   1
   1  -1 -25 3241.12 2996.52   1
  -1   1  24 4088.37 2710.51   1
  -1   1  24 6809.32 3119.69   1
   1  -1 -24 2460.68 2729.64   1
   1  -1 -24  165.66 2719.20   1
  -1   1  23  123.63 2455.81   1
  -1   1  23  223.03 2432.84   1
   1  -1 -23 -238.27 2137.09   1
   1  -1 -23 -2172.6 2497.91   1
  -1   1  22 5908.14 1999.30   1
  -1   1  22 1264.09 2295.06   1
   1  -1 -22 7275.57 2420.32   1
   1  -1 -22 2799.58 2537.58   1
  -1   1  21 1798.54 1959.29   1
  -1   1  21 3538.62 2324.98   1
   1  -1 -21 3359.77 2719.20   1
   1  -1 -21 1186.50 2189.98   1
  -1   1  20 -1898.7 1868.47   1
  -1   1  20 2632.22 2592.55   1
   1  -1 -20 1011.83 2799.58   1
   1  -1 -20  585.25 2658.31   1
  -1   1  19 1338.20 2484.34   1
  -1   1  19 3377.87 2442.24   1
   1  -1 -19 -369.17 2709.81   1
   1  -1 -19 -3768.3 2773.14   1
  -1   1  18  145.55 2108.91   1
  -1   1  18 9544.18 2846.55   1
   1  -1 -18 3288.45 2383.44   1
   1  -1 -18 1579.33 2704.24   1
  -1   1  17  11054. 1742.87   1
  -1   1  17  17356. 2830.55   1
   1  -1 -17  12599. 1967.64   1
   1  -1 -17  13194. 2698.68   1
  -1   1  16 8723.03 2111.69   1
  -1   1  16  11969. 1938.41   1
   1  -1 -16 6684.06 2090.46   1
   1  -1 -16 4505.91 2045.23   1
  -1   1  15  80445. 3792.62   1
  -1   1  15  77453. 3475.64   1
   1  -1 -15  87091. 4077.94   1
   1  -1 -15  75470. 3489.91   1
  -1   1  14  418.23 1914.75   1
  -1   1  14  807.93 2227.21   1
   1  -1 -14 4039.66 1835.77   1
   1  -1 -14  848.29 2218.16   1
  -1   1  13 102540. 4526.79   1
  -1   1  13  98886. 4084.90   1
   1  -1 -13 104697. 4321.50   1
   1  -1 -13 102470. 4575.50   1
  -1   1  12  52749. 3067.50   1
  -1   1  12  55845. 3111.69   1
   1  -1 -12  54280. 3219.90   1
   1  -1 -12  57028. 3086.29   1
  -1   1  11  215.66 1980.17   1
  -1   1  11 3296.10 2422.41   1
   1  -1 -11 3103.34 2348.99   1
   1  -1 -11 2854.90 1983.30   1
  -1   1  10  47704. 2866.04   1
  -1   1  10  53827. 3313.84   1
   1  -1 -10  52749. 3118.99   1
   1  -1 -10  55567. 3288.79   1
  -1   1   9  27860. 2283.92   1
  -1   1   9  26214. 2249.82   1
   1  -1  -9  28086. 2128.74   1
   1  -1  -9  26079. 2262.70   1
  -1   1   8  21816. 2158.66   1
  -1   1   8  21374. 2501.04   1
   1  -1  -8  26851. 2609.95   1
   1  -1  -8  19729. 2491.30   1
  -1   1   7  14161. 2462.77   1
  -1   1   7  10077. 1982.60   1
   1  -1  -7  12394. 2420.67   1
   1  -1  -7  12568. 2018.79   1
  -1   1   6  80306. 3970.07   1
  -1   1   6  74948. 3903.96   1
   1  -1  -6  81941. 3851.77   1
   1  -1  -6  78566. 4001.39   1
  -1   1   5 1582.81 2395.96   1
  -1   1   5 3357.34 2225.82   1
   1  -1  -5 4596.38 2157.62   1
   1  -1  -5 3837.85 2359.08   1
  -1   1   4  17189. 2219.55   1
  -1   1   4  16284. 2175.71   1
   1  -1  -4  19471. 2011.48   1
   1  -1  -4  12697. 1935.98   1
  -1   1   3  32797. 1913.01   1
  -1   1   3  34426. 2390.05   1
   1  -1  -3  34259. 2228.60   1
   1  -1  -3  34551. 2144.05   1
  -1   1   2 141092. 5107.86   1
  -1   1   2 131141. 4725.12   1
   1  -1  -2 137752. 4996.52   1
   1  -1  -2 142136. 5187.89   1
  -1   1   1 6527.48 829.505   1
  -1   1   1 5605.42 808.628   1
   1  -1  -1 6830.20 775.921   1
   1  -1  -1 5581.07 875.782   1
  -1   1   0 6478.77 630.132   1
  -1   1   0 5494.08 635.699   1
   1  -1   0 6102.99 605.775   1
   1  -1   0 6471.81 706.332   1
  -1   1  -1 2806.89 626.652   1
  -1   1  -1 2907.79 629.436   1
   1  -1   1 2953.72 594.293   1
   1  -1   1 2695.54 700.765   1
  -1   1  -2  10877. 942.240   1
  -1   1  -2  10223. 906.749   1
   1  -1   2  10289. 1017.74   1
   1  -1   2 9460.67 848.294   1
  -1   1  -3  25028. 1452.33   1
  -1   1  -3  27550. 1559.15   1
   1  -1   3  26580. 1749.82   1
   1  -1   3  23984. 1350.03   1
  -1   1  -4  55428. 2656.92   1
  -1   1  -4  56750. 2606.12   1
   1  -1   4  57133. 2810.37   1
   1  -1   4  54523. 2556.71   1
  -1   1  -5 -283.47 1693.80   1
  -1   1  -5 -194.12 1799.23   1
   1  -1   5  862.91 1581.42   1
   1  -1   5  467.29 1939.11   1
  -1   1  -6 3573.41 1862.56   1
  -1   1  -6 4951.28 2154.83   1
   1  -1   6 4832.98 2053.93   1
   1  -1   6 5309.67 1873.35   1
  -1   1  -7  18521. 2385.18   1
  -1   1  -7  20327. 2371.26   1
   1  -1   7  19948. 2491.99   1
   1  -1   7  18984. 2079.68   1
  -1   1  -8 113813. 4832.98   1
  -1   1  -8 114370. 4871.25   1
   1  -1   8 124217. 5146.13   1
   1  -1   8 119067. 4822.54   1
  -1   1  -9  11855. 2330.90   1
  -1   1  -9  13813. 2274.53   1
   1  -1   9 9001.38 2114.12   1
   1  -1   9  12519. 1982.95   1
  -1   1 -10 3604.73 2083.51   1
  -1   1 -10 2600.21 2146.48   1
   1  -1  10 3789.14 1890.74   1
   1  -1  10 2683.71 1901.53   1
  -1   1 -11  16879. 2105.77   1
  -1   1 -11  12843. 2580.72   1
   1  -1  11  14857. 2215.03   1
   1  -1  11  16413. 1616.21   1
  -1   1 -12  17516. 2338.55   1
  -1   1 -12  16211. 1968.68   1
   1  -1  12  17349. 2084.20   1
   1  -1  12  16440. 2070.28   1
  -1   1 -13 4645.09 2297.84   1
  -1   1 -13 4585.94 1871.95   1
   1  -1  13 3278.70 1672.58   1
   1  -1  13 5751.56 1965.90   1
  -1   1 -14  11482. 2475.29   1
  -1   1 -14 6910.22 2173.62   1
   1  -1  14 7773.13 2228.60   1
   1  -1  14 8281.13 1997.56   1
  -1   1 -15 3463.46 1701.81   1
  -1   1 -15 1227.56 1513.57   1
   1  -1  15 3081.42 1944.33   1
   1  -1  15 1548.36 1723.73   1
  -1   1 -16 5448.85 1924.15   1
  -1   1 -16 3897.00 1742.87   1
   1  -1  16 4398.05 1638.48   1
   1  -1  16 6945.02 1787.05   1
  -1   1 -17  20672. 2713.98   1
  -1   1 -17  28131. 2688.93   1
   1  -1  17  22648. 2540.01   1
   1  -1  17  22220. 2413.01   1
  -1   1 -18  15598. 2749.82   1
   1  -1  18  12220. 2925.88   1
   1  -1  18 9425.88 2577.59   1
  -1   1 -19  26019. 2849.34   1
  -1   1 -19  25369. 3023.31   1
   1  -1  19  14910. 2882.39   1
   1  -1  19  22697. 2792.62   1
  -1   1 -20  14701. 2186.50   1
  -1   1 -20 8907.44 2215.38   1
   1  -1  20  14697. 2270.35   1
   1  -1  20  17895. 2602.99   1
  -1   1 -21 -4655.5 2499.30   1
  -1   1 -21  994.78 1950.59   1
   1  -1  21 -2248.1 2005.57   1
   1  -1  21 -1039.3 2136.05   1
  -1   1 -22 -2591.5 2807.93   1
  -1   1 -22 -187.89 2433.19   1
   1  -1  22 2307.58 2809.67   1
   1  -1  22 3378.22 2079.68   1
  -1   1 -23 -314.06 2761.65   1
  -1   1 -23  976.69 2503.82   1
   1  -1  23 -3510.8 3037.58   1
   1  -1  23  553.24 2326.02   1
  -1   1 -24  14969. 2497.91   1
  -1   1 -24 6541.40 2718.16   1
   1  -1  24  15473. 3229.99   1
   1  -1  24  10386. 2463.12   1
  -1   1 -25 -5643.7 2339.25   1
  -1   1 -25  600.90 2463.81   1
   1  -1  25  413.71 2114.12   1
   1  -1  25 -1151.7 2478.43   1
  -1   1 -26 4241.47 2897.35   1
  -1   1 -26 3372.30 2724.08   1
   1  -1  26 2828.11 2453.37   1
   1  -1  26 -1203.9 2271.74   1
  -1   1 -27 5086.98 2266.53   1
  -1   1 -27 3025.05 3197.28   1
   1  -1  27 1516.00 3110.99   1
   1  -1  27 2129.78 2334.72   1
  -1   0  27 1600.21 2887.61   1
  -1   0  27 5024.35 2972.16   1
   1   0 -27 -1162.5 2929.36   1
   1   0 -27 8465.54 3122.47   1
  -1   0  26 6697.98 2881.35   1
  -1   0  26 -1397.0 2858.38   1
   1   0 -26 4745.99 3101.25   1
   1   0 -26 2067.50 3025.05   1
  -1   0  25 1450.59 2986.08   1
  -1   0  25 -131.07 2918.23   1
   1   0 -25 1133.61 2946.76   1
   1   0 -25  451.98 3263.04   1
  -1   0  24 2712.25 3018.09   1
   1   0 -24 -2957.9 2632.91   1
   1   0 -24 -3297.1 3035.84   1
  -1   0  23 1386.22 2793.32   1
  -1   0  23 1208.77 2705.98   1
   1   0 -23 3691.72 2686.50   1
   1   0 -23 4084.90 2846.90   1
  -1   0  22 -3890.0 2693.46   1
  -1   0  22 -3702.2 2502.78   1
   1   0 -22 1292.97 1992.69   1
   1   0 -22 3594.29 2607.86   1
  -1   0  21 3528.18 2719.55   1
  -1   0  21 1560.19 2561.58   1
   1   0 -21 5455.81 2106.82   1
   1   0 -21 7755.73 2541.75   1
  -1   0  20 7376.47 2150.66   1
  -1   0  20 5274.87 2728.60   1
   1   0 -20 6670.14 2169.10   1
   1   0 -20 5535.83 2170.84   1
  -1   0  19  11719. 2204.24   1
  -1   0  19  11454. 2576.55   1
   1   0 -19 7922.75 2112.38   1
   1   0 -19  11917. 2213.29   1
  -1   0  18 -1292.6 2201.81   1
  -1   0  18  880.65 1970.77   1
   1   0 -18 -213.88 1933.89   1
   1   0 -18 -543.14 2334.37   1
  -1   0  17  709.46 2026.44   1
  -1   0  17 -615.17 1915.80   1
   1   0 -17 -311.76 2076.20   1
   1   0 -17 5048.71 2295.41   1
  -1   0  16  422.06 1938.06   1
  -1   0  16 2843.07 1696.94   1
   1   0 -16 -2724.4 2092.55   1
   1   0 -16 -1716.4 2050.45   1
  -1   0  15 -1536.5 1630.13   1
  -1   0  15 -879.96 1878.56   1
   1   0 -15  429.71 2144.74   1
   1   0 -15 1191.37 1972.16   1
  -1   0  14 9168.40 1967.64   1
  -1   0  14 9074.45 2125.61   1
   1   0 -14  11959. 2301.67   1
   1   0 -14 7459.98 2229.29   1
  -1   0  13  24342. 2330.55   1
  -1   0  13  16764. 2283.57   1
   1   0 -13  25017. 2914.40   1
   1   0 -13  19353. 2609.25   1
  -1   0  12 -917.88 2160.05   1
  -1   0  12 1399.79 1923.45   1
   1   0 -12 2646.14 2218.86   1
   1   0 -12 3120.04 2528.88   1
  -1   0  11 -821.85 2254.35   1
  -1   0  11 -1685.1 1783.92   1
   1   0 -11 -663.53 2019.48   1
   1   0 -11 5664.57 2511.13   1
  -1   0  10  892.48 1488.17   1
  -1   0  10 4972.16 2318.72   1
   1   0 -10 5574.11 2628.74   1
   1   0 -10  -15.27 1582.46   1
  -1   0   9  18789. 2228.95   1
  -1   0   9  15939. 2461.72   1
   1   0  -9  21754. 2279.40   1
   1   0  -9  24123. 2982.25   1
  -1   0   8  28730. 2484.69   1
  -1   0   8  29165. 2735.91   1
   1   0  -8  28170. 2656.57   1
   1   0  -8  23020. 2999.30   1
  -1   0   7 -173.14 2288.45   1
  -1   0   7 1353.86 1479.47   1
   1   0  -7 2225.82 2057.06   1
   1   0  -7 -1414.1 2470.07   1
  -1   0   6  12533. 2177.80   1
  -1   0   6  13038. 2351.08   1
   1   0  -6  14339. 2204.24   1
   1   0  -6  15351. 2005.22   1
  -1   0   5 4704.24 1386.92   1
  -1   0   5 4780.79 1613.43   1
   1   0  -5 3194.50 1834.72   1
   1   0  -5 3893.52 2165.97   1
  -1   0   4  10946. 2028.18   1
  -1   0   4 9784.26 1489.21   1
   1   0  -4 9224.07 1801.32   1
   1   0  -4 9613.77 2023.66   1
  -1   0   3 100139. 3914.40   1
  -1   0   3  97251. 3695.19   1
   1   0  -3  97495. 3691.72   1
   1   0  -3  97669. 3823.94   1
  -1   0   2 2330.20 807.584   1
  -1   0   2 -545.93 1075.50   1
   1   0  -2 1604.38 1036.53   1
   1   0  -2 2671.19 869.171   1
  -1   0   1 3243.56 493.736   1
  -1   0   1 3088.72 697.981   1
   1   0  -1 3681.28 643.354   1
   1   0  -1 3070.98 577.244   1
  -1   0   0  12039. 484.690   1
   1   0   0  12171. 494.780   1
  -1   0  -1 1944.33 531.315   1
   1   0   1 2528.88 540.709   1
  -1   0  -2 3069.24 962.073   1
  -1   0  -2 3394.92 861.864   1
   1   0   2 3407.09 977.730   1
   1   0   2 4592.90 957.898   1
  -1   0  -3 347634.  12157.   1
  -1   0  -3 309429.  10793.   1
   1   0   3 357689.  12498.   1
   1   0   3 337961.  11792.   1
  -1   0  -4  88935. 3667.36   1
  -1   0  -4  80550. 3500.34   1
   1   0   4  82429. 3459.63   1
   1   0   4  85630. 3556.02   1
  -1   0  -5 115831. 4599.86   1
  -1   0  -5 107272. 4321.50   1
   1   0   5 111065. 4505.91   1
   1   0   5 109742. 4251.91   1
  -1   0  -6  32022. 2810.37   1
  -1   0  -6  38483. 2726.51   1
   1   0   6  38135. 2537.58   1
   1   0   6  35804. 2565.41   1
  -1   0  -7 475643.  16802.   1
  -1   0  -7 513917.  18090.   1
   1   0   7 481558.  17008.   1
   1   0   7 495476.  17418.   1
  -1   0  -8  38239. 3601.25   1
  -1   0  -8  38205. 2796.45   1
   1   0   8  33887. 2909.53   1
  -1   0  -9  13431. 2022.96   1
  -1   0  -9 7724.42 2365.34   1
   1   0   9  12742. 1865.69   1
   1   0   9 9707.71 2034.44   1
  -1   0 -10 5688.93 1772.79   1
  -1   0 -10 5257.48 1548.36   1
   1   0  10 7240.77 1760.26   1
   1   0  10 3298.54 1763.39   1
  -1   0 -11 2436.32 2296.80   1
  -1   0 -11 7870.56 1617.26   1
   1   0  11 5149.61 2352.47   1
   1   0  11 6005.56 1479.47   1
  -1   0 -12  467.29 1516.35   1
  -1   0 -12  784.62 2335.07   1
   1   0  12 1870.91 2342.73   1
   1   0  12 -2808.6 1391.44   1
  -1   0 -13  14029. 1758.18   1
  -1   0 -13  15090. 2514.26   1
   1   0  13  12262. 2430.76   1
   1   0  13  10908. 1529.92   1
  -1   0 -14 -501.74 2221.64   1
  -1   0 -14 1491.30 1834.03   1
   1   0  14 -1189.3 1376.83   1
   1   0  14 1724.77 2173.28   1
  -1   0 -15  113.08 2178.84   1
  -1   0 -15 5205.28 1866.04   1
   1   0  15 3670.84 2005.91   1
   1   0  15 4572.02 1562.63   1
  -1   0 -16 5180.93 2152.05   1
  -1   0 -16 4467.64 1925.89   1
   1   0  16 6555.32 1960.33   1
   1   0  16 1733.47 1613.43   1
  -1   0 -17 -783.23 2173.62   1
  -1   0 -17  154.59 2001.39   1
   1   0  17 -2304.5 1632.57   1
   1   0  17 -1013.6 1796.45   1
  -1   0 -18  13222. 2400.14   1
  -1   0 -18 7473.90 2567.15   1
   1   0  18 8869.16 2093.60   1
   1   0  18  12223. 2386.91   1
  -1   0 -19 3587.33 2395.96   1
  -1   0 -19 3785.66 2679.19   1
   1   0  19  -44.26 2019.83   1
   1   0  19 2164.23 2449.89   1
  -1   0 -20 -1033.4 2971.12   1
  -1   0 -20 1288.79 2382.74   1
   1   0  20 -1305.5 2036.53   1
   1   0  20 8427.27 2755.74   1
  -1   0 -21 4422.40 2887.26   1
  -1   0 -21 2729.99 2661.10   1
   1   0  21 -317.08 2147.88   1
   1   0  21 -1744.3 2788.10   1
  -1   0 -22 2316.63 2641.96   1
  -1   0 -22 -3124.2 2817.33   1
   1   0  22 2253.30 2913.71   1
   1   0  22  847.25 1924.15   1
  -1   0 -23 3733.47 2574.81   1
  -1   0 -23 1956.50 2919.27   1
   1   0  23 4331.94 2359.43   1
   1   0  23  703.90 2862.91   1
  -1   0 -24  936.67 2858.03   1
  -1   0 -24 6224.77 2705.29   1
   1   0  24 6433.54 2622.82   1
   1   0  24 6026.44 2607.86   1
  -1   0 -25  11980. 2664.58   1
  -1   0 -25 7637.43 3255.04   1
   1   0  25  12164. 2744.95   1
   1   0  25 9488.51 2336.46   1
  -1   0 -26 -494.43 3100.90   1
  -1   0 -26 -627.70 2571.67   1
   1   0  26 -2084.9 2759.91   1
   1   0  26  138.76 2169.10   1
  -1   0 -27 -8228.9 3431.45   1
  -1   0 -27  622.13 2477.03   1
   1   0  27 -1163.9 3677.80   1
   1   0  27 -3258.9 2507.65   1
  -1  -1  27 -1243.6 2631.52   1
  -1  -1  27 2721.64 2909.18   1
   1   1 -27 -3272.4 2764.09   1
   1   1 -27 -6990.3 2985.73   1
  -1  -1  26  24488. 3381.35   1
  -1  -1  26  30007. 3224.77   1
   1   1 -26  33476. 3286.71   1
   1   1 -26  30630. 3470.77   1
  -1  -1  25 -2216.8 2843.77   1
  -1  -1  25 -1591.5 2991.65   1
   1   1 -25 4759.91 3070.63   1
   1   1 -25 -1754.0 2807.23   1
  -1  -1  24 5417.53 2798.88   1
  -1  -1  24 1520.53 2342.73   1
   1   1 -24 6102.99 2749.82   1
   1   1 -24 8416.83 2590.81   1
  -1  -1  23 -1857.3 2451.28   1
  -1  -1  23 4968.68 2206.33   1
   1   1 -23 1774.18 2761.65   1
   1   1 -23 1908.49 2532.01   1
  -1  -1  22  10525. 2953.37   1
  -1  -1  22 8695.19 2877.87   1
   1   1 -22 5821.15 2771.05   1
   1   1 -22 5695.89 3029.57   1
  -1  -1  21 1498.26 2477.38   1
  -1  -1  21 4203.20 3127.00   1
   1   1 -21 6148.22 2743.21   1
   1   1 -21 7386.91 3088.03   1
  -1  -1  20  15619. 2276.27   1
  -1  -1  20  14739. 2326.02   1
   1   1 -20  17704. 2614.47   1
   1   1 -20  17808. 2441.19   1
  -1  -1  19 5066.11 2215.73   1
  -1  -1  19 4624.21 2509.04   1
   1   1 -19 1555.67 1958.24   1
   1   1 -19 8489.90 2729.99   1
  -1  -1  18  55985. 3629.08   1
  -1  -1  18  65379. 3823.94   1
   1   1 -18  69694. 4053.58   1
   1   1 -18  55463. 3789.14   1
  -1  -1  17  10866. 2083.16   1
  -1  -1  17  12300. 2697.28   1
   1   1 -17  11134. 2593.25   1
   1   1 -17  11023. 2436.32   1
  -1  -1  16  23330. 2192.76   1
  -1  -1  16  21736. 1917.19   1
   1   1 -16  20539. 1914.75   1
   1   1 -16  23500. 2184.76   1
  -1  -1  15  43319. 2816.98   1
  -1  -1  15  42484. 2743.56   1
   1   1 -15  41823. 2831.59   1
   1   1 -15  39214. 2937.02   1
  -1  -1  14 2235.56 2012.87   1
  -1  -1  14  481.21 1402.92   1
   1   1 -14  284.90 1889.35   1
   1   1 -14 -696.59 2277.66   1
  -1  -1  13 3514.26 2050.80   1
  -1  -1  13 -788.10 1505.57   1
   1   1 -13 4530.27 2325.33   1
   1   1 -13 2235.21 1735.91   1
  -1  -1  12  21994. 2103.34   1
  -1  -1  12  19624. 2808.97   1
   1   1 -12  20745. 1906.75   1
   1   1 -12  21743. 2577.24   1
  -1  -1  11  71990. 3435.97   1
  -1  -1  11  76026. 3348.29   1
   1   1 -11  71573. 3573.41   1
   1   1 -11  77070. 3886.57   1
  -1  -1  10  932.50 1939.80   1
  -1  -1  10 1589.07 1715.38   1
   1   1 -10  942.59 2194.50   1
   1   1 -10 -113.99 1636.74   1
  -1  -1   9 115588. 4669.45   1
  -1  -1   9 117188. 4888.65   1
   1   1  -9 108838. 4561.58   1
   1   1  -9 122721. 5125.26   1
  -1  -1   8  18295. 2056.37   1
  -1  -1   8  18086. 2283.92   1
   1   1  -8  22704. 1970.42   1
   1   1  -8  21353. 1947.81   1
  -1  -1   7  38031. 2173.97   1
  -1  -1   7  43389. 2859.08   1
   1   1  -7  37474. 2720.94   1
   1   1  -7  44294. 2886.22   1
  -1  -1   6  59603. 2920.67   1
  -1  -1   6  55254. 2822.20   1
   1   1  -6  63396. 3159.01   1
   1   1  -6  59534. 3033.40   1
  -1  -1   5  493.39 1632.22   1
  -1  -1   5 -2546.6 2230.69   1
   1   1  -5 -112.73 1754.35   1
   1   1  -5 2534.79 2021.57   1
  -1  -1   4  14081. 1577.24   1
  -1  -1   4  11576. 1527.49   1
   1   1  -4  14130. 1543.49   1
   1   1  -4  14805. 1762.35   1
  -1  -1   3  24252. 1888.66   1
  -1  -1   3  25355. 1628.04   1
   1   1  -3  27070. 1728.95   1
   1   1  -3  26465. 1844.47   1
  -1  -1   2 204732. 7212.94   1
  -1  -1   2 208524. 7334.72   1
   1   1  -2 201218. 7084.20   1
   1   1  -2 204697. 7230.33   1
  -1  -1   1  10042. 953.026   1
  -1  -1   1 9366.73 789.143   1
   1   1  -1 9227.55 929.018   1
   1   1  -1 8702.15 930.758   1
  -1  -1   0  53236. 2130.83   1
  -1  -1   0  50278. 1941.20   1
   1   1   0  52331. 2063.67   1
   1   1   0  48887. 1951.63   1
  -1  -1  -1  18866. 1163.88   1
  -1  -1  -1  19141. 1068.89   1
   1   1   1  18452. 1183.02   1
   1   1   1  18278. 1165.62   1
  -1  -1  -2 156820. 5588.03   1
  -1  -1  -2 157968. 5695.89   1
   1   1   2 151670. 5476.68   1
   1   1   2 162317. 5828.11   1
  -1  -1  -3  10978. 1681.97   1
  -1  -1  -3  10932. 1645.09   1
   1   1   3 9947.80 1459.29   1
   1   1   3 9189.27 1392.48   1
  -1  -1  -4 129436. 5055.67   1
  -1  -1  -4 131072. 5104.38   1
   1   1   4 132533. 5059.15   1
   1   1   4 132811. 5236.60   1
  -1  -1  -5  31976. 2407.79   1
  -1  -1  -5  33726. 2369.87   1
   1   1   5  32815. 2391.09   1
   1   1   5  27623. 2026.09   1
  -1  -1  -6 678496.  23657.   1
  -1  -1  -6 645441.  22543.   1
   1   1   6 643702.  22453.   1
   1   1   6 693110.  24245.   1
  -1  -1  -7 4993.04 1642.66   1
  -1  -1  -7 7192.06 2254.70   1
   1   1   7 6249.12 2417.19   1
   1   1   7 8128.04 2137.78   1
  -1  -1  -8  13511. 2364.65   1
  -1  -1  -8  11674. 2162.84   1
   1   1   8 8448.15 2079.33   1
   1   1   8 9801.66 2316.98   1
  -1  -1  -9  540.71 1569.59   1
  -1  -1  -9 -1899.1 1813.15   1
   1   1   9  189.80 2050.80   1
   1   1   9 -1777.7 2018.09   1
  -1  -1 -10 4617.25 2099.51   1
  -1  -1 -10 3135.70 1619.69   1
   1   1  10 5490.60 2093.60   1
   1   1  10 2871.60 2079.33   1
  -1  -1 -11  16141. 2095.68   1
  -1  -1 -11  15692. 2336.11   1
   1   1  11  15505. 1859.43   1
   1   1  11  14127. 2194.50   1
  -1  -1 -12 4592.90 2224.42   1
  -1  -1 -12 5845.51 1609.60   1
   1   1  12 3371.26 2033.40   1
   1   1  12 4244.95 1463.81   1
  -1  -1 -13 5073.06 2192.06   1
  -1  -1 -13 2917.53 2115.86   1
   1   1  13 2164.92 2218.51   1
   1   1  13 7185.10 2032.70   1
  -1  -1 -14 5821.15 1508.35   1
  -1  -1 -14 5636.74 1940.15   1
   1   1  14 6482.25 1670.49   1
   1   1  14 7870.56 1486.43   1
  -1  -1 -15 5320.11 2120.74   1
  -1  -1 -15 5640.22 2115.52   1
   1   1  15 3587.33 1925.19   1
   1   1  15 6697.98 2209.46   1
  -1  -1 -16  -73.70 2278.36   1
  -1  -1 -16 -106.65 1977.73   1
   1   1  16 2453.02 1990.26   1
   1   1  16  882.39 1926.23   1
  -1  -1 -17 5880.30 1867.78   1
  -1  -1 -17 7557.40 1792.62   1
   1   1  17 3834.37 1727.21   1
   1   1  17 1789.49 1568.20   1
  -1  -1 -18  30633. 3034.10   1
  -1  -1 -18  34541. 3214.68   1
   1   1  18  34391. 3054.97   1
   1   1  18  36047. 2968.33   1
  -1  -1 -19  15957. 3032.70   1
  -1  -1 -19  11931. 2815.59   1
   1   1  19  12975. 2611.34   1
   1   1  19  15282. 2548.71   1
  -1  -1 -20  11604. 2994.43   1
  -1  -1 -20  12258. 2494.78   1
   1   1  20  15880. 2453.02   1
   1   1  20  11447. 1990.26   1
  -1  -1 -21  12620. 2855.25   1
   1   1  21  12136. 2149.62   1
   1   1  21 5372.30 2234.17   1
  -1  -1 -22  11402. 2916.14   1
  -1  -1 -22  15254. 2646.48   1
   1   1  22 6753.65 2407.44   1
   1   1  22 9321.49 2809.67   1
  -1  -1 -23  14036. 2652.05   1
  -1  -1 -23  13737. 3166.32   1
   1   1  23  11086. 2920.67   1
   1   1  23  13493. 2850.38   1
  -1  -1 -24 4070.98 3011.13   1
  -1  -1 -24 2532.36 2507.65   1
   1   1  24 1447.11 3246.00   1
   1   1  24 -3709.1 2139.52   1
  -1  -1 -25 -420.67 3033.40   1
  -1  -1 -25  112.56 2148.92   1
   1   1  25  835.07 2890.39   1
   1   1  25 -594.99 2517.05   1
  -1  -1 -26 5149.61 2922.06   1
  -1  -1 -26 7251.21 3118.30   1
   1   1  26 7905.35 3089.07   1
   1   1  26 -1504.2 2954.76   1
  -1  -1 -27 4846.90 3124.56   1
  -1  -1 -27  409.19 2866.04   1
   1   1  27 -1156.9 3478.08   1
   1   1  27 3562.98 3051.15   1
  -1  -2  27    6.59 2692.76   1
  -1  -2  27 1120.04 2435.63   1
   1   2 -27 4505.91 2678.49   1
   1   2 -27 1279.05 2320.46   1
  -1  -2  26 5316.63 3199.02   1
  -1  -2  26 2023.66 2723.73   1
   1   2 -26 8576.89 2864.99   1
   1   2 -26 1629.09 3118.30   1
  -1  -2  25  16569. 2997.21   1
  -1  -2  25  13866. 3053.23   1
   1   2 -25  12686. 3106.47   1
   1   2 -25  15421. 3187.54   1
  -1  -2  24 7842.72 2782.88   1
  -1  -2  24 3106.12 2328.46   1
   1   2 -24 6311.75 2767.57   1
   1   2 -24 4690.32 2697.98   1
  -1  -2  23  13187. 2342.73   1
  -1  -2  23  17359. 3328.46   1
   1   2 -23  15571. 2460.68   1
   1   2 -23  20216. 3448.15   1
  -1  -2  22 4937.36 2474.25   1
  -1  -2  22 6600.55 2828.81   1
   1   2 -22 7272.09 2323.24   1
   1   2 -22 6638.82 2312.45   1
  -1  -2  21  19141. 2866.04   1
  -1  -2  21  13817. 2729.64   1
   1   2 -21  18469. 2818.37   1
   1   2 -21  17116. 3039.31   1
  -1  -2  20  920.32 2218.51   1
  -1  -2  20 3130.83 2988.17   1
   1   2 -20 -1806.2 2174.67   1
   1   2 -20 -3020.9 2959.98   1
  -1  -2  19 1250.52 2397.01   1
  -1  -2  19 -1129.1 1977.73   1
   1   2 -19 2154.49 2509.39   1
   1   2 -19 1048.02 2145.79   1
  -1  -2  18 2074.11 2629.43   1
  -1  -2  18 -1197.3 1928.67   1
   1   2 -18 1580.37 2342.73   1
   1   2 -18 2411.27 2956.16   1
  -1  -2  17  18866. 2045.58   1
  -1  -2  17  13191. 2130.83   1
   1   2 -17  15814. 2161.10   1
  -1  -2  16 3154.83 1660.40   1
  -1  -2  16 -974.95 2042.10   1
   1   2 -16  405.36 2386.91   1
   1   2 -16 -423.10 1403.27   1
  -1  -2  15  10713. 1932.84   1
  -1  -2  15 8959.63 1869.87   1
   1   2 -15  10769. 2070.28   1
   1   2 -15 7717.46 2312.45   1
  -1  -2  14 5643.70 2017.74   1
  -1  -2  14 1228.60 1774.53   1
   1   2 -14 2732.77 1990.95   1
   1   2 -14 2496.52 1608.56   1
  -1  -2  13 -1805.8 2051.49   1
  -1  -2  13 -933.54 2006.26   1
   1   2 -13 -1213.3 1960.33   1
   1   2 -13 2738.34 1899.79   1
  -1  -2  12  78392. 3698.67   1
  -1  -2  12  74113. 3649.96   1
   1   2 -12  73173. 3559.50   1
   1   2 -12  79993. 3750.87   1
  -1  -2  11  220.88 1266.87   1
  -1  -2  11 -142.17 2067.50   1
   1   2 -11   57.34 1748.08   1
   1   2 -11 -161.90 1799.58   1
  -1  -2  10  14405. 1790.19   1
  -1  -2  10 8702.15 1882.74   1
   1   2 -10  10511. 2054.63   1
   1   2 -10  13949. 1993.39   1
  -1  -2   9  97947. 4384.13   1
  -1  -2   9  91754. 3980.51   1
   1   2  -9  91754. 4004.87   1
   1   2  -9  98434. 4265.83   1
  -1  -2   8 4067.50 1808.63   1
  -1  -2   8 4457.20 2317.33   1
   1   2  -8 8521.22 2164.92   1
   1   2  -8 6910.22 1967.99   1
  -1  -2   7 336117.  12004.   1
  -1  -2   7 317432.  11479.   1
   1   2  -7 318232.  11385.   1
   1   2  -7 319380.  11374.   1
  -1  -2   6  60578. 2862.91   1
  -1  -2   6  63535. 3426.93   1
   1   2  -6  71190. 3336.46   1
   1   2  -6  67293. 3164.92   1
  -1  -2   5 1451.98 2183.02   1
  -1  -2   5 4279.75 1735.91   1
   1   2  -5 2243.91 1749.82   1
   1   2  -5 3910.92 1982.25   1
  -1  -2   4  18083. 1763.05   1
  -1  -2   4  15880. 1948.85   1
   1   2  -4  17008. 1635.70   1
   1   2  -4  19488. 1954.42   1
  -1  -2   3 107342. 4157.96   1
  -1  -2   3 106924. 4140.57   1
   1   2  -3 112630. 4411.97   1
   1   2  -3 105497. 4161.44   1
  -1  -2   2  16907. 1400.83   1
  -1  -2   2  16016. 1652.75   1
   1   2  -2  16942. 1577.24   1
   1   2  -2  14193. 1499.30   1
  -1  -2   1  16862. 1461.72   1
  -1  -2   1  14294. 1429.37   1
   1   2  -1  18779. 1537.23   1
   1   2  -1  17801. 1461.72   1
  -1  -2   0  10181. 1574.46   1
  -1  -2   0 9161.44 1177.45   1
   1   2   0  10518. 1395.61   1
   1   2   0 7713.98 1370.91   1
  -1  -2  -1 9610.29 1535.14   1
  -1  -2  -1 8959.63 1239.73   1
   1   2   1 6823.24 1454.77   1
   1   2   1 6788.44 1286.36   1
  -1  -2  -2 1631.52 1449.89   1
  -1  -2  -2 4599.86 1310.37   1
   1   2   2 1389.00 1529.57   1
   1   2   2 4405.01 1540.01   1
  -1  -2  -3  20644. 1755.04   1
  -1  -2  -3  18907. 1962.77   1
   1   2   3  14443. 1780.44   1
   1   2   3  18038. 2022.96   1
  -1  -2  -4 1563.32 1931.10   1
  -1  -2  -4 4460.68 1906.75   1
   1   2   4 2375.78 1496.17   1
   1   2   4 5998.60 1835.07   1
  -1  -2  -5 182881. 6851.07   1
  -1  -2  -5 192171. 7185.10   1
   1   2   5 189631. 7014.61   1
   1   2   5 198538. 7470.42   1
  -1  -2  -6  11795. 2350.73   1
  -1  -2  -6 7035.48 2127.00   1
   1   2   6 3041.05 1778.36   1
   1   2   6 8841.33 2189.28   1
  -1  -2  -7 2534.44 1674.67   1
  -1  -2  -7 4137.09 2031.31   1
   1   2   7 1017.74 1864.99   1
   1   2   7 -2910.6 1717.47   1
  -1  -2  -8 1413.01 2066.11   1
  -1  -2  -8 2897.35 1968.68   1
   1   2   8  290.29 1773.14   1
   1   2   8 -179.82 1576.55   1
  -1  -2  -9  16002. 2250.87   1
  -1  -2  -9  13921. 1709.46   1
   1   2   9  15800. 1715.03   1
   1   2   9  16440. 2391.79   1
  -1  -2 -10  17220. 2395.27   1
  -1  -2 -10  19600. 2361.86   1
   1   2  10  17279. 2235.21   1
   1   2  10  14930. 2487.82   1
  -1  -2 -11  22404. 2389.00   1
  -1  -2 -11  25344. 2353.51   1
   1   2  11  24802. 2174.32   1
   1   2  11  32331. 2703.55   1
  -1  -2 -12 6343.07 2073.07   1
  -1  -2 -12 4794.71 2109.25   1
   1   2  12 2939.80 2048.01   1
   1   2  12 -197.53 2105.77   1
  -1  -2 -13 4944.32 2135.70   1
  -1  -2 -13 7505.21 2091.16   1
   1   2  13 7299.92 2129.78   1
   1   2  13 8952.67 2149.96   1
  -1  -2 -14 5455.81 2089.07   1
  -1  -2 -14 7800.97 2000.35   1
   1   2  14 9425.88 2087.33   1
   1   2  14 6402.22 2025.05   1
  -1  -2 -15  16917. 1779.40   1
  -1  -2 -15  20400. 2292.97   1
   1   2  15  22523. 1885.18   1
   1   2  15  19144. 1779.75   1
  -1  -2 -16 -1094.3 2263.74   1
  -1  -2 -16 4881.69 2348.99   1
   1   2  16 3068.54 2170.49   1
   1   2  16 -956.85 2065.76   1
  -1  -2 -17 2093.25 2382.39   1
  -1  -2 -17 4001.39 1958.94   1
   1   2  17 -1214.0 2350.73   1
   1   2  17 2306.54 2205.29   1
  -1  -2 -18  17874. 3027.14   1
  -1  -2 -18  17940. 2608.21   1
   1   2  18  27283. 2570.63   1
   1   2  18  22209. 2700.42   1
  -1  -2 -19  21336. 2470.07   1
  -1  -2 -19  26291. 2920.67   1
   1   2  19  20665. 2854.56   1
   1   2  19  23208. 2633.61   1
  -1  -2 -20 2167.01 2944.33   1
  -1  -2 -20  189.32 2823.24   1
   1   2  20 -589.77 2556.02   1
   1   2  20 3507.30 2633.61   1
  -1  -2 -21  14875. 2672.58   1
  -1  -2 -21  10449. 2549.41   1
   1   2  21  13911. 2546.97   1
   1   2  21  15699. 2052.54   1
  -1  -2 -22 4745.99 2924.84   1
  -1  -2 -22  951.98 2625.95   1
   1   2  22 1905.01 2731.03   1
   1   2  22 4432.84 2665.62   1
  -1  -2 -23 7613.08 2554.63   1
  -1  -2 -23 8131.52 2941.54   1
   1   2  23 8670.83 2814.54   1
   1   2  23 8552.53 2496.52   1
  -1  -2 -24  16674. 3226.51   1
  -1  -2 -24  11409. 2731.73   1
   1   2  24  15411. 2664.92   1
   1   2  24  14231. 2536.88   1
  -1  -2 -25 4676.40 2796.10   1
  -1  -2 -25 3429.02 3331.59   1
   1   2  25 2786.71 1996.17   1
   1   2  25 2664.92 2825.68   1
  -1  -2 -26 9634.65 2764.44   1
  -1  -2 -26  12770. 2524.70   1
   1   2  26 9231.03 2801.32   1
   1   2  26  14777. 2314.54   1
  -1  -3  27  859.08 2925.54   1
  -1  -3  27 -988.17 2670.14   1
   1   3 -27 1739.04 2689.98   1
   1   3 -27 -2179.9 2754.00   1
  -1  -3  26  21155. 3145.79   1
  -1  -3  26  25498. 3073.76   1
   1   3 -26  24843. 3141.61   1
   1   3 -26  18914. 3247.04   1
  -1  -3  25 1500.69 2856.64   1
  -1  -3  25  522.27 3204.24   1
   1   3 -25 -426.93 2780.79   1
   1   3 -25 -261.27 3088.38   1
  -1  -3  24 4756.43 2378.91   1
  -1  -3  24 1249.13 2297.49   1
   1   3 -24 3354.90 2215.03   1
   1   3 -24 -226.10 2826.37   1
  -1  -3  23 6969.37 3128.74   1
  -1  -3  23 7181.62 2588.72   1
   1   3 -23 4944.32 2685.11   1
   1   3 -23 3298.54 3222.34   1
  -1  -3  22 -158.18 2076.55   1
  -1  -3  22 3848.29 2163.88   1
   1   3 -22 5240.08 2345.86   1
   1   3 -22 6395.26 2494.43   1
  -1  -3  21  13048. 2693.46   1
  -1  -3  21  13038. 2976.34   1
   1   3 -21  11270. 2637.78   1
   1   3 -21  10139. 3163.88   1
  -1  -3  20  86534. 4189.28   1
  -1  -3  20  79889. 4053.58   1
   1   3 -20  88726. 4168.40   1
   1   3 -20  92797. 4718.16   1
  -1  -3  19  637.44 2436.32   1
  -1  -3  19 1427.97 2467.99   1
   1   3 -19  -32.83 2689.28   1
   1   3 -19 -3702.2 2568.54   1
  -1  -3  18  18309. 2521.57   1
  -1  -3  18  18201. 2925.88   1
   1   3 -18  21329. 2618.30   1
   1   3 -18  13361. 3023.31   1
  -1  -3  17 2624.56 1918.23   1
  -1  -3  17 4185.80 2131.52   1
   1   3 -17 6701.46 1709.46   1
   1   3 -17 3848.29 2441.89   1
  -1  -3  16  29875. 2290.53   1
  -1  -3  16  27293. 2176.76   1
   1   3 -16  29443. 2187.54   1
   1   3 -16  25717. 2019.83   1
  -1  -3  15 3372.65 1871.26   1
  -1  -3  15 2262.00 1639.53   1
   1   3 -15 3653.44 1328.46   1
   1   3 -15 3007.65 1812.80   1
  -1  -3  14  20811. 2100.21   1
  -1  -3  14  16726. 2042.10   1
   1   3 -14  17255. 1983.99   1
   1   3 -14  18650. 1873.00   1
  -1  -3  13  374.04 1887.61   1
  -1  -3  13   64.37 1490.26   1
   1   3 -13 -2388.3 2012.87   1
   1   3 -13 -312.14 1415.45   1
  -1  -3  12  804.45 1564.72   1
  -1  -3  12 5027.83 2006.96   1
   1   3 -12 3785.66 1350.38   1
   1   3 -12 3135.35 1921.71   1
  -1  -3  11 -2607.9 2067.50   1
  -1  -3  11 -3198.3 1617.26   1
   1   3 -11 -3120.4 1781.49   1
   1   3 -11 -874.39 1788.79   1
  -1  -3  10  17909. 1930.06   1
  -1  -3  10  21440. 2479.12   1
   1   3 -10  22627. 2044.19   1
   1   3 -10  22345. 2314.54   1
  -1  -3   9  11180. 1928.67   1
  -1  -3   9 7828.80 2247.74   1
   1   3  -9  12836. 1963.46   1
   1   3  -9  14078. 2042.45   1
  -1  -3   8  30985. 2586.29   1
  -1  -3   8  29137. 2216.77   1
   1   3  -8  32557. 2188.93   1
   1   3  -8  29589. 1983.99   1
  -1  -3   7 9860.81 2307.24   1
  -1  -3   7 9109.25 1882.04   1
   1   3  -7  10873. 1891.09   1
   1   3  -7 8924.83 1943.28   1
  -1  -3   6 576200.  20143.   1
  -1  -3   6 584203.  20428.   1
   1   3  -6 608211.  21246.   1
   1   3  -6 584551.  20414.   1
  -1  -3   5  77349. 3331.94   1
  -1  -3   5  75922. 3510.78   1
   1   3  -5  74774. 3433.19   1
   1   3  -5  75713. 3482.95   1
  -1  -3   4  26298. 1935.63   1
  -1  -3   4  29036. 2214.68   1
   1   3  -4  33142. 2307.93   1
   1   3  -4  28114. 2226.86   1
  -1  -3   3  580.38 1546.97   1
  -1  -3   3 3660.40 1806.19   1
   1   3  -3 1790.53 1633.26   1
   1   3  -3 3170.14 1598.12   1
  -1  -3   2  55985. 2775.92   1
  -1  -3   2  49165. 2445.72   1
   1   3  -2  53862. 2644.40   1
   1   3  -2  52470. 2719.55   1
  -1  -3   1  27940. 2028.88   1
  -1  -3   1  30793. 1983.99   1
   1   3  -1  31173. 2018.79   1
   1   3  -1  26886. 2115.52   1
  -1  -3   0  24589. 1851.77   1
  -1  -3   0  19969. 1906.75   1
   1   3   0  24395. 2065.41   1
   1   3   0  23953. 2003.83   1
  -1  -3  -1 1183.71 1527.49   1
  -1  -3  -1 2398.05 1602.29   1
   1   3   1 4422.40 1557.41   1
   1   3   1 7588.72 1598.12   1
  -1  -3  -2   -7.97 1605.77   1
  -1  -3  -2 1300.63 1533.75   1
   1   3   2 -208.21 1819.07   1
   1   3   2  812.80 1600.56   1
  -1  -3  -3  12561. 1927.28   1
  -1  -3  -3  10637. 1703.20   1
   1   3   3  13128. 1810.37   1
   1   3   3 6885.87 2007.65   1
  -1  -3  -4 1105.77 1910.23   1
  -1  -3  -4 -1159.4 1695.54   1
   1   3   4 -495.48 1726.86   1
   1   3   4   42.48 1819.76   1
  -1  -3  -5  14854. 1941.89   1
  -1  -3  -5  11851. 2117.26   1
   1   3   5  13472. 2067.15   1
   1   3   5  14621. 2246.34   1
  -1  -3  -6  34600. 2519.13   1
  -1  -3  -6  35839. 2617.26   1
   1   3   6  37996. 2426.23   1
   1   3   6  41754. 2805.49   1
  -1  -3  -7  25237. 2297.84   1
  -1  -3  -7  30598. 2656.92   1
   1   3   7  24614. 1894.92   1
   1   3   7  25024. 2554.28   1
  -1  -3  -8  47147. 2654.14   1
  -1  -3  -8  46834. 2719.90   1
   1   3   8  46103. 2461.38   1
   1   3   8  46799. 2661.10   1
  -1  -3  -9  61447. 3414.75   1
  -1  -3  -9  55811. 3138.48   1
   1   3   9  57307. 2942.24   1
   1   3   9  61552. 3379.61   1
  -1  -3 -10  11548. 2270.35   1
  -1  -3 -10  14882. 1798.88   1
   1   3  10  10898. 1854.90   1
   1   3  10  12015. 1874.74   1
  -1  -3 -11 1596.73 2143.35   1
  -1  -3 -11 -1048.4 2083.51   1
   1   3  11  907.45 1809.32   1
   1   3  11 -3416.8 2398.40   1
  -1  -3 -12  26479. 2175.71   1
  -1  -3 -12  23737. 1863.26   1
   1   3  12  20501. 2075.50   1
   1   3  12  24833. 2097.08   1
  -1  -3 -13 4015.31 1791.93   1
  -1  -3 -13 -3789.1 2081.42   1
   1   3  13 -889.35 1842.38   1
   1   3  13 -2573.1 1863.26   1
  -1  -3 -14 3123.87 2169.80   1
  -1  -3 -14 4617.25 1930.76   1
   1   3  14 4151.01 1697.98   1
   1   3  14 4711.20 1980.86   1
  -1  -3 -15  24530. 2529.92   1
  -1  -3 -15  22537. 2225.47   1
   1   3  15  24395. 2084.55   1
   1   3  15  24492. 2307.58   1
  -1  -3 -16 1235.56 1665.97   1
  -1  -3 -16 3771.74 2479.47   1
   1   3  16 -1653.8 1934.58   1
   1   3  16 2983.64 1676.41   1
  -1  -3 -17 -2811.8 2425.54   1
  -1  -3 -17 3101.60 2777.66   1
   1   3  17 -3068.9 2405.01   1
   1   3  17 1170.84 2436.67   1
  -1  -3 -18 144154. 6162.14   1
  -1  -3 -18 157516. 6600.55   1
   1   3  18 143598. 6047.31   1
   1   3  18 158246. 6454.41   1
  -1  -3 -19  586.29 2606.12   1
  -1  -3 -19  861.86 1940.15   1
   1   3  19 1834.72 1890.05   1
   1   3  19 2544.88 1850.73   1
  -1  -3 -20  25369. 3267.57   1
  -1  -3 -20  19749. 2952.68   1
   1   3  20  22317. 3063.32   1
   1   3  20  16921. 2778.35   1
  -1  -3 -21 6941.54 2291.23   1
  -1  -3 -21 3507.30 2446.41   1
   1   3  21  164.02 2390.05   1
   1   3  21 -490.26 2473.55   1
  -1  -3 -22 1085.25 2850.03   1
  -1  -3 -22 6635.34 2729.29   1
   1   3  22 5243.56 2775.92   1
   1   3  22 6534.44 2728.25   1
  -1  -3 -23 5681.97 2622.47   1
  -1  -3 -23 -188.52 2662.84   1
   1   3  23 4958.24 2201.81   1
   1   3  23 7139.87 2651.01   1
  -1  -3 -24 7205.98 2867.43   1
  -1  -3 -24 3391.44 2583.85   1
   1   3  24 -2853.5 2710.51   1
   1   3  24 -1118.0 2475.64   1
  -1  -3 -25 -5344.5 2628.39   1
  -1  -3 -25 -2164.6 3084.90   1
   1   3  25 5664.57 2752.26   1
   1   3  25 -1358.7 2323.59   1
  -1  -3 -26  10550. 3286.01   1
  -1  -3 -26 8876.12 2648.92   1
   1   3  26  17404. 2883.78   1
   1   3  26 8190.67 2906.75   1
  -1  -4  27  538.62 3158.31   1
  -1  -4  27 9913.00 3695.19   1
   1   4 -27 -2507.0 2480.51   1
   1   4 -27 4589.42 3569.93   1
  -1  -4  26 5939.45 3256.43   1
  -1  -4  26 1483.65 2421.01   1
   1   4 -26 1186.15 2699.37   1
   1   4 -26 -693.81 2368.13   1
  -1  -4  25 3691.72 3181.63   1
  -1  -4  25 3983.99 2806.19   1
   1   4 -25 7592.20 2297.84   1
   1   4 -25 6308.28 3507.30   1
  -1  -4  24 5476.68 3024.70   1
  -1  -4  24 -705.64 2200.42   1
   1   4 -24 7028.52 2814.19   1
   1   4 -24 -578.64 2403.62   1
  -1  -4  23  13914. 2566.46   1
  -1  -4  23  21715. 3175.01   1
   1   4 -23  17359. 2418.58   1
   1   4 -23  20077. 3636.04   1
  -1  -4  22 -4850.4 2334.72   1
  -1  -4  22 3213.64 2617.95   1
   1   4 -22 -3155.5 2637.78   1
   1   4 -22 2292.62 2951.63   1
  -1  -4  21 -192.66 1943.63   1
  -1  -4  21 -345.82 2529.23   1
   1   4 -21 1966.60 2331.94   1
   1   4 -21  408.14 2232.43   1
  -1  -4  20 1278.36 1844.47   1
  -1  -4  20 3827.41 3144.40   1
   1   4 -20 5535.83 3040.71   1
   1   4 -20 2353.16 2051.15   1
  -1  -4  19 -204.98 2097.08   1
  -1  -4  19 -1806.5 2541.06   1
   1   4 -19 -392.14 2363.60   1
   1   4 -19  476.69 2813.50   1
  -1  -4  18 3070.98 2311.76   1
  -1  -4  18 1276.62 1735.56   1
   1   4 -18 -2262.3 2410.58   1
   1   4 -18 -1353.9 2307.93   1
  -1  -4  17  988.52 1674.67   1
  -1  -4  17 1329.50 2172.23   1
   1   4 -17 -1478.4 2307.93   1
   1   4 -17  672.23 1704.24   1
  -1  -4  16 5734.16 1902.92   1
  -1  -4  16 9251.90 1702.16   1
   1   4 -16 6085.59 1706.33   1
   1   4 -16 8977.03 1643.70   1
  -1  -4  15 -3155.5 1893.53   1
  -1  -4  15 -3796.1 1484.34   1
   1   4 -15   -8.96 1559.50   1
   1   4 -15 2698.68 1733.82   1
  -1  -4  14  403.27 1869.52   1
  -1  -4  14 3275.22 1824.28   1
   1   4 -14 -634.65 1837.85   1
   1   4 -14 -187.75 1921.01   1
  -1  -4  13   30.59 2074.46   1
  -1  -4  13 -1599.2 1915.45   1
   1   4 -13   88.17 1717.47   1
   1   4 -13 -511.83 1889.70   1
  -1  -4  12 1414.75 1810.72   1
  -1  -4  12 3771.74 1554.28   1
   1   4 -12 -1916.5 1709.11   1
   1   4 -12 1850.73 1492.69   1
  -1  -4  11  13274. 2002.78   1
  -1  -4  11  16701. 2139.52   1
   1   4 -11  11632. 1829.85   1
   1   4 -11  15905. 1574.81   1
  -1  -4  10 2246.34 1742.87   1
  -1  -4  10 2864.65 2103.69   1
   1   4 -10  -33.21 1710.16   1
   1   4 -10 -1156.2 1353.86   1
  -1  -4   9 1701.11 1551.49   1
  -1  -4   9 2654.14 1865.69   1
   1   4  -9  976.34 1757.83   1
   1   4  -9 3207.37 1825.68   1
  -1  -4   8 1784.27 1491.65   1
  -1  -4   8  215.24 2085.25   1
   1   4  -8 1667.01 1743.56   1
   1   4  -8 1919.62 1816.63   1
  -1  -4   7  20651. 1970.42   1
  -1  -4   7  24179. 2209.11   1
   1   4  -7  24015. 1967.99   1
   1   4  -7  27978. 2345.16   1
  -1  -4   6 5173.97 1761.31   1
  -1  -4   6 6864.99 1617.95   1
   1   4  -6 6388.30 1809.67   1
   1   4  -6 5699.37 1923.10   1
  -1  -4   5 142380. 5521.92   1
  -1  -4   5 141092. 5455.81   1
   1   4  -5 145407. 5657.61   1
   1   4  -5 146799. 5688.93   1
  -1  -4   4  28062. 2016.00   1
  -1  -4   4  27533. 2104.38   1
   1   4  -4  31239. 2321.50   1
   1   4  -4  28041. 1990.60   1
  -1  -4   3 5201.80 1917.88   1
  -1  -4   3 5626.30 1625.96   1
   1   4  -3 5215.72 1671.54   1
   1   4  -3 2410.23 1772.09   1
  -1  -4   2  20153. 2001.74   1
  -1  -4   2  21093. 2017.05   1
   1   4  -2  22324. 1941.89   1
   1   4  -2  22596. 2257.83   1
  -1  -4   1 4112.73 1750.17   1
  -1  -4   1 5845.51 1789.14   1
   1   4  -1 7720.94 1665.62   1
   1   4  -1 6367.43 1736.25   1
  -1  -4   0  53479. 2839.25   1
  -1  -4   0  52784. 2658.66   1
   1   4   0  51740. 2669.45   1
   1   4   0  53549. 2852.47   1
  -1  -4  -1  81872. 3719.55   1
  -1  -4  -1  81802. 3538.62   1
   1   4   1  84795. 3677.80   1
   1   4   1  83925. 3677.80   1
  -1  -4  -2  32053. 2151.01   1
  -1  -4  -2  30814. 2248.43   1
   1   4   2  31865. 2151.01   1
   1   4   2  30456. 2315.24   1
  -1  -4  -3  42276. 2472.51   1
  -1  -4  -3  41614. 2546.62   1
   1   4   3  43389. 2582.46   1
   1   4   3  43354. 2740.78   1
  -1  -4  -4  15202. 2139.18   1
  -1  -4  -4  12958. 1610.65   1
   1   4   4  15195. 2066.46   1
   1   4   4  14638. 1871.26   1
  -1  -4  -5 163987. 6336.11   1
  -1  -4  -5 157446. 5960.33   1
   1   4   5 146451. 5636.74   1
   1   4   5 160299. 6224.77   1
  -1  -4  -6  46103. 2815.24   1
  -1  -4  -6  45337. 2679.19   1
   1   4   6  40536. 2465.55   1
   1   4   6  45546. 2924.84   1
  -1  -4  -7 3914.40 1877.17   1
  -1  -4  -7 1151.36 1921.36   1
   1   4   7 1224.77 1624.91   1
   1   4   7 5020.87 2165.97   1
  -1  -4  -8 3500.34 1915.45   1
  -1  -4  -8 2261.65 2306.54   1
   1   4   8 3401.88 1767.92   1
   1   4   8 5577.59 2145.79   1
  -1  -4  -9 8576.89 2253.30   1
  -1  -4  -9 8430.75 2140.92   1
   1   4   9 7943.62 1670.14   1
   1   4   9 6287.40 2239.39   1
  -1  -4 -10 4328.46 2085.59   1
  -1  -4 -10 2677.80 2156.92   1
   1   4  10 4154.48 1795.75   1
   1   4  10 2287.40 2224.77   1
  -1  -4 -11  30672. 2678.49   1
  -1  -4 -11  29753. 2645.44   1
   1   4  11  25477. 2173.97   1
   1   4  11  29388. 2732.43   1
  -1  -4 -12  -73.76 2083.85   1
  -1  -4 -12 1226.86 1498.95   1
   1   4  12 3980.51 1686.85   1
   1   4  12  440.50 1787.75   1
  -1  -4 -13 -196.66 1529.23   1
  -1  -4 -13 2608.56 2049.75   1
   1   4  13 2369.52 1708.07   1
   1   4  13 3367.43 2336.46   1
  -1  -4 -14 1567.50 2228.25   1
  -1  -4 -14 -818.02 2183.71   1
   1   4  14  427.28 1842.38   1
   1   4  14 3750.87 2446.41   1
  -1  -4 -15   74.08 2181.28   1
  -1  -4 -15 -677.45 2208.42   1
   1   4  15 3702.15 1703.55   1
   1   4  15 1451.29 2429.36   1
  -1  -4 -16  925.19 2162.84   1
  -1  -4 -16 6569.24 2417.88   1
   1   4  16 4843.42 1808.63   1
   1   4  16 7564.36 2541.06   1
  -1  -4 -17  12272. 2423.45   1
  -1  -4 -17 9533.74 2715.03   1
   1   4  17  11750. 1981.56   1
   1   4  17  10793. 2663.18   1
  -1  -4 -18 -3702.2 2840.99   1
  -1  -4 -18 -4519.8 2531.31   1
   1   4  18 2062.28 1943.98   1
   1   4  18 -952.33 2678.15   1
  -1  -4 -19 2802.71 2635.00   1
  -1  -4 -19 4244.95 2950.94   1
   1   4  19 5243.56 2495.47   1
   1   4  19   40.47 2516.00   1
  -1  -4 -20  860.82 3014.96   1
  -1  -4 -20 2714.33 2026.09   1
   1   4  20 4947.80 1986.78   1
   1   4  20 2284.62 2606.47   1
  -1  -4 -21 3667.36 2604.03   1
  -1  -4 -21 6433.54 2940.50   1
   1   4  21 6847.59 2527.14   1
   1   4  21 5911.62 2718.86   1
  -1  -4 -22 -790.54 3039.31   1
  -1  -4 -22 4700.76 2687.54   1
   1   4  22 2010.78 2520.87   1
   1   4  22 3629.08 2831.94   1
  -1  -4 -23 5925.53 2198.68   1
  -1  -4 -23 6231.73 2683.37   1
   1   4  23 1581.77 2725.12   1
   1   4  23 5574.11 2128.04   1
  -1  -4 -24 5250.52 3160.05   1
  -1  -4 -24 -2422.4 3255.04   1
   1   4  24 -2452.3 2557.06   1
   1   4  24 -4672.9 2705.63   1
  -1  -4 -25 5497.56 2804.45   1
  -1  -4 -25 3712.59 1923.45   1
   1   4  25 6165.62 2345.51   1
   1   4  25  -71.29 1985.73   1
  -1  -5  26 -1385.5 3419.97   1
  -1  -5  26 -4523.3 3068.54   1
   1   5 -26 -888.66 2748.43   1
   1   5 -26 -3949.2 3489.91   1
  -1  -5  25 5069.58 2200.76   1
  -1  -5  25 3674.32 3100.21   1
   1   5 -25 1607.86 2455.11   1
   1   5 -25 4116.21 2462.77   1
  -1  -5  24  17937. 2645.09   1
  -1  -5  24  15452. 3010.78   1
   1   5 -24  16608. 3531.66   1
   1   5 -24  22919. 2744.95   1
  -1  -5  23 3373.69 2983.64   1
  -1  -5  23 -2974.6 2601.60   1
   1   5 -23 2004.87 2585.24   1
   1   5 -23 -2274.2 3237.99   1
  -1  -5  22  13114. 2999.65   1
  -1  -5  22  10449. 2109.25   1
   1   5 -22  16750. 2517.74   1
   1   5 -22  13048. 3049.75   1
  -1  -5  21 7686.14 2459.29   1
  -1  -5  21 6684.06 2585.24   1
   1   5 -21 6670.14 1909.18   1
   1   5 -21 4234.51 2696.94   1
  -1  -5  20  10188. 2615.17   1
  -1  -5  20  12143. 2757.13   1
   1   5 -20 6447.45 2165.27   1
   1   5 -20  10665. 2921.71   1
  -1  -5  19  17714. 2714.68   1
  -1  -5  19  11489. 2734.86   1
   1   5 -19  19318. 2322.20   1
   1   5 -19  13998. 2806.54   1
  -1  -5  18 2427.97 2654.14   1
  -1  -5  18 -328.64 2371.95   1
   1   5 -18 3297.84 1701.81   1
   1   5 -18 3806.54 2567.15   1
  -1  -5  17  32484. 2926.58   1
  -1  -5  17  31914. 3017.39   1
   1   5 -17  27474. 2664.92   1
   1   5 -17  27961. 2739.73   1
  -1  -5  16  69207. 3796.10   1
  -1  -5  16  59986. 3542.10   1
   1   5 -16  59325. 3320.46   1
   1   5 -16  57759. 3292.97   1
  -1  -5  15 2291.93 2042.45   1
  -1  -5  15 1662.84 1825.33   1
   1   5 -15 4154.48 1640.57   1
   1   5 -15 4488.51 1748.78   1
  -1  -5  14  41580. 2746.00   1
  -1  -5  14  40919. 2366.73   1
   1   5 -14  40814. 2356.30   1
   1   5 -14  46068. 2622.47   1
  -1  -5  13  11830. 2487.12   1
  -1  -5  13  13605. 1893.18   1
   1   5 -13  11510. 1842.73   1
   1   5 -13  15337. 1951.63   1
  -1  -5  12  60786. 3121.43   1
  -1  -5  12  63848. 3351.77   1
   1   5 -12  62596. 3199.02   1
   1   5 -12  60995. 2958.59   1
  -1  -5  11 6983.29 1860.47   1
  -1  -5  11 7223.38 1900.83   1
   1   5 -11 3910.92 1939.46   1
   1   5 -11 5608.90 1943.98   1
  -1  -5  10  825.33 1852.82   1
  -1  -5  10  789.14 1554.28   1
   1   5 -10 1033.05 1955.81   1
   1   5 -10 -340.47 1640.92   1
  -1  -5   9 8288.09 2077.94   1
  -1  -5   9 8002.78 1751.22   1
   1   5  -9  11493. 1934.93   1
   1   5  -9 9495.47 1932.50   1
  -1  -5   8  11952. 1832.29   1
  -1  -5   8 9422.40 1906.75   1
   1   5  -8  12592. 1908.49   1
   1   5  -8  14137. 1981.21   1
  -1  -5   7 -958.25 1660.75   1
  -1  -5   7 -2246.3 1712.59   1
   1   5  -7 -3761.3 1717.47   1
   1   5  -7  485.39 1786.01   1
  -1  -5   6  21113. 1901.88   1
  -1  -5   6  19850. 2136.39   1
   1   5  -6  25264. 2348.29   1
   1   5  -6  19273. 1992.69   1
  -1  -5   5  17046. 1869.87   1
  -1  -5   5  18326. 1876.48   1
   1   5  -5  15024. 1903.96   1
   1   5  -5  17293. 2082.46   1
  -1  -5   4  48887. 2677.80   1
  -1  -5   4  46729. 2583.85   1
   1   5  -4  46486. 2560.54   1
   1   5  -4  47112. 2735.21   1
  -1  -5   3  33138. 2288.45   1
  -1  -5   3  27202. 2104.03   1
   1   5  -3  28104. 2068.89   1
   1   5  -3  24193. 2120.39   1
  -1  -5   2 110682. 4464.16   1
  -1  -5   2 110717. 4498.95   1
   1   5  -2 115866. 4606.81   1
   1   5  -2 107829. 4519.83   1
  -1  -5   1 103027. 4203.20   1
  -1  -5   1 101218. 4265.83   1
   1   5  -1  97251. 4064.02   1
   1   5  -1  94154. 3990.95   1
  -1  -5   0  64022. 3172.23   1
  -1  -5   0  64579. 3028.88   1
   1   5   0  62596. 3046.27   1
   1   5   0  68163. 3157.97   1
  -1  -5  -1  35560. 2370.56   1
  -1  -5  -1  38553. 2378.91   1
   1   5   1  34294. 2248.08   1
   1   5   1  39666. 2435.98   1
  -1  -5  -2  33848. 2473.21   1
  -1  -5  -2  31437. 2183.02   1
   1   5   2  33121. 2216.42   1
   1   5   2  34280. 2445.37   1
  -1  -5  -3  14349. 1886.22   1
  -1  -5  -3  15438. 1904.31   1
   1   5   3  15828. 1837.16   1
   1   5   3  15901. 2167.01   1
  -1  -5  -4 3590.81 1738.34   1
  -1  -5  -4 -1614.5 1785.31   1
   1   5   4  747.74 1609.60   1
   1   5   4 -1622.1 2077.24   1
  -1  -5  -5 125957. 5041.75   1
  -1  -5  -5 122095. 4864.30   1
   1   5   5 124530. 4996.52   1
   1   5   5 118928. 4832.98   1
  -1  -5  -6 9064.01 1930.76   1
  -1  -5  -6 9318.01 1882.74   1
   1   5   6 9909.52 1794.71   1
   1   5   6  11458. 2191.72   1
  -1  -5  -7  11430. 2191.02   1
  -1  -5  -7  19095. 2167.36   1
   1   5   7  13072. 1885.87   1
   1   5   7  11482. 2224.42   1
  -1  -5  -8  33980. 2534.10   1
  -1  -5  -8  35978. 2230.34   1
   1   5   8  33406. 2507.30   1
   1   5   8  34193. 2372.30   1
  -1  -5  -9  26489. 2371.26   1
  -1  -5  -9  23358. 2459.98   1
   1   5   9  22763. 2109.25   1
   1   5   9  25731. 2252.96   1
  -1  -5 -10 6120.38 2058.11   1
  -1  -5 -10 5953.37 2196.59   1
   1   5  10 5977.73 1617.60   1
   1   5  10 2827.42 2040.01   1
  -1  -5 -11  54210. 3115.52   1
  -1  -5 -11  55845. 3189.63   1
   1   5  11  56959. 2969.38   1
   1   5  11  55706. 2866.04   1
  -1  -5 -12 3625.61 2201.11   1
  -1  -5 -12 5935.97 1678.15   1
   1   5  12 3121.43 1819.76   1
   1   5  12  810.37 2048.71   1
  -1  -5 -13  23212. 2340.29   1
  -1  -5 -13  22822. 2429.71   1
   1   5  13  25063. 2101.60   1
   1   5  13  22752. 2583.16   1
  -1  -5 -14 7112.03 2318.37   1
  -1  -5 -14 9585.93 2348.99   1
   1   5  14 6179.54 1956.50   1
   1   5  14 6457.89 2778.35   1
  -1  -5 -15  42902. 2856.64   1
  -1  -5 -15  32926. 3000.69   1
   1   5  15  39074. 2802.36   1
   1   5  15  38518. 3128.04   1
  -1  -5 -16 2511.13 2766.18   1
  -1  -5 -16 -539.67 1820.81   1
   1   5  16 1940.50 2379.26   1
   1   5  16 -3931.8 2330.55   1
  -1  -5 -17 1878.91 2907.44   1
  -1  -5 -17 3583.85 1973.21   1
   1   5  17  608.21 2423.10   1
   1   5  17 6214.33 1987.12   1
  -1  -5 -18 3431.45 3083.85   1
  -1  -5 -18 5048.71 2371.61   1
   1   5  18 -556.37 2556.02   1
   1   5  18 2441.54 2241.47   1
  -1  -5 -19  -25.97 2336.11   1
  -1  -5 -19  133.44 3134.30   1
   1   5  19 1289.49 2601.95   1
   1   5  19 -1302.4 2588.38   1
  -1  -5 -20  10254. 3282.88   1
  -1  -5 -20 7251.21 2941.54   1
   1   5  20 5741.12 2716.77   1
   1   5  20  10066. 2914.75   1
  -1  -5 -21 1906.75 2935.28   1
  -1  -5 -21 5636.74 2875.78   1
   1   5  21  885.52 2600.55   1
   1   5  21 3778.70 2924.14   1
  -1  -5 -22 1462.77 2049.75   1
  -1  -5 -22  695.89 2969.03   1
   1   5  22 1207.03 2333.33   1
   1   5  22 -780.10 2534.10   1
  -1  -5 -23  370.91 2722.68   1
  -1  -5 -23 -2436.0 3232.43   1
   1   5  23 -730.69 2719.90   1
   1   5  23 1397.35 2490.26   1
  -1  -5 -24 -228.11 3133.96   1
  -1  -5 -24 -4363.3 2910.57   1
   1   5  24 -237.51 2917.53   1
   1   5  24 -1920.3 2767.92   1
  -1  -5 -25 3115.17 3453.02   1
   1   5  25  10209. 3234.17   1
   1   5  25  640.57 2432.84   1
  -1  -6  26  154.94 2696.24   1
  -1  -6  26 4342.38 3117.60   1
   1   6 -26 -4276.3 3149.96   1
   1   6 -26 -198.96 2721.99   1
  -1  -6  25 9345.85 3082.46   1
  -1  -6  25 9457.19 3052.89   1
   1   6 -25  11785. 3454.07   1
   1   6 -25 9899.09 3482.95   1
  -1  -6  24 3709.11 2993.04   1
  -1  -6  24 1769.31 2066.46   1
   1   6 -24 -537.58 2489.21   1
   1   6 -24 -4547.7 2932.15   1
  -1  -6  23 -108.73 2458.24   1
  -1  -6  23 4199.72 1892.83   1
   1   6 -23 1625.26 2347.60   1
   1   6 -23 1731.38 2582.11   1
  -1  -6  22 -130.48 2627.00   1
  -1  -6  22  307.62 2480.51   1
   1   6 -22 -4412.0 2979.12   1
   1   6 -22 4450.24 2205.29   1
  -1  -6  21  17443. 2798.88   1
  -1  -6  21  19680. 2379.26   1
   1   6 -21  19603. 3087.33   1
   1   6 -21  20891. 2485.73   1
  -1  -6  20 2945.72 2375.43   1
  -1  -6  20   18.78 2542.45   1
   1   6 -20 1308.63 2046.97   1
   1   6 -20 2643.70 2890.05   1
  -1  -6  19  56472. 3489.91   1
  -1  -6  19  52505. 3496.87   1
   1   6 -19  47738. 3426.93   1
   1   6 -19  52818. 3387.96   1
  -1  -6  18 2082.11 2506.61   1
  -1  -6  18 -1574.5 2769.31   1
   1   6 -18 -674.67 2439.80   1
   1   6 -18 -6075.2 2616.56   1
  -1  -6  17 7091.16 2693.46   1
  -1  -6  17 4645.09 2251.22   1
   1   6 -17  12129. 2465.55   1
   1   6 -17 6325.67 2597.77   1
  -1  -6  16 -612.39 2366.39   1
  -1  -6  16 4784.27 2242.86   1
   1   6 -16  -91.41 1877.87   1
   1   6 -16 2537.23 2494.43   1
  -1  -6  15  14384. 2028.18   1
  -1  -6  15  14231. 1871.61   1
   1   6 -15  16733. 2100.90   1
   1   6 -15  13653. 2098.47   1
  -1  -6  14 9836.46 2273.14   1
  -1  -6  14 6336.11 1825.68   1
   1   6 -14  10244. 1910.23   1
   1   6 -14 5000.00 2061.58   1
  -1  -6  13  47182. 2735.56   1
  -1  -6  13  37926. 2504.52   1
   1   6 -13  41580. 2427.28   1
   1   6 -13  44259. 2744.60   1
  -1  -6  12  84655. 3844.81   1
  -1  -6  12  81315. 3729.99   1
   1   6 -12  81872. 3848.29   1
   1   6 -12  79993. 3446.06   1
  -1  -6  11  14440. 1916.14   1
  -1  -6  11  11935. 2126.30   1
   1   6 -11  16733. 1965.20   1
   1   6 -11  14638. 2049.75   1
  -1  -6  10 9394.56 1839.25   1
  -1  -6  10  11726. 1834.03   1
   1   6 -10 6148.22 1355.60   1
   1   6 -10 8023.65 1952.68   1
  -1  -6   9 9321.49 1690.67   1
  -1  -6   9 5918.57 1638.13   1
   1   6  -9  10122. 1846.21   1
   1   6  -9 4933.89 1875.78   1
  -1  -6   8  22363. 2030.27   1
  -1  -6   8  22119. 2176.06   1
   1   6  -8  18754. 1919.97   1
   1   6  -8  22770. 2032.01   1
  -1  -6   7 6642.30 1680.58   1
  -1  -6   7 4074.46 1916.14   1
   1   6  -7 2616.56 1748.78   1
   1   6  -7 4652.05 1741.13   1
  -1  -6   6  10668. 1921.71   1
  -1  -6   6  14311. 1833.33   1
   1   6  -6  18079. 2005.22   1
   1   6  -6  14154. 2002.78   1
  -1  -6   5  57202. 2884.83   1
  -1  -6   5  54419. 2934.58   1
   1   6  -5  48504. 2592.90   1
   1   6  -5  50800. 2775.22   1
  -1  -6   4  129.54 1706.68   1
  -1  -6   4 4815.58 1794.01   1
   1   6  -4 2925.54 1768.27   1
   1   6  -4 2557.76 1670.49   1
  -1  -6   3  27474. 2138.83   1
  -1  -6   3  31719. 2171.19   1
   1   6  -3  23887. 1953.37   1
   1   6  -3  23800. 2213.64   1
  -1  -6   2 138622. 5434.93   1
  -1  -6   2 137509. 5351.42   1
   1   6  -2 133229. 5187.89   1
   1   6  -2 135630. 5368.82   1
  -1  -6   1  23681. 2001.39   1
  -1  -6   1  22839. 2084.55   1
   1   6  -1  26903. 2028.53   1
   1   6  -1  23469. 2055.67   1
  -1  -6   0 5090.46 1804.45   1
  -1  -6   0 2157.97 1651.01   1
   1   6   0 2981.90 1583.51   1
   1   6   0 5685.45 1716.07   1
  -1  -6  -1 5762.00 1794.01   1
  -1  -6  -1 4279.75 1698.33   1
   1   6   1 3194.15 1640.92   1
   1   6   1 2586.64 1886.57   1
  -1  -6  -2 5187.89 1633.96   1
  -1  -6  -2 2847.25 1965.90   1
   1   6   2 6764.08 1692.76   1
   1   6   2 3040.36 1986.78   1
  -1  -6  -3  228.71 1662.84   1
  -1  -6  -3  869.17 1680.58   1
   1   6   3 1091.51 1628.04   1
   1   6   3 1733.12 1959.98   1
  -1  -6  -4  26552. 2176.76   1
  -1  -6  -4  29736. 2194.15   1
   1   6   4  29419. 2474.95   1
   1   6   4  28031. 2082.81   1
  -1  -6  -5 -243.77 1749.82   1
  -1  -6  -5 -488.52 1708.42   1
   1   6   5 -3012.2 1581.77   1
   1   6   5  900.83 1899.09   1
  -1  -6  -6 1392.83 1764.44   1
  -1  -6  -6  870.21 1792.62   1
   1   6   6 1099.16 1658.66   1
   1   6   6 1358.38 2010.78   1
  -1  -6  -7  56576. 2827.42   1
  -1  -6  -7  51809. 2950.94   1
   1   6   7  58281. 2999.65   1
   1   6   7  57481. 3031.66   1
  -1  -6  -8  41371. 2611.34   1
  -1  -6  -8  47599. 2890.05   1
   1   6   8  44085. 2661.10   1
   1   6   8  40919. 2807.93   1
  -1  -6  -9 -167.75 1910.92   1
  -1  -6  -9  761.66 1970.77   1
   1   6   9 1953.37 1773.83   1
   1   6   9 -3390.7 2106.12   1
  -1  -6 -10 6471.81 2159.01   1
  -1  -6 -10 6116.90 1985.38   1
   1   6  10 2530.96 1709.81   1
   1   6  10 6196.93 2195.20   1
  -1  -6 -11  26148. 2588.38   1
  -1  -6 -11  28702. 2518.44   1
   1   6  11  25219. 2221.64   1
   1   6  11  27895. 2675.36   1
  -1  -6 -12 1646.83 2043.49   1
  -1  -6 -12  834.72 2176.41   1
   1   6  12 1130.48 2306.19   1
   1   6  12 1130.83 1836.12   1
  -1  -6 -13  35386. 2950.59   1
  -1  -6 -13  29294. 2594.29   1
   1   6  13  36186. 2779.75   1
   1   6  13  36395. 3090.12   1
  -1  -6 -14  35525. 3183.71   1
  -1  -6 -14  36569. 2533.05   1
   1   6  14  36256. 2696.94   1
   1   6  14  34106. 2753.30   1
  -1  -6 -15 4585.94 2585.59   1
  -1  -6 -15 8883.08 2883.78   1
   1   6  15 3474.94 2343.42   1
   1   6  15  908.84 3018.44   1
  -1  -6 -16  22276. 3162.84   1
  -1  -6 -16  26489. 3071.67   1
   1   6  16  20710. 2547.67   1
   1   6  16  24916. 3343.42   1
  -1  -6 -17 2330.20 2911.62   1
  -1  -6 -17 1254.00 2683.37   1
   1   6  17 3246.34 2637.09   1
   1   6  17  229.19 2825.33   1
  -1  -6 -18 1382.04 2566.80   1
  -1  -6 -18 -4262.3 3110.99   1
   1   6  18 -1557.4 2671.88   1
   1   6  18 -624.56 2736.60   1
  -1  -6 -19  219.07 2748.78   1
  -1  -6 -19 -527.14 3210.50   1
   1   6  19 3373.34 2651.01   1
   1   6  19 4624.21 2842.73   1
  -1  -6 -20 1313.50 3219.90   1
  -1  -6 -20 -1857.3 2891.09   1
   1   6  20 -1529.2 3008.35   1
   1   6  20 2655.18 2675.01   1
  -1  -6 -21 4655.53 3129.78   1
  -1  -6 -21 4234.51 2845.86   1
   1   6  21 6830.20 2744.26   1
   1   6  21 2850.38 2937.02   1
  -1  -6 -22  14875. 3286.71   1
  -1  -6 -22 7240.77 2796.10   1
   1   6  22  14402. 2871.60   1
   1   6  22 8141.95 2607.51   1
  -1  -6 -23  241.86 2161.10   1
  -1  -6 -23 4718.16 3139.18   1
   1   6  23 1342.03 2857.69   1
   1   6  23 1313.85 2458.94   1
  -1  -6 -24 9053.58 3471.12   1
  -1  -6 -24 4916.49 2645.09   1
   1   6  24 5198.32 3209.81   1
   1   6  24 4526.79 2917.53   1
  -1  -7  25 1186.15 2692.76   1
  -1  -7  25 9540.70 3175.01   1
   1   7 -25 1255.39 3395.26   1
   1   7 -25 4558.10 2730.34   1
  -1  -7  24  -96.59 2804.10   1
  -1  -7  24 5504.52 2834.72   1
   1   7 -24 -123.45 3171.19   1
   1   7 -24 2508.35 3221.29   1
  -1  -7  23 3674.32 2453.37   1
  -1  -7  23  905.71 2818.02   1
   1   7 -23 7254.69 3174.32   1
   1   7 -23 4784.27 3031.66   1
  -1  -7  22 5956.85 2782.18   1
  -1  -7  22 8274.17 1875.09   1
   1   7 -22  12244. 3156.57   1
   1   7 -22 7125.95 2702.15   1
  -1  -7  21 2994.08 2677.45   1
  -1  -7  21 8604.72 2020.18   1
   1   7 -21 7400.83 1997.56   1
   1   7 -21 7519.13 3065.06   1
  -1  -7  20 -1374.4 1965.20   1
  -1  -7  20 2629.43 1904.66   1
   1   7 -20 -3521.2 1822.89   1
   1   7 -20  630.83 2556.71   1
  -1  -7  19 3757.83 1940.50   1
  -1  -7  19 6798.88 2566.46   1
   1   7 -19 5929.01 1883.78   1
   1   7 -19 1732.77 2413.36   1
  -1  -7  18 3949.20 2595.68   1
  -1  -7  18 6492.69 1836.81   1
   1   7 -18 7411.27 2307.93   1
   1   7 -18 1524.01 2734.17   1
  -1  -7  17  816.28 2291.58   1
  -1  -7  17  105.01 2262.00   1
   1   7 -17 -3517.7 2273.48   1
   1   7 -17 3237.99 2404.31   1
  -1  -7  16 -3688.2 2607.86   1
  -1  -7  16 2609.60 2143.35   1
   1   7 -16 -1258.2 2288.10   1
   1   7 -16   21.29 2538.27   1
  -1  -7  15   43.56 2093.25   1
  -1  -7  15  -34.22 2317.67   1
   1   7 -15 1760.96 1481.56   1
   1   7 -15 5508.00 2495.47   1
  -1  -7  14  51287. 3194.15   1
  -1  -7  14  60578. 3437.71   1
   1   7 -14  56298. 3528.18   1
   1   7 -14  61795. 3265.13   1
  -1  -7  13  46486. 2783.92   1
  -1  -7  13  50835. 2928.32   1
   1   7 -13  48991. 2761.65   1
   1   7 -13  46903. 2946.41   1
  -1  -7  12  22968. 2197.63   1
  -1  -7  12  27383. 2414.75   1
   1   7 -12  28786. 2163.88   1
   1   7 -12  27276. 2553.58   1
  -1  -7  11  10846. 2066.46   1
  -1  -7  11  14422. 1997.91   1
   1   7 -11  13267. 1956.85   1
   1   7 -11  13170. 2020.88   1
  -1  -7  10 -724.77 1637.09   1
  -1  -7  10  650.66 1846.90   1
   1   7 -10 -240.33 1680.93   1
   1   7 -10 -2211.5 1752.26   1
  -1  -7   9 9255.38 1881.70   1
  -1  -7   9  10264. 1748.78   1
   1   7  -9 8152.39 1624.91   1
   1   7  -9 7860.12 1792.62   1
  -1  -7   8  22432. 2001.04   1
  -1  -7   8  19739. 2002.09   1
   1   7  -8  20164. 2006.26   1
   1   7  -8  20188. 2088.03   1
  -1  -7   7 7773.13 1780.10   1
  -1  -7   7 9763.39 1884.13   1
   1   7  -7 6600.55 1719.21   1
   1   7  -7  11221. 2021.22   1
  -1  -7   6  11440. 1963.46   1
  -1  -7   6  12241. 1888.66   1
   1   7  -6  12742. 2153.09   1
   1   7  -6  11799. 1868.47   1
  -1  -7   5  47738. 2744.26   1
  -1  -7   5  50557. 2750.17   1
   1   7  -5  48399. 2633.26   1
   1   7  -5  44607. 2826.37   1
  -1  -7   4 8500.34 1827.76   1
  -1  -7   4 8375.08 1837.51   1
   1   7  -4  10647. 1771.40   1
   1   7  -4 9300.62 1874.74   1
  -1  -7   3  31590. 2230.69   1
  -1  -7   3  27745. 2220.25   1
   1   7  -3  29144. 2129.43   1
   1   7  -3  30825. 2320.46   1
  -1  -7   2  14443. 1892.48   1
  -1  -7   2  11461. 1767.92   1
   1   7  -2  12516. 1776.62   1
   1   7  -2  13521. 1910.58   1
  -1  -7   1  58351. 2997.56   1
  -1  -7   1  55150. 2819.76   1
   1   7  -1  56228. 2823.59   1
   1   7  -1  54662. 2886.57   1
  -1  -7   0 3556.02 1694.50   1
  -1  -7   0 1857.69 1778.70   1
   1   7   0  568.20 1578.63   1
   1   7   0 1863.60 1798.88   1
  -1  -7  -1  25275. 2142.66   1
  -1  -7  -1  30296. 2318.72   1
   1   7   1  22561. 1971.12   1
   1   7   1  28372. 2394.57   1
  -1  -7  -2 6743.21 2053.58   1
  -1  -7  -2 6614.47 1834.72   1
   1   7   2 8169.79 1969.03   1
   1   7   2 3503.82 1657.27   1
  -1  -7  -3 1101.25 1755.04   1
  -1  -7  -3 2209.11 1760.61   1
   1   7   3 -1258.2 1574.11   1
   1   7   3 1521.92 2020.53   1
  -1  -7  -4 102610. 4439.80   1
  -1  -7  -4  99095. 4213.64   1
   1   7   4  95929. 4064.02   1
   1   7   4 105289. 4610.29   1
  -1  -7  -5 9168.40 1825.68   1
  -1  -7  -5  12262. 1880.65   1
   1   7   5  10035. 1776.96   1
   1   7   5  11239. 1959.98   1
  -1  -7  -6 9123.17 1873.35   1
  -1  -7  -6 9398.04 1584.90   1
   1   7   6 7296.44 1777.66   1
   1   7   6 9380.65 2019.83   1
  -1  -7  -7  642.31 1696.94   1
  -1  -7  -7 2266.18 1826.37   1
   1   7   7 -287.37 1582.11   1
   1   7   7 3789.14 2041.06   1
  -1  -7  -8 8002.78 1987.47   1
  -1  -7  -8 4206.68 2018.09   1
   1   7   8 4123.17 1765.48   1
   1   7   8 5163.53 2155.88   1
  -1  -7  -9  15849. 2038.62   1
  -1  -7  -9  12303. 2002.09   1
   1   7   9  16628. 1889.70   1
   1   7   9  12119. 2320.80   1
  -1  -7 -10 2989.91 1909.88   1
  -1  -7 -10 3232.08 2081.42   1
   1   7  10 2194.15 2285.66   1
   1   7  10 -677.45 1809.32   1
  -1  -7 -11 3956.15 1964.51   1
  -1  -7 -11 6388.30 2432.50   1
   1   7  11 1887.96 1703.90   1
   1   7  11 5619.34 2387.26   1
  -1  -7 -12   38.97 2209.46   1
  -1  -7 -12 -1882.4 2251.22   1
   1   7  12 1204.59 2081.77   1
   1   7  12 4237.99 1861.52   1
  -1  -7 -13 2345.16 2582.46   1
  -1  -7 -13  311.76 2458.59   1
   1   7  13 2607.86 2152.05   1
   1   7  13  539.67 2882.04   1
  -1  -7 -14 -2723.0 2753.65   1
  -1  -7 -14 -1290.2 1905.01   1
   1   7  14 5932.49 2253.30   1
   1   7  14 1366.39 2056.37   1
  -1  -7 -15  223.52 2709.81   1
  -1  -7 -15 -282.64 2737.30   1
   1   7  15 -3313.1 2483.30   1
   1   7  15  386.57 3083.85   1
  -1  -7 -16  22662. 2952.33   1
  -1  -7 -16  17237. 3098.47   1
   1   7  16  19885. 2682.67   1
  -1  -7 -17 -1687.5 2243.56   1
  -1  -7 -17 -4071.0 2910.57   1
   1   7  17  356.30 2616.56   1
   1   7  17 -3949.2 3028.18   1
  -1  -7 -18 1405.71 3124.56   1
  -1  -7 -18 -288.20 2381.00   1
   1   7  18 2017.40 2655.18   1
   1   7  18 2825.68 2559.15   1
  -1  -7 -19 9700.76 3217.12   1
  -1  -7 -19 7602.64 2479.82   1
   1   7  19 7505.21 2541.75   1
   1   7  19 7052.88 2641.96   1
  -1  -7 -20 2913.71 3045.93   1
  -1  -7 -20  289.67 2611.34   1
   1   7  20 -3146.8 2335.42   1
   1   7  20 2280.10 2710.85   1
  -1  -7 -21 5121.78 3092.20   1
  -1  -7 -21 5911.62 3165.97   1
   1   7  21 8155.87 2669.10   1
   1   7  21  16399. 3078.29   1
  -1  -7 -22 -461.38 3198.33   1
  -1  -7 -22 3726.51 3284.62   1
   1   7  22 4018.79 2823.59   1
   1   7  22 -714.68 2886.57   1
  -1  -7 -23 -2505.2 3276.96   1
  -1  -7 -23 -2006.3 2820.11   1
   1   7  23 -2927.3 3209.81   1
   1   7  23 5532.35 2932.50   1
  -1  -8  25  486.08 2999.65   1
  -1  -8  25 -1438.4 3038.27   1
   1   8 -25 -1428.3 3341.33   1
   1   8 -25 -1234.5 3040.01   1
  -1  -8  24  703.55 2896.31   1
  -1  -8  24 7922.75 3036.18   1
   1   8 -24 2721.29 3117.95   1
   1   8 -24 4324.98 3367.78   1
  -1  -8  23  545.58 2935.63   1
  -1  -8  23  -36.01 2636.74   1
   1   8 -23 2648.92 3264.44   1
   1   8 -23 -1816.3 2908.49   1
  -1  -8  22  24962. 3156.92   1
  -1  -8  22  27345. 2728.95   1
   1   8 -22  23845. 3172.58   1
   1   8 -22  26458. 3193.11   1
  -1  -8  21 6631.87 2865.69   1
  -1  -8  21  11482. 2402.57   1
   1   8 -21  14499. 2736.60   1
   1   8 -21 4244.95 2922.06   1
  -1  -8  20  413.36 2447.81   1
  -1  -8  20 -2101.6 2538.27   1
   1   8 -20 4029.22 2369.52   1
   1   8 -20 1912.32 2895.27   1
  -1  -8  19  500.35 2426.23   1
  -1  -8  19 2265.48 2243.91   1
   1   8 -19 -2932.8 2312.80   1
   1   8 -19 1108.91 2909.53   1
  -1  -8  18  507.65 2526.79   1
  -1  -8  18 5539.31 2571.33   1
   1   8 -18 3354.90 2463.46   1
   1   8 -18 1951.29 2699.72   1
  -1  -8  17 3162.84 2681.28   1
  -1  -8  17 -414.40 2439.11   1
   1   8 -17 6343.07 2422.06   1
   1   8 -17  530.27 2524.01   1
  -1  -8  16  18062. 2490.26   1
  -1  -8  16  14022. 2412.32   1
   1   8 -16  15814. 1858.73   1
   1   8 -16  14756. 2506.26   1
  -1  -8  15 131698. 5431.45   1
  -1  -8  15 131385. 5577.59   1
   1   8 -15 146277. 6169.10   1
   1   8 -15 141371. 5786.35   1
  -1  -8  14 170737. 6722.33   1
  -1  -8  14 166110. 6663.18   1
   1   8 -14 168163. 6492.69   1
   1   8 -14 175539. 6986.77   1
  -1  -8  13  39527. 2844.46   1
  -1  -8  13  35456. 2654.14   1
   1   8 -13  39179. 2735.56   1
   1   8 -13  32258. 2877.17   1
  -1  -8  12  15115. 1710.16   1
  -1  -8  12  13939. 1915.45   1
   1   8 -12  18072. 1956.50   1
   1   8 -12  10752. 2097.08   1
  -1  -8  11  36012. 2495.13   1
  -1  -8  11  34346. 2370.21   1
   1   8 -11  33664. 2175.71   1
   1   8 -11  34899. 2534.10   1
  -1  -8  10 3702.15 1790.19   1
  -1  -8  10 -899.79 1729.99   1
   1   8 -10 3705.63 1556.71   1
   1   8 -10 1978.77 1897.01   1
  -1  -8   9  44085. 2575.85   1
  -1  -8   9  34478. 2409.18   1
   1   8  -9  38100. 2280.44   1
   1   8  -9  35769. 2511.48   1
  -1  -8   8  15181. 1756.78   1
  -1  -8   8  13222. 1959.64   1
   1   8  -8  14370. 1700.76   1
   1   8  -8  14732. 2050.10   1
  -1  -8   7  15181. 1940.15   1
  -1  -8   7  17898. 1945.02   1
   1   8  -7  15397. 2069.94   1
   1   8  -7  16019. 1993.39   1
  -1  -8   6  63918. 3209.46   1
  -1  -8   6  63639. 3247.04   1
   1   8  -6  70946. 3329.50   1
   1   8  -6  72338. 3514.26   1
  -1  -8   5 -3164.6 1741.13   1
  -1  -8   5 2375.78 1672.23   1
   1   8  -5 1068.20 1665.62   1
   1   8  -5 2732.77 1922.75   1
  -1  -8   4  22617. 2039.66   1
  -1  -8   4  17985. 2009.39   1
   1   8  -4  19426. 1966.25   1
   1   8  -4  20132. 2250.52   1
  -1  -8   3  30525. 2284.97   1
  -1  -8   3  33838. 2224.42   1
   1   8  -3  35734. 2312.45   1
   1   8  -3  33779. 2374.74   1
  -1  -8   2  15734. 1951.63   1
  -1  -8   2  13800. 1848.29   1
   1   8  -2  16155. 1766.53   1
   1   8  -2  13633. 2110.30   1
  -1  -8   1  13218. 1892.83   1
  -1  -8   1  18751. 2009.74   1
   1   8  -1  12276. 1782.88   1
   1   8  -1  18566. 1944.33   1
  -1  -8   0  15616. 1948.50   1
  -1  -8   0  16496. 2049.06   1
   1   8   0  13834. 1803.76   1
   1   8   0  13869. 1951.29   1
  -1  -8  -1  77070. 3601.25   1
  -1  -8  -1  78079. 3594.29   1
   1   8   1  67780. 3332.29   1
   1   8   1  76096. 3477.73   1
  -1  -8  -2 125122. 5090.46   1
  -1  -8  -2 134307. 5316.63   1
   1   8   2 130724. 5260.96   1
   1   8   2 125748. 5170.49   1
  -1  -8  -3 -1526.4 1941.54   1
  -1  -8  -3 -451.29 1652.05   1
   1   8   3   24.04 1651.36   1
   1   8   3 -1759.9 2007.30   1
  -1  -8  -4  13305. 1920.32   1
  -1  -8  -4  11002. 1862.91   1
   1   8   4 9759.91 1780.44   1
   1   8   4  11037. 2096.38   1
  -1  -8  -5  84621. 3810.02   1
  -1  -8  -5  81037. 3562.98   1
   1   8   5  83194. 3695.19   1
   1   8   5  86569. 4088.37   1
  -1  -8  -6 3517.74 1810.37   1
  -1  -8  -6 1002.78 1719.55   1
   1   8   6 2882.39 1652.05   1
   1   8   6 2112.73 1774.18   1
  -1  -8  -7  90814. 4060.54   1
  -1  -8  -7  85595. 3910.92   1
   1   8   7  80097. 3531.66   1
   1   8   7  87195. 4112.73   1
  -1  -8  -8   96.49 1923.10   1
  -1  -8  -8 2344.47 2000.00   1
   1   8   8 -1920.0 1678.84   1
   1   8   8  703.55 2225.82   1
  -1  -8  -9  15915. 2075.15   1
  -1  -8  -9  19252. 2461.03   1
   1   8   9  16242. 2489.91   1
   1   8   9  13702. 1912.66   1
  -1  -8 -10 3670.84 2109.60   1
  -1  -8 -10  542.45 2240.43   1
   1   8  10 -405.01 2001.39   1
   1   8  10 -488.52 2257.13   1
  -1  -8 -11 -959.64 2280.44   1
  -1  -8 -11    6.00 1894.57   1
   1   8  11 2419.97 2122.48   1
   1   8  11 2358.04 2383.78   1
  -1  -8 -12 -121.26 2686.84   1
  -1  -8 -12 -1322.9 2358.04   1
   1   8  12  698.68 2205.29   1
   1   8  12 2742.52 2763.39   1
  -1  -8 -13  129.26 2449.20   1
  -1  -8 -13 1835.77 2016.70   1
   1   8  13 2680.93 2349.68   1
   1   8  13 1660.75 2032.70   1
  -1  -8 -14  931.11 2588.03   1
  -1  -8 -14 -4582.5 2834.03   1
   1   8  14 2101.95 2463.46   1
   1   8  14 -1322.5 2916.14   1
  -1  -8 -15 2268.61 1991.30   1
  -1  -8 -15 5093.94 2715.03   1
   1   8  15 4752.95 2622.47   1
   1   8  15 3077.94 2758.52   1
  -1  -8 -16 7226.85 2036.53   1
  -1  -8 -16  12829. 3028.18   1
   1   8  16  14071. 2651.01   1
   1   8  16 8100.20 2386.57   1
  -1  -8 -17 1021.22 2946.76   1
  -1  -8 -17  883.09 2388.65   1
   1   8  17 3011.83 2453.37   1
   1   8  17 -2907.1 2544.53   1
  -1  -8 -18  276.48 2917.88   1
  -1  -8 -18 3601.25 2577.24   1
   1   8  18 -802.02 2496.17   1
   1   8  18 3052.19 3158.66   1
  -1  -8 -19 8924.83 2978.77   1
  -1  -8 -19 4436.32 2826.02   1
   1   8  19 7407.79 2694.50   1
   1   8  19  13834. 3135.70   1
  -1  -8 -20 4871.25 2944.33   1
  -1  -8 -20 2291.23 2876.13   1
   1   8  20 3545.58 2632.57   1
   1   8  20 4505.91 2904.66   1
  -1  -8 -21 3862.21 2991.65   1
  -1  -8 -21 7359.07 3014.96   1
   1   8  21 6200.41 2815.59   1
   1   8  21 2589.07 2758.52   1
  -1  -8 -22 6308.28 2998.26   1
  -1  -8 -22 1234.17 2500.35   1
   1   8  22 7077.24 3028.18   1
   1   8  22 -1658.3 2678.49   1
  -1  -9  24 -307.62 2627.00   1
  -1  -9  24 4519.83 3036.53   1
   1   9 -24 3302.71 2990.95   1
   1   9 -24 -339.53 3102.29   1
  -1  -9  23  27623. 2494.78   1
  -1  -9  23  28859. 3378.56   1
   1   9 -23  26381. 2899.09   1
   1   9 -23  29649. 3559.50   1
  -1  -9  22 8806.53 2891.44   1
  -1  -9  22 6663.18 2104.03   1
   1   9 -22 5650.66 2926.58   1
   1   9 -22 4109.25 1976.69   1
  -1  -9  21 -177.52 2646.83   1
  -1  -9  21 4951.28 2078.29   1
   1   9 -21 -2729.6 2059.50   1
   1   9 -21  915.45 2838.20   1
  -1  -9  20 2392.13 2764.09   1
  -1  -9  20 4812.10 1840.64   1
   1   9 -20 1062.28 2473.55   1
   1   9 -20 4394.57 2864.30   1
  -1  -9  19 1570.98 1934.58   1
  -1  -9  19 3886.57 2412.66   1
   1   9 -19  132.81 2236.60   1
   1   9 -19  651.36 2930.06   1
  -1  -9  18 3445.37 2425.54   1
  -1  -9  18  113.74 2557.76   1
   1   9 -18 5153.09 2455.81   1
   1   9 -18 4502.43 2785.31   1
  -1  -9  17  23570. 2736.95   1
  -1  -9  17  19391. 2779.05   1
   1   9 -17  16736. 2498.26   1
   1   9 -17  25035. 2919.62   1
  -1  -9  16 -192.73 2398.05   1
  -1  -9  16 1128.74 2241.82   1
   1   9 -16 -690.67 1645.44   1
   1   9 -16 1982.25 2555.67   1
  -1  -9  15 2075.15 2196.59   1
  -1  -9  15   38.87 2215.73   1
   1   9 -15  -47.39 2255.74   1
   1   9 -15 3037.58 2376.48   1
  -1  -9  14  18782. 2463.46   1
  -1  -9  14  23163. 2797.49   1
   1   9 -14  24127. 2695.54   1
   1   9 -14  23994. 2517.05   1
  -1  -9  13  21639. 2503.48   1
  -1  -9  13  25626. 2147.88   1
   1   9 -13  25254. 2447.81   1
   1   9 -13  29656. 2943.63   1
  -1  -9  12 4199.72 1996.87   1
  -1  -9  12 2549.75 1953.37   1
   1   9 -12 4307.58 1711.20   1
   1   9 -12 2859.77 2345.16   1
  -1  -9  11  28316. 2318.02   1
  -1  -9  11  26214. 2426.93   1
   1   9 -11  28003. 2296.45   1
   1   9 -11  28598. 2720.60   1
  -1  -9  10  865.00 1831.94   1
  -1  -9  10 1400.83 1640.92   1
   1   9 -10 -794.71 1648.57   1
   1   9 -10  220.39 1986.43   1
  -1  -9   9 5751.56 1873.35   1
  -1  -9   9 7630.47 1733.47   1
   1   9  -9 8114.12 1850.38   1
   1   9  -9 5212.24 2042.45   1
  -1  -9   8  969.73 1523.66   1
  -1  -9   8 2299.93 1900.14   1
   1   9  -8  251.15 1744.61   1
   1   9  -8 -553.24 1967.99   1
  -1  -9   7 6043.84 1737.30   1
  -1  -9   7 6784.96 1834.03   1
   1   9  -7 7894.91 1882.04   1
   1   9  -7  13549. 2227.90   1
  -1  -9   6  951.98 1942.93   1
  -1  -9   6 -141.44 1612.39   1
   1   9  -6 1144.40 1877.17   1
   1   9  -6 -345.16 1740.43   1
  -1  -9   5 -1016.7 1917.19   1
  -1  -9   5 -279.64 1679.89   1
   1   9  -5 -1893.2 1710.16   1
   1   9  -5 -133.33 1806.19   1
  -1  -9   4  13796. 1962.42   1
  -1  -9   4  11980. 1829.85   1
   1   9  -4  12035. 1786.36   1
   1   9  -4  13253. 2015.31   1
  -1  -9   3 1803.41 1659.01   1
  -1  -9   3 -880.65 1761.65   1
   1   9  -3 -1759.9 1610.30   1
   1   9  -3 -443.63 1781.84   1
  -1  -9   2  66075. 3181.28   1
  -1  -9   2  66006. 3176.41   1
   1   9  -2  71642. 3347.25   1
   1   9  -2  72338. 3437.37   1
  -1  -9   1 3764.78 1732.77   1
  -1  -9   1 3810.02 1735.91   1
   1   9  -1  817.67 1641.26   1
   1   9  -1 2295.75 1862.56   1
  -1  -9   0 112039. 4669.45   1
  -1  -9   0 119415. 4895.61   1
   1   9   0 118754. 4784.27   1
   1   9   0 113118. 4697.28   1
  -1  -9  -1  60056. 3073.76   1
  -1  -9  -1  54836. 2956.50   1
   1   9   1  54210. 2780.44   1
   1   9   1  59325. 3248.78   1
  -1  -9  -2  18187. 2094.64   1
  -1  -9  -2  20268. 2034.44   1
   1   9   2  20529. 2207.37   1
   1   9   2  16858. 1898.40   1
  -1  -9  -3 2338.20 1796.45   1
  -1  -9  -3 -223.42 1862.21   1
   1   9   3 -1123.5 1622.48   1
   1   9   3  229.02 2030.62   1
  -1  -9  -4  271.96 2041.06   1
  -1  -9  -4 3482.95 1866.04   1
   1   9   4 -677.45 1659.36   1
   1   9   4 -825.33 2212.94   1
  -1  -9  -5 4196.24 1863.26   1
  -1  -9  -5 6270.00 2038.97   1
   1   9   5 7059.84 1731.73   1
   1   9   5  10251. 2409.53   1
  -1  -9  -6  990.60 1827.42   1
  -1  -9  -6  954.77 1621.78   1
   1   9   6   42.38 1678.15   1
   1   9   6 -1936.3 2173.62   1
  -1  -9  -7 7560.88 2198.33   1
  -1  -9  -7  12537. 1969.03   1
   1   9   7  10731. 2092.55   1
   1   9   7  12331. 2374.04   1
  -1  -9  -8 4523.31 1809.67   1
  -1  -9  -8  364.30 2116.56   1
   1   9   8 3768.26 2069.24   1
   1   9   8 3556.02 2324.98   1
  -1  -9  -9 8573.41 2406.40   1
  -1  -9  -9 6016.00 2118.30   1
   1   9   9 5034.79 1840.29   1
   1   9   9 4822.54 2627.00   1
  -1  -9 -10 5744.60 2346.21   1
  -1  -9 -10 9787.74 2486.78   1
   1   9  10 4523.31 2592.20   1
   1   9  10 5598.46 2129.43   1
  -1  -9 -11  28479. 2737.30   1
  -1  -9 -11  21447. 2302.02   1
   1   9  11  20365. 2352.12   1
   1   9  11  27637. 2722.68   1
  -1  -9 -12 4665.97 2068.54   1
  -1  -9 -12 3775.22 2835.42   1
   1   9  12 4091.85 2162.14   1
   1   9  12 8872.64 2826.02   1
  -1  -9 -13  69798. 3604.73   1
  -1  -9 -13  80202. 3959.63   1
   1   9  13  78775. 3959.63   1
   1   9  13  67328. 3865.69   1
  -1  -9 -14 7066.80 2955.46   1
  -1  -9 -14 8552.53 2772.44   1
   1   9  14 5838.55 2423.80   1
   1   9  14 5285.31 2887.26   1
  -1  -9 -15 -847.60 2741.47   1
  -1  -9 -15 5535.83 2884.48   1
   1   9  15 3086.64 2524.01   1
   1   9  15  736.95 3198.67   1
  -1  -9 -16  443.28 2084.55   1
  -1  -9 -16 2276.62 2741.47   1
   1   9  16 6503.12 2542.80   1
   1   9  16 1698.33 3172.93   1
  -1  -9 -17   -3.60 1984.69   1
  -1  -9 -17 3329.50 2897.70   1
   1   9  17 3903.96 2504.52   1
   1   9  17 -1440.8 2376.82   1
  -1  -9 -18 -206.99 2958.24   1
  -1  -9 -18 1289.49 2061.58   1
   1   9  18  668.06 2400.83   1
   1   9  18 2112.73 2573.41   1
  -1  -9 -19 -1987.5 3034.79   1
  -1  -9 -19 6186.49 2870.56   1
   1   9  19 7661.79 2786.71   1
   1   9  19 1956.16 2571.33   1
  -1  -9 -20 2660.75 3070.28   1
  -1  -9 -20 8448.15 2817.67   1
   1   9  20 3615.17 2984.69   1
   1   9  20 4373.69 2629.43   1
  -1  -9 -21  834.38 2386.91   1
  -1  -9 -21 1572.37 3026.09   1
   1   9  21 5953.37 3070.63   1
   1   9  21 1303.76 2527.49   1
  -1 -10  23 3208.07 2804.45   1
  -1 -10  23 3405.01 2961.38   1
   1  10 -23 4578.98 2795.75   1
   1  10 -23 -1431.8 3072.02   1
  -1 -10  22 7289.48 2973.90   1
  -1 -10  22 3702.15 2985.38   1
   1  10 -22 9105.77 2716.07   1
   1  10 -22 3139.18 3016.70   1
  -1 -10  21 -5810.7 2826.37   1
  -1 -10  21 -523.31 2718.51   1
   1  10 -21 2933.89 2545.93   1
   1  10 -21 2207.37 2937.02   1
  -1 -10  20  16719. 2874.39   1
  -1 -10  20  16138. 2769.31   1
   1  10 -20  16858. 2710.16   1
   1  10 -20  14683. 3008.70   1
  -1 -10  19 2488.52 2649.27   1
  -1 -10  19 3893.52 2489.91   1
   1  10 -19 3858.73 2829.50   1
   1  10 -19 6162.14 2434.24   1
  -1 -10  18 -462.07 2532.70   1
  -1 -10  18 -1247.7 1922.06   1
   1  10 -18 -1369.2 1627.35   1
   1  10 -18 -1024.4 2809.32   1
  -1 -10  17 5584.55 2363.95   1
  -1 -10  17 5219.20 2355.60   1
   1  10 -17 1370.21 2123.87   1
   1  10 -17 2876.82 2822.54   1
  -1 -10  16 5685.45 2592.90   1
  -1 -10  16 2834.37 2120.39   1
   1  10 -16 3261.31 2410.23   1
   1  10 -16  -56.37 2627.35   1
  -1 -10  15 -264.58 2119.34   1
  -1 -10  15  442.24 2467.64   1
   1  10 -15 1111.69 2018.79   1
   1  10 -15 4913.01 2667.71   1
  -1 -10  14 -2331.2 2204.24   1
  -1 -10  14 2029.23 1758.52   1
   1  10 -14 1584.20 2178.15   1
   1  10 -14  221.89 2590.81   1
  -1 -10  13  644.75 2290.19   1
  -1 -10  13 4888.65 2281.14   1
   1  10 -13  -60.72 2144.74   1
   1  10 -13 -269.31 2396.66   1
  -1 -10  12 6447.45 1786.71   1
  -1 -10  12 8897.00 2322.89   1
   1  10 -12 8597.76 2052.89   1
   1  10 -12  11729. 2671.88   1
  -1 -10  11 7961.02 2157.27   1
  -1 -10  11 3538.62 2068.20   1
   1  10 -11 7915.79 2314.19   1
   1  10 -11 8218.50 1877.87   1
  -1 -10  10  88031. 4123.17   1
  -1 -10  10  80410. 3771.74   1
   1  10 -10  78044. 3653.44   1
   1  10 -10  89179. 4262.35   1
  -1 -10   9  15438. 2200.07   1
  -1 -10   9  14457. 1758.18   1
   1  10  -9  14826. 1942.93   1
   1  10  -9  12088. 2297.14   1
  -1 -10   8 1839.25 1416.14   1
  -1 -10   8 -410.58 1927.28   1
   1  10  -8  893.53 1814.89   1
   1  10  -8 -2066.1 2109.95   1
  -1 -10   7 4352.81 1857.69   1
  -1 -10   7 3799.58 1574.11   1
   1  10  -7 6736.25 1753.30   1
   1  10  -7 7884.47 2143.70   1
  -1 -10   6 8552.53 1891.79   1
  -1 -10   6 4613.77 1810.72   1
   1  10  -6 7519.13 1699.37   1
   1  10  -6 4189.28 2047.32   1
  -1 -10   5 4053.58 1796.45   1
  -1 -10   5 5601.94 2036.88   1
   1  10  -5 3164.92 1825.33   1
   1  10  -5 8872.64 1977.38   1
  -1 -10   4  22042. 2160.05   1
  -1 -10   4  20957. 2196.59   1
   1  10  -4  26287. 2170.14   1
   1  10  -4  25734. 2289.14   1
  -1 -10   3 -405.71 1858.04   1
  -1 -10   3  267.50 1720.60   1
   1  10  -3 3583.85 1987.47   1
   1  10  -3  599.86 1700.07   1
  -1 -10   2 -1900.5 1768.27   1
  -1 -10   2 -698.68 1862.21   1
   1  10  -2 -1117.3 1700.07   1
   1  10  -2 2837.16 2011.83   1
  -1 -10   1 -765.48 1897.01   1
  -1 -10   1 1835.42 1828.11   1
   1  10  -1 -809.32 1672.23   1
   1  10  -1 6638.82 2092.20   1
  -1 -10   0 1671.54 1838.90   1
  -1 -10   0  278.32 1817.67   1
   1  10   0 -385.53 1597.42   1
   1  10   0 -776.97 2113.78   1
  -1 -10  -1  14864. 2005.57   1
  -1 -10  -1  12839. 2001.04   1
   1  10   1  11065. 1774.88   1
   1  10   1  10713. 2322.89   1
  -1 -10  -2 4182.32 1890.39   1
  -1 -10  -2 9070.97 1801.32   1
   1  10   2 7167.70 1908.14   1
   1  10   2 7146.83 2247.39   1
  -1 -10  -3  171.68 1788.45   1
  -1 -10  -3 -1506.3 1846.55   1
   1  10   3 -1815.2 1903.27   1
   1  10   3 -520.53 2314.89   1
  -1 -10  -4 5692.41 1684.76   1
  -1 -10  -4 1095.68 2084.55   1
   1  10   4 2400.14 1787.40   1
   1  10   4 3963.11 2023.31   1
  -1 -10  -5 -1391.4 2008.70   1
  -1 -10  -5   71.16 1575.85   1
   1  10   5 4297.14 2098.81   1
   1  10   5 1085.25 1913.71   1
  -1 -10  -6  10383. 2166.66   1
  -1 -10  -6  15285. 1948.50   1
   1  10   6  10522. 2075.50   1
   1  10   6  13643. 2409.53   1
  -1 -10  -7  17996. 2525.05   1
  -1 -10  -7  18017. 2226.86   1
   1  10   7  16190. 2175.02   1
   1  10   7  22477. 2847.60   1
  -1 -10  -8 7630.47 2188.24   1
  -1 -10  -8 5427.97 2434.24   1
   1  10   8 6450.93 2080.72   1
   1  10   8 9512.86 2544.19   1
  -1 -10  -9 4958.24 2437.02   1
  -1 -10  -9 3240.43 2237.65   1
   1  10   9 6419.62 2137.44   1
   1  10   9 5278.35 2434.58   1
  -1 -10 -10 4286.70 2389.00   1
  -1 -10 -10 1593.60 2240.08   1
   1  10  10 -797.84 2137.78   1
   1  10  10 -391.44 2682.67   1
  -1 -10 -11  -56.47 2799.58   1
  -1 -10 -11 4714.68 2478.08   1
   1  10  11 -1667.4 2336.11   1
   1  10  11 -2848.6 2472.86   1
  -1 -10 -12 3152.05 2554.28   1
  -1 -10 -12 -654.49 2620.04   1
   1  10  12 4669.45 2932.15   1
   1  10  12 1583.51 2763.39   1
  -1 -10 -13 8952.67 2726.86   1
  -1 -10 -13 9491.99 2605.77   1
   1  10  13 7901.87 2153.79   1
   1  10  13 9185.79 2423.80   1
  -1 -10 -14 6951.98 2733.47   1
  -1 -10 -14 2443.28 2998.95   1
   1  10  14 -2478.1 2265.13   1
   1  10  14 -3226.5 3131.87   1
  -1 -10 -15 3785.66 2406.75   1
  -1 -10 -15 2829.85 2890.05   1
   1  10  15 3144.74 2234.17   1
   1  10  15 7258.17 3168.06   1
  -1 -10 -16 3169.45 2169.45   1
  -1 -10 -16 7038.96 2862.91   1
   1  10  16 5688.93 2466.94   1
   1  10  16 1790.88 2834.03   1
  -1 -10 -17  196.66 2904.31   1
  -1 -10 -17 1766.87 2156.92   1
   1  10  17 4933.89 2500.69   1
   1  10  17 -2320.1 2436.32   1
  -1 -10 -18 -1064.7 3009.74   1
  -1 -10 -18  424.84 2192.41   1
   1  10  18  139.18 2650.31   1
   1  10  18 -2010.8 2305.84   1
  -1 -10 -19 -3409.9 2698.68   1
  -1 -10 -19 2854.90 2847.60   1
   1  10  19 1310.37 2732.08   1
   1  10  19 3203.20 2893.18   1
  -1 -10 -20 1250.87 2561.93   1
  -1 -10 -20 1463.46 2699.02   1
   1  10  20 -3524.7 2742.86   1
   1  10  20 -2860.5 2913.36   1
  -1 -11  22  -90.33 2691.02   1
  -1 -11  22 1817.33 2152.75   1
   1  11 -22 -1564.0 3212.59   1
   1  11 -22  132.99 2064.02   1
  -1 -11  21 8274.17 2845.51   1
  -1 -11  21 1287.40 1932.15   1
   1  11 -21 4356.29 1909.88   1
   1  11 -21 6057.75 3031.66   1
  -1 -11  20  25129. 3211.55   1
  -1 -11  20  19036. 2265.13   1
   1  11 -20  20884. 2113.08   1
   1  11 -20  22714. 3341.68   1
  -1 -11  19 6861.51 2108.21   1
  -1 -11  19 7000.69 2644.05   1
   1  11 -19 6694.50 2462.77   1
   1  11 -19 7679.19 2838.20   1
  -1 -11  18  25209. 2822.89   1
  -1 -11  18  22262. 2602.99   1
   1  11 -18  26319. 2893.53   1
   1  11 -18  22317. 3333.33   1
  -1 -11  17  17376. 2688.93   1
  -1 -11  17  21270. 2862.56   1
   1  11 -17  13027. 2694.85   1
   1  11 -17  17665. 3065.41   1
  -1 -11  16 3823.94 2703.55   1
  -1 -11  16 2257.13 2399.79   1
   1  11 -16 -947.46 2302.36   1
   1  11 -16 2843.07 2909.18   1
  -1 -11  15  11204. 2382.04   1
  -1 -11  15 8288.09 2629.43   1
   1  11 -15  10856. 1851.08   1
   1  11 -15  11562. 2977.38   1
  -1 -11  14 1433.54 2274.88   1
  -1 -11  14 2021.22 2124.56   1
   1  11 -14 3128.04 3019.83   1
   1  11 -14 1675.71 2387.26   1
  -1 -11  13  19809. 2495.47   1
  -1 -11  13  24370. 2526.79   1
   1  11 -13  19582. 2318.72   1
   1  11 -13  25727. 3044.88   1
  -1 -11  12 1591.51 2203.55   1
  -1 -11  12 2681.28 1541.40   1
   1  11 -12 4432.84 1930.41   1
   1  11 -12 1365.34 2396.31   1
  -1 -11  11  61935. 3456.16   1
  -1 -11  11  63883. 3507.30   1
   1  11 -11  60543. 3403.96   1
   1  11 -11  54941. 3601.25   1
  -1 -11  10 5991.64 2158.31   1
  -1 -11  10 3011.83 1676.41   1
   1  11 -10 6370.91 1845.51   1
   1  11 -10 7098.11 2426.93   1
  -1 -11   9  36604. 2623.87   1
  -1 -11   9  40919. 2804.45   1
   1  11  -9  40223. 2658.31   1
   1  11  -9  39631. 2929.02   1
  -1 -11   8 5017.39 1789.84   1
  -1 -11   8 7292.96 2021.22   1
   1  11  -8 4791.23 1919.62   1
   1  11  -8 3611.69 2142.66   1
  -1 -11   7 5222.68 1619.34   1
  -1 -11   7 3168.40 1990.26   1
   1  11  -7 3851.77 1935.28   1
   1  11  -7 6186.49 2212.94   1
  -1 -11   6  10525. 2049.41   1
  -1 -11   6  10571. 1945.37   1
   1  11  -6 6207.37 2144.40   1
   1  11  -6 7018.09 1779.40   1
  -1 -11   5  29321. 2362.56   1
  -1 -11   5  25111. 2257.83   1
   1  11  -5  35317. 2332.98   1
   1  11  -5  31347. 2418.58   1
  -1 -11   4 2162.14 2011.48   1
  -1 -11   4 9237.99 1705.98   1
   1  11  -4 8079.32 1622.13   1
   1  11  -4 7842.72 1970.77   1
  -1 -11   3  28932. 2284.97   1
  -1 -11   3  30995. 2316.28   1
   1  11  -3  28090. 2136.05   1
   1  11  -3  34381. 2422.75   1
  -1 -11   2 7178.14 1859.78   1
  -1 -11   2  10720. 1856.99   1
   1  11  -2 6106.47 1834.72   1
  -1 -11   1  12592. 1902.92   1
  -1 -11   1  11333. 1866.73   1
   1  11  -1  11802. 1963.46   1
   1  11  -1  12700. 1972.86   1
  -1 -11   0 -656.23 1708.77   1
  -1 -11   0  774.88 1768.96   1
   1  11   0  864.30 1764.44   1
   1  11   0 1340.99 1945.02   1
  -1 -11  -1 -393.88 1710.85   1
  -1 -11  -1 -2763.4 1900.14   1
   1  11   1 -667.71 1945.37   1
   1  11   1  752.96 2045.58   1
  -1 -11  -2 2993.73 1822.55   1
  -1 -11  -2 1725.12 1775.22   1
   1  11   2 2038.97 2164.92   1
   1  11   2 3917.88 1859.08   1
  -1 -11  -3 2521.92 1996.52   1
  -1 -11  -3 1261.31 1741.82   1
   1  11   3 1280.44 2077.59   1
   1  11   3 -1423.1 2205.98   1
  -1 -11  -4  20202. 2385.87   1
  -1 -11  -4  16371. 2088.72   1
   1  11   4  13100. 2095.68   1
   1  11   4  14572. 2526.79   1
  -1 -11  -5 3091.51 1965.55   1
  -1 -11  -5 -911.27 2087.68   1
   1  11   5 4077.94 1949.20   1
   1  11   5 3796.10 2447.81   1
  -1 -11  -6  12032. 2471.81   1
  -1 -11  -6 9749.47 2065.06   1
   1  11   6  12091. 2158.66   1
   1  11   6  12352. 2209.11   1
  -1 -11  -7  299.03 2428.67   1
  -1 -11  -7 -325.96 1949.20   1
   1  11   7 1083.51 2115.52   1
   1  11   7 2203.20 2578.29   1
  -1 -11  -8 1662.84 2278.70   1
  -1 -11  -8 3158.31 2415.10   1
   1  11   8 6527.48 2137.09   1
   1  11   8 2972.51 2630.13   1
  -1 -11  -9 4780.79 2161.79   1
  -1 -11  -9 -2678.5 2297.84   1
   1  11   9 2216.77 2246.00   1
   1  11   9 2232.08 2276.96   1
  -1 -11 -10 -2250.2 2474.25   1
  -1 -11 -10  988.17 2531.31   1
   1  11  10 4206.68 2711.55   1
   1  11  10 1314.54 2221.99   1
  -1 -11 -11  27488. 3105.77   1
  -1 -11 -11  24659. 2317.67   1
   1  11  11  27074. 2573.41   1
   1  11  11  27975. 2838.55   1
  -1 -11 -12 9077.93 2828.81   1
  -1 -11 -12 6332.63 2903.96   1
   1  11  12 3726.51 2271.74   1
   1  11  12 4913.01 2643.35   1
  -1 -11 -13  13114. 3165.27   1
  -1 -11 -13  21534. 2983.99   1
   1  11  13  18069. 2603.69   1
   1  11  13  17422. 3155.18   1
  -1 -11 -14 -1554.3 3004.52   1
  -1 -11 -14 -2394.9 2271.40   1
   1  11  14 -1133.3 2586.29   1
   1  11  14 3037.92 2728.60   1
  -1 -11 -15 4669.45 2987.47   1
  -1 -11 -15 9519.82 2290.53   1
   1  11  15 9808.62 2592.20   1
   1  11  15 2279.40 2299.93   1
  -1 -11 -16 1916.49 3063.67   1
  -1 -11 -16 3200.07 3057.06   1
   1  11  16 -1550.1 3031.31   1
   1  11  16 1893.87 2859.08   1
  -1 -11 -17 4954.76 3177.10   1
  -1 -11 -17  813.15 2970.42   1
   1  11  17 3660.40 2675.36   1
   1  11  17 -6311.8 3325.68   1
  -1 -11 -18 2092.20 3124.56   1
  -1 -11 -18 5765.48 2863.25   1
   1  11  18 1538.62 3427.28   1
   1  11  18 7477.38 2939.11   1
  -1 -12  20 -2835.4 2715.03   1
  -1 -12  20 -183.16 1911.97   1
   1  12 -20 -647.18 1911.27   1
   1  12 -20 5789.83 3517.74   1
  -1 -12  19  23796. 3427.28   1
  -1 -12  19  23570. 2630.13   1
   1  12 -19  25205. 2511.48   1
   1  12 -19  27516. 3437.02   1
  -1 -12  18 2542.45 2352.47   1
  -1 -12  18  684.41 2879.26   1
   1  12 -18 3649.96 2352.12   1
   1  12 -18 2606.47 3005.91   1
  -1 -12  17 1020.88 2451.28   1
  -1 -12  17  254.11 2719.20   1
   1  12 -17 -1671.2 2677.45   1
   1  12 -17  -64.54 2809.32   1
  -1 -12  16  398.40 2512.52   1
  -1 -12  16 1100.56 2642.31   1
   1  12 -16  796.10 2559.15   1
   1  12 -16 -3900.5 3000.00   1
  -1 -12  15 1585.25 2560.89   1
  -1 -12  15 -690.33 2490.60   1
   1  12 -15 3086.29 2188.24   1
   1  12 -15 -3038.3 2736.60   1
  -1 -12  14 6520.52 1885.18   1
  -1 -12  14  13546. 2536.53   1
   1  12 -14 8295.05 2104.38   1
   1  12 -14 4398.05 2868.82   1
  -1 -12  13 -1921.7 2264.79   1
  -1 -12  13 1554.63 2147.88   1
   1  12 -13 5567.15 2788.45   1
   1  12 -13 -2471.1 2056.02   1
  -1 -12  12 3049.41 2295.06   1
  -1 -12  12 1709.81 2147.88   1
   1  12 -12 3990.95 2102.64   1
   1  12 -12 6649.26 2841.33   1
  -1 -12  11 -953.37 2237.99   1
  -1 -12  11 -101.81 1773.14   1
   1  12 -11  917.54 1863.95   1
   1  12 -11 4498.95 2595.33   1
  -1 -12  10  27905. 2461.03   1
  -1 -12  10  26538. 2660.40   1
   1  12 -10  28399. 2509.74   1
   1  12 -10  29805. 2949.89   1
  -1 -12   9 5006.95 2102.99   1
  -1 -12   9 6252.60 1999.30   1
   1  12  -9 2906.05 1854.90   1
   1  12  -9 4965.20 2373.34   1
  -1 -12   8  10546. 2322.89   1
  -1 -12   8 7233.81 1919.27   1
   1  12  -8 6123.86 2048.01   1
   1  12  -8 4913.01 2320.46   1
  -1 -12   7 6826.72 1861.52   1
  -1 -12   7  11357. 2306.89   1
   1  12  -7  10164. 1998.26   1
   1  12  -7 6468.33 2272.44   1
  -1 -12   6  80584. 3792.62   1
  -1 -12   6  75191. 3702.15   1
   1  12  -6  78462. 3688.24   1
   1  12  -6  79541. 4001.39   1
  -1 -12   5 2298.88 2016.35   1
  -1 -12   5 3820.46 1917.88   1
   1  12  -5  370.91 1881.70   1
   1  12  -5 2532.70 1713.64   1
  -1 -12   4  11461. 2044.54   1
  -1 -12   4 9805.14 2020.88   1
   1  12  -4  12797. 1949.20   1
   1  12  -4 9704.24 1994.08   1
  -1 -12   3  12456. 2004.52   1
  -1 -12   3  10779. 1986.78   1
   1  12  -3  12554. 1914.75   1
   1  12  -3  11868. 2027.83   1
  -1 -12   2  692.76 1927.28   1
  -1 -12   2 4846.90 1900.83   1
   1  12  -2 3552.54 1735.56   1
   1  12  -2 1670.84 1911.27   1
  -1 -12   1 9777.30 1986.43   1
  -1 -12   1 7550.45 1838.55   1
   1  12  -1 7118.99 1941.89   1
   1  12  -1  10247. 2136.39   1
  -1 -12   0 3900.48 1876.13   1
  -1 -12   0 -3183.7 1906.05   1
   1  12   0 1974.95 1749.48   1
   1  12   0  784.62 2090.46   1
  -1 -12  -1 4418.92 1940.85   1
  -1 -12  -1 9206.67 1972.86   1
   1  12   1 7647.87 1880.65   1
   1  12   1 9728.59 2313.15   1
  -1 -12  -2  46973. 3014.26   1
  -1 -12  -2  47738. 3046.97   1
   1  12   2  45303. 2812.11   1
   1  12   2  46799. 3270.00   1
  -1 -12  -3 7633.95 2057.76   1
  -1 -12  -3  10992. 2042.45   1
   1  12   3 7755.73 2467.29   1
   1  12   3 5619.34 1996.52   1
  -1 -12  -4  18500. 2318.37   1
  -1 -12  -4  17624. 2340.64   1
   1  12   4  21994. 2399.44   1
   1  12   4  20598. 2830.20   1
  -1 -12  -5 -1631.2 2361.51   1
  -1 -12  -5 5260.96 2022.96   1
   1  12   5 3469.03 2254.35   1
   1  12   5 4697.28 2232.08   1
  -1 -12  -6 3566.45 2010.78   1
  -1 -12  -6 3649.96 2393.87   1
   1  12   6 3681.28 2290.19   1
   1  12   6 6962.42 2536.18   1
  -1 -12  -7 5177.45 2342.03   1
  -1 -12  -7 4053.58 2264.79   1
   1  12   7 5431.45 2186.50   1
   1  12   7 6798.88 2474.60   1
  -1 -12  -8 -373.00 2419.62   1
  -1 -12  -8  331.21 2212.25   1
   1  12   8 2741.47 2095.68   1
   1  12   8 5894.22 2602.99   1
  -1 -12  -9 9154.48 2370.91   1
  -1 -12  -9 5445.37 2512.18   1
   1  12   9 9853.85 2290.19   1
   1  12   9 4095.33 2438.41   1
  -1 -12 -10 -2184.1 2680.58   1
  -1 -12 -10 -1043.1 2453.02   1
   1  12  10  -60.47 2260.26   1
   1  12  10 -4492.0 2750.52   1
  -1 -12 -11 4725.12 2562.98   1
  -1 -12 -11 3764.78 2525.75   1
   1  12  11 4070.98 2763.05   1
   1  12  11  366.04 2381.70   1
  -1 -12 -12 -274.77 2837.16   1
  -1 -12 -12  106.44 2660.75   1
   1  12  12 8155.87 2499.65   1
   1  12  12 5327.07 2508.35   1
  -1 -12 -13 5302.71 2765.48   1
  -1 -12 -13 1144.40 3047.32   1
   1  12  13 -1333.3 2711.55   1
   1  12  13 3454.07 3055.67   1
  -1 -12 -14  10223. 3337.51   1
  -1 -12 -14 9043.14 3112.04   1
   1  12  14 8319.41 2841.33   1
   1  12  14  11524. 3069.93   1
  -1 -12 -15 5337.50 2988.51   1
  -1 -12 -15 -321.36 3064.72   1
   1  12  15 -2466.6 2842.03   1
   1  12  15 4133.61 2987.82   1
  -1 -12 -16 1934.58 3112.73   1
  -1 -12 -16 -2718.2 2147.88   1
   1  12  16 3489.91 2687.89   1
   1  12  16 -226.93 2334.03   1
  -1 -13  19 1656.57 2347.25   1
  -1 -13  19 1255.39 2794.01   1
   1  13 -19  576.55 1881.70   1
   1  13 -19 1387.61 3441.19   1
  -1 -13  18  815.94 2256.78   1
  -1 -13  18 3201.11 2898.40   1
   1  13 -18 4516.35 1854.90   1
   1  13 -18 -1570.6 3315.58   1
  -1 -13  17  13086. 3068.54   1
  -1 -13  17  15557. 2136.74   1
   1  13 -17  14200. 3122.47   1
   1  13 -17  15337. 2393.53   1
  -1 -13  16 -4084.9 2828.46   1
  -1 -13  16 1243.21 1894.57   1
   1  13 -16 3432.50 2435.28   1
   1  13 -16 4749.47 2932.84   1
  -1 -13  15  257.03 2431.10   1
  -1 -13  15 1446.41 2375.43   1
   1  13 -15 2159.36 2621.43   1
   1  13 -15 -913.01 2768.26   1
  -1 -13  14  46520. 3244.60   1
  -1 -13  14  44746. 2981.21   1
   1  13 -14  42623. 3234.86   1
   1  13 -14  41858. 3405.01   1
  -1 -13  13 6868.47 2381.00   1
  -1 -13  13 4634.65 2307.58   1
   1  13 -13 5842.03 2202.50   1
   1  13 -13 6068.19 2766.18   1
  -1 -13  12 1472.51 2342.38   1
  -1 -13  12 -1499.0 1873.35   1
   1  13 -12 1055.32 1998.26   1
   1  13 -12 -7164.2 2687.19   1
  -1 -13  11 -2572.7 1790.53   1
  -1 -13  11  -29.57 2330.90   1
   1  13 -11  614.13 1974.25   1
   1  13 -11 -590.81 2598.47   1
  -1 -13  10 5633.26 2175.36   1
  -1 -13  10 3733.47 2131.52   1
   1  13 -10 3893.52 2058.11   1
   1  13 -10 2271.05 2423.10   1
  -1 -13   9 7233.81 2177.10   1
  -1 -13   9 7658.31 2174.67   1
   1  13  -9 6151.70 2654.49   1
   1  13  -9  11294. 2016.00   1
  -1 -13   8 7028.52 2342.38   1
  -1 -13   8 1673.28 1651.01   1
   1  13  -8 -1701.1 1929.71   1
   1  13  -8  474.60 2502.43   1
  -1 -13   7 1852.12 2147.53   1
  -1 -13   7  146.94 1870.21   1
   1  13  -7 2157.62 2128.04   1
   1  13  -7 3141.61 2282.53   1
  -1 -13   6  21903. 2353.16   1
  -1 -13   6  18504. 2122.82   1
   1  13  -6  24461. 2372.65   1
   1  13  -6  25953. 2555.67   1
  -1 -13   5 7738.34 1869.17   1
  -1 -13   5  13288. 2178.84   1
   1  13  -5 8796.09 1834.38   1
   1  13  -5 6784.96 2167.71   1
  -1 -13   4 8576.89 2244.60   1
  -1 -13   4  11576. 2098.47   1
   1  13  -4  13730. 2080.37   1
   1  13  -4  11722. 2294.01   1
  -1 -13   3 7080.72 2092.20   1
  -1 -13   3  11211. 2108.56   1
   1  13  -3 5824.63 1937.02   1
   1  13  -3 6743.21 2279.05   1
  -1 -13   2 3608.21 2058.45   1
  -1 -13   2 2851.42 1928.32   1
   1  13  -2 3844.81 1915.80   1
   1  13  -2 6339.59 2175.36   1
  -1 -13   1 4384.13 2084.20   1
  -1 -13   1 4993.04 1951.98   1
   1  13  -1 4196.24 2351.77   1
   1  13  -1 1495.82 2005.91   1
  -1 -13   0  15522. 2154.49   1
  -1 -13   0  16037. 2148.92   1
   1  13   0  14137. 2127.00   1
   1  13   0  17401. 2554.28   1
  -1 -13  -1  20992. 2308.63   1
  -1 -13  -1  20852. 2377.52   1
   1  13   1  20035. 2301.67   1
   1  13   1  22811. 2881.35   1
  -1 -13  -2 2648.57 2043.84   1
  -1 -13  -2 1513.57 2080.72   1
   1  13   2 1461.38 1975.64   1
   1  13   2  375.09 2667.36   1
  -1 -13  -3  42658. 2888.31   1
  -1 -13  -3  43215. 2885.87   1
   1  13   3  45337. 2869.17   1
   1  13   3  38726. 3170.14   1
  -1 -13  -4 9137.08 2327.07   1
  -1 -13  -4 5929.01 2163.53   1
   1  13   4 9248.42 2308.97   1
   1  13   4  10191. 2893.53   1
  -1 -13  -5 -1762.0 1901.53   1
  -1 -13  -5 -1159.0 2167.36   1
   1  13   5 -1222.7 2048.36   1
   1  13   5 -3587.3 2380.65   1
  -1 -13  -6  20313. 2566.11   1
  -1 -13  -6  21145. 2585.59   1
   1  13   6  18907. 2390.74   1
   1  13   6  18525. 2902.22   1
  -1 -13  -7  515.31 2384.13   1
  -1 -13  -7  680.93 2065.06   1
   1  13   7 -3329.2 2668.06   1
   1  13   7 1025.40 2400.48   1
  -1 -13  -8 6499.65 2752.96   1
  -1 -13  -8 4140.57 2251.56   1
   1  13   8 4669.45 2319.07   1
   1  13   8 5734.16 2350.03   1
  -1 -13  -9 7404.31 2513.22   1
  -1 -13  -9  12022. 2791.58   1
   1  13   9 9996.51 2462.42   1
   1  13   9  10369. 2921.01   1
  -1 -13 -10 1521.92 2393.18   1
  -1 -13 -10 4686.84 2803.76   1
   1  13  10 4144.05 2381.00   1
   1  13  10 6106.47 2988.86   1
  -1 -13 -11 1893.18 2636.74   1
  -1 -13 -11 -156.54 2009.04   1
   1  13  11 3339.25 2424.49   1
   1  13  11 -1609.6 2566.11   1
  -1 -13 -12 3383.09 2680.58   1
  -1 -13 -12 4391.09 3026.44   1
   1  13  12 1367.08 2681.28   1
   1  13  12  874.04 2460.33   1
  -1 -13 -13 6259.56 3305.84   1
  -1 -13 -13 1322.89 2854.56   1
   1  13  13 -187.68 2766.52   1
   1  13  13 2866.39 3055.67   1
  -1 -13 -14 2995.82 3123.17   1
  -1 -13 -14 3342.72 2888.65   1
   1  13  14 4505.91 2963.11   1
   1  13  14 5441.89 3209.11   1
  -1 -14  17 5848.99 2713.64   1
   1  14 -17 5309.67 3030.96   1
  -1 -14  16  47321. 3387.61   1
  -1 -14  16  47877. 3247.39   1
   1  14 -16  37543. 3709.11   1
   1  14 -16  46729. 3309.32   1
  -1 -14  15  18017. 2756.78   1
  -1 -14  15  16510. 2892.13   1
   1  14 -15  18775. 2646.14   1
   1  14 -15  19141. 3182.67   1
  -1 -14  14 1308.98 2853.51   1
  -1 -14  14 1977.38 2507.65   1
   1  14 -14 1727.90 2666.32   1
   1  14 -14 1822.20 2046.97   1
  -1 -14  13  602.64 2647.53   1
  -1 -14  13  129.33 2222.68   1
   1  14 -13 -1195.9 1998.61   1
   1  14 -13 -6203.9 2791.23   1
  -1 -14  12  798.89 2206.68   1
  -1 -14  12   87.89 2001.74   1
   1  14 -12 2864.99 2146.14   1
   1  14 -12 3803.06 2517.05   1
  -1 -14  11 -2817.3 2359.08   1
  -1 -14  11 1894.22 1868.47   1
   1  14 -11 1471.81 2140.22   1
   1  14 -11 6325.67 2614.47   1
  -1 -14  10 1072.72 2155.18   1
  -1 -14  10 3129.43 2098.12   1
   1  14 -10 4683.36 2437.37   1
   1  14 -10 1013.92 2219.90   1
  -1 -14   9 -3629.1 2170.84   1
  -1 -14   9 1073.42 1985.38   1
   1  14  -9 -792.97 2207.03   1
   1  14  -9 1081.07 2545.93   1
  -1 -14   8 -4363.3 1985.73   1
  -1 -14   8 4220.59 2013.57   1
   1  14  -8 -3044.2 2232.43   1
   1  14  -8 -888.66 2166.66   1
  -1 -14   7 -2298.9 2057.41   1
  -1 -14   7 2944.67 1859.08   1
   1  14  -7 2437.37 2080.37   1
   1  14  -7 3816.98 2306.54   1
  -1 -14   6  27648. 2536.18   1
  -1 -14   6  24788. 1911.97   1
   1  14  -6  27049. 2621.08   1
   1  14  -6  27523. 2744.60   1
  -1 -14   5  688.24 2041.06   1
  -1 -14   5 -1347.6 1954.07   1
   1  14  -5 -1054.3 1906.05   1
   1  14  -5 2027.49 2255.74   1
  -1 -14   4 1134.31 2147.88   1
  -1 -14   4  216.94 2048.71   1
   1  14  -4  850.73 1943.98   1
   1  14  -4 1598.82 2291.93   1
  -1 -14   3 6238.69 2278.36   1
  -1 -14   3 2032.01 2075.15   1
   1  14  -3 1090.81 1971.12   1
   1  14  -3 3093.25 2314.54   1
  -1 -14   2  36500. 2709.81   1
  -1 -14   2  36534. 2754.35   1
   1  14  -2  40745. 2771.05   1
   1  14  -2  40953. 3252.95   1
  -1 -14   1 3455.46 2033.75   1
  -1 -14   1   50.31 2091.86   1
   1  14  -1 4011.83 2014.61   1
   1  14  -1  10024. 2675.71   1
  -1 -14   0  28643. 2693.11   1
  -1 -14   0  25936. 2192.76   1
   1  14   0  21040. 2866.04   1
   1  14   0  20056. 2401.88   1
  -1 -14  -1  -69.52 2075.15   1
  -1 -14  -1 -2376.1 2041.75   1
   1  14   1 -2024.4 2102.64   1
   1  14   1  847.60 2708.42   1
  -1 -14  -2  15661. 2302.36   1
  -1 -14  -2 9324.97 2202.16   1
   1  14   2  14749. 2339.94   1
   1  14   2  13097. 2812.80   1
  -1 -14  -3 3681.28 2130.83   1
  -1 -14  -3 2010.44 2215.73   1
   1  14   3 5727.20 2346.55   1
   1  14   3 -1632.6 2740.08   1
  -1 -14  -4  29071. 2741.47   1
  -1 -14  -4  30066. 2430.06   1
   1  14   4  24579. 2670.84   1
   1  14   4  27603. 3028.18   1
  -1 -14  -5 -222.30 2380.65   1
  -1 -14  -5 -2568.5 1906.05   1
   1  14   5 -3077.6 2255.74   1
   1  14   5 3121.08 1871.61   1
  -1 -14  -6  307.65 2307.93   1
  -1 -14  -6 1141.61 2353.51   1
   1  14   6 -1812.5 2204.94   1
   1  14   6 2949.20 2767.92   1
  -1 -14  -7 -5052.2 2326.37   1
  -1 -14  -7 2170.49 2519.48   1
   1  14   7 1712.94 2267.57   1
   1  14   7 2523.66 2874.04   1
  -1 -14  -8 1499.65 2601.25   1
  -1 -14  -8 2934.93 2126.65   1
   1  14   8 -2194.5 2683.02   1
   1  14   8 3426.93 2462.07   1
  -1 -14  -9 6374.38 2609.95   1
  -1 -14  -9 4363.25 2329.85   1
   1  14   9 3405.01 2595.68   1
   1  14   9  11169. 2607.17   1
  -1 -14 -10  10713. 2827.76   1
  -1 -14 -10 7341.68 2870.91   1
   1  14  10  10682. 2870.56   1
   1  14  10  13365. 2864.30   1
  -1 -14 -11 9558.10 3230.34   1
  -1 -14 -11  12742. 3170.84   1
   1  14  11  11987. 2966.25   1
   1  14  11  10456. 3129.43   1
  -1 -14 -12 1041.75 2614.82   1
  -1 -14 -12   -3.96 3135.35   1
   1  14  12 6510.08 2644.74   1
   1  14  12 1145.79 2955.81   1
  -1 -15  14 -3990.9 2506.26   1
  -1 -15  14 -186.99 2528.18   1
   1  15 -14 5340.98 2330.55   1
   1  15 -14 4387.61 2842.73   1
  -1 -15  13 4478.07 2275.22   1
  -1 -15  13 5285.31 2570.28   1
   1  15 -13 5803.75 2125.61   1
   1  15 -13 5720.24 2495.82   1
  -1 -15  12  18535. 2441.19   1
  -1 -15  12  17784. 2810.37   1
   1  15 -12  18337. 2291.58   1
   1  15 -12  22582. 2775.92   1
  -1 -15  11  13326. 3046.27   1
  -1 -15  11  20073. 2415.79   1
   1  15 -11  21367. 3016.00   1
   1  15 -11  18786. 2247.39   1
  -1 -15  10 1512.52 2470.42   1
  -1 -15  10 -2678.8 1899.44   1
   1  15 -10  440.85 1929.71   1
   1  15 -10 -515.66 2361.17   1
  -1 -15   9  19979. 2389.35   1
  -1 -15   9  25598. 2318.37   1
   1  15  -9  27582. 2456.50   1
   1  15  -9  24207. 2998.26   1
  -1 -15   8  24756. 1992.69   1
  -1 -15   8  23358. 2520.18   1
   1  15  -8  22773. 2366.73   1
   1  15  -8  22624. 2701.11   1
  -1 -15   7 -416.49 2155.18   1
  -1 -15   7 3029.22 1838.20   1
   1  15  -7 1029.23 2048.36   1
   1  15  -7  789.84 2233.47   1
  -1 -15   6 -2765.1 1963.46   1
  -1 -15   6 2830.90 1821.85   1
   1  15  -6 1371.95 2175.36   1
   1  15  -6 2315.24 2358.73   1
  -1 -15   5  25926. 2335.07   1
  -1 -15   5  26148. 2401.18   1
   1  15  -5  27126. 2498.26   1
   1  15  -5  26834. 2711.90   1
  -1 -15   4 3360.82 1987.12   1
  -1 -15   4 -2560.9 1962.42   1
   1  15  -4 -639.87 1950.94   1
   1  15  -4 1266.18 2303.76   1
  -1 -15   3  170.18 1949.89   1
  -1 -15   3 1054.97 1992.00   1
   1  15  -3 -640.22 2408.84   1
   1  15  -3 -1635.3 1933.19   1
  -1 -15   2 3813.50 2438.06   1
  -1 -15   2  763.74 1975.99   1
   1  15  -2 2671.88 1783.58   1
   1  15  -2 2719.90 2395.61   1
  -1 -15   1 -3622.1 2077.59   1
  -1 -15   1 -1041.8 1919.97   1
   1  15  -1 3792.62 2109.60   1
   1  15  -1  503.13 2427.28   1
  -1 -15   0 6033.40 2165.62   1
  -1 -15   0 2749.48 2165.62   1
   1  15   0 2531.31 2052.19   1
   1  15   0 4046.62 2594.99   1
  -1 -15  -1 8458.59 2439.80   1
  -1 -15  -1 5626.30 2114.12   1
   1  15   1 8973.55 2316.28   1
   1  15   1  10424. 2687.54   1
  -1 -15  -2 -3047.7 2155.18   1
  -1 -15  -2 -2051.5 2014.26   1
   1  15   2 1321.85 2167.01   1
   1  15   2 3290.18 2558.45   1
  -1 -15  -3 4405.01 1839.94   1
   1  15   3 3604.73 2184.41   1
   1  15   3 -3806.5 2337.51   1
  -1 -15  -4  849.34 1978.08   1
  -1 -15  -4 3221.29 2323.24   1
   1  15   4  168.75 2371.95   1
   1  15   4 4888.65 1900.83   1
  -1 -15  -5 1413.71 2407.79   1
  -1 -15  -5 2113.78 2239.04   1
   1  15   5 -376.83 2504.17   1
   1  15   5 4213.64 2633.96   1
  -1 -15  -6 -4735.6 2665.62   1
  -1 -15  -6 -1192.1 2399.79   1
   1  15   6 -1239.4 2372.30   1
   1  15   6 1729.30 2791.92   1
  -1 -15  -7 7077.24 2675.36   1
  -1 -15  -7 1002.09 2390.39   1
   1  15   7 3917.88 2567.50   1
   1  15   7 3008.70 2851.42   1
  -1 -15  -8 -6433.5 2402.92   1
  -1 -15  -8 1036.88 2597.07   1
   1  15   8 -1797.1 2839.59   1
   1  15   8 3583.85 2923.10   1
  -1 -15  -9 -2053.9 2573.76   1
  -1 -15  -9 2255.74 2433.89   1
   1  15   9 -1479.1 2837.51   1
   1  15   9 -127.77 2862.91   1
  -1 -16  10 3397.70 2286.01   1
  -1 -16  10 -1031.7 2398.05   1
   1  16 -10 -1007.0 2503.82   1
   1  16 -10 3674.32 2295.75   1
  -1 -16   9 1654.49 2217.81   1
  -1 -16   9 3806.54 2127.35   1
   1  16  -9 1343.77 2377.87   1
   1  16  -9 -907.79 2258.52   1
  -1 -16   8 6593.59 2056.71   1
  -1 -16   8 -1624.6 2252.96   1
   1  16  -8 1655.53 2474.60   1
   1  16  -8  987.82 2140.92   1
  -1 -16   7 2106.47 2216.07   1
  -1 -16   7 -331.59 1768.96   1
   1  16  -7 3027.48 2242.52   1
   1  16  -7 -399.79 2262.00   1
  -1 -16   6 5076.54 2381.70   1
  -1 -16   6 1045.58 1796.10   1
   1  16  -6 2554.63 2130.13   1
   1  16  -6 5257.48 2275.57   1
  -1 -16   5 2767.57 2350.03   1
  -1 -16   5 -1638.8 1794.01   1
   1  16  -5 1602.99 2360.82   1
   1  16  -5 -169.66 2481.90   1
  -1 -16   4  33187. 2791.92   1
  -1 -16   4  37022. 2954.07   1
   1  16  -4  32905. 2545.93   1
   1  16  -4  32516. 2953.72   1
  -1 -16   3  11044. 2536.53   1
  -1 -16   3 4227.55 2119.34   1
   1  16  -3  10285. 2225.82   1
   1  16  -3 9384.12 2491.65   1
  -1 -16   2 8587.33 2480.86   1
  -1 -16   2 4853.86 2184.06   1
   1  16  -2 8350.72 2212.25   1
   1  16  -2 7205.98 2486.08   1
  -1 -16   1 1035.49 2341.68   1
  -1 -16   1 1971.47 2104.73   1
   1  16  -1 -783.92 2118.65   1
   1  16  -1 -1691.7 2660.75   1
  -1 -16   0  16253. 2415.45   1
  -1 -16   0  21134. 2391.44   1
   1  16   0  22394. 2494.43   1
   1  16   0  23333. 2972.16   1
  -1 -16  -1 1461.72 2162.49   1
  -1 -16  -1 1463.46 2168.40   1
   1  16   1 -639.18 2634.30   1
   1  16   1 -731.73 2192.76   1
  -1 -16  -2  18834. 2380.65   1
  -1 -16  -2  19833. 2401.88   1
   1  16   2  14582. 2996.52   1
   1  16   2  14826. 2479.47   1
  -1 -16  -3 -3394.9 2112.04   1
  -1 -16  -3  354.56 2272.79   1
   1  16   3  -63.22 2454.76   1
   1  16   3 -1537.6 2718.16   1
  -1 -16  -4  158.28 2313.85   1
  -1 -16  -4 5532.35 2197.98   1
   1  16   4 -309.01 2438.76   1
   1  16   4 -2858.4 2616.21   1
  -1 -16  -5 4297.14 2336.81   1
  -2  17   2 7289.48 2656.23   1
  -2  17   2 4432.84 2398.05   1
   2 -17  -2 2513.57 2250.52   1
   2 -17  -2 4022.26 2270.35   1
  -2  17   1  11350. 2368.47   1
  -2  17   1 9384.12 2584.20   1
   2 -17  -1 3956.15 2188.59   1
   2 -17  -1 8162.83 2145.79   1
  -2  17   0 2375.78 2190.32   1
  -2  17   0 2986.77 2348.29   1
   2 -17   0 4582.46 2336.81   1
   2 -17   0 1123.17 2084.55   1
  -2  17  -1 5219.20 2196.24   1
  -2  17  -1 8611.68 2776.96   1
   2 -17   1 7954.06 2533.75   1
   2 -17   1 4739.04 2155.18   1
  -2  17  -2 -381.35 2696.94   1
  -2  17  -2 -1672.6 2225.47   1
   2 -17   2 3827.41 2662.49   1
   2 -17   2 -822.89 2461.72   1
  -2  17  -3 6565.76 2600.55   1
  -2  17  -3 4251.91 2035.49   1
   2 -17   3 9832.98 2299.58   1
   2 -17   3 9725.11 2556.02   1
  -2  17  -4 -2689.6 1838.55   1
  -2  17  -4 -146.14 2565.76   1
   2 -17   4 4986.08 2110.30   1
   2 -17   4 1308.28 1975.29   1
  -2  17  -5 2495.13 2433.89   1
  -2  17  -5 5260.96 2091.16   1
   2 -17   5 1720.25 2287.75   1
   2 -17   5 4596.38 2472.16   1
  -2  17  -6 1213.64 2397.35   1
  -2  17  -6 3218.86 2321.15   1
   2 -17   6 -1853.9 2054.97   1
   2 -17   6 5511.48 2553.23   1
  -2  17  -7 2433.54 2340.64   1
  -2  17  -7 -794.71 2242.86   1
   2 -17   7 4144.05 2166.32   1
   2 -17   7 2102.99 2421.71   1
  -2  17  -8 5977.73 2417.19   1
  -2  17  -8 4906.05 2506.26   1
   2 -17   8 9098.81 2433.54   1
   2 -17   8  10783. 2610.64   1
  -2  16   8 -3199.7 2749.48   1
   2 -16  -8 5090.46 2846.55   1
  -2  16   7 7237.29 2519.83   1
  -2  16   7 7400.83 2965.20   1
   2 -16  -7 4926.93 2660.05   1
   2 -16  -7 4425.88 2672.23   1
  -2  16   6 -1647.9 2938.76   1
  -2  16   6 7362.55 2376.48   1
   2 -16  -6 -1122.8 2777.31   1
   2 -16  -6 7578.28 2657.97   1
  -2  16   5 3237.30 2920.32   1
  -2  16   5 1125.96 2345.86   1
   2 -16  -5 1232.43 2300.28   1
   2 -16  -5 2956.85 2412.32   1
  -2  16   4 8333.33 2838.55   1
  -2  16   4 1449.89 2334.37   1
   2 -16  -4 6078.63 2155.53   1
   2 -16  -4 3736.95 2406.75   1
  -2  16   3 5643.70 2218.51   1
  -2  16   3 2949.20 2765.13   1
   2 -16  -3 2009.74 2112.04   1
   2 -16  -3  567.50 2288.10   1
  -2  16   2  32641. 3248.43   1
  -2  16   2  40779. 2932.15   1
   2 -16  -2  36360. 2764.09   1
   2 -16  -2  35873. 3006.96   1
  -2  16   1 1961.38 2654.49   1
  -2  16   1 4123.17 2178.49   1
   2 -16  -1  746.35 2181.97   1
   2 -16  -1 7209.46 2389.70   1
  -2  16   0 -177.49 1874.04   1
  -2  16   0 3241.12 2644.05   1
   2 -16   0 1326.72 2200.42   1
   2 -16   0 -3949.2 2105.43   1
  -2  16  -1  10745. 2095.68   1
  -2  16  -1 7675.71 2667.71   1
   2 -16   1  15390. 2367.43   1
   2 -16   1  11674. 2211.90   1
  -2  16  -2 4102.29 2441.89   1
  -2  16  -2  710.16 1986.43   1
   2 -16   2 4867.78 2294.36   1
   2 -16   2  685.46 2097.08   1
  -2  16  -3 -1630.8 2425.89   1
  -2  16  -3 1527.14 2028.88   1
   2 -16   3 3363.25 2100.21   1
   2 -16   3 4721.64 2340.29   1
  -2  16  -4 6544.88 2488.86   1
  -2  16  -4 7727.90 2114.82   1
   2 -16   4 5588.03 2184.41   1
   2 -16   4  13013. 2480.16   1
  -2  16  -5  17495. 2272.09   1
  -2  16  -5  16110. 2587.33   1
   2 -16   5  15536. 2273.14   1
   2 -16   5  17791. 2607.17   1
  -2  16  -6 1477.03 2319.07   1
  -2  16  -6 1681.28 2092.90   1
   2 -16   6 -381.00 1878.22   1
   2 -16   6 2204.24 2095.34   1
  -2  16  -7  -88.00 2403.96   1
  -2  16  -7 1114.13 2195.20   1
   2 -16   7 6266.52 2121.43   1
   2 -16   7  738.69 2154.83   1
  -2  16  -8 4029.22 2193.11   1
  -2  16  -8 2188.24 2453.72   1
   2 -16   8 6082.11 2094.64   1
   2 -16   8 3893.52 2095.34   1
  -2  16  -9 4064.02 2281.49   1
  -2  16  -9  -999.7 2526.44   1
   2 -16   9 2186.85 2205.63   1
   2 -16   9 1688.24 2231.03   1
  -2  16 -10 2945.02 2688.93   1
  -2  16 -10 3382.74 2134.31   1
   2 -16  10 1259.57 2232.43   1
   2 -16  10 1610.30 2055.32   1
  -2  16 -11  19328. 2663.18   1
  -2  16 -11  27258. 2424.84   1
   2 -16  11  23455. 2247.39   1
   2 -16  11  19795. 2729.29   1
  -2  16 -12 9231.03 2490.95   1
  -2  16 -12 6976.33 2103.34   1
   2 -16  12 9599.85 2026.09   1
   2 -16  12 7832.28 2629.43   1
  -2  16 -13  349.34 2077.59   1
  -2  16 -13 -3266.2 2535.84   1
   2 -16  13 1821.50 1829.50   1
   2 -16  13 -414.06 2953.72   1
  -2  15  11 7035.48 2621.78   1
  -2  15  11 5887.26 2691.72   1
   2 -15 -11 4349.33 2212.59   1
   2 -15 -11 3224.42 2890.74   1
  -2  15  10 2667.36 2184.76   1
  -2  15  10 3576.89 2603.69   1
   2 -15 -10 -915.10 2150.31   1
   2 -15 -10 -4377.2 2908.83   1
  -2  15   9 2552.54 2578.63   1
  -2  15   9 4672.93 2694.85   1
   2 -15  -9 6148.22 2020.18   1
   2 -15  -9 -1506.3 2645.44   1
  -2  15   8 2431.45 2477.73   1
  -2  15   8 -800.63 2630.13   1
   2 -15  -8 -3736.9 2093.25   1
   2 -15  -8   50.66 2507.65   1
  -2  15   7 2748.43 2871.60   1
  -2  15   7 3253.30 2371.95   1
   2 -15  -7  726.86 2420.67   1
   2 -15  -7 -2319.8 2321.85   1
  -2  15   6 4137.09 2934.58   1
  -2  15   6 5591.50 2249.48   1
   2 -15  -6 -524.70 2359.43   1
   2 -15  -6 -367.08 2440.50   1
  -2  15   5 -4401.5 2594.99   1
  -2  15   5 3277.31 2107.51   1
   2 -15  -5 3035.84 2154.83   1
   2 -15  -5 2683.02 2576.89   1
  -2  15   4  12237. 2438.06   1
  -2  15   4 8531.66 2592.55   1
   2 -15  -4 6610.99 2130.83   1
   2 -15  -4 7846.20 2477.03   1
  -2  15   3  33685. 3189.98   1
  -2  15   3  36708. 2948.50   1
   2 -15  -3  34739. 2517.74   1
   2 -15  -3  36569. 2934.58   1
  -2  15   2 1240.43 2297.14   1
  -2  15   2 -3803.1 2196.24   1
   2 -15  -2 3347.94 2050.80   1
   2 -15  -2 3597.77 2174.32   1
  -2  15   1 -3650.0 2193.46   1
  -2  15   1 -3542.1 2602.29   1
   2 -15  -1 -1698.7 2119.69   1
   2 -15  -1 -1341.7 2226.51   1
  -2  15   0 4342.38 2221.64   1
  -2  15   0  220.74 2462.77   1
   2 -15   0 1762.35 2109.25   1
   2 -15   0 2226.16 2248.78   1
  -2  15  -1 -1933.2 2382.39   1
  -2  15  -1  100.59 2004.87   1
   2 -15   1  755.74 2183.37   1
   2 -15   1 1092.90 2030.62   1
  -2  15  -2 6757.13 2487.82   1
  -2  15  -2 6454.41 2087.68   1
   2 -15   2 5271.39 2174.67   1
   2 -15   2 6043.84 2223.38   1
  -2  15  -3 2114.12 2320.11   1
  -2  15  -3 3924.84 2065.76   1
   2 -15   3 4839.94 2221.99   1
   2 -15   3 4349.33 2229.99   1
  -2  15  -4 1202.85 2021.22   1
  -2  15  -4 1785.31 2222.68   1
   2 -15   4 1266.18 2104.73   1
   2 -15   4  750.52 2405.36   1
  -2  15  -5 -1193.5 2144.40   1
  -2  15  -5 2115.52 1972.51   1
   2 -15   5    9.33 2090.81   1
   2 -15   5 2274.88 2358.38   1
  -2  15  -6  12168. 2378.22   1
  -2  15  -6  17864. 2192.06   1
   2 -15   6 9547.66 2058.45   1
   2 -15   6  13914. 2523.66   1
  -2  15  -7  20498. 2366.04   1
  -2  15  -7  21277. 2718.16   1
   2 -15   7  16938. 2204.94   1
   2 -15   7  24391. 2313.15   1
  -2  15  -8 4133.61 2247.74   1
  -2  15  -8 8590.81 2350.73   1
   2 -15   8 6551.84 1615.52   1
   2 -15   8  11082. 2255.39   1
  -2  15  -9 -716.07 2275.57   1
  -2  15  -9 4234.51 2029.92   1
   2 -15   9 4060.54 2073.07   1
   2 -15   9 4826.02 2108.21   1
  -2  15 -10 4662.49 2768.61   1
  -2  15 -10 7557.40 2216.77   1
   2 -15  10 7112.03 2444.33   1
   2 -15  10 7585.24 2179.54   1
  -2  15 -11 1294.71 2482.25   1
  -2  15 -11  842.38 2173.97   1
   2 -15  11 2469.73 2408.84   1
   2 -15  11 -857.69 2183.37   1
  -2  15 -12 -315.59 2390.74   1
  -2  15 -12 3973.55 2592.90   1
   2 -15  12 1808.98 2196.59   1
   2 -15  12  222.13 2284.97   1
  -2  15 -13 5139.17 2921.71   1
  -2  15 -13 8851.77 2199.37   1
   2 -15  13 1073.76 1919.62   1
   2 -15  13 6423.10 2815.24   1
  -2  15 -14 2352.47 3028.53   1
  -2  15 -14 4091.85 1987.82   1
   2 -15  14 1903.62 1728.95   1
   2 -15  14 4763.39 2423.10   1
  -2  15 -15  15884. 1970.07   1
  -2  15 -15  17526. 3107.51   1
   2 -15  15  17780. 2493.73   1
   2 -15  15  19134. 2972.86   1
  -2  15 -16 4366.73 2196.94   1
  -2  15 -16 5445.37 2841.33   1
   2 -15  16 1567.50 2669.80   1
   2 -15  16 2217.46 2808.63   1
  -2  14  13  302.02 2250.52   1
  -2  14  13 5706.33 2750.17   1
   2 -14 -13 4874.73 3236.25   1
   2 -14 -13 5786.35 2456.16   1
  -2  14  12  553.58 2844.46   1
  -2  14  12 2023.31 2703.89   1
   2 -14 -12 -796.10 2842.03   1
   2 -14 -12 4077.94 2784.27   1
  -2  14  11 4091.85 2908.14   1
  -2  14  11 5640.22 2684.41   1
   2 -14 -11 3876.13 2704.24   1
   2 -14 -11 3834.37 2719.20   1
  -2  14  10 -350.38 2315.93   1
  -2  14  10 -2723.7 3026.09   1
   2 -14 -10 2633.61 2717.46   1
   2 -14 -10 -1159.4 2687.54   1
  -2  14   9 1329.50 2966.25   1
  -2  14   9 2599.51 2272.44   1
   2 -14  -9 2839.59 2644.05   1
   2 -14  -9 3917.88 2655.53   1
  -2  14   8 2077.94 2389.70   1
  -2  14   8 1303.41 2466.25   1
   2 -14  -8 5584.55 2233.47   1
   2 -14  -8 4457.20 2556.71   1
  -2  14   7  867.78 2335.42   1
  -2  14   7 -1226.2 2197.63   1
   2 -14  -7 1140.22 1662.14   1
   2 -14  -7 -3556.0 2515.31   1
  -2  14   6 2229.64 2389.35   1
  -2  14   6   54.35 2473.21   1
   2 -14  -6  677.80 2317.67   1
   2 -14  -6  882.05 2705.63   1
  -2  14   5 2178.84 2506.96   1
  -2  14   5 7780.09 2520.53   1
   2 -14  -5 1363.95 2414.05   1
   2 -14  -5 4551.14 2240.43   1
  -2  14   4 4843.42 2271.05   1
  -2  14   4 5560.19 2353.51   1
   2 -14  -4 1077.94 2020.53   1
   2 -14  -4 1839.94 2321.15   1
  -2  14   3  746.69 2535.14   1
  -2  14   3  647.88 1990.60   1
   2 -14  -3 1202.16 2138.48   1
   2 -14  -3 -156.16 2326.02   1
  -2  14   2  14899. 2266.87   1
  -2  14   2 4349.33 2662.14   1
   2 -14  -2  12244. 2384.83   1
   2 -14  -2  10285. 2273.83   1
  -2  14   1 6812.80 2572.02   1
  -2  14   1 5361.86 2086.29   1
   2 -14  -1  10522. 2380.30   1
   2 -14  -1 4530.27 2083.16   1
  -2  14   0  12825. 2413.71   1
  -2  14   0 8284.61 2110.99   1
   2 -14   0 8368.12 2196.24   1
   2 -14   0 5274.87 2090.81   1
  -2  14  -1  414.40 2055.67   1
  -2  14  -1 8048.01 2384.13   1
   2 -14   1 7091.16 2111.34   1
   2 -14   1 7473.90 2062.63   1
  -2  14  -2 1561.93 1853.86   1
  -2  14  -2  916.49 2273.83   1
   2 -14   2 1425.54 2225.12   1
   2 -14   2 1629.43 2061.58   1
  -2  14  -3 4151.01 2153.44   1
  -2  14  -3 7011.13 1993.73   1
   2 -14   3 5807.23 2157.27   1
   2 -14   3 3220.25 2196.24   1
  -2  14  -4 -834.03 2084.20   1
  -2  14  -4 1403.62 1971.47   1
   2 -14   4  459.99 2147.53   1
   2 -14   4  164.58 2257.83   1
  -2  14  -5 5167.01 2233.82   1
  -2  14  -5 4986.08 1946.07   1
   2 -14   5 4234.51 2352.82   1
   2 -14   5 5560.19 2225.82   1
  -2  14  -6 9032.70 1956.16   1
  -2  14  -6 7755.73 2197.28   1
   2 -14   6  10765. 2312.45   1
   2 -14   6  10153. 2202.85   1
  -2  14  -7 3282.53 2179.89   1
  -2  14  -7 2027.49 2017.74   1
   2 -14   7 1983.64 1757.83   1
   2 -14   7 -1872.3 2086.29   1
  -2  14  -8 -615.52 2172.23   1
  -2  14  -8 -4109.3 2143.00   1
   2 -14   8 1796.10 2016.70   1
   2 -14   8 3643.00 2197.63   1
  -2  14  -9  28963. 2590.81   1
  -2  14  -9  28646. 2863.25   1
   2 -14   9  24447. 2282.88   1
   2 -14   9  24495. 2434.93   1
  -2  14 -10 4603.34 1935.98   1
  -2  14 -10 4144.05 2356.64   1
   2 -14  10 5229.64 1934.24   1
   2 -14  10 7348.64 2254.70   1
  -2  14 -11 2363.25 2360.82   1
  -2  14 -11  364.30 2082.46   1
   2 -14  11 5539.31 2231.73   1
   2 -14  11 6416.14 2378.56   1
  -2  14 -12  194.57 2543.49   1
  -2  14 -12 1194.15 2339.94   1
   2 -14  12 3966.59 2322.20   1
   2 -14  12 -1154.8 2488.52   1
  -2  14 -13  11371. 2725.81   1
  -2  14 -13  16966. 2261.65   1
   2 -14  13 9011.82 2044.19   1
   2 -14  13  14756. 2409.18   1
  -2  14 -14  28873. 2476.69   1
  -2  14 -14  36987. 3307.23   1
   2 -14  14  36500. 2877.52   1
   2 -14  14  36674. 2909.18   1
  -2  14 -15  15818. 3167.36   1
  -2  14 -15  24255. 2755.04   1
   2 -14  15  25800. 2965.20   1
   2 -14  15  24064. 2798.88   1
  -2  14 -16  347.91 3089.07   1
  -2  14 -16 3076.20 2497.21   1
   2 -14  16 -2279.4 2688.58   1
   2 -14  16 -700.07 2680.58   1
  -2  14 -17  28090. 2798.88   1
  -2  14 -17  28100. 3594.29   1
   2 -14  17  27467. 2687.89   1
   2 -14  17  29969. 3166.66   1
  -2  14 -18 2440.15 2278.70   1
  -2  14 -18 -1748.4 3215.72   1
   2 -14  18 -1635.0 2402.22   1
   2 -14  18 -750.52 2900.14   1
  -2  13  16 2016.35 3390.39   1
   2 -13 -16 5762.00 3092.20   1
   2 -13 -16 1513.22 3077.24   1
  -2  13  15 -1954.8 3130.48   1
  -2  13  15 -3674.3 2826.72   1
   2 -13 -15 -2319.8 3059.15   1
   2 -13 -15 1078.29 2469.73   1
  -2  13  14 -3216.1 2422.06   1
  -2  13  14 -1118.6 2259.91   1
   2 -13 -14  689.98 2231.38   1
   2 -13 -14 3761.30 3107.51   1
  -2  13  13 -336.05 2502.09   1
  -2  13  13 1657.27 2262.00   1
   2 -13 -13  -64.47 2217.81   1
   2 -13 -13 3810.02 2973.55   1
  -2  13  12 2893.87 2866.04   1
  -2  13  12 4352.81 2438.76   1
   2 -13 -12 2627.69 2835.77   1
   2 -13 -12  923.80 2820.46   1
  -2  13  11 4993.04 2814.89   1
  -2  13  11    5.54 2394.92   1
   2 -13 -11 -3391.4 2843.77   1
   2 -13 -11  640.22 2667.36   1
  -2  13  10 2279.40 2334.03   1
  -2  13  10 6927.62 2684.41   1
   2 -13 -10 2211.55 2715.38   1
   2 -13 -10  615.52 2921.36   1
  -2  13   9 6022.96 2242.52   1
  -2  13   9 7954.06 1909.18   1
   2 -13  -9 8343.76 2031.31   1
   2 -13  -9 5567.15 2655.88   1
  -2  13   8 -4916.5 2371.61   1
  -2  13   8 3736.95 2331.59   1
   2 -13  -8   57.17 2531.31   1
   2 -13  -8 3335.77 2307.93   1
  -2  13   7  157.72 2544.53   1
  -2  13   7 3782.18 2274.18   1
   2 -13  -7 3910.92 2424.84   1
   2 -13  -7 7087.68 2522.27   1
  -2  13   6 2688.58 1757.83   1
  -2  13   6 1966.25 2225.47   1
   2 -13  -6 3562.98 1612.39   1
   2 -13  -6  790.88 2389.70   1
  -2  13   5 1419.27 2213.99   1
  -2  13   5 4495.47 2616.21   1
   2 -13  -5 4916.49 2204.94   1
   2 -13  -5 5661.09 2318.37   1
  -2  13   4 8375.08 2355.60   1
  -2  13   4 6774.52 2055.67   1
   2 -13  -4 7446.06 2100.21   1
   2 -13  -4 4011.83 2270.00   1
  -2  13   3 1716.07 2513.57   1
  -2  13   3  304.07 1987.12   1
   2 -13  -3 -1213.3 2084.20   1
   2 -13  -3 -1870.6 2087.68   1
  -2  13   2 4568.54 2012.87   1
  -2  13   2 9391.08 2552.89   1
   2 -13  -2 6482.25 2183.02   1
   2 -13  -2 3475.29 2108.56   1
  -2  13   1 -2242.9 1889.70   1
  -2  13   1 -497.56 2221.29   1
   2 -13  -1 -3431.5 1717.47   1
   2 -13  -1 3830.89 2045.58   1
  -2  13   0  519.48 2253.65   1
  -2  13   0 3500.34 2017.74   1
   2 -13   0  461.73 1878.56   1
   2 -13   0 1447.81 1965.20   1
  -2  13  -1 1521.22 2050.45   1
  -2  13  -1  171.22 1806.89   1
   2 -13   1 4244.95 2046.62   1
   2 -13   1  319.69 1853.51   1
  -2  13  -2 1104.38 2003.48   1
  -2  13  -2 1901.18 1989.91   1
   2 -13   2 5574.11 1988.86   1
   2 -13   2 7028.52 2099.51   1
  -2  13  -3 -1077.9 1713.64   1
  -2  13  -3 2535.49 1971.81   1
   2 -13   3  425.89 1922.41   1
   2 -13   3  178.11 1899.79   1
  -2  13  -4 -1653.4 1889.70   1
  -2  13  -4 -711.55 1810.72   1
   2 -13   4 1364.65 1836.12   1
   2 -13   4 2297.49 1849.69   1
  -2  13  -5  18873. 2360.12   1
  -2  13  -5  14377. 1959.98   1
   2 -13   5  16973. 2138.48   1
   2 -13   5  20498. 2341.68   1
  -2  13  -6  13479. 1968.33   1
  -2  13  -6  11663. 2089.77   1
   2 -13   6 8625.60 1854.56   1
   2 -13   6 8385.52 2098.47   1
  -2  13  -7 8956.15 1984.34   1
  -2  13  -7 5598.46 2100.55   1
   2 -13   7 7519.13 1592.55   1
   2 -13   7 8963.11 2069.24   1
  -2  13  -8  53097. 3344.12   1
  -2  13  -8  56437. 3140.57   1
   2 -13   8  59151. 3204.24   1
   2 -13   8  54593. 2903.62   1
  -2  13  -9  123.76 2365.34   1
  -2  13  -9 2827.42 2037.58   1
   2 -13   9 3562.98 1922.75   1
   2 -13   9 5678.49 2328.11   1
  -2  13 -10  14951. 2608.21   1
  -2  13 -10  17937. 2133.26   1
   2 -13  10  15546. 1987.12   1
   2 -13  10  16287. 2569.59   1
  -2  13 -11 1744.61 2023.31   1
  -2  13 -11 5083.50 2490.60   1
   2 -13  11 3545.58 2218.51   1
   2 -13  11 9547.66 2387.26   1
  -2  13 -12  12397. 2701.81   1
  -2  13 -12  12971. 2045.58   1
   2 -13  12  10981. 1990.60   1
   2 -13  12  11987. 2508.35   1
  -2  13 -13 2268.96 2667.71   1
  -2  13 -13  764.44 1941.20   1
   2 -13  13 4140.57 2256.78   1
   2 -13  13 6663.18 2414.05   1
  -2  13 -14 5045.23 2198.68   1
  -2  13 -14 3590.81 2686.15   1
   2 -13  14 5699.37 2429.71   1
   2 -13  14 1828.81 2453.72   1
  -2  13 -15 1875.78 2196.59   1
  -2  13 -15 -385.53 2732.77   1
   2 -13  15 -332.18 1846.55   1
   2 -13  15 1794.36 2492.34   1
  -2  13 -16  100.14 2740.78   1
  -2  13 -16 1920.32 2167.36   1
   2 -13  16 -3851.8 2463.81   1
   2 -13  16  274.39 2509.39   1
  -2  13 -17 2538.97 2916.14   1
  -2  13 -17 -405.01 2557.06   1
   2 -13  17 3324.28 2899.09   1
   2 -13  17  839.25 2551.15   1
  -2  13 -18 -5838.5 3134.65   1
  -2  13 -18 -492.69 2405.01   1
   2 -13  18 -1463.8 2811.41   1
  -2  13 -19  22634. 2657.62   1
  -2  13 -19  23733. 3886.57   1
   2 -13  19  28535. 2988.86   1
   2 -13  19  24422. 3059.15   1
  -2  13 -20  778.70 3105.08   1
  -2  13 -20 1744.61 2352.12   1
   2 -13  20  -55.53 2491.65   1
   2 -13  20 -2909.2 2743.91   1
  -2  12  17  565.07 4001.39   1
  -2  12  17 1577.59 2439.80   1
   2 -12 -17  106.12 3465.55   1
   2 -12 -17 4001.39 2794.36   1
  -2  12  16 9784.26 3164.92   1
  -2  12  16  10289. 3453.37   1
   2 -12 -16 2193.80 3171.19   1
   2 -12 -16 9784.26 3222.68   1
  -2  12  15  233.16 2230.69   1
  -2  12  15 5654.14 3462.42   1
   2 -12 -15 -725.12 3141.96   1
   2 -12 -15 5055.67 3043.84   1
  -2  12  14  -13.09 3099.16   1
  -2  12  14 3660.40 2417.53   1
   2 -12 -14  398.40 2900.83   1
   2 -12 -14 -651.36 2939.45   1
  -2  12  13 2946.07 2416.84   1
  -2  12  13 8054.97 2559.84   1
   2 -12 -13 5173.97 2294.71   1
   2 -12 -13 2716.07 2958.59   1
  -2  12  12 -120.95 2412.66   1
  -2  12  12 1003.48 2449.20   1
   2 -12 -12 2041.40 2123.52   1
   2 -12 -12 -1460.7 2929.71   1
  -2  12  11 5744.60 2470.77   1
  -2  12  11 1803.06 2556.71   1
   2 -12 -11 3987.47 2743.21   1
   2 -12 -11 5768.96 2943.28   1
  -2  12  10 4794.71 2573.76   1
  -2  12  10 -2236.3 2371.26   1
   2 -12 -10 4307.58 2579.33   1
   2 -12 -10 4384.13 2747.39   1
  -2  12   9  40919. 2954.42   1
  -2  12   9  38553. 2977.03   1
   2 -12  -9  34662. 2870.91   1
   2 -12  -9  37056. 3211.55   1
  -2  12   8 4032.70 2288.10   1
  -2  12   8 1665.27 2639.18   1
   2 -12  -8 1719.55 2372.30   1
   2 -12  -8 1958.59 2379.26   1
  -2  12   7  23942. 2513.57   1
  -2  12   7  16973. 2899.79   1
   2 -12  -7  23803. 2117.60   1
   2 -12  -7  18260. 2568.20   1
  -2  12   6 3388.65 2504.87   1
  -2  12   6 5528.87 2165.62   1
   2 -12  -6 6548.36 2352.47   1
   2 -12  -6 6976.33 2108.91   1
  -2  12   5  38587. 2901.18   1
  -2  12   5  40605. 2770.35   1
   2 -12  -5  38344. 2592.20   1
   2 -12  -5  36604. 2818.37   1
  -2  12   4  18198. 2715.72   1
  -2  12   4  15351. 2240.78   1
   2 -12  -4  15988. 2274.88   1
  -2  12   3 3425.19 2070.98   1
  -2  12   3 -1790.9 2353.16   1
   2 -12  -3 1111.69 1970.77   1
   2 -12  -3 4770.35 2172.58   1
  -2  12   2  295.75 2300.97   1
  -2  12   2 -1532.4 1933.19   1
   2 -12  -2 1386.57 1864.30   1
   2 -12  -2 1886.92 1934.93   1
  -2  12   1 3374.74 2185.45   1
  -2  12   1 1529.23 1842.03   1
   2 -12  -1 3250.17 1894.92   1
   2 -12  -1 5212.24 2117.60   1
  -2  12   0 2401.88 1885.52   1
  -2  12   0  221.29 2112.04   1
   2 -12   0 -523.31 1545.93   1
   2 -12   0 -2586.6 1845.16   1
  -2  12  -1 3133.26 1871.26   1
  -2  12  -1 3084.55 1882.39   1
   2 -12   1 -137.65 1812.11   1
   2 -12   1 3129.78 1781.49   1
  -2  12  -2  139.14 1814.89   1
  -2  12  -2 2219.90 1813.50   1
   2 -12   2 2338.90 1768.61   1
   2 -12   2 1124.56 1853.16   1
  -2  12  -3 3482.95 1898.75   1
  -2  12  -3 5828.11 1708.07   1
   2 -12   3 4627.69 1912.32   1
   2 -12   3 5796.79 1985.38   1
  -2  12  -4  28351. 2287.40   1
  -2  12  -4  34864. 2411.97   1
   2 -12   4  30786. 2329.16   1
   2 -12   4  32081. 2318.37   1
  -2  12  -5  28695. 2341.68   1
  -2  12  -5  26496. 2334.03   1
   2 -12   5  26353. 2291.58   1
   2 -12   5  28594. 2528.18   1
  -2  12  -6  43946. 2652.05   1
  -2  12  -6  39353. 2663.53   1
   2 -12   6  36186. 2527.83   1
   2 -12   6  36152. 2520.53   1
  -2  12  -7 2570.28 1881.00   1
  -2  12  -7  678.50 2052.89   1
   2 -12   7  150.45 2009.74   1
  -2  12  -8  13907. 1936.67   1
  -2  12  -8  16729. 2338.20   1
   2 -12   8  11444. 2077.24   1
   2 -12   8  12985. 1812.80   1
  -2  12  -9 -102.85 1922.75   1
  -2  12  -9 -917.19 2229.64   1
   2 -12   9 2438.76 1772.79   1
   2 -12   9 1386.22 1887.96   1
  -2  12 -10  32175. 2537.23   1
  -2  12 -10  37683. 3001.04   1
   2 -12  10  36500. 2667.36   1
   2 -12  10  37335. 2786.01   1
  -2  12 -11  51496. 3420.32   1
  -2  12 -11  52784. 2951.28   1
   2 -12  11  53723. 3223.03   1
   2 -12  11  57307. 2978.77   1
  -2  12 -12 1796.45 2581.42   1
  -2  12 -12 -357.69 2062.63   1
   2 -12  12 -640.22 2146.14   1
   2 -12  12  349.34 2187.54   1
  -2  12 -13 8684.75 2645.79   1
  -2  12 -13  10574. 2081.07   1
   2 -12  13 9331.93 1885.18   1
   2 -12  13 9464.15 2431.10   1
  -2  12 -14 2333.68 2090.81   1
  -2  12 -14 -1460.0 2616.91   1
   2 -12  14 -1749.1 2373.00   1
   2 -12  14 5960.33 2460.33   1
  -2  12 -15 -3698.7 2860.82   1
  -2  12 -15 -716.07 2214.33   1
   2 -12  15 -3653.4 2432.15   1
   2 -12  15 5838.55 2702.15   1
  -2  12 -16  623.87 2839.25   1
  -2  12 -16 -2132.9 1649.27   1
   2 -12  16 -477.04 1893.18   1
   2 -12  16 -234.41 2364.99   1
  -2  12 -17 3059.15 2378.56   1
  -2  12 -17 5337.50 2945.72   1
   2 -12  17 4224.07 2797.14   1
   2 -12  17 5960.33 2566.46   1
  -2  12 -18 7536.53 2491.65   1
  -2  12 -18 5285.31 2862.56   1
   2 -12  18 1985.04 2943.28   1
   2 -12  18 -1076.2 2529.57   1
  -2  12 -19  16862. 3237.99   1
  -2  12 -19  18396. 2569.59   1
   2 -12  19  22049. 2946.76   1
   2 -12  19  21861. 3045.23   1
  -2  12 -20  23354. 3478.08   1
  -2  12 -20  21413. 2561.58   1
   2 -12  20  18653. 2368.13   1
   2 -12  20  15884. 2786.71   1
  -2  12 -21 2404.66 3254.69   1
  -2  12 -21 4077.94 1860.47   1
   2 -12  21 1721.29 2056.71   1
   2 -12  21 3883.09 2742.52   1
  -2  11  19 2115.52 2636.74   1
  -2  11  19 1995.13 3470.77   1
   2 -11 -19 -3030.6 2712.59   1
   2 -11 -19 2328.81 2525.05   1
  -2  11  18 7414.75 3493.39   1
  -2  11  18 5114.82 2692.06   1
   2 -11 -18 2665.62 2664.23   1
   2 -11 -18 2338.20 3067.15   1
  -2  11  17 -2277.7 3389.70   1
  -2  11  17 2055.67 2503.82   1
   2 -11 -17 -815.24 2662.49   1
   2 -11 -17 6026.44 3053.23   1
  -2  11  16 3406.75 2419.27   1
  -2  11  16 2027.83 3140.92   1
   2 -11 -16 -1181.3 2148.57   1
   2 -11 -16 6454.41 2963.11   1
  -2  11  15 5125.26 2348.99   1
  -2  11  15 7752.25 2260.61   1
   2 -11 -15 8239.38 2340.64   1
   2 -11 -15 4585.94 2976.34   1
  -2  11  14  19927. 2892.13   1
  -2  11  14  15390. 2605.08   1
   2 -11 -14  17262. 3140.57   1
   2 -11 -14  18935. 3006.26   1
  -2  11  13 6934.58 2812.11   1
  -2  11  13 2930.76 2398.05   1
   2 -11 -13 8886.56 3061.58   1
   2 -11 -13 7787.05 2972.51   1
  -2  11  12 -1384.1 2558.45   1
  -2  11  12 -341.96 2544.53   1
   2 -11 -12 2185.80 2668.06   1
   2 -11 -12 -2170.8 2763.05   1
  -2  11  11 3134.30 2408.84   1
  -2  11  11 1950.24 2405.01   1
   2 -11 -11 6882.39 1938.76   1
   2 -11 -11 2151.70 2711.55   1
  -2  11  10 4161.44 2825.68   1
  -2  11  10  978.43 2360.82   1
   2 -11 -10 -607.17 2568.54   1
   2 -11 -10 4039.66 2589.77   1
  -2  11   9  46347. 2910.92   1
  -2  11   9  44850. 2864.30   1
   2 -11  -9  45233. 2737.99   1
   2 -11  -9  50626. 3503.82   1
  -2  11   8  39909. 2902.22   1
  -2  11   8  40257. 3123.52   1
   2 -11  -8  38031. 2862.56   1
   2 -11  -8  37891. 3074.81   1
  -2  11   7  41788. 2889.00   1
  -2  11   7  41823. 2989.91   1
   2 -11  -7  45303. 2859.43   1
   2 -11  -7  42589. 3083.85   1
  -2  11   6 4565.06 2211.55   1
  -2  11   6 2455.11 1932.50   1
   2 -11  -6 4585.94 2364.30   1
   2 -11  -6 5737.64 1933.54   1
  -2  11   5 1960.68 2490.60   1
  -2  11   5 2254.70 1932.84   1
   2 -11  -5 5775.92 2067.50   1
   2 -11  -5  883.44 2335.77   1
  -2  11   4 6231.73 2383.09   1
  -2  11   4 -476.34 1833.68   1
   2 -11  -4 -498.96 1903.62   1
   2 -11  -4 -440.50 2256.43   1
  -2  11   3 3914.40 2037.92   1
  -2  11   3 7804.45 2227.56   1
   2 -11  -3 3698.67 1923.80   1
   2 -11  -3 6287.40 2147.53   1
  -2  11   2  34934. 2713.64   1
  -2  11   2  42067. 2660.75   1
   2 -11  -2  41649. 2521.57   1
   2 -11  -2  47286. 2922.41   1
  -2  11   1  15752. 2181.63   1
  -2  11   1  17561. 2118.30   1
   2 -11  -1  17784. 2061.93   1
   2 -11  -1  16983. 1942.24   1
  -2  11   0  12888. 1907.10   1
  -2  11   0  13640. 2324.98   1
   2 -11   0  11969. 2161.45   1
   2 -11   0 9679.88 1884.13   1
  -2  11  -1  46660. 2628.04   1
  -2  11  -1  47530. 2953.72   1
   2 -11   1  47704. 2922.75   1
   2 -11   1  45372. 2646.83   1
  -2  11  -2 -204.98 1934.93   1
  -2  11  -2 1951.98 1479.12   1
   2 -11   2 -1916.8 1550.45   1
   2 -11   2 1086.99 1843.77   1
  -2  11  -3  368.13 2047.67   1
  -2  11  -3 2003.48 1497.56   1
   2 -11   3  453.37 1645.09   1
   2 -11   3 -764.79 1668.40   1
  -2  11  -4 4989.56 1987.47   1
  -2  11  -4 1425.19 1565.76   1
   2 -11   4 4864.30 1703.20   1
   2 -11   4 2485.04 1916.49   1
  -2  11  -5 1304.10 1597.08   1
  -2  11  -5  437.37 1962.42   1
   2 -11   5 1724.42 1751.91   1
   2 -11   5  199.30 1789.49   1
  -2  11  -6 7233.81 1715.38   1
  -2  11  -6 4659.01 1921.71   1
   2 -11   6  10056. 1973.55   1
   2 -11   6 8027.13 1906.40   1
  -2  11  -7  69207. 3377.52   1
  -2  11  -7  70355. 3594.29   1
   2 -11   7  71364. 3559.50   1
  -2  11  -8 2924.14 1812.80   1
  -2  11  -8 -718.86 2101.25   1
   2 -11   8 1465.90 1915.10   1
   2 -11   8 -544.88 1674.32   1
  -2  11  -9  21353. 2067.50   1
  -2  11  -9  19523. 2553.23   1
   2 -11   9  20501. 1854.21   1
   2 -11   9  19729. 2163.53   1
  -2  11 -10  14565. 1972.16   1
  -2  11 -10  15157. 2413.71   1
   2 -11  10  11009. 1792.97   1
   2 -11  10 8883.08 2120.04   1
  -2  11 -11 9551.14 2394.57   1
  -2  11 -11  16928. 2157.62   1
   2 -11  11  18987. 2207.72   1
   2 -11  11  18563. 2249.13   1
  -2  11 -12 2249.48 1931.10   1
  -2  11 -12 7164.22 2437.37   1
   2 -11  12 1645.79 2010.44   1
   2 -11  12 4119.69 2200.76   1
  -2  11 -13  17982. 2820.11   1
  -2  11 -13  18212. 2303.06   1
   2 -11  13  16611. 2288.79   1
   2 -11  13  16910. 1971.47   1
  -2  11 -14 4770.35 2497.91   1
  -2  11 -14 6454.41 2333.33   1
   2 -11  14 1607.17 2405.36   1
   2 -11  14 2147.53 2330.55   1
  -2  11 -15 2701.81 2602.99   1
  -2  11 -15 1260.96 2196.59   1
   2 -11  15 2796.80 2194.50   1
   2 -11  15 1399.09 2381.70   1
  -2  11 -16  14402. 2840.29   1
  -2  11 -16  10188. 2082.81   1
   2 -11  16  16614. 2691.72   1
   2 -11  16  12926. 2628.39   1
  -2  11 -17 7306.88 2801.67   1
  -2  11 -17 1499.30 2214.68   1
   2 -11  17 1247.04 2723.03   1
   2 -11  17 -1469.7 2581.76   1
  -2  11 -18  18497. 2440.85   1
  -2  11 -18  22206. 3229.99   1
   2 -11  18  14001. 2567.85   1
   2 -11  18  12884. 2779.75   1
  -2  11 -19 9958.24 1980.17   1
  -2  11 -19 8114.12 2637.09   1
   2 -11  19 5389.70 2094.29   1
   2 -11  19 7164.22 2627.69   1
  -2  11 -20 -1280.1 2876.13   1
  -2  11 -20 -1831.9 2159.71   1
   2 -11  20  441.20 2664.92   1
   2 -11  20 -2559.5 2119.00   1
  -2  11 -21 5264.44 2358.38   1
  -2  11 -21 -1915.1 3046.97   1
   2 -11  21 -657.27 2640.92   1
   2 -11  21 2980.16 2712.25   1
  -2  11 -22 8709.11 3048.01   1
  -2  11 -22 4784.27 2747.39   1
   2 -11  22  10772. 2666.66   1
   2 -11  22 6816.28 3141.26   1
  -2  11 -23 6026.44 2925.88   1
  -2  11 -23 5400.13 2865.69   1
   2 -11  23 7369.51 3143.35   1
   2 -11  23 1517.40 2923.80   1
  -2  10  20 -1113.1 2806.54   1
  -2  10  20 -954.07 3012.18   1
   2 -10 -20 -1333.3 2258.87   1
   2 -10 -20 -503.13 3141.96   1
  -2  10  19 6054.27 2947.11   1
  -2  10  19  510.44 2663.88   1
   2 -10 -19 9262.34 2798.19   1
   2 -10 -19 8778.70 3240.78   1
  -2  10  18 1889.70 2525.75   1
  -2  10  18  556.71 2225.12   1
   2 -10 -18 4575.50 2133.26   1
   2 -10 -18   31.59 3122.47   1
  -2  10  17 9512.86 2631.87   1
  -2  10  17 6482.25 2421.36   1
   2 -10 -17 6050.79 2156.92   1
   2 -10 -17 8162.83 3187.89   1
  -2  10  16 4822.54 2530.96   1
  -2  10  16  719.21 2229.29   1
   2 -10 -16  741.13 2117.95   1
   2 -10 -16 6151.70 3003.82   1
  -2  10  15 -1023.3 2749.48   1
  -2  10  15  886.92 2517.05   1
   2 -10 -15 1732.43 3000.35   1
   2 -10 -15   15.78 2815.24   1
  -2  10  14 5748.08 2402.92   1
  -2  10  14 2466.25 2896.31   1
   2 -10 -14 5758.52 2941.54   1
   2 -10 -14 5170.49 2662.14   1
  -2  10  13 6610.99 2821.15   1
  -2  10  13 4133.61 2103.69   1
   2 -10 -13 7032.00 2557.06   1
   2 -10 -13 5636.74 2773.83   1
  -2  10  12 7230.33 2089.07   1
  -2  10  12 6530.96 2151.70   1
   2 -10 -12 6732.77 2065.76   1
   2 -10 -12 1447.46 2525.05   1
  -2  10  11  18664. 2970.42   1
  -2  10  11  18587. 2372.30   1
   2 -10 -11  17376. 3189.28   1
   2 -10 -11  18629. 2431.80   1
  -2  10  10 6430.06 2408.49   1
  -2  10  10  655.18 2157.97   1
   2 -10 -10 5960.33 1796.10   1
   2 -10 -10  749.13 2359.78   1
  -2  10   9 2885.52 2705.98   1
  -2  10   9 1060.19 2384.13   1
   2 -10  -9 2093.94 2471.47   1
   2 -10  -9 -2131.2 2332.64   1
  -2  10   8 2323.59 2012.18   1
  -2  10   8 -3636.0 2459.29   1
   2 -10  -8 1750.87 2006.96   1
   2 -10  -8 -2870.2 2242.86   1
  -2  10   7 -1999.3 2056.02   1
  -2  10   7 -3265.5 2108.21   1
   2 -10  -7 -653.79 1521.22   1
   2 -10  -7 -803.06 2252.96   1
  -2  10   6 1153.44 1874.74   1
  -2  10   6 6576.19 2094.64   1
   2 -10  -6 -2486.4 2262.70   1
   2 -10  -6 -148.96 1753.30   1
  -2  10   5  626.30 1720.60   1
  -2  10   5 4244.95 2331.24   1
   2 -10  -5 1201.46 1930.41   1
   2 -10  -5 3775.22 2033.75   1
  -2  10   4 1307.24 2219.90   1
  -2  10   4 5107.86 1809.67   1
   2 -10  -4 4839.94 1896.31   1
   2 -10  -4 2901.53 1962.42   1
  -2  10   3  41023. 2921.01   1
  -2  10   3  40362. 2510.78   1
   2 -10  -3  44920. 2806.54   1
   2 -10  -3  39944. 2647.53   1
  -2  10   2 -1508.0 2039.66   1
  -2  10   2 2837.51 1742.17   1
   2 -10  -2 -583.85 1771.40   1
   2 -10  -2 4784.27 1882.04   1
  -2  10   1 9036.18 2187.54   1
  -2  10   1 4665.97 1884.83   1
   2 -10  -1 4307.58 1882.04   1
   2 -10  -1 8764.78 2016.00   1
  -2  10   0  15198. 2239.04   1
  -2  10   0  17871. 1926.23   1
   2 -10   0  13305. 2010.44   1
   2 -10   0  17940. 2093.94   1
  -2  10  -1  11524. 1821.15   1
  -2  10  -1  15379. 2113.78   1
   2 -10   1 9384.12 1890.05   1
   2 -10   1  11583. 2008.35   1
  -2  10  -2  20327. 2041.06   1
  -2  10  -2  19179. 2143.35   1
   2 -10   2  21183. 2061.58   1
   2 -10   2  17971. 2088.72   1
  -2  10  -3  13434. 2025.40   1
  -2  10  -3  10748. 1721.64   1
   2 -10   3 9286.70 1881.70   1
   2 -10   3  10202. 1796.45   1
  -2  10  -4 7122.47 1732.43   1
  -2  10  -4 8823.93 2125.26   1
   2 -10   4 3436.32 1640.22   1
   2 -10   4 8347.24 1920.32   1
  -2  10  -5 4606.81 2182.67   1
  -2  10  -5 7143.35 1818.02   1
   2 -10   5 1863.95 2007.30   1
   2 -10   5 5542.79 1794.01   1
  -2  10  -6 2824.63 1930.76   1
  -2  10  -6 1918.23 1762.35   1
   2 -10   6 3389.70 1751.91   1
   2 -10   6 2298.88 1935.63   1
  -2  10  -7  329.89 2035.84   1
  -2  10  -7  337.44 1776.96   1
   2 -10   7 1845.86 1266.18   1
   2 -10   7  377.52 1720.94   1
  -2  10  -8  28716. 2530.96   1
  -2  10  -8  29537. 2143.35   1
   2 -10   8  22971. 1884.83   1
   2 -10   8  26771. 2250.87   1
  -2  10  -9 2592.90 2066.80   1
  -2  10  -9 1392.14 1516.35   1
   2 -10   9 -2188.6 1462.42   1
   2 -10   9 3757.83 1877.87   1
  -2  10 -10  39040. 2410.58   1
  -2  10 -10  36012. 2777.66   1
   2 -10  10  41788. 2354.21   1
   2 -10  10  37787. 2702.50   1
  -2  10 -11  291.96 1866.73   1
  -2  10 -11   73.73 2287.75   1
   2 -10  11 3876.13 1852.47   1
   2 -10  11 3309.67 2232.08   1
  -2  10 -12 3604.73 2424.49   1
  -2  10 -12 4773.83 1925.54   1
   2 -10  12 6583.15 1954.42   1
   2 -10  12 5393.17 2069.59   1
  -2  10 -13 -2576.2 1782.18   1
  -2  10 -13 -1941.5 2343.07   1
   2 -10  13  333.16 1931.45   1
   2 -10  13 -1121.8 2099.16   1
  -2  10 -14  30473. 2953.37   1
  -2  10 -14  36674. 2843.07   1
   2 -10  14  27850. 2554.28   1
   2 -10  14  29301. 2589.42   1
  -2  10 -15  11858. 2600.21   1
  -2  10 -15  19008. 2379.61   1
   2 -10  15  20863. 2687.54   1
   2 -10  15  12091. 2276.27   1
  -2  10 -16  10411. 2633.96   1
  -2  10 -16  13500. 2414.05   1
   2 -10  16  10289. 2635.35   1
   2 -10  16 7954.06 2328.11   1
  -2  10 -17 -211.62 2587.33   1
  -2  10 -17 -595.68 1568.89   1
   2 -10  17 1208.77 2302.71   1
   2 -10  17  505.91 2030.27   1
  -2  10 -18 -1017.7 2698.68   1
  -2  10 -18 1550.10 2247.39   1
   2 -10  18 1012.53 3007.65   1
   2 -10  18  211.24 2519.83   1
  -2  10 -19 -2659.4 2410.92   1
  -2  10 -19 -3754.3 2763.74   1
   2 -10  19 3162.14 2792.97   1
   2 -10  19 2421.71 2660.05   1
  -2  10 -20  18208. 2621.43   1
  -2  10 -20  15832. 2718.51   1
   2 -10  20  14516. 2625.95   1
   2 -10  20  11663. 2737.65   1
  -2  10 -21 1083.16 2693.80   1
  -2  10 -21 1101.95 2445.02   1
   2 -10  21 7045.92 2623.87   1
   2 -10  21 -3239.4 2242.52   1
  -2  10 -22  900.14 1862.91   1
  -2  10 -22  10177. 3283.92   1
   2 -10  22 1811.76 2135.70   1
   2 -10  22 1706.68 2782.88   1
  -2  10 -23 7633.95 2814.19   1
  -2  10 -23 3493.39 2051.49   1
   2 -10  23 -1209.1 2663.18   1
   2 -10  23 6962.42 2262.70   1
  -2  10 -24  12526. 2863.25   1
  -2  10 -24  12693. 2281.14   1
   2 -10  24  18511. 2400.14   1
   2 -10  24  19186. 2872.30   1
  -2   9  21 -1800.6 2606.47   1
  -2   9  21 -787.40 2848.29   1
   2  -9 -21 -7209.5 2774.88   1
   2  -9 -21 4297.14 2944.67   1
  -2   9  20 2672.23 2994.78   1
  -2   9  20 1808.98 2544.88   1
   2  -9 -20  372.65 2729.64   1
   2  -9 -20  252.09 2872.65   1
  -2   9  19 1371.95 3213.29   1
  -2   9  19 2168.40 2523.31   1
   2  -9 -19 1406.05 2709.46   1
   2  -9 -19 -2081.8 2979.12   1
  -2   9  18  10038. 2658.31   1
  -2   9  18  11938. 3264.78   1
   2  -9 -18 8691.71 2390.05   1
   2  -9 -18 4655.53 3139.87   1
  -2   9  17 2853.51 2561.93   1
  -2   9  17 8395.96 3206.68   1
   2  -9 -17 6189.97 2549.41   1
   2  -9 -17 9505.91 3115.86   1
  -2   9  16  12147. 2408.49   1
  -2   9  16  10964. 2632.22   1
   2  -9 -16  16486. 3097.42   1
   2  -9 -16  15915. 2244.95   1
  -2   9  15 2951.63 2513.92   1
  -2   9  15 -2270.0 2121.08   1
   2  -9 -15  737.65 2017.74   1
   2  -9 -15 3313.84 2843.42   1
  -2   9  14 9996.51 2837.51   1
  -2   9  14 5619.34 2649.96   1
   2  -9 -14  13058. 2879.96   1
   2  -9 -14  12276. 2870.21   1
  -2   9  13  14701. 3101.25   1
  -2   9  13  11374. 2592.20   1
   2  -9 -13 9039.66 2843.07   1
   2  -9 -13 6725.81 2677.80   1
  -2   9  12 6116.90 2032.70   1
  -2   9  12 4460.68 2407.10   1
   2  -9 -12 5340.98 1987.82   1
   2  -9 -12 4356.29 2453.02   1
  -2   9  11 7748.77 2894.22   1
  -2   9  11 2705.98 2266.53   1
   2  -9 -11 -943.28 2786.36   1
   2  -9 -11 6036.88 2445.02   1
  -2   9  10 2132.91 2315.93   1
  -2   9  10 3604.73 2099.86   1
   2  -9 -10  -78.95 1733.47   1
   2  -9 -10 4283.22 2291.93   1
  -2   9   9 3649.96 2021.92   1
  -2   9   9 4178.84 2373.00   1
   2  -9  -9 3865.69 2229.99   1
   2  -9  -9 4606.81 2078.63   1
  -2   9   8  521.92 1717.47   1
  -2   9   8 5107.86 2328.46   1
   2  -9  -8 -882.74 2089.07   1
   2  -9  -8  807.58 1846.55   1
  -2   9   7  43041. 3081.42   1
  -2   9   7  38935. 2650.31   1
   2  -9  -7  40814. 2694.85   1
   2  -9  -7  39631. 2744.60   1
  -2   9   6 2771.40 1679.19   1
  -2   9   6  802.71 2268.61   1
   2  -9  -6 2180.58 1943.98   1
   2  -9  -6  376.48 1892.13   1
  -2   9   5  11802. 2400.48   1
  -2   9   5  10943. 1799.23   1
   2  -9  -5 9422.40 2027.83   1
   2  -9  -5  13869. 2041.40   1
  -2   9   4  11051. 2135.35   1
  -2   9   4 7188.58 1776.27   1
   2  -9  -4 6089.07 1723.03   1
  -2   9   3  54001. 3152.75   1
  -2   9   3  51914. 2767.57   1
   2  -9  -3  55463. 2914.40   1
   2  -9  -3  49722. 2945.02   1
  -2   9   2 187091. 7237.29   1
  -2   9   2 174704. 6645.78   1
   2  -9  -2 185456. 7077.24   1
   2  -9  -2 175122. 6764.08   1
  -2   9   1  72756. 3559.50   1
  -2   9   1  69276. 3384.13   1
   2  -9  -1  65310. 3257.48   1
   2  -9  -1  66806. 3387.96   1
  -2   9   0  24722. 2088.38   1
  -2   9   0  23128. 2205.63   1
   2  -9   0  25752. 2215.03   1
   2  -9   0  27373. 2272.09   1
  -2   9  -1 1669.10 1635.35   1
  -2   9  -1 -872.30 1707.37   1
   2  -9   1 -1150.0 1503.83   1
   2  -9   1 -1437.0 1786.71   1
  -2   9  -2 1924.15 1703.20   1
  -2   9  -2  176.97 1606.82   1
   2  -9   2  921.71 1694.50   1
   2  -9   2 2510.44 1696.94   1
  -2   9  -3 1504.17 1651.70   1
  -2   9  -3 3573.41 1817.67   1
   2  -9   3 2882.39 1698.33   1
   2  -9   3 1562.63 1727.56   1
  -2   9  -4  84273. 3782.18   1
  -2   9  -4  83020. 3611.69   1
   2  -9   4  87857. 3980.51   1
   2  -9   4  78984. 3538.62   1
  -2   9  -5  181.28 1969.03   1
  -2   9  -5 1597.08 1649.62   1
   2  -9   5  149.90 1726.16   1
   2  -9   5 -870.21 1828.46   1
  -2   9  -6  78288. 3771.74   1
  -2   9  -6  78114. 3493.39   1
   2  -9   6  82498. 3677.80   1
   2  -9   6  84795. 3778.70   1
  -2   9  -7 1196.94 1894.22   1
  -2   9  -7 2869.52 1748.78   1
   2  -9   7 2225.47 1746.00   1
   2  -9   7 3013.92 1710.16   1
  -2   9  -8  14012. 2160.05   1
  -2   9  -8 9784.26 1617.26   1
   2  -9   8  11037. 1598.12   1
   2  -9   8 9620.73 1861.52   1
  -2   9  -9 4171.88 1585.94   1
  -2   9  -9 4502.43 2032.70   1
   2  -9   9 3862.21 1618.30   1
   2  -9   9 5198.32 1854.21   1
  -2   9 -10 2841.68 1716.42   1
  -2   9 -10 6597.07 2018.09   1
   2  -9  10 1748.08 1800.28   1
   2  -9  10 4304.10 1775.57   1
  -2   9 -11  15574. 2179.19   1
  -2   9 -11  18006. 1962.77   1
   2  -9  11  15139. 2019.14   1
   2  -9  11  19130. 2051.49   1
  -2   9 -12 -870.91 1516.00   1
  -2   9 -12 1698.33 2190.67   1
   2  -9  12 -1177.5 1591.51   1
   2  -9  12 -572.02 1615.52   1
  -2   9 -13  88100. 4255.39   1
  -2   9 -13  77488. 3583.85   1
   2  -9  13  79332. 3865.69   1
   2  -9  13  83055. 3695.19   1
  -2   9 -14  42797. 3037.58   1
  -2   9 -14  38518. 2775.22   1
   2  -9  14  41023. 3043.14   1
   2  -9  14  44224. 2950.94   1
  -2   9 -15  23083. 2729.64   1
  -2   9 -15  25498. 2094.29   1
   2  -9  15  25672. 2579.68   1
   2  -9  15  26134. 2411.62   1
  -2   9 -16 1143.35 2479.82   1
  -2   9 -16 1048.36 2263.74   1
   2  -9  16  939.80 2533.05   1
   2  -9  16 4464.16 2056.37   1
  -2   9 -17 8315.93 2525.05   1
  -2   9 -17  11364. 1755.04   1
   2  -9  17 8263.74 1921.71   1
   2  -9  17 9405.00 2397.70   1
  -2   9 -18  12630. 2361.17   1
  -2   9 -18  10397. 2719.90   1
   2  -9  18  12533. 2696.94   1
   2  -9  18 9745.99 2625.95   1
  -2   9 -19 -747.04 2376.13   1
  -2   9 -19 2518.44 2676.75   1
   2  -9  19 6238.69 2705.63   1
   2  -9  19 1785.31 2566.80   1
  -2   9 -20  19123. 3085.24   1
  -2   9 -20  18643. 2543.14   1
   2  -9  20  18667. 3046.27   1
   2  -9  20  16573. 2921.36   1
  -2   9 -21  34829. 3035.14   1
  -2   9 -21  43354. 3556.02   1
   2  -9  21  42832. 3205.98   1
   2  -9  21  40118. 3357.34   1
  -2   9 -22 -2897.7 2732.77   1
  -2   9 -22 2873.00 2538.97   1
   2  -9  22 -890.05 2601.25   1
   2  -9  22 4373.69 2637.44   1
  -2   9 -23 5163.53 3535.14   1
  -2   9 -23 -1325.3 2615.86   1
   2  -9  23 -924.15 2622.82   1
   2  -9  23 3296.80 2671.19   1
  -2   9 -24 -2130.1 2719.90   1
  -2   9 -24 4495.47 2954.76   1
   2  -9  24 -398.40 2980.51   1
   2  -9  24 -545.93 2784.97   1
  -2   9 -25 9676.40 3120.73   1
   2  -9  25 2697.28 2926.23   1
  -2   8  23 -3029.2 2699.72   1
   2  -8 -23  487.82 2087.33   1
  -2   8  22 8333.33 3147.87   1
  -2   8  22 1204.59 2903.62   1
   2  -8 -22  12119. 3148.92   1
   2  -8 -22  940.85 3230.34   1
  -2   8  21 5233.12 2716.42   1
  -2   8  21 5316.63 3230.69   1
   2  -8 -21 3035.84 3134.30   1
   2  -8 -21 4091.85 3138.13   1
  -2   8  20 2629.09 2629.78   1
  -2   8  20 -326.76 3007.65   1
   2  -8 -20 4032.70 2935.63   1
   2  -8 -20 6280.44 3187.19   1
  -2   8  19 1680.23 2865.34   1
  -2   8  19  345.96 2594.99   1
   2  -8 -19 -313.92 3129.43   1
   2  -8 -19 -501.04 2679.54   1
  -2   8  18 4763.39 2522.27   1
  -2   8  18 5045.23 2964.16   1
   2  -8 -18 4961.72 2932.50   1
   2  -8 -18 8493.38 3273.48   1
  -2   8  17 -2542.8 2988.86   1
  -2   8  17  622.13 2441.54   1
   2  -8 -17 8611.68 3205.98   1
   2  -8 -17 5295.75 2721.29   1
  -2   8  16 2002.43 3202.85   1
  -2   8  16 -573.42 2613.78   1
   2  -8 -16 3239.38 2802.02   1
   2  -8 -16 1089.07 3066.11   1
  -2   8  15  998.61 3729.99   1
  -2   8  15 1964.86 2136.74   1
   2  -8 -15 4679.88 2825.68   1
   2  -8 -15 4794.71 2629.78   1
  -2   8  14 4161.44 2813.85   1
  -2   8  14  886.92 2514.96   1
   2  -8 -14 2657.62 2419.27   1
   2  -8 -14 -3282.5 2783.57   1
  -2   8  13 9147.52 2246.34   1
  -2   8  13 5935.97 2445.72   1
   2  -8 -13 7261.65 2108.56   1
   2  -8 -13  10932. 2979.47   1
  -2   8  12  24892. 2631.87   1
  -2   8  12  24005. 3119.69   1
   2  -8 -12  29429. 3118.65   1
   2  -8 -12  22926. 2835.42   1
  -2   8  11  24405. 2614.82   1
  -2   8  11  25188. 2669.45   1
   2  -8 -11  24443. 2687.19   1
   2  -8 -11  23090. 2677.80   1
  -2   8  10 9512.86 2390.05   1
  -2   8  10  10585. 1968.33   1
   2  -8 -10  10793. 2067.15   1
   2  -8 -10 6057.75 2151.70   1
  -2   8   9 -4168.4 1805.15   1
  -2   8   9  155.53 2377.52   1
   2  -8  -9 -1085.9 2173.28   1
   2  -8  -9 2828.46 1896.66   1
  -2   8   8 7073.76 2348.29   1
  -2   8   8 4732.08 1822.89   1
   2  -8  -8 7185.10 2081.07   1
   2  -8  -8 7947.10 2109.95   1
  -2   8   7  28963. 2622.13   1
  -2   8   7  23838. 2114.47   1
   2  -8  -7  32575. 2483.99   1
   2  -8  -7  28566. 2376.48   1
  -2   8   6  24586. 2472.86   1
  -2   8   6  22533. 2027.14   1
   2  -8  -6  22592. 2082.46   1
   2  -8  -6  21315. 2128.74   1
  -2   8   5  10745. 2042.10   1
  -2   8   5 8535.13 1779.05   1
   2  -8  -5  13667. 1800.97   1
   2  -8  -5  12954. 1981.21   1
  -2   8   4  43250. 2905.70   1
  -2   8   4  42971. 2506.26   1
   2  -8  -4  42450. 2571.67   1
   2  -8  -4  46729. 2790.53   1
  -2   8   3  551.84 1656.57   1
  -2   8   3 -1550.5 2031.31   1
   2  -8  -3 2142.66 1773.14   1
   2  -8  -3 2687.89 1791.93   1
  -2   8   2 8336.80 1762.70   1
  -2   8   2 6847.59 2007.65   1
   2  -8  -2 7574.80 1772.44   1
   2  -8  -2 8604.72 1862.21   1
  -2   8   1  19290. 2316.98   1
  -2   8   1  13305. 2026.79   1
   2  -8  -1  14725. 2049.06   1
   2  -8  -1  15407. 1803.06   1
  -2   8   0  14454. 1781.49   1
  -2   8   0  10285. 1907.44   1
   2  -8   0  12627. 1843.07   1
   2  -8   0  14061. 1971.47   1
  -2   8  -1  10070. 1879.61   1
  -2   8  -1  11051. 1760.26   1
   2  -8   1  13229. 1931.10   1
   2  -8   1  10912. 1823.24   1
  -2   8  -2 -115.59 1744.61   1
  -2   8  -2 1753.65 1643.35   1
   2  -8   2 -729.99 1647.88   1
   2  -8   2 -722.69 1659.01   1
  -2   8  -3 1829.85 1919.27   1
  -2   8  -3  665.97 1643.00   1
   2  -8   3 2335.07 1617.60   1
   2  -8   3 5334.02 1718.86   1
  -2   8  -4 -1728.6 1969.38   1
  -2   8  -4 1909.18 1598.47   1
   2  -8   4 2629.78 1635.70   1
   2  -8   4  822.20 1711.20   1
  -2   8  -5 172060. 6656.22   1
  -2   8  -5 178566. 6753.65   1
   2  -8   5 169380. 6433.54   1
   2  -8   5 185386. 7025.05   1
  -2   8  -6 4196.24 1599.51   1
  -2   8  -6 2446.07 1824.63   1
   2  -8   6 3823.94 1673.28   1
   2  -8   6 2762.35 1653.44   1
  -2   8  -7  47982. 2505.91   1
  -2   8  -7  42310. 2612.04   1
   2  -8   7  44885. 2433.54   1
   2  -8   7  45546. 2576.55   1
  -2   8  -8  574.46 1776.96   1
  -2   8  -8  -98.29 1890.39   1
   2  -8   8 -1324.6 1686.85   1
   2  -8   8  364.65 1798.88   1
  -2   8  -9  35073. 2191.02   1
  -2   8  -9  35769. 2483.30   1
   2  -8   9  40779. 2341.68   1
   2  -8   9  39701. 2447.81   1
  -2   8 -10  274.53 1868.47   1
  -2   8 -10 7160.74 1570.98   1
   2  -8  10  867.43 1726.16   1
   2  -8  10 2804.45 1686.50   1
  -2   8 -11 -1287.1 1868.82   1
  -2   8 -11 -968.34 1680.58   1
   2  -8  11 3224.77 1812.45   1
   2  -8  11  724.77 1737.30   1
  -2   8 -12 2263.39 1856.64   1
  -2   8 -12 2191.37 1909.53   1
   2  -8  12 5320.11 2036.88   1
   2  -8  12 4102.29 1757.48   1
  -2   8 -13  459.99 1949.55   1
  -2   8 -13 4572.02 1786.36   1
   2  -8  13  633.61 1958.24   1
   2  -8  13 3371.60 1865.34   1
  -2   8 -14 4860.82 2319.07   1
  -2   8 -14 4311.06 1789.49   1
   2  -8  14 1451.63 1662.49   1
   2  -8  14 -882.39 2117.26   1
  -2   8 -15  226.79 2069.24   1
  -2   8 -15  285.49 2266.53   1
   2  -8  15 5922.05 2441.19   1
   2  -8  15 3067.15 2079.68   1
  -2   8 -16  12380. 1701.11   1
  -2   8 -16  14746. 2692.41   1
   2  -8  16  17690. 2338.90   1
   2  -8  16  10825. 2417.19   1
  -2   8 -17  46764. 3330.55   1
  -2   8 -17  54941. 3219.55   1
   2  -8  17  52923. 3323.24   1
   2  -8  17  46625. 3313.84   1
  -2   8 -18 1756.78 2402.57   1
  -2   8 -18 2784.97 2596.73   1
   2  -8  18 -1027.8 2559.15   1
   2  -8  18 2032.70 2418.58   1
  -2   8 -19  177.52 2794.71   1
  -2   8 -19 1572.37 2223.38   1
   2  -8  19 1167.01 2479.47   1
   2  -8  19 2990.25 2436.32   1
  -2   8 -20  38379. 3482.95   1
  -2   8 -20  36848. 2842.38   1
   2  -8  20  42241. 3073.41   1
   2  -8  20  32996. 3183.71   1
  -2   8 -21 2514.61 2838.55   1
  -2   8 -21 2769.66 1847.95   1
   2  -8  21 1507.65 1950.59   1
   2  -8  21 -1703.2 2863.25   1
  -2   8 -22  907.10 2767.57   1
  -2   8 -22 2244.95 2041.75   1
   2  -8  22 1358.04 1929.36   1
   2  -8  22 -462.77 2757.83   1
  -2   8 -23 1881.35 2778.35   1
  -2   8 -23 3810.02 2670.49   1
   2  -8  23 2882.74 2546.97   1
   2  -8  23 2358.73 2843.07   1
  -2   8 -24 1870.91 2981.21   1
  -2   8 -24  -32.40 3311.06   1
   2  -8  24 -217.43 2790.53   1
   2  -8  24 2223.38 2783.57   1
  -2   8 -25 -5501.0 3343.77   1
  -2   8 -25  402.92 2723.38   1
   2  -8  25 1936.32 3208.07   1
   2  -8  25 -3149.3 2863.25   1
  -2   7  23   38.45 3072.02   1
  -2   7  23  873.00 2984.34   1
   2  -7 -23 -2638.5 3338.20   1
   2  -7 -23 2636.39 3281.49   1
  -2   7  22 2459.29 2562.28   1
  -2   7  22  437.37 2168.75   1
   2  -7 -22 6530.96 2776.62   1
   2  -7 -22 3253.65 3160.75   1
  -2   7  21 -214.44 2712.59   1
  -2   7  21 -848.64 2194.50   1
   2  -7 -21 3080.72 3183.36   1
   2  -7 -21 3437.37 2126.65   1
  -2   7  20 9272.78 3056.71   1
  -2   7  20 5156.57 2408.49   1
   2  -7 -20 2965.55 2584.90   1
   2  -7 -20 4244.95 3022.61   1
  -2   7  19 6443.97 2859.43   1
  -2   7  19 5160.05 2480.86   1
   2  -7 -19 4123.17 2780.79   1
   2  -7 -19 4418.92 3096.73   1
  -2   7  18 6868.47 2919.27   1
  -2   7  18  10212. 2374.39   1
   2  -7 -18 9018.78 2831.94   1
   2  -7 -18 1145.44 3040.36   1
  -2   7  17 -326.10 3163.18   1
  -2   7  17 3576.89 2568.20   1
   2  -7 -17 2664.92 2730.34   1
   2  -7 -17 5929.01 3083.50   1
  -2   7  16 2877.17 2624.91   1
  -2   7  16 -2114.1 3210.50   1
   2  -7 -16 3105.08 2628.74   1
   2  -7 -16   26.16 3026.09   1
  -2   7  15 -1636.0 2272.09   1
  -2   7  15 -7578.3 3047.67   1
   2  -7 -15  168.41 2492.34   1
   2  -7 -15 -494.43 2581.07   1
  -2   7  14  38065. 2907.10   1
  -2   7  14  37300. 3009.04   1
   2  -7 -14  39074. 3446.41   1
   2  -7 -14  34433. 2568.20   1
  -2   7  13 3625.61 2242.52   1
  -2   7  13 1442.59 2669.45   1
   2  -7 -13 7237.29 2533.75   1
   2  -7 -13 -1815.6 2618.30   1
  -2   7  12 -804.45 2590.81   1
  -2   7  12  914.75 1894.57   1
   2  -7 -12 2224.77 2409.18   1
   2  -7 -12 4008.35 2494.08   1
  -2   7  11  12641. 2366.04   1
  -2   7  11 9018.78 1947.46   1
   2  -7 -11 6976.33 2233.47   1
   2  -7 -11  10324. 2150.31   1
  -2   7  10  17669. 1953.03   1
  -2   7  10  18072. 2105.77   1
   2  -7 -10  19485. 1919.97   1
   2  -7 -10  21698. 2408.14   1
  -2   7   9 4098.81 2162.49   1
  -2   7   9 2904.66 1631.52   1
   2  -7  -9 -256.58 1900.14   1
   2  -7  -9 2657.27 1963.12   1
  -2   7   8  22025. 2336.11   1
  -2   7   8  20285. 1971.47   1
   2  -7  -8  20602. 2080.03   1
   2  -7  -8  19168. 2140.22   1
  -2   7   7  304.52 1678.84   1
  -2   7   7 -1026.1 1725.47   1
   2  -7  -7  615.87 1691.72   1
   2  -7  -7 2839.59 1994.78   1
  -2   7   6 9380.65 1823.24   1
  -2   7   6 8406.39 2276.96   1
   2  -7  -6 8879.60 1930.06   1
   2  -7  -6 8587.33 1925.19   1
  -2   7   5 1381.70 1860.12   1
  -2   7   5 -235.35 1695.54   1
   2  -7  -5 -408.84 1913.01   1
   2  -7  -5  613.08 1530.97   1
  -2   7   4 5508.00 1803.41   1
  -2   7   4 5848.99 2142.66   1
   2  -7  -4 4613.77 1540.01   1
   2  -7  -4 6012.52 1873.35   1
  -2   7   3  13208. 2256.78   1
  -2   7   3  13086. 1849.34   1
   2  -7  -3  11761. 1921.01   1
   2  -7  -3  12502. 2025.75   1
  -2   7   2 -182.81 1897.35   1
  -2   7   2 -646.14 1602.99   1
   2  -7  -2 -2295.8 1630.13   1
   2  -7  -2 -2088.7 1874.04   1
  -2   7   1 138692. 5535.83   1
  -2   7   1 126096. 5003.47   1
   2  -7  -1 132742. 5267.91   1
   2  -7  -1 116179. 4836.46   1
  -2   7   0  63674. 3212.59   1
  -2   7   0  63465. 3035.49   1
   2  -7   0  70320. 3277.66   1
   2  -7   0  65136. 3257.13   1
  -2   7  -1 2116.21 1683.71   1
  -2   7  -1 3126.30 1609.25   1
   2  -7   1 2658.31 1663.88   1
   2  -7   1 1234.17 1693.46   1
  -2   7  -2 1588.72 1713.29   1
  -2   7  -2 -1386.9 1661.45   1
   2  -7   2  429.71 1502.78   1
   2  -7   2 -415.80 1701.81   1
  -2   7  -3  60717. 2952.33   1
  -2   7  -3  60299. 3072.37   1
   2  -7   3  59812. 2869.87   1
   2  -7   3  59812. 2997.91   1
  -2   7  -4  59464. 3106.82   1
  -2   7  -4  62352. 2946.41   1
   2  -7   4  51183. 2814.54   1
   2  -7   4  59395. 2898.05   1
  -2   7  -5 3729.99 1660.75   1
  -2   7  -5 3186.50 1984.69   1
   2  -7   5 1645.09 1845.51   1
   2  -7   5  739.04 1827.76   1
  -2   7  -6  97042. 4248.43   1
  -2   7  -6  95929. 4039.66   1
   2  -7   6 100522. 4328.46   1
   2  -7   6  88622. 3653.44   1
  -2   7  -7  62735. 3216.07   1
  -2   7  -7  57307. 2795.75   1
   2  -7   7  58525. 2792.97   1
   2  -7   7  56681. 2887.61   1
  -2   7  -8 1125.61 1786.71   1
  -2   7  -8 -1584.2 1651.70   1
   2  -7   8  258.14 1760.96   1
   2  -7   8 1181.28 1672.58   1
  -2   7  -9 5988.16 1896.66   1
  -2   7  -9 7393.87 1857.69   1
   2  -7   9 7261.65 1998.61   1
   2  -7   9 6503.12 1802.71   1
  -2   7 -10  18128. 2128.04   1
  -2   7 -10  20219. 1929.02   1
   2  -7  10  20985. 2029.92   1
   2  -7  10  21527. 1958.94   1
  -2   7 -11  10188. 1484.34   1
  -2   7 -11 9450.23 2048.36   1
   2  -7  11 8521.22 1528.53   1
   2  -7  11 6729.29 1534.45   1
  -2   7 -12  28445. 1905.01   1
  -2   7 -12  28145. 2333.33   1
   2  -7  12  26434. 2238.34   1
   2  -7  12  26952. 2149.96   1
  -2   7 -13 9700.76 2204.94   1
  -2   7 -13  10010. 1791.23   1
   2  -7  13 6419.62 1872.65   1
   2  -7  13 8305.49 1611.69   1
  -2   7 -14 5177.45 1873.69   1
   2  -7  14 4217.11 2163.53   1
   2  -7  14 -1105.8 1878.91   1
  -2   7 -15  15411. 2645.44   1
  -2   7 -15  13222. 1972.86   1
   2  -7  15  18013. 2467.64   1
   2  -7  15  20310. 2545.23   1
  -2   7 -16 6858.03 2407.10   1
  -2   7 -16 9892.13 2207.72   1
   2  -7  16  12008. 2569.93   1
   2  -7  16 9210.15 2307.24   1
  -2   7 -17 -2454.8 2279.40   1
  -2   7 -17 -517.05 1651.01   1
   2  -7  17 2130.13 1766.18   1
   2  -7  17  978.08 2050.45   1
  -2   7 -18  52331. 3549.06   1
  -2   7 -18  52053. 3220.25   1
   2  -7  18  52053. 3340.64   1
   2  -7  18  47634. 3337.51   1
  -2   7 -19  754.70 2621.78   1
  -2   7 -19  166.81 2461.72   1
   2  -7  19 5100.90 2683.37   1
   2  -7  19  172.79 2418.58   1
  -2   7 -20 5271.39 2595.68   1
  -2   7 -20 -1900.5 2630.13   1
   2  -7  20 -1661.1 2574.81   1
   2  -7  20  667.71 2410.92   1
  -2   7 -21 -1370.2 2678.15   1
  -2   7 -21 -5163.5 2461.72   1
   2  -7  21 3405.36 2649.27   1
   2  -7  21  599.51 2207.72   1
  -2   7 -22 8155.87 2692.41   1
  -2   7 -22  10456. 3054.28   1
   2  -7  22 4335.42 2664.23   1
   2  -7  22 2781.14 2588.03   1
  -2   7 -23 9279.74 3067.85   1
  -2   7 -23 -2952.7 2465.55   1
   2  -7  23 1306.54 2616.91   1
   2  -7  23 1373.35 2153.09   1
  -2   7 -24  16541. 2899.09   1
  -2   7 -24  14193. 2594.29   1
   2  -7  24  12049. 2527.14   1
   2  -7  24  15553. 2367.43   1
  -2   7 -25  936.67 3127.69   1
  -2   7 -25 6339.59 2483.64   1
   2  -7  25 8851.77 2802.71   1
  -2   7 -26  631.18 2836.81   1
  -2   7 -26 6771.04 3405.70   1
   2  -7  26 2458.94 3268.26   1
   2  -7  26 8354.20 3014.96   1
  -2   6  24  10884. 2787.05   1
  -2   6  24 2657.97 2931.45   1
   2  -6 -24 5034.79 2246.34   1
   2  -6 -24 2571.33 3440.50   1
  -2   6  23 3757.83 2961.72   1
  -2   6  23 5661.09 2258.17   1
   2  -6 -23 5810.71 3050.10   1
   2  -6 -23 2087.68 2960.33   1
  -2   6  22 2534.10 2655.53   1
  -2   6  22 6983.29 2710.85   1
   2  -6 -22 4161.44 3029.92   1
   2  -6 -22 -3022.3 3217.46   1
  -2   6  21 -2447.5 2565.41   1
  -2   6  21 -206.54 2104.03   1
   2  -6 -21  525.75 2005.91   1
   2  -6 -21 2637.09 3353.16   1
  -2   6  20 1903.96 2667.01   1
  -2   6  20  795.75 2573.41   1
   2  -6 -20 -3768.3 3345.86   1
   2  -6 -20 -3632.6 2630.13   1
  -2   6  19 -363.26 2303.06   1
  -2   6  19 5045.23 2785.31   1
   2  -6 -19 5191.37 2851.08   1
   2  -6 -19 5243.56 3156.57   1
  -2   6  18 4251.91 2826.02   1
  -2   6  18 5424.49 2278.70   1
   2  -6 -18 1496.87 2858.73   1
   2  -6 -18 3195.89 2719.55   1
  -2   6  17 -1880.3 2700.42   1
  -2   6  17 1163.53 2344.81   1
   2  -6 -17 -1877.2 2735.91   1
   2  -6 -17 4537.23 2979.82   1
  -2   6  16 5278.35 2903.96   1
  -2   6  16 3142.66 2504.17   1
   2  -6 -16 8615.16 2925.19   1
   2  -6 -16 4098.81 2999.30   1
  -2   6  15  17999. 3326.37   1
  -2   6  15  18622. 2580.03   1
   2  -6 -15  16754. 2788.45   1
   2  -6 -15  16152. 2940.50   1
  -2   6  14 -1733.1 3015.65   1
  -2   6  14 2444.33 2162.84   1
   2  -6 -14 3456.16 2483.99   1
   2  -6 -14 -1663.5 2615.52   1
  -2   6  13  17735. 2083.16   1
  -2   6  13  24656. 2343.77   1
   2  -6 -13  25852. 2199.37   1
   2  -6 -13  20884. 2431.10   1
  -2   6  12  14106. 2098.12   1
  -2   6  12 9077.93 2287.40   1
   2  -6 -12  11162. 2240.78   1
   2  -6 -12  12356. 2319.07   1
  -2   6  11  29395. 2683.37   1
  -2   6  11  38135. 2564.37   1
   2  -6 -11  37300. 2768.61   1
   2  -6 -11  41127. 2533.40   1
  -2   6  10 2284.62 1661.45   1
  -2   6  10 4119.69 2287.05   1
   2  -6 -10 -1800.6 2268.96   1
   2  -6 -10 -2553.2 2028.18   1
  -2   6   9  63639. 3479.47   1
  -2   6   9  57864. 3010.78   1
   2  -6  -9  60508. 3314.89   1
   2  -6  -9  61134. 3415.10   1
  -2   6   8 2223.73 2247.74   1
  -2   6   8 3990.95 1728.25   1
   2  -6  -8 2309.67 2121.43   1
   2  -6  -8 4269.31 1988.17   1
  -2   6   7  14370. 2162.49   1
  -2   6   7  11503. 1948.15   1
   2  -6  -7  17582. 2011.13   1
   2  -6  -7  12223. 2123.87   1
  -2   6   6  84481. 4011.83   1
  -2   6   6  88205. 3855.25   1
   2  -6  -6  93250. 4070.98   1
   2  -6  -6  90153. 4004.87   1
  -2   6   5  11510. 2213.29   1
  -2   6   5  13469. 1874.39   1
   2  -6  -5 9561.58 1836.12   1
   2  -6  -5  12293. 1915.10   1
  -2   6   4  12724. 1760.26   1
  -2   6   4  12418. 2321.85   1
   2  -6  -4  10275. 1900.83   1
   2  -6  -4  12888. 1941.20   1
  -2   6   3  11534. 1683.71   1
  -2   6   3  12596. 2195.54   1
   2  -6  -3  10317. 1743.91   1
   2  -6  -3 9843.41 1807.58   1
  -2   6   2  35003. 2459.64   1
  -2   6   2  34899. 2328.81   1
   2  -6  -2  34415. 2376.13   1
   2  -6  -2  36221. 2273.83   1
  -2   6   1 -1091.5 1617.26   1
  -2   6   1 -2034.4 1705.29   1
   2  -6  -1 1158.31 1679.19   1
   2  -6  -1  801.67 1727.56   1
  -2   6   0 103862. 4311.06   1
  -2   6   0 102331. 4199.72   1
   2  -6   0 103758. 4366.73   1
   2  -6   0 103862. 4279.75   1
  -2   6  -1 4446.76 1853.86   1
  -2   6  -1 3823.94 1515.66   1
   2  -6   1 3893.52 1632.57   1
   2  -6   1 3047.32 1743.56   1
  -2   6  -2  251.70 1635.70   1
  -2   6  -2 -107.62 1506.26   1
   2  -6   2 2365.69 1612.73   1
   2  -6   2  671.54 1761.65   1
  -2   6  -3 -1380.3 1675.02   1
  -2   6  -3 2633.96 1750.87   1
   2  -6   3 -1140.6 1640.92   1
   2  -6   3 2352.47 1776.96   1
  -2   6  -4 9711.19 1996.87   1
  -2   6  -4  14763. 1814.19   1
   2  -6   4  12954. 1864.99   1
   2  -6   4  13045. 1853.86   1
  -2   6  -5 8225.46 1721.29   1
  -2   6  -5  10240. 2053.58   1
   2  -6   5 8903.96 1643.00   1
   2  -6   5  10592. 1930.41   1
  -2   6  -6 -626.65 1700.76   1
  -2   6  -6 2939.11 1807.93   1
   2  -6   6 4154.48 1784.97   1
   2  -6   6 2600.21 1713.64   1
  -2   6  -7 3038.62 1730.34   1
  -2   6  -7 1931.80 1645.79   1
   2  -6   7 4933.89 1639.18   1
   2  -6   7 1446.41 1666.32   1
  -2   6  -8  13681. 1696.94   1
  -2   6  -8  12756. 1873.00   1
   2  -6   8  12029. 1616.21   1
   2  -6   8  12498. 1775.22   1
  -2   6  -9 2462.42 1901.18   1
  -2   6  -9 2100.21 1723.03   1
   2  -6   9 5306.19 1689.98   1
   2  -6   9 4206.68 1789.84   1
  -2   6 -10  56785. 2982.95   1
  -2   6 -10  58594. 2994.08   1
   2  -6  10  57690. 3065.76   1
   2  -6  10  55532. 2879.61   1
  -2   6 -11  39666. 2743.56   1
  -2   6 -11  42102. 2624.21   1
   2  -6  11  43319. 2825.33   1
[truncated: 1,257,134 more chars]
